# Supplementary material for: Sexually dimorphic renal expression of mouse Klotho is directed by a kidney-specific distal enhancer responsive to HNF1b
Source: Commun Biol. 2024 Sep 14;7:1142. doi: 10.1038/s42003-024-06855-6 (PMC11401919; doi:10.1038/s42003-024-06855-6)
Supplement: Supplementary file 4 — Supplementary Data 1 [file 42003_2024_6855_MOESM4_ESM.xlsx]

## Sheet: Sheet1
Supplementary Spreadsheet 1

## Sheet: WT M_vs_WT F
Gene	WT M1	WT M2	WT M3	WT M4	WT F1	WT F2	WT F3	WT F4	WT M	WT F	Fold	Base mean	log2(FC)	StdErr	Wald-Stats	P-value	P-adj
Ugt1a2	58.7303	53.2561	45.4443	49.6801	14290.7	15345.3	12996.3	12088.8	51.7777	13680.3	0.00378484	6574.76	8.04367	0.170729	47.1138	0	0
Xist	4.73631	4.53244	3.09848	9.51321	16058.3	11929.2	15505.7	16108.5	5.47011	14900.4	0.000367111	7196.47	11.4157	0.365338	31.2469	2.45755e-214	2.59345e-210
BC089597	929.264	747.852	813.866	825.535	9025.06	9758.11	7255.56	7344.68	829.129	8345.85	0.0993463	4520.31	3.33093	0.136765	24.3552	5.11099e-131	3.59576e-127
Chst11	2762.22	2904.16	3013.78	2677.44	481.805	425.259	468.706	541.866	2839.4	479.409	5.92271	1609.88	-2.56652	0.105973	-24.2186	1.41709e-129	7.47725e-126
Igf2	25.5761	43.0582	17.558	25.3686	793.506	889.178	973.033	854.268	27.8902	877.496	0.0317839	568.327	4.9878	0.211982	23.5294	2.04267e-122	8.62253e-119
Ccdc170	60.6248	41.925	42.3458	48.6231	626.252	624.709	613.067	617.432	48.3797	620.365	0.0779858	374.756	3.67308	0.160837	22.8373	1.95473e-115	6.8761e-112
Abcc3	64.4138	117.843	86.7573	89.8469	4162.34	3321.24	3072.83	2525.94	89.7154	3270.59	0.027431	1950.88	5.19194	0.232155	22.3642	8.79217e-111	2.65097e-107
Degs2	1516.57	1627.15	1691.77	1596.1	230.924	260.076	287.785	246.051	1607.9	256.209	6.27572	979.252	-2.64953	0.120488	-21.99	3.59336e-107	9.48019e-104
Serpinf2	10087.4	10416.7	11799	10586.1	1775.17	1703.67	1459.55	1085.57	10722.3	1505.99	7.11975	6364.97	-2.83181	0.129593	-21.8516	7.50454e-106	1.7599e-102
Cyp2e1	57262	41512.6	54138.6	46732	3372.64	3453.91	2636	3038.32	49911.3	3125.22	15.9705	27907.7	-3.99733	0.188771	-21.1756	1.60488e-99	3.38726e-96
Amacr	9565.45	8760.07	10755.8	9617.85	2382.42	2512.01	2193.54	2106.64	9674.8	2298.65	4.2089	6442.86	-2.07342	0.0984821	-21.0538	2.11265e-98	4.0536e-95
Cyp4a14	211.239	122.376	124.972	100.417	9459.35	9824.89	6147.54	6219.47	139.751	7912.81	0.0176614	4166.24	5.82124	0.283034	20.5673	5.38984e-94	9.47983e-91
Cyp4b1	130880	123251	148675	137354	4048.3	6776.9	5370.43	6694.99	135040	5722.66	23.5974	72935.5	-4.56054	0.227836	-20.0168	3.93459e-89	6.38795e-86
Ugt8a	7481.48	4900.7	5177.55	4910.93	427.638	524.545	342.155	526.199	5617.66	455.134	12.3429	3096.95	-3.6254	0.181905	-19.9302	2.22889e-88	3.36021e-85
Acsm2	190775	159890	181129	171505	52673.6	50549.6	51252	48070.3	175825	50636.4	3.4723	113430	-1.7959	0.0913689	-19.6554	5.19306e-86	7.30698e-83
Slc17a2	13.2617	7.93177	7.22978	5.28511	482.756	481.491	445.27	612.824	8.42708	505.585	0.016668	285.74	5.88816	0.309673	19.0141	1.30291e-80	1.7187e-77
LOC108167727	303.124	250.417	350.128	323.449	7.60245	4.39317	9.37411	7.37232	306.779	7.18551	42.6942	164.328	-5.4249	0.298183	-18.1932	5.84291e-74	7.25415e-71
Glt1d1	602.459	548.425	568.054	608.845	158.701	151.125	107.802	112.428	581.946	132.514	4.39158	350.833	-2.13458	0.119236	-17.9022	1.13362e-71	1.32923e-68
Cbr1	536.15	552.957	570.119	664.867	5532.68	5718.15	4007.43	3613.36	581.024	4717.91	0.123153	2907.28	3.02161	0.169097	17.8691	2.0516e-71	2.279e-68
Slc22a30	4705.05	3327.94	3876.19	3704.87	173.906	159.033	189.357	229.463	3903.51	187.94	20.77	2032.36	-4.37663	0.246385	-17.7634	1.35776e-70	1.43285e-67
Cyp4a32	681.082	687.797	704.387	880.5	34.211	45.689	27.1849	58.9786	738.441	41.5159	17.787	338.492	-4.1507	0.237018	-17.5122	1.15703e-68	1.16287e-65
Fbxo40	2525.4	2414.66	2626.47	2214.46	927.499	835.581	749.929	853.346	2445.25	841.589	2.90551	1624.28	-1.539	0.0891968	-17.254	1.04392e-66	1.0015e-63
Ces1f	34980.5	24198.7	29950.9	29436	4526.31	4266.65	3709.34	3924.84	29641.5	4106.78	7.2177	17830.6	-2.85155	0.170363	-16.7381	6.91256e-63	6.34333e-60
Timd2	3153.44	2009	2502.54	2365.62	262.285	190.664	196.856	237.757	2507.65	221.89	11.3013	1362.75	-3.49892	0.209486	-16.7024	1.258e-62	1.10631e-59
Arg2	76.7282	70.2528	79.5275	80.3337	480.855	508.729	455.582	528.043	76.7106	493.302	0.155504	302.501	2.68403	0.16191	16.5773	1.01683e-61	8.58452e-59
Ugt2b38	28603.5	15221.1	21939.3	18178.7	2171.45	2524.32	1730.46	2008.96	20985.6	2108.8	9.95148	11431.5	-3.31489	0.200556	-16.5285	2.28657e-61	1.85617e-58
Fmo5	2933.67	3523.97	3433.11	3213.35	466.6	450.739	394.65	384.282	3276.03	424.068	7.72524	2021.27	-2.94949	0.178594	-16.5151	2.85647e-61	2.23292e-58
Lipo3	2147.44	1364.26	2203.02	2142.59	282.241	242.503	233.415	336.362	1964.33	273.63	7.17876	987.538	-2.84413	0.172895	-16.45	8.38531e-61	6.32072e-58
Gm36130	33.1542	35.1264	51.6413	57.0792	325.005	260.076	279.349	271.854	44.2503	284.071	0.155772	167.424	2.68421	0.163526	16.4146	1.50305e-60	1.09391e-57
Acox3	8740.39	10420.1	11103.9	10637.9	3617.82	3545.29	3393.43	2856.77	10225.6	3353.33	3.04938	6837.09	-1.60846	0.0980579	-16.4031	1.81645e-60	1.27793e-57
Cndp2	42661.9	37015.3	48781.4	41089.7	6840.3	6638.96	5811.95	5414.97	42387	6176.55	6.86258	23785.6	-2.77875	0.169725	-16.3721	3.02731e-60	2.06111e-57
Abcb1b	212.187	162.035	190.04	160.667	951.257	1122.89	1304.88	1403.51	181.232	1195.63	0.151578	635.63	2.72001	0.168564	16.1364	1.41542e-58	9.33561e-56
Gm15348	285.126	266.281	342.898	281.168	7.60245	11.4222	16.8734	11.0585	293.868	11.7391	25.0332	166.575	-4.6455	0.290362	-15.999	1.29803e-57	8.30187e-55
Prlr	441.424	322.936	276.797	242.058	9675.07	9833.67	6925.59	7246.99	320.804	8420.33	0.0380987	4287.83	4.71362	0.294713	15.9939	1.40876e-57	8.74511e-55
Treh	3199.85	3060.53	3554.98	3405.73	1191.68	1185.28	1073.34	940.893	3305.27	1097.8	3.01082	2265.01	-1.59016	0.100572	-15.8111	2.60709e-56	1.57215e-53
Osbp2	966.208	1318.94	1471.78	1341.36	285.092	253.925	273.724	198.131	1274.57	252.718	5.04345	820.008	-2.33435	0.147932	-15.7799	4.28192e-56	2.5104e-53
Galns	4648.22	5998.68	6453.09	6148.7	1228.75	1322.34	1126.77	927.069	5812.17	1151.23	5.04865	3643.25	-2.33577	0.149298	-15.645	3.59383e-55	2.05004e-52
Kif20b	1151.87	768.248	1105.12	850.903	139.695	146.732	120.926	128.094	969.036	133.862	7.23908	561.619	-2.85597	0.183469	-15.5665	1.22963e-54	6.8296e-52
Csgalnact1	1165.13	824.904	1035.92	820.25	229.974	230.202	239.04	240.522	961.552	234.935	4.09285	545.374	-2.03403	0.132227	-15.3828	2.13447e-53	1.15513e-50
Slc22a29	201.767	116.71	111.545	113.101	890.437	867.212	1095.83	1394.29	135.781	1061.94	0.127861	592.092	2.96334	0.19559	15.1508	7.48397e-52	3.94892e-49
Cdh6	264.286	243.619	181.777	187.093	1259.16	1293.35	998.343	1080.97	219.194	1157.95	0.189294	685.904	2.40071	0.158485	15.1478	7.83003e-52	4.03075e-49
Capg	233.974	252.683	297.454	309.708	1697.25	1755.51	1313.31	1147.32	273.455	1478.35	0.184973	942.267	2.43508	0.161373	15.0898	1.89138e-51	9.50463e-49
Ces1g	4707.89	3338.14	3715.07	3666.81	156.801	216.144	112.489	115.193	3856.98	150.157	25.6864	1628.29	-4.68242	0.310848	-15.0634	2.81874e-51	1.3521e-48
Gm31369	21.787	18.1298	29.9519	34.8818	242.328	292.585	222.166	242.365	26.1876	249.861	0.104809	137.448	3.25338	0.215976	15.0636	2.80877e-51	1.3521e-48
Slc22a28	3951.03	2497.37	2973.5	2778.91	224.272	221.416	410.586	439.575	3050.21	323.962	9.41531	1718.11	-3.23535	0.215201	-15.0341	4.38931e-51	2.05868e-48
Gm34687	5.68357	9.06488	3.09848	3.17107	262.285	217.901	239.04	196.288	5.2545	228.878	0.0229576	122.979	5.46015	0.364529	14.9786	1.013e-50	4.64789e-48
Gsta4	843.063	582.418	653.778	644.784	3820.23	4263.13	2554.45	3382.05	681.011	3504.97	0.194299	1968.74	2.36293	0.159604	14.805	1.35997e-49	6.10715e-47
Ephx2	18182.7	12978.6	15585.3	14886.1	5127.85	6058.18	5222.32	5521.87	15408.2	5482.56	2.8104	10933.1	-1.4908	0.102564	-14.5354	7.229e-48	3.17865e-45
Atp11a	54241.2	79615.7	79255.9	73148.1	18454	18844.9	15962.2	12702.5	71565.2	16490.9	4.33967	44608.6	-2.11757	0.145973	-14.5067	1.0994e-47	4.7355e-45
Ugt1a1	51.1522	48.7237	23.755	30.6537	415.284	425.259	431.209	479.201	38.5711	437.738	0.0881146	218.45	3.50335	0.242431	14.4509	2.47334e-47	1.04405e-44
Gm30551	12.3144	14.7304	23.755	8.45618	168.204	168.698	146.236	187.073	14.814	167.553	0.088414	107.675	3.50107	0.244025	14.3472	1.11004e-46	4.50548e-44
Hrg	142.089	183.564	243.747	212.462	6.65214	6.15044	6.56188	5.52924	195.465	6.22343	31.408	95.2091	-4.97326	0.346614	-14.3481	1.09456e-46	4.50548e-44
Gm40228	224.501	189.229	335.668	360.445	4.75153	9.66497	5.62447	7.37232	277.461	6.85332	40.4856	124.701	-5.33168	0.372171	-14.3259	1.50756e-46	6.0035e-44
Erc2	1269.33	1210.16	1160.9	1146.87	409.582	437.56	353.404	362.165	1196.81	390.678	3.06343	812.725	-1.6149	0.112934	-14.2996	2.20136e-46	8.60407e-44
Cpox	3064.39	2784.05	3135.66	2871.93	1322.83	1303.01	1181.14	1177.73	2964.01	1246.18	2.37848	2207.53	-1.25016	0.0886264	-14.106	3.48895e-45	1.33887e-42
Acsm3	42995.3	24562.4	33897.3	29916.9	157.751	165.183	190.294	245.13	32843	189.59	173.232	13990.5	-7.43657	0.528764	-14.0641	6.31482e-45	2.38001e-42
Lap3	15603.3	13342.4	16210.2	15296.2	6216.9	6566.03	5818.51	5642.59	15113	6061.01	2.49348	11095.8	-1.31818	0.093738	-14.0624	6.4698e-45	2.39564e-42
Cyp7b1	8025.21	6176.58	7345.45	6648.67	144.447	125.645	134.05	138.231	7048.98	135.593	51.9863	3751.41	-5.70015	0.406316	-14.0288	1.03822e-44	3.77806e-42
Azgp1	3932.09	3168.17	3562.21	3624.53	185.31	202.964	214.667	268.168	3571.75	217.777	16.4009	1899.55	-4.0357	0.287977	-14.014	1.28045e-44	4.58055e-42
Acnat1	1464.47	1287.21	1108.22	1067.59	3632.07	3568.13	3573.41	3682.47	1231.87	3614.02	0.340859	2406.01	1.55239	0.111203	13.9599	2.73922e-44	9.63568e-42
Chst7	405.428	565.422	650.68	619.415	95.9809	93.1352	74.0555	48.8416	560.236	78.0033	7.18221	364.634	-2.84365	0.203979	-13.9409	3.57327e-44	1.23635e-41
Fbxl2	333.436	318.404	323.274	305.48	91.2294	57.1112	70.3058	82.0171	320.148	75.1659	4.25923	186.043	-2.09379	0.150407	-13.9208	4.7351e-44	1.61192e-41
Slco3a1	3839.25	5786.79	5855.09	5581.08	1462.52	1556.06	1277.69	1064.38	5265.55	1340.16	3.92904	3502.36	-1.97398	0.142175	-13.8842	7.90127e-44	2.64705e-41
Col19a1	179.98	216.424	277.83	292.795	23.7577	27.2377	22.4979	26.7247	241.757	25.0545	9.64927	152.789	-3.26834	0.236982	-13.7915	2.8672e-43	9.45548e-41
Kcnk1	717.078	695.729	685.796	771.627	2914.59	2989.11	2414.77	2381.26	717.557	2674.93	0.268252	1888.53	1.89834	0.14052	13.5094	1.37723e-41	4.47197e-39
Gm19950	2525.4	2567.63	2408.55	2346.59	494.159	415.594	481.829	623.883	2462.04	503.866	4.8863	1511	-2.2889	0.169449	-13.5079	1.40533e-41	4.49406e-39
A830021M18Rik	127.88	151.837	152.858	142.698	13.3043	19.3299	7.49929	7.37232	143.818	11.8765	12.1095	71.2249	-3.58816	0.267369	-13.4203	4.60136e-41	1.4495e-38
Slc30a2	1913.47	2356.87	2842.33	2468.15	812.512	861.061	842.733	656.137	2395.21	793.111	3.02001	1594.28	-1.59431	0.119455	-13.3465	1.24198e-40	3.85488e-38
Smarca2	9395.89	11553.2	11688.5	11001.5	4729.67	4649.73	4527.7	4793.85	10909.8	4675.24	2.33352	8007.47	-1.22244	0.0922541	-13.2507	4.46726e-40	1.36646e-37
Myof	1594.24	1417.52	1326.15	1306.48	2670.36	2937.27	2854.42	2938.79	1411.1	2850.21	0.495085	2050.19	1.01377	0.0766145	13.2321	5.72333e-40	1.72567e-37
Upp2	840.222	538.227	726.076	656.411	124.49	104.557	60.9317	72.8017	690.234	90.6952	7.61048	385.036	-2.9284	0.222943	-13.1352	2.06996e-39	6.15332e-37
Bhmt	69.1501	47.5906	32.0176	42.2809	455.197	417.351	407.774	338.205	47.7598	404.632	0.118033	187.686	3.07755	0.234359	13.1318	2.16456e-39	6.34516e-37
Slc47a1	28406.5	23125.6	24998.5	24160.4	11253.5	12093.5	12068.2	12756	25172.8	12042.8	2.09027	18688.9	-1.06373	0.0812626	-13.09	3.75606e-39	1.05701e-36
Kynu	196.083	130.308	108.447	128.957	1074.8	1013.07	1089.27	1365.72	140.949	1135.71	0.124106	635.964	3.00831	0.231377	13.0018	1.19528e-38	3.31942e-36
Hsd17b11	6610.94	7124.99	9437.96	7461.52	2038.41	1851.28	1572.98	1439.45	7658.85	1725.53	4.43856	4473.69	-2.15009	0.165621	-12.982	1.54768e-38	4.24224e-36
Elovl6	1399.11	882.692	745.7	786.425	3843.04	4410.74	4313.97	4273.18	953.481	4210.23	0.226468	2508.93	2.14191	0.165443	12.9465	2.46005e-38	6.65664e-36
Slco4c1	1512.78	1155.77	1178.45	1171.18	301.247	340.91	293.41	355.715	1254.55	322.82	3.88621	835.064	-1.95845	0.151646	-12.9146	3.72291e-38	9.94631e-36
Nat8f2	1805.48	1233.96	1455.25	1400.56	382.973	478.856	347.78	390.733	1473.81	400.085	3.68374	1068.19	-1.88113	0.145698	-12.9112	3.89436e-38	1.02743e-35
Padi2	26.5233	49.8568	48.5428	39.1098	228.073	241.624	231.541	192.602	41.0082	223.46	0.183515	134.856	2.45624	0.190443	12.8975	4.65004e-38	1.21165e-35
Agps	25069.3	16800.6	21470.4	18609.9	4874.12	5271.8	4320.53	5285.95	20487.6	4938.1	4.14887	12693.8	-2.05273	0.160095	-12.822	1.23517e-37	3.1792e-35
Gm31091	15.1562	16.9966	10.3283	11.6273	203.366	153.761	129.363	150.211	13.5271	159.175	0.0849824	79.9347	3.55872	0.278762	12.7662	2.53337e-37	6.44209e-35
AW822252	148.72	177.898	194.171	201.891	32.3104	36.024	22.4979	11.98	180.67	25.7031	7.02913	103.76	-2.80948	0.220638	-12.7335	3.85379e-37	9.56919e-35
Fcamr	3660.22	3344.94	3381.47	3701.69	499.861	494.671	593.381	635.863	3522.08	555.944	6.33532	2049.59	-2.66348	0.209441	-12.7171	4.75388e-37	1.16669e-34
Plppr4	161.035	120.11	123.939	133.185	403.88	443.71	431.209	396.262	134.567	418.765	0.321342	285.617	1.634	0.128959	12.6707	8.598e-37	2.08585e-34
Ankrd29	602.459	500.834	531.905	547.538	191.012	195.935	187.482	243.287	545.684	204.429	2.66931	397.621	-1.41734	0.111912	-12.6648	9.26968e-37	2.22325e-34
Gc	1271.23	836.235	824.194	801.223	4137.63	3910.8	3398.12	3641.93	933.22	3772.12	0.247399	2444.07	2.0144	0.16045	12.5547	3.74645e-36	8.88455e-34
Baat	53.994	45.3244	32.0176	29.5966	415.284	280.284	213.73	337.284	40.2331	311.645	0.129099	149.233	2.94984	0.236163	12.4907	8.39134e-36	1.96786e-33
Gm31774	131.669	123.509	187.974	155.382	5.70184	1.75727	11.2489	6.45078	149.634	6.28971	23.7903	75.1256	-4.58466	0.36732	-12.4814	9.4343e-36	2.18814e-33
Ldhd	19979.7	30095.4	32934.7	29951.8	7498.87	8184.48	6829.04	5024.24	28240.4	6884.16	4.10223	18924.2	-2.03638	0.164177	-12.4036	2.49884e-35	5.73266e-33
Tc2n	667.82	426.049	633.122	510.542	109.285	115.98	82.4922	130.859	559.383	109.654	5.10135	323.363	-2.35119	0.190025	-12.373	3.65744e-35	8.30042e-33
Kcnip2	25.5761	20.396	25.8206	31.7107	172.956	231.081	152.798	135.466	25.8758	173.075	0.149506	100.667	2.73991	0.221551	12.367	3.94507e-35	8.85794e-33
Pde6a	519.1	664.002	656.877	632.1	114.987	83.4702	135.925	128.094	618.02	115.619	5.34531	461.416	-2.41904	0.196523	-12.3092	8.08275e-35	1.79573e-32
Irf6	3022.71	2389.73	2592.39	2578.08	1214.49	1206.36	1003.03	993.42	2645.73	1104.33	2.39578	1907.7	-1.26073	0.102515	-12.298	9.28471e-35	2.04128e-32
Myh1	2.84179	1.13311	6.19695	0	222.372	152.882	181.858	205.503	2.54296	190.654	0.0133381	100.504	6.20082	0.504454	12.2921	9.98263e-35	2.1721e-32
Gbp3	396.903	265.148	330.504	332.962	2233.22	1512.13	1368.62	1628.36	331.379	1685.58	0.196596	979.752	2.34553	0.192026	12.2146	2.59636e-34	5.53522e-32
Arhgef39	382.694	416.984	434.819	399.555	171.055	159.911	157.485	163.113	408.513	162.891	2.50789	295.039	-1.32613	0.109101	-12.1551	5.38899e-34	1.1374e-31
Sepp1	94660.9	66039.9	87378	85610.4	30388.9	28911.5	23326.5	27109.9	83422.3	27434.2	3.04082	56207.7	-1.60447	0.132493	-12.1098	9.37129e-34	1.95832e-31
Kyat1	2134.18	2890.56	3489.92	3399.39	902.791	913.779	919.6	735.389	2978.51	867.89	3.4319	1986.34	-1.77886	0.147718	-12.0422	2.13099e-33	4.40948e-31
Mogat1	2981.98	2232.23	2560.37	2529.46	599.643	688.849	384.339	420.222	2576.01	523.263	4.92297	1719.09	-2.29938	0.192024	-11.9744	4.83762e-33	9.9129e-31
Acy3	32586.8	47430.8	49666.5	45977.3	11855.1	13038.1	9810.95	7756.6	43915.4	10615.2	4.13704	27302.8	-2.04858	0.171276	-11.9607	5.70697e-33	1.15819e-30
Gm27216	297.44	253.817	341.865	306.537	71.273	56.2326	50.6202	43.3124	299.915	55.3595	5.41758	190.893	-2.43901	0.204064	-11.9522	6.32209e-33	1.2708e-30
Znrf1	5741.36	4152.85	4828.46	4268.26	1257.26	1267.87	1231.76	1186.02	4747.73	1235.73	3.84206	2720.86	-1.94197	0.163196	-11.8996	1.18921e-32	2.36788e-30
Gm16010	176.191	194.895	181.777	186.036	656.662	722.237	1018.03	1024.75	184.725	855.42	0.215946	537.917	2.21174	0.1861	11.8847	1.42145e-32	2.80385e-30
Hacl1	1534.56	906.488	1092.73	1077.11	3900.06	3989.88	3438.42	3391.27	1152.72	3679.91	0.313248	2584.47	1.67381	0.141175	11.8563	1.99491e-32	3.89856e-30
Me1	10345.1	8916.44	9982.25	9145.36	4497.8	4930.89	4628.94	4709.07	9597.28	4691.68	2.0456	7306.81	-1.03256	0.087163	-11.8463	2.24841e-32	4.35367e-30
Acox1	49312.6	46930	54029.1	52041.5	21565.3	23961.2	17891.4	17820.7	50578.3	20309.7	2.49035	35831.1	-1.31634	0.111149	-11.843	2.33923e-32	4.48835e-30
Slc22a22	4919.13	2941.55	3633.48	3378.25	1125.16	1093.02	878.354	988.813	3718.1	1021.34	3.64042	2421.66	-1.86428	0.157938	-11.8039	3.72823e-32	7.08902e-30
Oat	6030.27	4371.54	5048.45	4643.5	12777.8	14653	11946.4	13486.7	5023.44	13216	0.380104	9669.91	1.39538	0.118547	11.7707	5.5262e-32	1.04139e-29
Olfm4	946.315	615.278	705.42	787.482	233.775	246.018	225.916	257.11	763.624	240.705	3.17245	489.337	-1.66642	0.141748	-11.7562	6.56055e-32	1.22537e-29
Ubiad1	2060.3	2554.03	2892.94	2721.83	1111.86	1179.13	1135.21	952.873	2557.28	1094.77	2.33591	1859.92	-1.22366	0.10425	-11.7378	8.16228e-32	1.51117e-29
Srd5a1	702.869	797.709	826.26	793.824	338.309	301.371	254.038	210.111	780.165	275.958	2.82712	533.232	-1.49908	0.128195	-11.6937	1.3725e-31	2.51896e-29
Gm42060	95.6735	158.635	186.941	159.61	0.950306	2.6359	2.81223	2.76462	150.215	2.29077	65.5742	58.7334	-6.02675	0.51635	-11.6718	1.77588e-31	3.23118e-29
Elovl2	758.757	582.418	615.564	538.025	1946.23	1948.81	1713.59	1824.65	623.691	1858.32	0.335621	1343.58	1.57421	0.135159	11.647	2.37607e-31	4.24995e-29
Hsd11b1	4956.08	3959.08	5743.54	4845.39	1123.26	1135.2	1336.75	1665.22	4876.02	1315.11	3.7077	3009.37	-1.89061	0.162585	-11.6284	2.95657e-31	5.24382e-29
Them7	4764.73	4107.52	4389.51	3900.41	1794.18	1802.08	1704.21	1658.77	4290.54	1739.81	2.4661	2959.49	-1.30233	0.112032	-11.6246	3.09002e-31	5.43484e-29
Slc5a8	15296.4	11482.9	12701.7	12077.5	4837.06	4648.85	3171.26	3349.8	12889.6	4001.74	3.22101	8569.4	-1.68753	0.145564	-11.5931	4.46705e-31	7.79187e-29
Ceacam2	404.481	395.455	302.618	271.655	1404.55	1273.14	1213.01	1256.98	343.552	1286.92	0.266957	807.394	1.90509	0.165149	11.5356	8.72531e-31	1.50948e-28
Gsta2	2646.65	1630.54	1736.18	1559.11	6540.01	7440.27	6015.37	7129.96	1893.12	6781.4	0.279164	4314.19	1.84043	0.15967	11.5264	9.70711e-31	1.66568e-28
Gm41713	12.3144	22.6622	10.3283	16.9124	157.751	167.819	145.299	192.602	15.5543	165.868	0.0937754	90.478	3.42789	0.29788	11.5076	1.20767e-30	2.05557e-28
Tmprss6	5.68357	16.9966	8.2626	5.28511	121.639	158.154	176.233	124.408	9.05698	145.109	0.0624152	79.7167	4.02741	0.351198	11.4676	1.91849e-30	3.23934e-28
Eri2	724.656	462.309	459.607	451.349	141.596	163.426	121.863	158.505	524.48	146.347	3.5838	296.669	-1.84216	0.160757	-11.4593	2.11332e-30	3.53997e-28
Slc7a12	150.615	79.3177	47.51	60.2503	7430.44	7676.63	5276.69	6008.44	84.4232	6598.05	0.0127952	3428.66	6.2871	0.54889	11.4542	2.24024e-30	3.72304e-28
Gm34861	153.456	169.966	146.661	132.128	35.1613	36.024	27.1849	27.6462	150.553	31.5041	4.77884	82.2757	-2.25471	0.197564	-11.4125	3.62033e-30	5.96959e-28
Dgkg	761.599	682.132	676.5	673.324	215.72	231.081	278.411	231.307	698.389	239.13	2.92055	426.685	-1.54668	0.135908	-11.3803	5.23921e-30	8.572e-28
Lyplal1	1222.92	787.511	926.444	821.307	3137.91	3270.28	2749.43	3178.39	939.544	3084	0.304651	2051.12	1.71402	0.151042	11.348	7.59216e-30	1.23262e-27
Hao2	10602.7	5429.86	5161.03	6063.08	27474.3	29927.2	26196.9	31038.4	6814.17	28659.2	0.237766	19260.9	2.07228	0.185104	11.1952	4.30487e-29	6.93578e-27
Cndp1	2107.66	2130.25	2162.74	2221.86	962.66	940.138	786.488	726.174	2155.63	853.865	2.52455	1620.82	-1.33595	0.11977	-11.1543	6.82185e-29	1.09077e-26
C1qtnf3	5002.49	3810.65	4812.96	4396.16	1546.15	1352.22	1356.43	1327.94	4505.57	1395.68	3.22821	3113.43	-1.69087	0.152072	-11.1189	1.01529e-28	1.61119e-26
Pank1	15279.3	11076.1	13301.8	12216	5079.39	5158.46	3679.34	3850.19	12968.3	4441.85	2.91958	8793.46	-1.54578	0.139631	-11.0705	1.74393e-28	2.74681e-26
Anxa13	424.374	351.264	447.213	398.498	100.732	101.922	102.178	108.742	405.337	103.393	3.92034	292.478	-1.97152	0.178309	-11.0568	2.03224e-28	3.17722e-26
Ugt1a7c	7319.5	5740.33	6249.62	6455.24	2600.99	2888.07	2501.95	2729.6	6441.17	2680.15	2.40329	4466.68	-1.26505	0.114495	-11.0489	2.21819e-28	3.44244e-26
Rnf180	229.237	158.635	327.406	293.852	55.1178	37.7813	35.6216	43.3124	252.283	42.9583	5.87274	123.178	-2.55635	0.231499	-11.0426	2.37954e-28	3.66588e-26
Ces2h	133.564	166.567	173.515	120.501	27.5589	21.9659	36.559	21.1954	148.537	26.8198	5.53832	85.7932	-2.47145	0.224087	-11.029	2.76895e-28	4.23488e-26
Cyp4a12a	1381.11	1798.24	2234	1601.39	11.4037	14.0581	12.1863	27.6462	1753.69	16.3236	107.433	907.871	-6.7469	0.613254	-11.0018	3.74548e-28	5.68721e-26
Eva1c	25.5761	29.4608	27.8863	20.0834	204.316	196.814	171.546	121.643	25.7517	173.58	0.148356	102.785	2.75456	0.250697	10.9876	4.38497e-28	6.61066e-26
Gm10639	78.6228	58.9217	47.51	57.0792	555.929	643.16	341.218	377.831	60.5334	479.535	0.126234	294.788	2.98374	0.272554	10.9473	6.84478e-28	1.02458e-25
Sdc2	4297.73	3286.02	3891.68	3635.1	1721	1592.96	1498.92	1800.69	3777.63	1653.39	2.28477	2704.51	-1.19229	0.109126	-10.9259	8.67102e-28	1.28881e-25
Ugt2b37	5488.44	3041.27	4664.24	4246.06	54.1675	56.2326	19.6856	30.4108	4360	40.1241	108.663	1983.53	-6.76337	0.62314	-10.8537	1.91549e-27	2.80752e-25
Dcst1	180.927	213.025	275.764	219.861	66.5214	39.5385	35.6216	51.6062	222.394	48.322	4.60234	126.046	-2.20408	0.204472	-10.7794	4.3072e-27	6.26949e-25
Fkbp5	2209.02	2304.74	3101.57	3112.93	704.177	658.097	853.044	902.188	2682.07	779.376	3.4413	2008.44	-1.78302	0.165526	-10.7718	4.67575e-27	6.75934e-25
Ccdc6	3820.31	4686.54	4641.52	4041	2007.05	2063.91	2097.93	1967.49	4297.34	2034.09	2.11266	3233.06	-1.0789	0.100209	-10.7665	4.95292e-27	7.11132e-25
Ttc39c	1428.47	1228.29	1551.3	1491.46	603.444	589.563	529.637	615.589	1424.88	584.559	2.43753	996.276	-1.28563	0.11951	-10.7575	5.46255e-27	7.79004e-25
Cd36	25626.3	15277.7	20934.3	18997.9	4891.23	5228.75	5012.34	5818.6	20209.1	5237.73	3.85836	12602.1	-1.94801	0.181257	-10.7472	6.10807e-27	8.65215e-25
0610031O16Rik	115.566	88.3825	140.464	107.816	11.4037	2.6359	7.49929	2.76462	113.057	6.07587	18.6076	52.4526	-4.2333	0.395764	-10.6965	1.05676e-26	1.48693e-24
Ces2c	4391.51	3352.87	4176.74	4049.45	1065.29	1059.63	866.168	822.935	3992.64	953.507	4.18732	2651.2	-2.06606	0.193281	-10.6894	1.14069e-26	1.5944e-24
Cyp2d9	4516.55	5820.78	5602.04	6057.8	433.34	539.481	270.912	229.463	5499.29	368.299	14.9316	3065.45	-3.90014	0.366452	-10.643	1.88017e-26	2.59365e-24
Hsd17b2	411.112	348.998	420.36	384.756	113.086	127.402	97.4908	77.4094	391.306	103.847	3.7681	246.592	-1.91351	0.179893	-10.6369	2.00684e-26	2.75041e-24
Ston2	1238.07	1535.36	1343.71	1402.67	3306.12	3669.18	3209.7	2830.97	1379.95	3253.99	0.42408	2324.73	1.23804	0.116418	10.6345	2.06037e-26	2.80556e-24
Nat8	2765.06	3080.92	3987.74	3511.43	1017.78	1095.66	778.051	816.485	3336.29	926.993	3.59904	2264.84	-1.84748	0.175065	-10.5531	4.9126e-26	6.60417e-24
Hpd	1275.96	1669.07	1900.4	1860.36	7435.2	6345.5	6087.55	5273.05	1676.45	6285.32	0.266724	3372.76	1.90673	0.181175	10.5242	6.68098e-26	8.92461e-24
Inmt	20225	19939.3	22757.3	22572.7	6228.31	6397.33	4342.09	3886.13	21373.6	5213.47	4.09969	14049.8	-2.0355	0.195603	-10.4063	2.32126e-25	3.08129e-23
Cbs	4665.27	7617.89	8193.4	7627.48	2293.09	2512.01	2543.2	1942.61	7026.01	2322.73	3.0249	4949.68	-1.59678	0.154057	-10.3649	3.5813e-25	4.66586e-23
Clip4	718.025	724.057	815.932	838.219	311.7	321.58	377.777	303.187	774.058	328.561	2.3559	528.381	-1.23635	0.119277	-10.3654	3.5625e-25	4.66586e-23
Slc22a2	8794.38	7965.76	8581.74	7757.49	3549.39	3799.21	3399.05	2837.42	8274.84	3396.27	2.43645	6122.99	-1.28479	0.124058	-10.3564	3.91575e-25	5.03938e-23
Acot3	444.266	295.742	408.999	473.546	2256.03	1903.12	1262.69	1320.57	405.638	1685.6	0.240649	1049.16	2.05429	0.198565	10.3456	4.3799e-25	5.60255e-23
Aldh3a2	11571.8	8698.88	9750.9	9277.49	4411.32	4664.67	4224.91	4535.82	9824.76	4459.18	2.20327	7392.16	-1.13971	0.110963	-10.2711	9.51537e-25	1.20983e-22
Spp2	4610.33	3959.08	4632.22	4728.06	9678.87	9836.31	8644.81	8531.62	4482.42	9172.9	0.488659	7093.72	1.033	0.100981	10.2297	1.46017e-24	1.84541e-22
Myom3	136.406	129.174	144.596	113.101	21.857	21.0872	27.1849	11.98	130.819	20.5273	6.37294	70.8153	-2.67363	0.262092	-10.2011	1.96027e-24	2.46271e-22
Fbp2	402.586	364.861	414.163	397.441	784.953	884.785	838.983	900.345	394.763	852.266	0.463192	652.965	1.10981	0.109433	10.1415	3.61501e-24	4.5147e-22
Nap1l5	201.767	148.437	198.302	195.549	433.34	447.225	405.899	401.792	186.014	422.064	0.440725	292.529	1.17884	0.116572	10.1125	4.86109e-24	6.03519e-22
Macrod2	6414.86	4270.69	5463.64	5200.55	2216.11	2199.22	1891.7	2257.77	5337.44	2141.2	2.49273	3813.38	-1.31786	0.130421	-10.1047	5.26607e-24	6.49975e-22
Aadat	10984.5	7257.57	8277.06	7309.31	28773.4	29938.6	23024.7	30397	8457.1	28033.4	0.301679	19593.4	1.72885	0.171114	10.1035	5.33048e-24	6.54099e-22
Gm39133	60.6248	78.1845	126.005	87.7329	11.4037	12.3009	5.62447	3.68616	88.1367	8.25379	10.6783	45.5807	-3.41118	0.338745	-10.0701	7.49206e-24	9.14031e-22
Msrb1	3462.24	3128.52	3912.34	3720.72	1559.45	1641.29	1662.97	1484.6	3555.96	1587.08	2.24057	2764.57	-1.16391	0.115872	-10.0448	9.67968e-24	1.17413e-21
Nat8f5	618.562	633.408	1012.17	903.755	161.552	192.421	104.99	181.543	791.973	160.127	4.94592	632.994	-2.30563	0.229817	-10.0324	1.09779e-23	1.324e-21
LOC108167577	156.298	84.9832	106.381	108.873	2.85092	0	0.937411	1.84308	114.134	1.40785	81.0695	55.848	-6.36912	0.636417	-10.0078	1.40878e-23	1.68942e-21
Gm34472	167.665	189.229	319.143	230.431	48.4656	48.3249	48.7454	57.1355	226.617	50.6678	4.4726	139.509	-2.16087	0.215942	-10.0067	1.42405e-23	1.69808e-21
Mfsd7c	550.359	490.636	557.726	544.367	1622.17	1482.26	1201.76	1032.12	535.772	1334.58	0.401454	963.411	1.31629	0.131661	9.99762	1.56097e-23	1.85088e-21
Hykk	11880.6	11816.1	11264	10320.8	5467.11	5347.37	4529.57	4194.85	11320.3	4884.73	2.3175	8268.3	-1.21256	0.121415	-9.98696	1.73833e-23	2.04967e-21
Slc6a4	149.667	139.372	129.103	143.755	418.135	403.293	322.469	315.167	140.475	364.766	0.385109	250.339	1.37606	0.137823	9.98424	1.78659e-23	2.09488e-21
Zfp385b	119.355	100.847	120.841	90.904	261.334	270.619	277.474	315.167	107.987	281.148	0.384091	189.188	1.37749	0.138152	9.97082	2.0453e-23	2.38498e-21
Gm29012	100.41	105.379	87.7901	93.018	28.5092	19.3299	14.0612	12.9016	96.6493	18.7005	5.16828	59.3098	-2.37166	0.238701	-9.93572	2.91056e-23	3.37529e-21
Foxq1	91.8844	134.84	114.644	121.558	544.525	409.443	470.58	466.299	115.731	472.712	0.244824	300.508	2.0325	0.20476	9.92627	3.20006e-23	3.67068e-21
Tmigd1	8278.13	4960.75	6265.12	6169.84	1623.12	1895.21	1367.68	1793.32	6418.46	1669.83	3.84377	4370.81	-1.94254	0.195719	-9.92515	3.23606e-23	3.6919e-21
Ctnna2	78.6228	71.3859	101.217	57.0792	2.85092	7.90771	5.62447	4.6077	77.0762	5.2477	14.6876	49.2314	-3.86733	0.389815	-9.92095	3.37523e-23	3.82998e-21
Cckar	3706.64	3567.03	3832.81	3383.53	1610.77	1512.13	1261.76	1062.54	3622.5	1361.8	2.66009	2602.35	-1.41149	0.142545	-9.90207	4.07756e-23	4.60219e-21
Gm41784	67.2556	81.5839	70.2321	70.8205	4.75153	3.51454	2.81223	2.76462	72.473	3.46073	20.9415	36.1373	-4.38912	0.443357	-9.89973	4.17388e-23	4.68585e-21
Gm39079	5273.41	4118.85	4715.88	4360.22	2163.85	2080.61	1903.88	2301.09	4617.09	2112.36	2.18575	3331.99	-1.12828	0.114128	-9.88607	4.78452e-23	5.34296e-21
Sucnr1	1617.92	1022.06	1347.84	1085.56	412.433	478.856	362.778	433.124	1268.35	421.798	3.007	797.883	-1.58858	0.160825	-9.8777	5.20129e-23	5.77781e-21
Aldh1b1	44.5213	50.9899	56.8054	60.2503	192.912	194.178	223.104	154.819	53.1417	191.253	0.277861	135.428	1.8497	0.187295	9.87587	5.29705e-23	5.85338e-21
Scg2	0	0	0	0	0	0.878634	967.408	1216.43	0	546.18	0	136.84	26.3058	2.66662	9.86486	5.91196e-23	6.49885e-21
Slc7a13	33548.2	20416.4	26573.6	24832.6	74.1239	43.9317	56.2447	76.4878	26342.7	62.697	420.159	13728.7	-8.71491	0.88423	-9.85593	6.46145e-23	7.02966e-21
Mgll	1089.35	1365.4	1394.31	1296.97	2618.09	2866.98	2976.28	2249.48	1286.51	2677.71	0.480451	2194.73	1.05805	0.107444	9.84746	7.02982e-23	7.60449e-21
Gsto1	775.808	576.753	628.99	568.678	1590.81	1698.4	1320.81	1350.06	637.557	1490.02	0.427885	1077.55	1.22368	0.124703	9.81273	9.92463e-23	1.0633e-20
Selenbp2	338.173	378.459	462.706	430.208	129.242	122.13	132.175	93.9971	402.386	119.386	3.37047	274.121	-1.75292	0.178752	-9.80644	1.0563e-22	1.12597e-20
Igf2bp1	161.035	218.69	227.222	172.295	45.6147	60.6258	48.7454	46.077	194.81	50.2657	3.87561	146.078	-1.95105	0.199323	-9.78836	1.26323e-22	1.33978e-20
Il5ra	270.917	139.372	167.318	209.291	24.708	25.4804	28.1223	57.1355	196.724	33.8615	5.80967	110.938	-2.54056	0.259846	-9.77715	1.41125e-22	1.48929e-20
Fzd3	311.649	302.54	262.338	262.142	516.967	583.413	559.635	650.607	284.667	577.655	0.492798	439.157	1.02074	0.104503	9.76758	1.55113e-22	1.62876e-20
Cmtm6	9569.24	7988.42	9738.51	8632.71	4325.79	4394.05	3973.69	3732.24	8982.22	4106.44	2.18735	6665.94	-1.12922	0.115984	-9.73607	2.11581e-22	2.19982e-20
Angptl7	336.278	582.418	744.667	693.407	122.59	173.091	134.05	152.054	589.193	145.446	4.05093	378.522	-2.01685	0.208818	-9.65844	4.52727e-22	4.68395e-20
Mgat4a	1368.79	997.136	1022.5	977.746	2538.27	2498.84	2241.35	2443	1091.54	2430.36	0.449127	1784.77	1.15404	0.11996	9.62023	6.56812e-22	6.69694e-20
Odc1	29965.7	21711.5	35226.6	29915.9	7228.03	8509.57	8412.33	9513.98	29204.9	8415.98	3.47017	19317.9	-1.79501	0.186799	-9.6093	7.30437e-22	7.41182e-20
Cyp4f14	49.2576	65.7203	46.4771	49.6801	226.173	188.906	194.044	146.525	52.7838	188.912	0.279409	116.545	1.84365	0.192107	9.597	8.23036e-22	8.31149e-20
Ogdhl	186.611	200.56	250.976	253.686	570.184	668.641	625.253	513.298	222.958	594.344	0.375133	456.151	1.41525	0.147739	9.57942	9.75907e-22	9.80833e-20
Cyp2d26	3161.01	3759.66	3809.06	3547.37	7466.56	7905.95	7584.59	6084.01	3569.27	7260.28	0.491617	5699.1	1.02454	0.106966	9.57821	9.87443e-22	9.87724e-20
Adrb2	341.014	368.261	508.15	471.432	120.689	130.038	153.735	139.153	422.214	135.904	3.10672	285.359	-1.63524	0.171127	-9.5557	1.22757e-21	1.22212e-19
2310015A16Rik	31.2597	32.8602	27.8863	30.6537	192.912	227.566	109.677	144.682	30.6649	168.709	0.181762	101.842	2.46137	0.258011	9.53978	1.43137e-21	1.41833e-19
Fhl1	4752.42	4882.57	5199.24	4710.09	2289.29	2124.54	2393.21	2261.46	4886.08	2267.12	2.15519	3808.65	-1.10785	0.116821	-9.48333	2.46301e-21	2.39559e-19
Fabp1	31.2597	49.8568	15.4924	21.1405	233.775	199.45	134.987	178.779	29.4373	186.748	0.157631	95.7728	2.67273	0.283625	9.42347	4.3644e-21	4.18704e-19
2210011C24Rik	148.72	117.843	155.957	127.9	28.5092	51.8394	39.3713	44.2339	137.605	40.9884	3.35716	89.1345	-1.74506	0.18534	-9.41545	4.71055e-21	4.49868e-19
Spp1	23166.2	14375.8	15239.3	15635.5	50401.4	51771.8	46571.5	50003.7	17104.2	49687.1	0.344238	32564.6	1.53848	0.163567	9.40583	5.16207e-21	4.90768e-19
Spidr	401.639	273.079	352.193	335.076	979.766	789.892	898.977	1302.14	340.497	992.693	0.343003	622.75	1.54222	0.165107	9.34077	9.56374e-21	9.05167e-19
Cyb5a	26628.5	17763.8	22332.8	20661.6	9293.04	9712.42	7781.45	9644.84	21846.7	9107.94	2.39864	15531.4	-1.26224	0.135895	-9.28834	1.56708e-20	1.46999e-18
Tmprss9	72.9392	193.762	190.04	221.975	16.1552	8.78634	18.7482	1.84308	169.679	11.3832	14.9061	77.6858	-3.90161	0.421273	-9.26147	2.01633e-20	1.88304e-18
Trdn	108.935	75.9183	141.497	95.1321	15.2049	14.0581	5.62447	5.52924	105.371	10.1042	10.4284	91.5844	-3.38165	0.365166	-9.26057	2.03348e-20	1.89069e-18
Tmem56	2197.65	1619.21	1794.02	1859.3	873.331	944.532	838.983	1006.32	1867.55	915.792	2.03927	1363.03	-1.0284	0.111093	-9.25707	2.10123e-20	1.93662e-18
Tmem26	916.003	728.589	855.179	644.784	336.408	277.648	341.218	367.695	786.139	330.742	2.37689	545.341	-1.25025	0.135533	-9.2247	2.84348e-20	2.58683e-18
Tm6sf2	62.5193	64.5872	66.1008	63.4214	217.62	236.353	201.543	164.034	64.1572	204.888	0.313134	133.079	1.67589	0.181928	9.21184	3.20569e-20	2.90383e-18
LOC328448	1292.07	1178.43	1099.96	1361.45	207.167	205.6	341.218	339.127	1232.98	273.278	4.5118	738.397	-2.17392	0.236741	-9.18269	4.2047e-20	3.7925e-18
Slc46a3	1059.04	993.737	1044.19	966.119	509.364	492.914	502.452	514.219	1015.77	504.737	2.01247	838.221	-1.00926	0.110094	-9.16726	4.85184e-20	4.35758e-18
Cadm1	1149.98	1018.67	1050.38	1030.6	579.687	493.792	353.404	422.987	1062.41	462.468	2.29725	796.67	-1.20019	0.130979	-9.16327	5.03463e-20	4.50188e-18
Scd1	12236.7	9666.56	6954.01	8166.56	47329.1	73916.8	35922.5	33308.1	9255.97	47619.1	0.194375	27902.8	2.36307	0.257898	9.16283	5.05518e-20	4.50188e-18
Dio1	428.163	298.008	327.406	307.594	2069.77	1928.6	1386.43	1398.9	340.292	1695.92	0.200653	1147.07	2.31661	0.253353	9.14383	6.02801e-20	5.34568e-18
Acot7	250.077	422.65	426.557	364.673	1410.25	1121.14	1641.41	1237.63	365.989	1352.61	0.270581	867.723	1.88679	0.206678	9.12912	6.9056e-20	6.09831e-18
9030619P08Rik	390.272	231.154	276.797	299.137	1541.4	1624.59	1165.2	1487.37	299.34	1454.64	0.205783	860.83	2.27988	0.250216	9.11161	8.11682e-20	7.13807e-18
Sh3bp2	512.469	713.859	639.319	796.995	217.62	180.999	182.795	153.897	665.66	183.828	3.62111	432.637	-1.85626	0.204043	-9.09739	9.2531e-20	8.10356e-18
Mettl7a3	17.0507	15.8635	27.8863	16.9124	185.31	154.64	130.3	124.408	19.4282	148.664	0.130685	96.386	2.93423	0.323012	9.08397	1.04683e-19	9.12995e-18
Nt5e	5596.43	3632.75	4577.48	4275.66	1617.42	1737.06	1783.89	1896.53	4520.58	1758.73	2.57037	3315.88	-1.36212	0.150085	-9.07565	1.13003e-19	9.81496e-18
LOC102638797	192.294	149.57	131.169	128.957	506.513	428.773	486.516	531.729	150.498	488.383	0.308155	321.636	1.69625	0.186941	9.07373	1.15013e-19	9.94864e-18
Ppt2	2236.49	3435.59	3668.59	3407.84	1455.87	1425.14	1363	1050.56	3187.13	1323.64	2.40785	2417.67	-1.26753	0.140085	-9.04834	1.45162e-19	1.25052e-17
Gm10845	128.828	97.4474	102.25	106.759	15.2049	21.0872	21.5605	27.6462	108.821	21.3747	5.09111	58.0933	-2.34828	0.26112	-8.99309	2.40371e-19	2.0623e-17
Gm1653	63.4666	66.8535	90.8886	75.0486	1.90061	1.75727	9.37411	4.6077	74.0643	4.40992	16.7949	41.3291	-4.07768	0.45439	-8.97396	2.86028e-19	2.43424e-17
Wfdc16	68.2029	54.3893	57.8382	65.5354	245.179	214.387	230.603	198.131	61.4914	222.075	0.276895	130.15	1.84995	0.206256	8.96921	2.98646e-19	2.52129e-17
Cpn1	1020.2	1279.28	1382.95	1337.13	3197.78	3336.17	3012.84	2184.05	1254.89	2932.71	0.427895	2104.3	1.225	0.136741	8.95856	3.28933e-19	2.76592e-17
Tmem178	1428.47	1144.44	1315.82	1254.69	628.152	633.495	510.889	563.983	1285.85	584.13	2.20132	980.354	-1.13862	0.12754	-8.92752	4.35649e-19	3.64874e-17
Dsg2	351.434	353.53	332.57	307.594	937.952	1014.82	752.741	695.763	336.282	850.32	0.395477	579.338	1.33844	0.150547	8.89051	6.08275e-19	5.07441e-17
Col6a6	145.878	149.57	189.007	127.9	33.2607	24.6018	44.0583	20.2739	153.089	30.5487	5.01131	80.6938	-2.32801	0.26277	-8.85952	8.03593e-19	6.67742e-17
Pla2g5	237.763	236.82	179.712	182.865	460.899	444.589	442.458	415.615	209.29	440.89	0.474698	315.239	1.07461	0.121477	8.8462	9.05519e-19	7.46558e-17
Fam25c	25.5761	36.2595	20.6565	48.6231	301.247	232.838	211.855	134.545	32.7788	220.121	0.148912	132.209	2.75158	0.311846	8.82353	1.1091e-18	9.10839e-17
Cyp11b1	0	0	0	0	0	0	3796.52	3919.31	0	1928.96	0	482.239	37.0787	4.20613	8.81538	1.19275e-18	9.75747e-17
Adamts8	40.7323	28.3277	48.5428	30.6537	142.546	196.814	184.67	144.682	37.0641	167.178	0.221705	107.379	2.16876	0.246303	8.80527	1.30534e-18	1.06373e-16
Gm36488	85.2536	129.174	98.1184	80.3337	0	0.878634	1.87482	1.84308	98.2201	1.14913	85.4731	44.7153	-6.4136	0.73144	-8.76845	1.81142e-18	1.47045e-16
Bco2	808.015	585.818	655.844	654.297	372.52	336.517	325.282	314.245	675.993	337.141	2.00508	494.522	-1.00522	0.115179	-8.72745	2.60472e-18	2.09607e-16
Smlr1	328.7	288.943	319.143	294.909	160.602	150.246	129.363	144.682	307.924	146.223	2.10585	250.494	-1.07552	0.123239	-8.72714	2.61189e-18	2.09607e-16
Slc17a3	29294.1	20096.8	24287.9	20271.6	8153.63	7850.6	7774.89	9830.07	23487.6	8402.3	2.79538	16199.3	-1.48307	0.170077	-8.71995	2.78313e-18	2.22503e-16
Gm40105	2.84179	2.26622	1.03283	1.05702	59.8693	62.383	72.1807	94.9186	1.79946	72.3379	0.0248758	31.8373	5.31669	0.609929	8.7169	2.85931e-18	2.27731e-16
Asxl3	312.597	399.988	241.681	282.225	76.9748	77.3198	94.6785	90.3109	309.123	84.821	3.64441	204.285	-1.8652	0.214389	-8.70004	3.31754e-18	2.63233e-16
Pecr	8222.24	7248.5	8391.7	7372.74	3528.49	3688.51	3079.4	3133.24	7808.79	3357.41	2.32584	5818.48	-1.21776	0.140058	-8.69471	3.47708e-18	2.74859e-16
Itih1	264.286	231.154	200.368	205.062	96.9312	77.3198	69.3684	57.1355	225.218	75.1887	2.99537	148.952	-1.58434	0.182337	-8.68909	3.65344e-18	2.87722e-16
Hunk	539.94	601.681	639.319	484.117	262.285	283.799	291.535	238.679	566.264	269.074	2.10449	412.183	-1.07301	0.123554	-8.68455	3.80231e-18	2.98333e-16
Angptl3	279.442	191.495	192.105	170.181	551.178	597.471	602.755	696.684	208.306	612.022	0.340357	426.624	1.55269	0.179082	8.67027	4.3109e-18	3.34642e-16
Dnajc22	2498.88	2500.77	3046.83	2771.51	1453.97	1532.34	1194.26	1071.75	2704.5	1313.08	2.05966	2254.41	-1.0423	0.120386	-8.65799	4.80151e-18	3.71211e-16
Socs2	366.591	265.148	245.812	239.944	817.263	758.261	740.555	701.292	279.374	754.343	0.370354	570.583	1.43133	0.165522	8.64737	5.26998e-18	4.05942e-16
Kyat3	2017.67	1352.93	1464.55	1461.86	3733.75	4193.72	3158.14	4113.76	1574.25	3799.84	0.414294	2767.1	1.27087	0.147012	8.6447	5.39477e-18	4.14043e-16
Hmgcs2	328.7	217.557	235.484	260.028	1692.5	1730.91	829.609	672.724	260.442	1231.43	0.211495	1053.04	2.24055	0.259653	8.62899	6.18978e-18	4.73339e-16
Tenm4	238.71	387.523	287.125	336.133	1187.88	1345.19	954.285	732.624	312.373	1055	0.29609	715.477	1.75728	0.203691	8.62719	6.28799e-18	4.79113e-16
Dnph1	448.055	438.513	575.284	571.849	236.626	248.653	229.666	194.445	508.425	227.348	2.23633	386.13	-1.16092	0.13464	-8.62237	6.55802e-18	4.97891e-16
Gm15638	764.441	499.701	610.4	617.301	258.483	207.358	271.849	302.265	622.961	259.989	2.39611	442.463	-1.26245	0.146479	-8.61864	6.77545e-18	5.12554e-16
Kcnk5	4933.34	6868.91	6857.96	7291.34	2545.87	2262.48	2807.55	3065.04	6487.89	2670.24	2.42971	4747.15	-1.28074	0.148847	-8.60442	7.67006e-18	5.78158e-16
Etnppl	593.933	540.493	560.824	594.047	269.887	286.435	194.982	187.994	572.324	234.824	2.43724	420.646	-1.28495	0.149511	-8.59436	8.37337e-18	6.28927e-16
G630018N14Rik	2.84179	3.39933	1.03283	2.11405	70.3227	43.0531	50.6202	73.7232	2.347	59.4298	0.0394919	32.9484	4.66715	0.545673	8.55302	1.19907e-17	8.9426e-16
Dfnb59	2.84179	3.39933	11.3611	12.6843	57.0184	72.9266	59.9943	67.2724	7.57162	64.3029	0.117749	38.1915	3.0926	0.362167	8.53914	1.35221e-17	1.00492e-15
Nudt19	19200.1	12788.3	18248	16544.5	6234.96	6151.32	4322.4	5634.3	16695.2	5585.74	2.98889	12540.3	-1.57963	0.185155	-8.53138	1.44613e-17	1.07095e-15
Lrp8	67.2556	64.5872	65.068	57.0792	263.235	228.445	204.356	181.543	63.4975	219.395	0.289421	138.795	1.78792	0.20965	8.52814	1.48724e-17	1.09754e-15
Rdh19	1.89452	2.26622	4.1313	3.17107	51.3165	40.4172	74.9929	86.6248	2.86578	63.3378	0.0452459	32.8811	4.46937	0.527211	8.47739	2.30309e-17	1.68197e-15
Atp13a4	0	0	3.09848	0	121.639	101.043	114.364	117.957	0.774619	113.751	0.00680978	59.8233	7.18982	0.84825	8.47606	2.32946e-17	1.69536e-15
Pcolce2	45.4686	50.9899	54.7397	40.1669	182.459	195.935	141.549	136.388	47.8413	164.083	0.291568	109.432	1.7796	0.210373	8.45928	2.6903e-17	1.95125e-15
Gm35925	26.5233	11.3311	16.5252	21.1405	166.304	190.664	177.171	208.268	18.88	185.601	0.101723	95.2533	3.28935	0.38902	8.45548	2.7795e-17	2.00904e-15
Gm4208	219.765	208.492	222.057	237.83	48.4656	45.689	30.9346	45.1555	222.036	42.5612	5.21687	147.468	-2.38292	0.282771	-8.42703	3.54552e-17	2.5453e-15
Gm30571	62.5193	39.6588	56.8054	56.0222	238.527	233.717	132.175	154.819	53.7514	189.809	0.283186	127.205	1.81556	0.216328	8.39265	4.7532e-17	3.37781e-15
Gm6135	17.0507	6.79866	14.4596	17.9694	74.1239	88.742	82.4922	110.585	14.0696	88.9857	0.158111	49.1304	2.64905	0.316108	8.38021	5.28355e-17	3.7421e-15
Ftcd	273.759	484.971	403.835	364.673	68.422	101.922	129.363	72.8017	381.809	93.127	4.09988	269.802	-2.03433	0.24277	-8.37965	5.30862e-17	3.74728e-15
Abcc4	1641.61	1788.05	1642.19	1722.95	4852.26	5798.11	3688.71	3448.4	1698.7	4446.87	0.381998	3026.58	1.38847	0.166097	8.3594	6.30377e-17	4.40554e-15
4930502E18Rik	53.994	32.8602	64.0352	58.1363	1.90061	4.39317	1.87482	3.68616	52.2564	2.96369	17.6322	29.761	-4.1311	0.494408	-8.35565	6.50724e-17	4.53274e-15
Adh1	12472.6	13346.9	16833	14155.7	3399.25	3712.23	6266.59	5814	14202	4798.02	2.95998	9452.61	-1.5656	0.18744	-8.35252	6.68214e-17	4.63925e-15
1700034H15Rik	14.2089	15.8635	17.558	12.6843	88.3785	52.718	74.9929	81.0955	15.0787	74.2962	0.202954	47.4912	2.30032	0.275793	8.34075	7.3823e-17	5.10855e-15
Akr1c18	550.359	359.196	338.767	334.019	3284.26	3021.62	2958.47	3684.32	395.585	3237.17	0.122201	2208.28	3.03234	0.363861	8.33378	7.83013e-17	5.40074e-15
Slc22a6	17847.4	27455.2	28320.1	27043.9	9387.12	10078.8	7519.91	4786.48	25166.7	7943.08	3.16837	17829.3	-1.66372	0.200052	-8.31645	9.06347e-17	6.19073e-15
Setd4	77.6755	90.6488	74.3634	83.5048	179.608	171.334	195.919	199.053	81.5481	186.478	0.437306	143.262	1.19578	0.144127	8.29674	1.0701e-16	7.26225e-15
Wwp1	13291	9213.31	9952.3	9627.36	4987.21	5165.49	4636.44	5521.87	10521	5077.75	2.07198	7837.93	-1.05108	0.127213	-8.26237	1.4281e-16	9.56873e-15
Akr1c20	8.52536	12.4642	8.2626	2.11405	89.3288	47.4462	59.0569	82.0171	7.84155	69.4623	0.112889	37.7324	3.1528	0.382812	8.23591	1.78194e-16	1.18269e-14
Gm41308	111.777	123.509	87.7901	112.044	14.2546	7.90771	27.1849	26.7247	108.78	19.018	5.71986	59.0268	-2.51982	0.305955	-8.23593	1.78174e-16	1.18269e-14
Akr1c19	712.341	413.585	465.804	515.827	1238.25	1370.67	1067.71	1465.25	526.889	1285.47	0.409881	931.637	1.28532	0.156171	8.23018	1.86931e-16	1.23679e-14
Tbx10	47.3631	106.512	111.545	94.075	19.0061	14.9368	10.3115	10.1369	89.8739	13.5978	6.60942	49.442	-2.72201	0.331879	-8.20181	2.36802e-16	1.55699e-14
Clic6	4.73631	2.26622	5.16413	4.22809	113.086	139.703	35.6216	48.8416	4.09869	84.3131	0.0486127	64.7181	4.35094	0.533417	8.15673	3.44209e-16	2.24224e-14
Gm6614	54.9412	44.1913	41.313	61.3073	6.65214	1.75727	4.68706	0.92154	50.4382	3.5045	14.3924	23.2448	-3.86464	0.474387	-8.1466	3.74314e-16	2.43085e-14
B3galnt1	681.082	440.78	530.872	421.752	1326.63	1287.2	1058.34	1223.81	518.621	1223.99	0.423713	882.489	1.23746	0.152594	8.10953	5.08165e-16	3.26992e-14
7530428D23Rik	77.6755	36.2595	53.7069	61.3073	1.90061	4.39317	0	0	57.2373	1.57345	36.377	22.4401	-5.15872	0.637581	-8.09109	5.91317e-16	3.79342e-14
Gm34996	48.3104	58.9217	60.9367	62.3644	15.2049	7.02907	8.4367	9.2154	57.6333	9.97152	5.77979	38.4256	-2.53601	0.314924	-8.05274	8.09579e-16	5.14256e-14
Gm35815	0	0	1.03283	0	84.5773	85.2275	108.74	156.662	0.258206	108.802	0.00237319	60.1063	8.42955	1.04683	8.05247	8.11368e-16	5.14256e-14
Paqr7	1755.28	2252.62	2473.62	2448.07	1134.67	1152.77	917.726	807.269	2232.39	1003.11	2.22548	1752.43	-1.15387	0.143761	-8.02628	1.00473e-15	6.33011e-14
Ptgr1	451.844	385.257	473.034	433.379	210.968	176.605	220.292	210.111	435.879	204.494	2.1315	324.057	-1.09335	0.136312	-8.02091	1.04967e-15	6.59354e-14
Nr1i2	125.039	123.509	153.891	161.725	275.589	293.464	291.535	304.108	141.041	291.174	0.484387	212.07	1.04614	0.131023	7.98441	1.412e-15	8.84324e-14
Gm11827	77.6755	62.321	66.1008	67.6495	6.65214	9.66497	6.56188	20.2739	68.4367	10.7882	6.34365	36.5177	-2.66393	0.334349	-7.96752	1.61891e-15	1.01091e-13
Nhp2	662.136	747.852	986.348	911.154	378.222	426.138	371.215	329.911	826.873	376.371	2.19696	674.268	-1.135	0.1429	-7.94263	1.97941e-15	1.22875e-13
Rrh	5.68357	13.5973	24.7878	16.9124	73.1736	73.8053	74.0555	95.8402	15.2453	79.2186	0.192445	49.129	2.38763	0.301865	7.90957	2.58272e-15	1.59389e-13
Airn	378.905	279.878	284.027	288.567	127.341	104.557	136.862	99.5263	307.844	117.072	2.62954	187.631	-1.39702	0.177086	-7.88896	3.04723e-15	1.86962e-13
Ugt2b34	1810.22	1103.65	1334.41	1403.73	3883.9	3784.28	2825.36	3489.87	1413	3495.85	0.404194	2393.44	1.30645	0.165681	7.88534	3.13673e-15	1.91895e-13
Maats1	4.73631	3.39933	5.16413	10.5702	59.8693	47.4462	60.9317	43.3124	5.9675	52.8899	0.112829	34.31	3.14602	0.399042	7.88392	3.17265e-15	1.93531e-13
5730420D15Rik	5.68357	3.39933	2.06565	3.17107	49.4159	48.3249	41.2461	35.0185	3.57991	43.5014	0.0822941	22.9807	3.58478	0.455222	7.87478	3.41331e-15	2.07105e-13
Galnt1	9214.97	6395.27	7664.59	7117.99	3507.58	3667.42	3270.63	3812.41	7598.21	3564.51	2.13163	5538.18	-1.09203	0.138815	-7.8668	3.63815e-15	2.20019e-13
Mme	5766.93	4146.05	3895.82	3864.48	11157.5	11479.4	8002.68	9654.05	4418.32	10073.4	0.438612	7441.37	1.18886	0.151387	7.85312	4.05812e-15	2.44716e-13
Gsap	942.526	725.19	795.275	731.46	422.886	356.725	244.664	338.205	798.613	340.62	2.34458	544.773	-1.22988	0.156803	-7.84343	4.38403e-15	2.63616e-13
Anks1b	105.146	116.71	136.333	134.242	33.2607	36.024	48.7454	44.2339	123.108	40.566	3.03475	81.6108	-1.60126	0.204232	-7.84041	4.49071e-15	2.69264e-13
Il22ra1	302.177	329.735	308.815	279.054	122.59	120.373	169.671	108.742	304.945	130.344	2.33954	215.353	-1.22655	0.156504	-7.83718	4.60759e-15	2.7549e-13
Ttbk1	229.237	548.425	483.362	493.63	114.037	116.858	117.176	74.6448	438.664	105.679	4.1509	265.616	-2.05249	0.262107	-7.83073	4.85036e-15	2.89185e-13
Acat1	33329.4	22228.2	27139.5	25375.9	12332.1	13410.6	11408.3	13750.3	27018.3	12725.3	2.12319	20179.9	-1.08625	0.138989	-7.81542	5.47805e-15	3.24775e-13
Gm38837	183.769	188.096	139.431	138.47	49.4159	43.0531	37.4965	49.7632	162.442	44.9322	3.61526	102.804	-1.85434	0.23761	-7.80411	5.99206e-15	3.53264e-13
Smim10l2a	140.195	147.304	142.53	193.435	66.5214	61.5044	52.495	44.2339	155.866	56.1887	2.77397	102.417	-1.47123	0.188608	-7.8005	6.16628e-15	3.62522e-13
Csmd1	86.2009	91.7819	97.0856	102.531	239.477	186.27	194.044	232.228	94.3999	213.005	0.443182	154.802	1.17442	0.150661	7.7951	6.4357e-15	3.75226e-13
Nt5c3b	141.142	164.301	165.252	178.637	322.154	330.366	329.031	339.127	162.333	330.17	0.491665	256.521	1.02614	0.131634	7.79535	6.42295e-15	3.75226e-13
AA536875	87.1481	38.5257	59.9039	40.1669	0	0.878634	2.81223	0.92154	56.4361	1.1531	48.9429	28.0385	-5.61979	0.721931	-7.78439	7.00514e-15	4.07302e-13
5830411N06Rik	28.4179	41.925	44.4115	50.7371	0.950306	1.75727	4.68706	0	41.3729	1.84866	22.38	20.2812	-4.4849	0.576352	-7.78152	7.16596e-15	4.15507e-13
LOC108168993	98.5153	75.9183	77.4619	60.2503	0	0	1.87482	0.92154	78.0364	0.699091	111.626	32.9595	-6.82046	0.878179	-7.76659	8.06299e-15	4.64966e-13
Csad	6214.99	8042.81	8550.76	8402.28	4018.85	4554.84	3742.15	2903.77	7802.71	3804.9	2.0507	6379.08	-1.03602	0.133465	-7.76247	8.32904e-15	4.78999e-13
B4galt5	3824.1	5312.02	6492.34	5425.7	2270.28	2340.68	2321.03	1721.44	5263.54	2163.36	2.43304	4032.65	-1.28269	0.165455	-7.7525	9.01004e-15	5.15355e-13
Cyp2c44	626.14	581.285	463.738	465.09	1418.81	1436.57	1290.82	1301.21	534.064	1361.85	0.39216	892.37	1.3503	0.174672	7.73046	1.07161e-14	6.09632e-13
Gm39900	134.511	130.308	104.315	126.843	41.8135	35.1454	40.3087	39.6262	123.994	39.2234	3.16123	66.3111	-1.66185	0.214988	-7.72996	1.07579e-14	6.10364e-13
Stab2	391.219	445.312	375.948	375.243	777.35	812.737	1021.78	770.408	396.931	845.568	0.469425	602.361	1.09152	0.141757	7.69994	1.36135e-14	7.64167e-13
Pzp	3989.87	4096.19	4658.04	4414.13	82.6766	14.9368	5.62447	2.76462	4289.56	26.5006	161.866	2377.88	-7.33968	0.953534	-7.69734	1.38925e-14	7.77757e-13
Hbegf	589.197	534.828	571.152	582.42	242.328	247.775	264.35	254.345	569.399	252.199	2.25773	440.233	-1.17515	0.153008	-7.68033	1.58679e-14	8.85998e-13
Nup62cl	3.78905	5.66555	2.06565	3.17107	71.273	52.718	63.744	50.6847	3.67283	59.6049	0.0616196	32.9007	4.03113	0.525746	7.66746	1.75437e-14	9.74416e-13
Enox1	50.2049	54.3893	56.8054	33.8247	147.297	101.043	149.986	138.231	48.8061	134.139	0.363846	97.7299	1.45728	0.190381	7.65455	1.93993e-14	1.07465e-12
4930434B07Rik	17.998	16.9966	18.5909	9.51321	61.7699	81.713	59.9943	93.0756	15.7747	74.1382	0.212774	45.7592	2.23054	0.292094	7.63639	2.23394e-14	1.23428e-12
Mcoln2	65.3611	61.1879	76.4291	63.4214	313.601	260.076	173.421	208.268	66.5999	238.841	0.278845	159.121	1.84178	0.241367	7.63061	2.33643e-14	1.28754e-12
Tmco3	2795.37	3692.8	4101.35	3872.93	1887.31	1844.25	1932.94	1451.43	3615.61	1778.98	2.03241	2898.84	-1.02307	0.134174	-7.62493	2.44161e-14	1.33851e-12
Serpina1b	160.087	186.963	137.366	164.896	38.9626	4.39317	22.4979	22.117	162.328	21.9926	7.38101	88.8602	-2.88951	0.381031	-7.58339	3.36637e-14	1.84069e-12
Abcb1a	216.923	154.103	152.858	170.181	824.866	700.271	460.269	513.298	173.516	624.676	0.27777	398.61	1.84688	0.244298	7.55994	4.03244e-14	2.19919e-12
Il34	251.025	515.565	579.415	488.345	175.807	166.94	168.734	136.388	458.587	161.967	2.83136	347.499	-1.50045	0.199232	-7.53116	5.02913e-14	2.72866e-12
Dnah9	48.3104	52.123	42.3458	59.1933	13.3043	7.90771	6.56188	10.1369	50.4931	9.4777	5.32757	33.8942	-2.41602	0.321008	-7.52636	5.21726e-14	2.81625e-12
Serpina1d	1706.97	1384.66	1372.62	1310.71	526.47	454.254	239.04	290.285	1443.74	377.512	3.82435	814.994	-1.93526	0.257463	-7.51665	5.61988e-14	3.02585e-12
Tgm7	57.783	46.4575	34.0832	39.1098	6.65214	7.02907	10.3115	3.68616	44.3584	6.91973	6.41043	27.1857	-2.68515	0.357366	-7.51371	5.74753e-14	3.0867e-12
Tmem237	1112.09	891.757	1247.65	1097.19	509.364	530.695	464.956	462.613	1087.17	491.907	2.21012	758.876	-1.14432	0.152484	-7.50451	6.1659e-14	3.30298e-12
Tm4sf4	36.9432	40.7919	51.6413	54.9652	9.50306	8.78634	6.56188	4.6077	46.0854	7.36475	6.25757	32.8606	-2.64374	0.35296	-7.4902	6.87713e-14	3.65998e-12
Hsf2bp	356.171	248.151	374.916	377.357	137.794	148.489	128.425	145.603	339.149	140.078	2.42114	246.233	-1.27645	0.170493	-7.48682	7.05627e-14	3.74195e-12
Mas1	119.355	125.775	106.381	97.2461	42.7638	29.8736	40.3087	41.4693	112.189	38.6038	2.90617	61.2576	-1.54149	0.205908	-7.48633	7.08266e-14	3.74653e-12
Proc	2907.15	4793.05	5173.42	4996.55	1844.54	1794.17	1716.4	1045.95	4467.54	1600.27	2.79175	3291.24	-1.48109	0.19797	-7.48136	7.35586e-14	3.88132e-12
Mpped1	205.556	337.667	300.552	306.537	0.950306	0	1.87482	0	287.578	0.706282	407.171	143.978	-8.69072	1.16224	-7.47757	7.57073e-14	3.98474e-12
Ccbe1	136.406	139.372	121.873	137.413	305.048	249.532	256.851	294.893	133.766	276.581	0.483642	211.152	1.0479	0.140284	7.46984	8.02929e-14	4.20512e-12
Car9	274.706	377.325	351.161	381.585	170.105	152.004	120.926	104.134	346.194	136.792	2.53081	253.087	-1.33857	0.179474	-7.45832	8.7631e-14	4.57119e-12
Slc22a27	2.84179	0	4.1313	3.17107	51.3165	37.7813	48.7454	88.4679	2.53604	56.5778	0.044824	31.0873	4.45349	0.597249	7.45667	8.87386e-14	4.6131e-12
Prom1	5251.62	2969.88	3085.05	3038.94	8047.19	8697.6	7936.12	8456.97	3586.37	8284.47	0.432903	5782.22	1.20765	0.162083	7.45083	9.27531e-14	4.79815e-12
Aspg	850.642	1334.8	1239.39	1375.19	511.265	548.268	437.771	248.816	1200.01	436.53	2.74897	956.017	-1.45843	0.19597	-7.44209	9.91083e-14	5.08949e-12
A730020M07Rik	60.6248	60.0548	69.1993	61.3073	15.2049	15.8154	24.3727	11.98	62.7965	16.8433	3.72829	39.9997	-1.90057	0.255436	-7.44051	1.00295e-13	5.13793e-12
D030045P18Rik	28.4179	27.1946	23.755	26.4256	99.7822	84.3489	71.2433	103.212	26.4483	89.6467	0.295028	60.3971	1.76001	0.237136	7.42194	1.15417e-13	5.86983e-12
Eif2s3y	2099.13	1194.3	1275.54	1061.25	3.80122	0	0	0	1407.56	0.950306	1481.16	659.298	-10.5505	1.42201	-7.41945	1.1761e-13	5.95273e-12
Aldh1a2	163.876	122.376	136.333	106.759	299.346	263.59	389.963	436.81	132.336	347.427	0.380903	229.83	1.38981	0.189089	7.35004	1.98141e-13	9.9808e-12
Gm16146	406.376	405.653	451.345	452.406	195.763	165.183	193.107	172.328	428.945	181.595	2.36209	318.984	-1.24054	0.168836	-7.34763	2.01752e-13	1.00904e-11
Snx31	538.045	390.923	473.034	464.033	229.024	248.653	200.606	209.19	466.509	221.868	2.10264	349.899	-1.07293	0.146023	-7.34768	2.01683e-13	1.00904e-11
Gypc	116.513	78.1845	99.1512	95.1321	233.775	231.959	215.605	217.483	97.2453	224.706	0.432767	150.789	1.20373	0.164962	7.29703	2.94188e-13	1.46097e-11
Nat2	747.39	416.984	505.051	555.994	229.024	231.081	205.293	270.933	556.355	234.083	2.37675	400.299	-1.25018	0.171447	-7.29193	3.05548e-13	1.51383e-11
Idi1	430.057	227.755	257.173	266.37	65.5711	79.0771	97.4908	126.251	295.339	92.0975	3.20681	188.562	-1.68269	0.23105	-7.2828	3.26968e-13	1.61238e-11
Gm36897	0	4.53244	1.03283	0	46.565	42.1744	38.4339	46.077	1.39132	43.3126	0.0321227	26.9471	5.054	0.694102	7.28135	3.30496e-13	1.62598e-11
Uroc1	1271.23	1554.63	1405.67	1396.33	3102.75	3318.6	2846.92	2062.41	1406.96	2832.67	0.496692	2053.51	1.00986	0.138715	7.28011	3.33545e-13	1.63716e-11
Gm40663	7.5781	5.66555	1.03283	3.17107	53.2171	49.2035	42.1835	29.4893	4.36188	43.5234	0.100219	22.0021	3.30635	0.454303	7.27785	3.3917e-13	1.66091e-11
Wfdc2	1014.52	1342.73	1525.48	1497.8	3487.62	3785.16	2971.59	2111.25	1345.13	3088.91	0.435473	2340.14	1.19962	0.164927	7.27361	3.49993e-13	1.70994e-11
Camk1g	58.7303	86.1163	59.9039	99.3602	194.813	180.12	213.73	184.308	76.0276	193.243	0.393431	122.796	1.35064	0.185762	7.27079	3.57378e-13	1.73798e-11
Apcdd1	84.3063	94.0481	96.0527	85.6189	191.962	204.722	184.67	166.799	90.0065	187.038	0.48122	133.506	1.05712	0.145918	7.24464	4.33595e-13	2.10378e-11
Hsd3b2	6092.79	4100.72	4773.72	4375.02	1109.01	1218.67	1837.33	2086.37	4835.56	1562.84	3.09408	3057.84	-1.62959	0.225017	-7.24209	4.41833e-13	2.13884e-11
Igfals	150.615	260.615	259.239	264.256	745.99	766.169	843.67	433.124	233.681	697.238	0.335153	508.124	1.57857	0.219174	7.20233	5.91925e-13	2.81378e-11
Arfgef3	206.503	319.537	255.108	242.058	711.779	738.931	589.632	515.141	255.802	638.871	0.400396	465.841	1.32225	0.184382	7.17127	7.43026e-13	3.52411e-11
Henmt1	61.5721	37.3926	47.51	31.7107	5.70184	8.78634	5.62447	1.84308	44.5463	5.48893	8.11566	27.0941	-3.01854	0.421306	-7.16471	7.79536e-13	3.68899e-11
Gm30001	211.239	151.837	196.237	182.865	84.5773	84.3489	76.8677	85.7032	185.544	82.8743	2.23887	131.681	-1.16516	0.162688	-7.16193	7.95502e-13	3.75612e-11
Eps8l3	47.3631	46.4575	53.7069	47.566	14.2546	9.66497	7.49929	5.52924	48.7734	9.23702	5.2802	24.5625	-2.40361	0.336029	-7.15299	8.49069e-13	4.0001e-11
Hdc	143.984	220.956	145.628	198.72	489.408	485.006	902.727	692.077	177.322	642.304	0.276072	601.698	1.85812	0.259908	7.14914	8.73256e-13	4.08668e-11
Crot	23047.8	13265.3	16049.1	15415.6	6836.5	6878.83	5333.87	6103.36	16944.5	6288.14	2.69467	12027.5	-1.43013	0.200123	-7.14626	8.9175e-13	4.164e-11
Gm41297	29.3651	33.9933	39.2474	51.7941	1.90061	1.75727	0.937411	0	38.6	1.14882	33.5996	18.4586	-5.06571	0.710332	-7.13147	9.93011e-13	4.61641e-11
2810459M11Rik	59.6775	44.1913	50.6084	46.509	11.4037	14.0581	1.87482	2.76462	50.2466	7.52532	6.677	29.5143	-2.73276	0.384004	-7.11648	1.10716e-12	5.11328e-11
Comp	10.4199	22.6622	13.4267	19.0264	81.7263	108.951	72.1807	63.5863	16.3838	81.611	0.200755	57.778	2.3299	0.330358	7.05266	1.75525e-12	8.05357e-11
Gm40112	34.1014	31.7271	52.6741	35.9388	8.55276	2.6359	3.74965	4.6077	38.6103	4.8865	7.90143	23.0525	-2.99412	0.424739	-7.0493	1.79814e-12	8.23244e-11
Frzb	1157.55	1005.07	1140.24	1026.37	312.651	340.91	519.326	550.159	1082.31	430.762	2.51254	711.975	-1.3294	0.188608	-7.04848	1.80883e-12	8.26348e-11
Gm4956	200.82	159.768	211.729	225.146	87.4282	72.9266	82.4922	107.82	199.366	87.6668	2.27413	159.224	-1.18743	0.168755	-7.03642	1.97242e-12	8.97197e-11
Mpzl2	381.747	301.407	359.423	307.594	822.965	945.41	623.379	653.372	337.543	761.281	0.443387	562.356	1.17263	0.166698	7.03445	2.00045e-12	9.07988e-11
Ccr1	17.998	5.66555	10.3283	10.5702	66.5214	46.5676	49.6828	59.9001	11.1405	55.668	0.200124	32.5897	2.29647	0.326721	7.02884	2.08256e-12	9.40486e-11
Mcm10	211.239	208.492	211.729	242.058	111.186	103.679	111.552	91.2325	218.38	104.412	2.09151	164.984	-1.06493	0.151526	-7.02799	2.09532e-12	9.42939e-11
Gm40145	215.029	409.052	131.169	206.119	10.4534	13.1795	19.6856	19.3523	240.342	15.6677	15.34	124.161	-3.93891	0.560613	-7.02607	2.12435e-12	9.51945e-11
Slitrk6	457.528	288.943	355.292	287.51	105.484	128.281	137.799	176.936	347.318	137.125	2.53286	258.184	-1.342	0.191873	-6.99421	2.66767e-12	1.18534e-10
D630029K05Rik	2686.44	2311.54	2158.6	2262.03	1258.21	1428.66	972.095	941.814	2354.65	1150.19	2.04718	1677.75	-1.0336	0.1481	-6.97905	2.97172e-12	1.31767e-10
Itih2	521.942	440.78	489.559	401.669	170.105	136.188	143.424	141.917	463.487	147.909	3.13361	282.351	-1.64843	0.236214	-6.97853	2.98289e-12	1.31985e-10
BC024386	2477.09	2967.61	3256.5	3284.17	1136.57	980.556	1543.92	1191.55	2996.34	1213.15	2.46989	2073.74	-1.30448	0.187155	-6.97008	3.16764e-12	1.39575e-10
Ccdc180	25.5761	45.3244	37.1817	42.2809	110.236	86.1061	122.801	115.193	37.5908	108.584	0.346191	75.0131	1.53811	0.221843	6.93332	4.11091e-12	1.78529e-10
Gm42192	3.78905	3.39933	0	4.22809	46.565	44.8103	38.4339	39.6262	2.85412	42.3589	0.0673795	23.9554	3.89144	0.561402	6.93165	4.15962e-12	1.80273e-10
Car4	4609.38	4764.73	5383.08	4845.39	1991.84	1933.87	2446.64	2192.34	4900.65	2141.18	2.28876	3780.17	-1.19459	0.173279	-6.89403	5.42321e-12	2.33121e-10
Rhov	252.919	334.267	246.845	199.777	125.44	123.887	138.737	106.899	258.452	123.741	2.08866	198.902	-1.06117	0.154375	-6.87397	6.2441e-12	2.67318e-10
0610006L08Rik	481.209	379.592	489.559	417.524	160.602	187.149	146.236	171.406	441.971	166.348	2.6569	304.198	-1.4098	0.205278	-6.86777	6.5215e-12	2.76947e-10
Hmox1	571.199	744.453	770.488	640.556	298.396	304.886	381.526	341.891	681.674	331.675	2.05525	596.189	-1.03892	0.151346	-6.8645	6.67238e-12	2.82786e-10
Ugt2b5	141.142	88.3825	72.2978	88.7899	31.3601	22.8445	10.3115	10.1369	97.6531	18.6633	5.23237	48.9717	-2.38971	0.34891	-6.84908	7.43275e-12	3.13125e-10
Ugt1a10	21.787	15.8635	13.4267	8.45618	126.391	104.557	74.9929	59.9001	14.8834	91.4603	0.16273	63.1026	2.61296	0.382202	6.83659	8.11023e-12	3.39632e-10
Gm41925	71.0447	49.8568	52.6741	50.7371	12.354	17.5727	9.37411	5.52924	56.0782	11.2075	5.00363	28.6279	-2.32039	0.339492	-6.83488	8.20715e-12	3.4301e-10
Cyp2a4	11119.9	9762.87	10833.3	10526.9	5025.22	5154.95	3408.43	3473.28	10560.7	4265.47	2.47587	7684.34	-1.30793	0.191419	-6.83281	8.32682e-12	3.46652e-10
Cldn18	89.0427	65.7203	29.9519	39.1098	0.950306	1.75727	8.4367	11.98	55.9562	5.78107	9.6792	28.5025	-3.27969	0.48017	-6.83027	8.47541e-12	3.5213e-10
Lipo2	79.57	50.9899	54.7397	73.9916	0.950306	0	0	0.92154	64.8228	0.467962	138.522	26.2933	-7.13891	1.04785	-6.81293	9.56337e-12	3.95773e-10
Pde11a	49.2576	38.5257	53.7069	41.2239	167.254	130.916	110.615	123.486	45.6785	133.068	0.343273	85.9662	1.53887	0.227476	6.76498	1.33325e-11	5.46399e-10
Cyp2d12	4573.38	4302.42	4627.06	4021.97	1239.2	1177.37	1624.53	2323.2	4381.21	1591.08	2.75361	3185.21	-1.46136	0.216563	-6.74798	1.49917e-11	6.12023e-10
Nek2	205.556	182.431	185.909	137.413	74.1239	59.7471	88.1167	55.2924	177.827	69.32	2.56531	121.177	-1.36156	0.202034	-6.73927	1.59181e-11	6.47335e-10
Rbm11	129.775	74.7852	107.414	134.242	32.3104	35.1454	40.3087	44.2339	111.554	37.9996	2.93566	72.6777	-1.55675	0.231487	-6.72501	1.75579e-11	7.1128e-10
Ugt2a3	63.4666	48.7237	63.0023	59.1933	24.708	13.1795	14.0612	17.5093	58.5965	17.3645	3.3745	41.2718	-1.76254	0.262309	-6.71933	1.82556e-11	7.36717e-10
Tgfa	38.8378	38.5257	50.6084	30.6537	188.161	303.129	177.171	56.2139	39.6564	181.169	0.218892	176.355	2.1918	0.326231	6.71853	1.83563e-11	7.39368e-10
Aifm3	416.795	733.122	756.028	713.49	246.129	260.076	338.405	193.523	654.859	259.533	2.52322	486.456	-1.3347	0.198863	-6.71168	1.9239e-11	7.73443e-10
Hpgd	480.262	294.608	341.865	327.677	953.157	742.446	736.805	841.366	361.103	818.444	0.441207	583.072	1.17876	0.175901	6.70128	2.06597e-11	8.27408e-10
Car5a	24.6288	47.5906	39.2474	57.0792	123.54	139.703	155.61	91.2325	42.1365	127.521	0.330427	88.3098	1.60549	0.240224	6.68331	2.33605e-11	9.30275e-10
Trim46	37.8905	69.1197	44.4115	49.6801	160.602	177.484	171.546	99.5263	50.2754	152.29	0.33013	109.309	1.60572	0.240798	6.66834	2.58716e-11	1.02065e-09
Tbx3	149.667	183.564	180.744	150.097	273.688	294.342	388.088	410.085	166.018	341.551	0.486071	226.934	1.04207	0.156846	6.64393	3.05432e-11	1.19158e-09
Scgb1c1	4.73631	3.39933	4.1313	0	24.708	36.024	29.9972	35.0185	3.06674	31.4369	0.097552	19.7119	3.34062	0.50449	6.62179	3.5488e-11	1.37686e-09
Nwd2	48.3104	29.4608	35.1161	39.1098	10.4534	7.02907	4.68706	5.52924	37.9993	6.92468	5.48751	26.8003	-2.46386	0.372769	-6.60962	3.85298e-11	1.48939e-09
Ror2	49.2576	83.8501	61.9695	87.7329	257.533	275.891	215.605	128.094	70.7025	219.281	0.322429	157.77	1.63717	0.247992	6.60171	4.06435e-11	1.56251e-09
Prss35	19.8925	18.1298	22.7222	21.1405	56.0681	59.7471	179.983	213.797	20.4712	127.399	0.160686	57.3733	2.63661	0.402171	6.55594	5.52914e-11	2.11027e-09
Mgst1	1630.24	1041.33	1255.92	1085.56	2460.34	2697.41	2283.53	2675.23	1253.26	2529.13	0.495531	1830.86	1.01242	0.154642	6.54684	5.87678e-11	2.23395e-09
Nkain1	228.29	257.216	261.305	218.804	566.383	564.083	488.391	383.361	241.404	500.554	0.482273	390.445	1.05266	0.160793	6.54663	5.88493e-11	2.23395e-09
Gm41469	43.5741	48.7237	30.9848	38.0528	7.60245	7.90771	7.49929	2.76462	40.3338	6.44352	6.2596	23.2708	-2.64435	0.404015	-6.54518	5.94247e-11	2.2477e-09
Fuca2	20746	14716.8	17368	16653.4	8566.06	8648.4	6861.85	7897.6	17371	7993.48	2.17315	13070.9	-1.11981	0.171099	-6.54481	5.95717e-11	2.24923e-09
D330045A20Rik	57.783	39.6588	47.51	38.0528	161.552	160.79	110.615	170.485	45.7512	150.86	0.303268	91.1063	1.7173	0.262484	6.54249	6.05048e-11	2.28038e-09
Cblc	368.485	730.856	717.813	747.315	256.583	327.731	265.287	199.053	641.117	262.163	2.44549	489.628	-1.28888	0.197046	-6.54099	6.11138e-11	2.29923e-09
Shroom1	69.1501	175.632	134.267	170.181	40.8632	45.689	35.6216	30.4108	137.308	38.1461	3.59951	78.9111	-1.84401	0.282591	-6.52537	6.78321e-11	2.54292e-09
Akr1c14	12043.5	6124.46	9758.13	9091.45	3327.97	3197.35	1766.08	2648.51	9254.38	2734.98	3.38371	6418.25	-1.75863	0.26962	-6.52261	6.90942e-11	2.58564e-09
Ankrd65	71.9919	171.1	178.679	132.128	27.5589	54.4753	41.2461	14.7446	138.475	34.5062	4.01303	96.5442	-1.99974	0.306902	-6.51589	7.22597e-11	2.69455e-09
Gm28818	0.947262	2.26622	0	0	47.5153	43.9317	40.3087	32.2539	0.80337	41.0024	0.0195932	19.0663	5.71644	0.879256	6.50145	7.95494e-11	2.9404e-09
Slc37a2	97.568	82.717	85.7245	105.702	176.757	157.275	203.418	223.934	92.9279	190.346	0.488205	133.496	1.03218	0.15879	6.50029	8.01677e-11	2.95807e-09
Gm30784	85.2536	71.3859	77.4619	82.4478	29.4595	14.0581	28.1223	35.9401	79.1373	26.895	2.94245	49.218	-1.56349	0.241632	-6.47053	9.76601e-11	3.56612e-09
Kap	763423	385320	511154	465554	172730	194171	142056	214747	531363	180926	2.93691	353425	-1.5543	0.241344	-6.44017	1.19339e-10	4.32037e-09
Trf	1503.31	1034.53	1327.18	1110.93	2590.53	2881.92	3139.39	2493.69	1243.99	2776.38	0.44806	1905.92	1.1579	0.180584	6.41198	1.43641e-10	5.17354e-09
Kcng1	69.1501	143.905	100.184	79.2767	34.211	20.2086	20.623	19.3523	98.1289	23.5987	4.15823	53.637	-2.05535	0.320583	-6.41129	1.44293e-10	5.18817e-09
Sytl3	22.7343	36.2595	34.0832	38.0528	111.186	108.951	72.1807	73.7232	32.7825	91.5101	0.358239	65.8485	1.48888	0.232572	6.4018	1.53558e-10	5.50255e-09
Igf2os	0	0	1.03283	2.11405	23.7577	33.3881	56.2447	50.6847	0.786718	41.0188	0.0191795	26.289	5.7176	0.894575	6.39141	1.64366e-10	5.86988e-09
Gm36363	2.84179	4.53244	0	4.22809	32.3104	27.2377	32.8094	51.6062	2.90058	35.9909	0.080592	19.3523	3.65007	0.572438	6.37635	1.81357e-10	6.46576e-09
Gm30536	195.136	319.537	334.635	313.936	100.732	84.3489	125.613	115.193	290.811	106.472	2.73134	187.386	-1.44922	0.227544	-6.36897	1.90297e-10	6.75028e-09
Gm36600	155.351	183.564	189.007	189.207	45.6147	42.1744	79.68	85.7032	179.282	63.2931	2.83257	133.537	-1.50253	0.236084	-6.3644	1.96059e-10	6.94297e-09
E330021D16Rik	1.89452	0	1.03283	0	43.7141	38.6599	33.7468	27.6462	0.731837	35.9417	0.0203618	21.28	5.53129	0.871498	6.34688	2.19727e-10	7.71641e-09
Npm3	376.063	401.121	565.988	523.226	221.421	216.144	233.415	200.896	466.6	217.969	2.14067	343.952	-1.09801	0.173358	-6.33376	2.39258e-10	8.34673e-09
Plcxd1	118.408	147.304	142.53	120.501	69.3724	54.4753	69.3684	42.3908	132.186	58.9017	2.24417	93.1278	-1.16632	0.184291	-6.32867	2.47289e-10	8.59848e-09
Serpina1a	244.394	247.018	271.633	242.058	94.0803	59.7471	53.4324	32.2539	251.276	59.8784	4.19643	146.333	-2.06998	0.327396	-6.32257	2.57257e-10	8.93036e-09
Cyp4a12b	107.041	61.1879	57.8382	47.566	6.65214	18.4513	19.6856	13.8231	68.4082	14.653	4.66853	61.1546	-2.22298	0.351683	-6.32097	2.59923e-10	9.00811e-09
Lrit3	10.4199	21.5291	15.4924	16.9124	49.4159	43.9317	71.2433	58.057	16.0884	55.662	0.289038	40.6971	1.80394	0.285669	6.31479	2.70535e-10	9.3605e-09
Tlcd2	211.239	192.629	250.976	233.602	118.788	95.7711	100.303	71.8801	222.112	96.6856	2.29726	161.31	-1.20105	0.190516	-6.3042	2.8969e-10	9.99052e-09
Zfp937	435.741	284.41	324.307	293.852	153.95	150.246	151.861	193.523	334.578	162.395	2.06027	244.955	-1.04477	0.165981	-6.29455	3.083e-10	1.0615e-08
Hsd3b1	0	0	1.03283	0	0.950306	2.6359	8016.74	9264.24	0.258206	4321.14	5.97542e-05	1080.98	14.0252	2.22835	6.29398	3.09434e-10	1.06367e-08
Apln	295.546	219.823	238.583	250.514	619.6	584.292	450.895	459.849	251.117	528.659	0.475007	385.805	1.07267	0.170842	6.27869	3.41443e-10	1.16799e-08
Aqp4	1675.71	1734.79	1412.9	1811.74	4738.23	4394.05	2727.87	3368.23	1658.78	3807.09	0.435709	2975.25	1.19861	0.190989	6.2758	3.4785e-10	1.18606e-08
Smcp	17.998	47.5906	46.4771	41.2239	5.70184	4.39317	5.62447	4.6077	38.3224	5.08179	7.54112	18.8858	-2.91231	0.464138	-6.27466	3.50391e-10	1.1928e-08
Igsf10	120.302	83.8501	74.3634	90.904	240.427	166.94	194.044	221.17	92.3549	205.645	0.449098	141.41	1.15025	0.183747	6.25997	3.85063e-10	1.30243e-08
Krt15	29.3651	39.6588	23.755	40.1669	81.7263	97.5284	87.1792	75.5663	33.2365	85.5001	0.38873	61.0775	1.37059	0.219046	6.25709	3.92229e-10	1.32243e-08
B3gnt7	80.5173	105.379	103.283	130.014	267.036	272.377	211.855	165.877	104.798	229.286	0.457063	179.744	1.13247	0.181085	6.25378	4.00635e-10	1.34861e-08
AI481877	53.994	19.2629	21.6893	22.1975	0.950306	2.6359	2.81223	2.76462	29.2859	2.29077	12.7843	14.5295	-3.67949	0.590095	-6.23542	4.50571e-10	1.50948e-08
Wnt4	52.0994	89.5156	58.871	69.7635	112.136	176.605	221.229	186.151	67.5624	174.03	0.388222	114.491	1.37085	0.220347	6.22133	4.92947e-10	1.63845e-08
Pdxk	1637.82	2678.67	2148.28	2182.75	5497.52	5655.77	4652.37	3472.36	2161.88	4819.51	0.448569	3682.32	1.15683	0.185972	6.22048	4.95632e-10	1.6422e-08
Gm31954	67.2556	98.5805	88.823	73.9916	36.1116	23.7231	40.3087	31.3324	82.1627	32.869	2.4997	53.4483	-1.32167	0.212513	-6.21925	4.99528e-10	1.65251e-08
2310007B03Rik	47.3631	66.8535	56.8054	57.0792	141.596	144.975	186.545	87.5463	57.0253	140.165	0.406843	113.912	1.30137	0.209869	6.20085	5.61586e-10	1.84336e-08
Nt5dc2	269.022	447.578	514.347	549.652	215.72	189.785	220.292	156.662	445.15	195.614	2.27565	330.66	-1.18563	0.191573	-6.18893	6.05749e-10	1.98216e-08
Gm28905	50.2049	38.5257	27.8863	35.9388	9.50306	10.5436	2.81223	6.45078	38.1389	7.32742	5.20496	18.7598	-2.37744	0.384204	-6.18797	6.09456e-10	1.9912e-08
Cpb2	27.4706	24.9284	17.558	20.0834	61.7699	91.3779	67.4936	66.3509	22.5101	71.7481	0.313738	49.9737	1.6717	0.27044	6.18143	6.35252e-10	2.06908e-08
Gusb	2029.98	2103.05	2815.48	2466.03	1186.93	1053.48	1018.97	996.185	2353.64	1063.89	2.21229	1709.62	-1.14556	0.185322	-6.18148	6.35045e-10	2.06908e-08
Acot12	6283.19	4512.04	5607.21	5686.78	3064.74	3046.22	1890.76	1974.86	5522.31	2494.15	2.21411	4194.16	-1.14675	0.185567	-6.17974	6.4208e-10	2.08809e-08
Gm30143	23.6816	26.0615	21.6893	29.5966	0	2.6359	1.87482	0.92154	25.2573	1.35807	18.598	10.4723	-4.19365	0.678714	-6.17881	6.45852e-10	2.09391e-08
Gm10384	46.4159	35.1264	16.5252	27.4826	4.75153	5.2718	6.56188	2.76462	31.3875	4.83746	6.48843	22.8261	-2.70185	0.437317	-6.17823	6.48235e-10	2.09841e-08
Tnfrsf19	40.7323	39.6588	43.3787	40.1669	64.6208	123.887	164.047	199.974	40.9842	138.132	0.296702	77.6267	1.7529	0.283831	6.17585	6.58095e-10	2.12707e-08
Sox2ot	44.5213	40.7919	30.9848	49.6801	0	0.878634	0	0.92154	41.4945	0.450044	92.2011	20.3298	-6.49392	1.05316	-6.16612	6.99871e-10	2.25175e-08
Rpp40	348.593	208.492	295.388	321.335	144.447	120.373	102.178	108.742	293.452	118.935	2.46734	217.048	-1.30444	0.213449	-6.11124	9.886e-10	3.13765e-08
Cyp11a1	0.947262	4.53244	3.09848	3.17107	3.80122	6.15044	2039.81	2106.64	2.93731	1039.1	0.00282678	262.833	8.47361	1.3869	6.10975	9.97862e-10	3.15755e-08
Slc6a9	437.635	994.87	862.409	879.443	352.564	357.604	311.221	196.288	793.589	304.419	2.6069	551.392	-1.38165	0.22639	-6.10295	1.0413e-09	3.28025e-08
Gm19696	198.925	303.673	282.994	312.879	109.285	136.188	160.297	140.996	274.618	136.692	2.00903	227.645	-1.00421	0.164905	-6.08962	1.13178e-09	3.54939e-08
LOC102636309	503.944	547.292	568.054	544.367	270.837	232.838	296.222	264.482	540.914	266.095	2.03279	409.981	-1.02365	0.168215	-6.08538	1.16213e-09	3.63377e-08
Gm33742	2.84179	0	1.03283	0	33.2607	29.8736	20.623	30.4108	0.968653	28.542	0.0339378	14.8673	4.78824	0.788466	6.07285	1.25658e-09	3.91749e-08
Tmem25	1575.3	2356.87	2357.94	2364.56	943.654	904.993	1311.44	1007.24	2163.67	1041.83	2.07679	1548.48	-1.05424	0.173722	-6.06855	1.29074e-09	4.01804e-08
1700019D03Rik	21.787	19.2629	8.2626	17.9694	53.2171	79.9557	42.1835	58.057	16.8205	58.3533	0.288252	39.6653	1.79468	0.29622	6.05858	1.37327e-09	4.2499e-08
Ube2c	13.2617	10.198	16.5252	5.28511	51.3165	29.8736	58.1195	63.5863	11.3175	50.724	0.223119	31.0486	2.15486	0.356286	6.04812	1.46548e-09	4.52198e-08
Gm15350	37.8905	43.0582	37.1817	46.509	6.65214	7.02907	11.2489	3.68616	41.1598	7.15408	5.75334	25.9729	-2.52508	0.417647	-6.04597	1.48516e-09	4.57603e-08
Coro2a	195.136	219.823	319.143	312.879	135.894	115.98	104.99	89.3894	261.745	111.563	2.34616	188.614	-1.23018	0.204262	-6.02258	1.71657e-09	5.23554e-08
Hsd17b14	9.47262	28.3277	23.755	27.4826	96.9312	100.164	103.115	63.5863	22.2595	90.9493	0.244746	58.8907	2.04122	0.339204	6.01767	1.76951e-09	5.38144e-08
Gm41676	65.3611	44.1913	51.6413	56.0222	8.55276	8.78634	17.8108	9.2154	54.304	11.0913	4.89607	33.8735	-2.2961	0.381755	-6.0146	1.80335e-09	5.47648e-08
Tsku	377.01	830.569	781.849	782.197	298.396	306.643	273.724	175.093	692.906	263.464	2.62998	569.623	-1.39435	0.231952	-6.01137	1.8396e-09	5.57852e-08
Apoe	2541.5	3843.51	4019.76	3952.21	10473.3	8888.26	8035.49	6420.37	3589.24	8454.36	0.424543	5976.81	1.2361	0.205661	6.01035	1.85122e-09	5.60571e-08
Ly6f	23.6816	12.4642	16.5252	27.4826	171.055	79.0771	94.6785	145.603	20.0384	122.604	0.163441	75.4215	2.60891	0.437605	5.96179	2.49496e-09	7.41669e-08
D230017M19Rik	578.777	814.706	644.483	640.556	186.26	188.906	298.097	289.364	669.63	240.657	2.78251	455.594	-1.47625	0.248445	-5.94196	2.8163e-09	8.32506e-08
Gpr85	36.9432	18.1298	41.313	23.2545	102.633	75.5625	87.1792	95.8402	29.9101	90.3038	0.331217	62.3074	1.58386	0.266944	5.9333	2.96911e-09	8.71572e-08
Akr1c12	82.4118	38.5257	54.7397	68.7065	155.85	155.518	112.489	140.996	61.0959	141.213	0.43265	96.8469	1.20071	0.202867	5.91873	3.24445e-09	9.4844e-08
Nr5a1	0	0	0	0	0	0	410.586	293.971	0	176.139	0	44.0883	24.8349	4.20643	5.90403	3.54732e-09	1.02842e-07
Slc22a19	3159.12	1870.76	2452.96	1995.66	6075.31	5435.23	4756.42	5543.06	2369.63	5452.51	0.434594	4002.33	1.20206	0.203825	5.89748	3.69087e-09	1.06275e-07
Ctxn3	117.461	92.915	202.434	179.694	14.2546	14.0581	38.4339	37.7831	148.126	26.1324	5.66827	92.5585	-2.50419	0.425738	-5.88199	4.05373e-09	1.15619e-07
Nlrc4	296.493	300.274	287.125	323.449	118.788	169.576	122.801	100.448	301.835	127.903	2.35987	206.563	-1.23757	0.210663	-5.87464	4.23756e-09	1.20212e-07
Scrg1	1.89452	0	0	3.17107	34.211	15.8154	30.9346	32.2539	1.2664	28.3037	0.0447432	12.9045	4.44963	0.757644	5.87299	4.28004e-09	1.21255e-07
Ifrd2	900.846	1406.19	1618.44	1491.46	723.183	754.747	714.307	515.141	1354.23	676.845	2.0008	1147.64	-1.0002	0.170847	-5.85439	4.78775e-09	1.35094e-07
Ttr	1915.36	3510.37	3631.41	4204.84	1401.7	1641.29	856.794	834.915	3315.5	1183.67	2.80102	2678.96	-1.48579	0.254451	-5.8392	5.24519e-09	1.46629e-07
P3h4	88.0954	92.915	114.644	93.018	220.471	232.838	167.797	159.426	97.168	195.133	0.497958	155.351	1.00673	0.173841	5.79111	6.99219e-09	1.91659e-07
Id4	288.915	249.284	262.338	238.887	864.779	996.371	400.275	466.299	259.856	681.931	0.381059	506.068	1.39172	0.242956	5.72827	1.01459e-08	2.73835e-07
Scn5a	15.1562	19.2629	15.4924	11.6273	84.5773	84.3489	58.1195	29.4893	15.3847	64.1337	0.239884	42.3592	2.063	0.361336	5.70936	1.13402e-08	3.04126e-07
Ggt1	23603.9	36771.7	40194.5	37841.4	19558.3	19990.7	16614.7	11370	34602.9	16883.4	2.04952	27549.4	-1.03527	0.181417	-5.70657	1.15272e-08	3.08748e-07
Gm35466	165.771	198.294	184.876	199.777	77.9251	65.0189	88.1167	75.5663	187.18	76.6567	2.44179	117.052	-1.28805	0.226799	-5.67926	1.35279e-08	3.58243e-07
Lrrc3	435.741	641.34	664.107	550.709	259.434	267.983	304.659	276.462	572.974	277.134	2.06749	453.981	-1.04731	0.184482	-5.67702	1.37059e-08	3.62048e-07
Dleu7	564.568	418.117	460.64	450.292	128.291	191.542	261.538	300.422	473.404	220.448	2.14746	364.279	-1.10312	0.194684	-5.66619	1.46011e-08	3.83775e-07
Spc25	497.313	284.41	325.34	336.133	965.511	1029.76	693.684	825.7	360.799	878.664	0.410623	652.96	1.28309	0.226952	5.65354	1.57173e-08	4.12086e-07
Sorcs2	24.6288	63.4541	40.2802	40.1669	104.534	111.587	116.239	82.0171	42.1325	103.594	0.406708	68.1839	1.31033	0.232463	5.63671	1.73333e-08	4.5165e-07
Dlg2	133.564	116.71	123.939	103.588	223.322	222.294	435.896	472.75	119.45	338.566	0.352813	228.479	1.5022	0.266681	5.63297	1.77133e-08	4.60416e-07
Pdxk-ps	4.73631	4.53244	9.29543	11.6273	41.8135	57.1112	44.9957	19.3523	7.54786	40.8182	0.184914	21.772	2.43785	0.433944	5.61789	1.93304e-08	4.99373e-07
2500002B13Rik	246.288	164.301	207.598	195.549	91.2294	91.3779	92.8037	118.879	203.434	98.5724	2.0638	147.553	-1.04748	0.186476	-5.61726	1.94005e-08	5.0057e-07
Cyp4a10	3257.64	2070.19	2175.13	1978.75	5613.46	6483.44	3741.21	4030.82	2370.43	4967.23	0.477213	3941.99	1.06711	0.190602	5.59864	2.16043e-08	5.54046e-07
Gm15343	684.871	806.774	821.096	662.753	258.483	294.342	469.643	433.124	743.873	363.898	2.04418	562.826	-1.03147	0.184418	-5.5931	2.23054e-08	5.7064e-07
Gm34150	43.5741	36.2595	40.2802	29.5966	96.9312	79.9557	82.4922	82.0171	37.4276	85.3491	0.438524	61.9668	1.18429	0.212158	5.58211	2.37612e-08	6.04223e-07
Gm31106	26.5233	20.396	24.7878	23.2545	3.80122	3.51454	1.87482	5.52924	23.7404	3.67996	6.45127	12.7329	-2.69121	0.484456	-5.55513	2.77402e-08	6.97006e-07
Thrsp	398.797	266.281	308.815	252.628	573.985	1007.79	1522.36	808.191	306.63	978.081	0.313502	621.72	1.6729	0.301167	5.55471	2.78069e-08	6.9785e-07
Serpina10	33.1542	22.6622	17.558	15.8553	109.285	57.1112	82.4922	76.4878	22.3074	81.3441	0.274235	48.6413	1.85917	0.335166	5.54701	2.90602e-08	7.28438e-07
Camk4	99.4625	128.041	86.7573	82.4478	225.223	144.975	213.73	228.542	99.1773	203.117	0.488276	144.738	1.0357	0.186808	5.54418	2.95334e-08	7.38545e-07
Oxtr	8.52536	13.5973	11.3611	21.1405	23.7577	36.9026	196.856	210.111	13.6561	116.907	0.116811	44.3253	3.10115	0.560704	5.53081	3.18753e-08	7.9335e-07
Slc39a5	305.966	643.606	619.695	663.81	1543.3	1514.77	1462.36	775.937	558.269	1324.09	0.421625	1068.47	1.24673	0.22547	5.52949	3.2117e-08	7.98423e-07
Gm8883	1.89452	3.39933	0	0	25.6583	22.8445	18.7482	23.0385	1.32346	22.5724	0.058632	13.5539	4.11734	0.744907	5.52731	3.25169e-08	8.07414e-07
Chgb	3.78905	3.39933	1.03283	6.34214	1.90061	3.51454	1961.06	2047.66	3.64084	1003.54	0.00362801	252.701	8.10694	1.47349	5.50187	3.7578e-08	9.22235e-07
Gm39044	0.947262	1.13311	0	1.05702	31.3601	15.8154	32.8094	25.8031	0.784349	26.447	0.0296574	15.278	5.08294	0.925011	5.495	3.907e-08	9.5407e-07
Pknox2	68.2029	61.1879	58.871	70.8205	136.844	150.246	143.424	134.545	64.7706	141.265	0.458505	102.716	1.12427	0.204603	5.49486	3.91012e-08	9.5407e-07
Tgfb2	137.353	99.7136	96.0527	85.6189	261.334	224.93	175.296	191.68	104.685	213.31	0.490762	156.997	1.02339	0.186792	5.47875	4.28331e-08	1.03912e-06
Gm16505	75.781	106.512	75.3962	119.444	25.6583	28.9949	38.4339	38.7047	94.2833	32.9479	2.86158	76.5672	-1.51488	0.276683	-5.47515	4.37153e-08	1.05809e-06
Klhl29	42.6268	52.123	56.8054	65.5354	101.683	129.159	134.987	129.016	54.2727	123.711	0.438704	93.374	1.1917	0.217816	5.47113	4.47165e-08	1.08108e-06
C030029H02Rik	0	0	0	0	12.354	12.3009	13.1238	13.8231	0	12.9004	0	6.48081	6.07473	1.11945	5.42655	5.74528e-08	1.37327e-06
Gm26588	43.5741	32.8602	37.1817	29.5966	76.0245	83.4702	119.989	96.7617	35.8031	94.0613	0.380636	62.796	1.38895	0.257914	5.38535	7.23044e-08	1.70509e-06
Star	167.665	167.7	154.924	164.896	144.447	150.246	9689.08	12063.9	163.796	5511.91	0.0297168	1500.75	5.07258	0.94248	5.38216	7.3598e-08	1.73366e-06
Apcs	33.1542	15.8635	29.9519	21.1405	0	0.878634	0.937411	0	25.0275	0.454011	55.1253	15.0003	-5.7711	1.07748	-5.35612	8.50281e-08	1.99844e-06
Gdpd2	8.52536	4.53244	7.22978	4.22809	39.9129	21.9659	22.4979	25.8031	6.12892	27.5449	0.222506	19.2108	2.14774	0.40353	5.32238	1.02417e-07	2.3754e-06
Gcm1	71.0447	52.123	65.068	50.7371	104.534	123.887	125.613	126.251	59.7432	120.071	0.497564	98.5183	1.00242	0.188429	5.31987	1.03842e-07	2.40581e-06
Gm33587	17.0507	19.2629	30.9848	23.2545	1.90061	5.2718	2.81223	3.68616	22.6382	3.4177	6.62381	13.1604	-2.7154	0.510574	-5.31832	1.04728e-07	2.42368e-06
Slc22a12	16948.4	35413.1	37752.9	35832	14382.9	16220.5	9725.64	5245.41	31486.6	11393.6	2.76353	26048.3	-1.4665	0.276182	-5.3099	1.09687e-07	2.53565e-06
2810032G03Rik	5.68357	3.39933	8.2626	5.28511	28.5092	26.359	26.2475	36.8616	5.65765	29.4943	0.191822	17.0237	2.37262	0.449297	5.28074	1.28662e-07	2.95488e-06
Pigr	6221.62	5654.22	9196.27	5724.84	4480.69	2140.35	1597.35	1553.72	6699.24	2443.03	2.74219	4075.3	-1.45538	0.275599	-5.2808	1.28621e-07	2.95488e-06
2010203P06Rik	39.785	29.4608	54.7397	26.4256	96.9312	79.9557	96.5534	90.3109	37.6028	90.9378	0.4135	61.8366	1.2684	0.240206	5.28045	1.28865e-07	2.95632e-06
Ptpn22	238.71	176.765	160.088	162.782	114.987	69.4121	82.4922	99.5263	184.586	91.6044	2.01504	121.393	-1.01441	0.192339	-5.27405	1.33446e-07	3.04489e-06
Fgl1	39.785	46.4575	29.9519	41.2239	122.59	96.6497	85.3044	108.742	39.3546	103.321	0.380895	76.6356	1.39436	0.265122	5.25931	1.44596e-07	3.27804e-06
LOC108168991	9.47262	14.7304	28.9191	19.0264	0.950306	0	0	0	18.0371	0.237577	75.9214	6.82581	-6.01038	1.14676	-5.2412	1.59533e-07	3.60503e-06
Gm34119	4.73631	1.13311	3.09848	2.11405	24.708	20.2086	21.5605	15.6662	2.77049	20.5358	0.13491	11.8936	2.8532	0.544895	5.23623	1.6389e-07	3.69953e-06
Ankmy1	18.9452	19.2629	17.558	8.45618	39.9129	41.2958	54.3699	52.5278	16.0556	47.0266	0.341415	32.3491	1.54816	0.296431	5.22266	1.76369e-07	3.97273e-06
Galr2	16.1035	35.1264	28.9191	31.7107	79.8257	74.6839	68.431	51.6062	27.9649	68.6367	0.407434	54.2016	1.3072	0.250592	5.21644	1.824e-07	4.09545e-06
Trpc4	12.3144	5.66555	10.3283	11.6273	24.708	22.8445	76.8677	88.4679	9.98387	53.222	0.187589	24.5141	2.40522	0.462877	5.19623	2.03367e-07	4.53727e-06
D7Ertd443e	38.8378	29.4608	23.755	24.3115	90.2791	101.043	74.0555	58.057	29.0913	80.8586	0.359779	49.799	1.47093	0.283968	5.17993	2.21975e-07	4.91606e-06
Gm6300	2393.73	1453.78	1782.66	1344.53	145.397	73.8053	153.735	153.897	1743.68	131.709	13.2389	894.476	-3.72686	0.719974	-5.17639	2.26223e-07	5.00489e-06
Kcna1	35.0487	31.7271	19.6237	19.0264	79.8257	88.742	89.0541	82.0171	26.3565	84.9097	0.310406	56.9743	1.68604	0.326204	5.16866	2.35782e-07	5.19459e-06
Gm10638	28.4179	29.4608	26.8535	21.1405	8.55276	6.15044	5.62447	7.37232	26.4682	6.925	3.82212	16.3771	-1.93689	0.378173	-5.1217	3.028e-07	6.54805e-06
Slc52a3	476.473	756.917	780.816	768.456	419.085	408.565	339.343	211.954	695.665	344.737	2.01796	562.426	-1.01231	0.199072	-5.08515	3.67338e-07	7.8711e-06
C3	1464.47	1334.8	1512.06	1470.32	3559.85	2439.09	4367.4	3922.07	1445.41	3572.1	0.404639	1949.44	1.30523	0.256885	5.08101	3.75439e-07	8.02837e-06
Nrxn1	4.73631	5.66555	6.19695	1.05702	17.1055	14.0581	44.0583	41.4693	4.41396	29.1728	0.151304	15.4294	2.72361	0.536084	5.08056	3.76322e-07	8.03912e-06
Dscam	5.68357	5.66555	3.09848	1.05702	38.0122	22.8445	23.4353	19.3523	3.87615	25.9111	0.149594	13.8077	2.7356	0.539017	5.07517	3.87155e-07	8.25383e-06
Wdr81	1652.97	3495.64	2973.5	3214.41	1325.68	1453.26	1450.18	762.114	2834.13	1247.81	2.27129	2212.17	-1.18335	0.233455	-5.06885	4.00233e-07	8.52403e-06
Apoc1	39.785	37.3926	41.313	34.8818	150.148	113.344	110.615	105.056	38.3431	119.791	0.320084	59.519	1.64253	0.324827	5.05663	4.26725e-07	9.06995e-06
Pck1	34760.7	42157.3	50369.8	48745.7	121655	115918	69800.6	60100.1	44008.4	91868.6	0.479037	79691.1	1.0618	0.211721	5.01507	5.30151e-07	1.11448e-05
Gm34628	0	0	0	0	7.60245	11.4222	14.9986	9.2154	0	10.8097	0	4.08098	5.82023	1.16395	5.00041	5.72095e-07	1.19907e-05
Cfap44	35.0487	40.7919	44.4115	42.2809	11.4037	15.8154	11.2489	20.2739	40.6333	14.6855	2.7669	23.5306	-1.46313	0.292682	-4.99904	5.76167e-07	1.20641e-05
Gm36003	22.7343	29.4608	34.0832	16.9124	5.70184	6.15044	1.87482	3.68616	25.7977	4.35331	5.92599	14.2981	-2.56121	0.512748	-4.99507	5.88136e-07	1.22903e-05
Slc13a5	18.9452	41.925	32.0176	21.1405	7.60245	2.6359	5.62447	4.6077	28.5071	5.11763	5.57037	21.6733	-2.48084	0.496644	-4.9952	5.87744e-07	1.22903e-05
Gm41812	8.52536	12.4642	5.16413	6.34214	39.9129	28.9949	26.2475	40.5478	8.12396	33.9258	0.239463	20.9141	2.06997	0.414894	4.98914	6.06475e-07	1.26485e-05
Gm33049	16.1035	30.594	24.7878	33.8247	0.950306	2.6359	7.49929	4.6077	26.3275	3.9233	6.71055	16.6002	-2.74415	0.551016	-4.98018	6.35267e-07	1.31536e-05
Gatsl3	155.351	284.41	318.11	319.221	129.242	156.397	124.676	86.6248	269.273	124.235	2.16745	198.298	-1.11408	0.22446	-4.9634	6.92696e-07	1.4208e-05
Extl1	90.9372	193.762	159.055	150.097	71.273	71.1694	69.3684	47.9201	148.463	64.9327	2.28641	97.882	-1.19005	0.240346	-4.95139	7.36862e-07	1.50554e-05
Fat3	50.2049	47.5906	34.0832	36.9958	94.0803	74.6839	85.3044	120.722	42.2186	93.6976	0.450584	52.4061	1.1484	0.2322	4.94573	7.58575e-07	1.54213e-05
Adh7	163.876	164.301	174.547	170.181	19.9564	26.359	60.9317	96.7617	168.226	51.0022	3.29841	103.483	-1.72214	0.348857	-4.93653	7.95265e-07	1.60775e-05
Mroh7	181.874	373.926	292.289	346.704	120.689	98.407	173.421	97.6833	298.698	122.55	2.43736	197.669	-1.28476	0.260461	-4.93264	8.11242e-07	1.63626e-05
Gm2115	44.5213	52.123	53.7069	49.6801	84.5773	82.5916	146.236	117.957	50.0078	107.841	0.46372	73.1997	1.10972	0.225218	4.92733	8.3359e-07	1.67879e-05
Nek5	43.5741	28.3277	43.3787	40.1669	92.1797	86.1061	76.8677	76.4878	38.8618	82.9104	0.468721	55.8477	1.08708	0.221596	4.90569	9.30995e-07	1.85373e-05
Nt5c1a	70.0974	80.4508	48.5428	91.961	119.739	136.188	194.982	198.131	72.763	162.26	0.448435	102.003	1.15862	0.236422	4.90064	9.5525e-07	1.89488e-05
Sp5	131.669	188.096	207.598	219.861	97.8815	109.829	96.5534	48.8416	186.806	88.2764	2.11615	152.58	-1.07961	0.220557	-4.89492	9.83449e-07	1.94568e-05
Frmd5	5.68357	6.79866	6.19695	5.28511	10.4534	7.02907	137.799	119.8	5.99107	68.7705	0.0871169	21.8169	3.52208	0.720267	4.88995	1.00859e-06	1.98761e-05
Sec14l4	11.3671	37.3926	30.9848	33.8247	8.55276	7.02907	7.49929	3.68616	28.3923	6.69182	4.24284	17.6884	-2.07761	0.424976	-4.88878	1.01461e-06	1.99762e-05
Adig	27.4706	19.2629	23.755	22.1975	36.1116	107.193	79.68	83.8602	23.1715	76.7113	0.302061	44.0196	1.72467	0.352929	4.88672	1.02528e-06	2.01486e-05
Kcnk3	36.9432	36.2595	32.0176	28.5396	43.7141	64.1403	677.748	570.433	33.44	339.009	0.0986404	114.138	3.34152	0.684265	4.88337	1.04288e-06	2.04564e-05
Gm35778	231.132	191.495	254.075	147.983	95.9809	72.9266	94.6785	113.349	206.171	94.2339	2.18787	140.098	-1.13112	0.232052	-4.87446	1.09109e-06	2.13227e-05
Trim6	14.2089	14.7304	21.6893	22.1975	59.8693	50.9608	35.6216	50.6847	18.2065	49.2841	0.36942	30.736	1.43795	0.295169	4.87161	1.10694e-06	2.15726e-05
E030011O05Rik	27.4706	47.5906	44.4115	32.7677	68.422	76.4412	91.8663	70.9586	38.0601	76.922	0.494788	64.4348	1.02378	0.210674	4.85956	1.17649e-06	2.27183e-05
Srd5a2	166.718	241.352	387.309	275.883	79.8257	82.5916	153.735	146.525	267.816	115.669	2.31535	154.96	-1.21113	0.250355	-4.83764	1.31393e-06	2.51421e-05
Lgals12	64.4138	56.6555	49.5756	44.395	106.434	136.188	132.175	117.036	53.76	122.958	0.437221	80.2668	1.19226	0.246473	4.83731	1.3161e-06	2.51608e-05
Gm40031	0	0	0	1.05702	11.4037	15.8154	14.0612	11.0585	0.264256	13.0847	0.0201958	6.79578	5.37537	1.11428	4.82405	1.4067e-06	2.66994e-05
Gm33467	82.4118	157.502	63.0023	56.0222	20.9067	17.5727	17.8108	19.3523	89.7346	18.9106	4.74519	50.5887	-2.24535	0.466094	-4.81737	1.45465e-06	2.75353e-05
Fgb	64.4138	37.3926	55.7726	47.566	135.894	108.072	97.4908	80.174	51.2863	105.408	0.486552	71.4906	1.0317	0.214634	4.80679	1.53369e-06	2.88012e-05
Scarb1	255.761	397.721	387.309	395.327	495.11	516.637	1022.72	916.932	359.03	737.849	0.48659	481.803	1.03995	0.216454	4.80448	1.55154e-06	2.91083e-05
Gm33906	19.8925	15.8635	19.6237	15.8553	0.950306	0	0	0.92154	17.8088	0.467962	38.056	8.6445	-5.27394	1.09789	-4.80369	1.5577e-06	2.91978e-05
B230216N24Rik	99.4625	112.178	83.6588	91.961	35.1613	39.5385	47.808	59.9001	96.8151	45.602	2.12304	70.7168	-1.08513	0.226009	-4.80128	1.57651e-06	2.95243e-05
Sptlc3	80.5173	74.7852	70.2321	40.1669	188.161	150.246	100.303	117.957	66.4254	139.167	0.477308	102.599	1.06521	0.222059	4.79697	1.61087e-06	3.01143e-05
Gulo	11.3671	20.396	8.2626	17.9694	37.0619	65.0189	40.3087	44.2339	14.4988	46.6559	0.31076	43.2952	1.69903	0.356967	4.75964	1.93939e-06	3.57803e-05
Synpr	15.1562	40.7919	150.792	131.071	0.950306	0.878634	5.62447	11.0585	84.4529	4.62797	18.2483	33.1999	-4.19096	0.881249	-4.7557	1.9776e-06	3.63583e-05
Sec14l3	619.51	494.036	693.026	545.424	1835.04	1211.64	1314.25	1294.76	587.999	1413.92	0.415863	1087.26	1.26557	0.266159	4.75494	1.98508e-06	3.64476e-05
Mgarp	1.89452	2.26622	2.06565	0	2.85092	3.51454	287.785	317.01	1.5566	152.79	0.0101878	39.4078	6.6171	1.39733	4.73553	2.18485e-06	3.97529e-05
Akr1b7	91.8844	79.3177	93.9871	76.1057	123.54	138.824	740.555	1123.36	85.3237	531.569	0.160513	197.895	2.63898	0.55757	4.73299	2.21236e-06	4.01152e-05
Gm33050	77.6755	77.0514	56.8054	56.0222	27.5589	10.5436	27.1849	33.1754	66.8886	24.6157	2.71731	40.7673	-1.44676	0.30617	-4.72533	2.29743e-06	4.1444e-05
Gm30789	136.406	133.707	144.596	137.413	74.1239	63.2617	61.8691	65.4294	138.03	66.171	2.08596	93.6937	-1.06129	0.22468	-4.72358	2.31734e-06	4.17119e-05
Gm36231	16.1035	10.198	18.5909	15.8553	58.919	44.8103	37.4965	33.1754	15.1869	43.6003	0.348321	29.7045	1.51387	0.320782	4.71931	2.36645e-06	4.25437e-05
D430041D05Rik	2.84179	5.66555	2.06565	4.22809	11.4037	16.694	62.8066	44.2339	3.70027	33.7846	0.109525	13.6714	3.20315	0.679253	4.7157	2.40883e-06	4.32132e-05
Gm36394	45.4686	44.1913	88.823	93.018	21.857	17.5727	28.1223	23.0385	67.8752	22.6476	2.99701	45.9106	-1.58501	0.336119	-4.71561	2.40983e-06	4.32132e-05
Gm40925	38.8378	30.594	21.6893	45.452	88.3785	80.8343	81.5548	82.0171	34.1433	83.1962	0.410395	68.0746	1.28286	0.272346	4.7104	2.47233e-06	4.42588e-05
Gm39544	33.1542	23.7953	22.7222	35.9388	1.90061	7.02907	12.1863	6.45078	28.9026	6.8917	4.19383	18.4131	-2.06842	0.439507	-4.70623	2.52336e-06	4.50956e-05
Peg10	21.787	23.7953	26.8535	13.7413	31.3601	30.7522	454.644	308.716	21.5443	206.368	0.104397	72.8955	3.25974	0.692785	4.70527	2.53526e-06	4.527e-05
Dnajb3	22.7343	12.4642	12.3939	7.39916	26.6086	44.8103	61.8691	56.2139	13.7479	47.3755	0.29019	29.7192	1.77299	0.37858	4.68327	2.82331e-06	4.9865e-05
Gm41432	21.787	43.0582	44.4115	40.1669	8.55276	8.78634	1.87482	3.68616	37.3559	5.72502	6.52502	20.6947	-2.70076	0.579566	-4.65997	3.16254e-06	5.5347e-05
Daw1	1.89452	5.66555	4.1313	4.22809	17.1055	26.359	22.4979	15.6662	3.97987	20.4071	0.195023	12.0923	2.38325	0.511723	4.65732	3.20354e-06	5.60182e-05
Slc43a1	40.7323	22.6622	36.1489	34.8818	75.0742	69.4121	72.1807	71.8801	33.6063	72.1368	0.465869	56.9588	1.09323	0.235547	4.64124	3.46327e-06	6.02604e-05
Cyp21a1	0	2.26622	1.03283	0	0.950306	0.878634	5431.36	3809.65	0.824761	2310.71	0.00035693	577.994	11.4682	2.47336	4.63667	3.54066e-06	6.15562e-05
Syt1	7.5781	9.06488	6.19695	5.28511	15.2049	28.1163	47.808	34.097	7.03126	31.3065	0.224594	16.715	2.15759	0.465378	4.63622	3.54833e-06	6.16386e-05
Mc2r	9.47262	4.53244	7.22978	5.28511	7.60245	7.90771	119.989	152.054	6.62999	71.8882	0.0922263	21.9157	3.43179	0.741292	4.62947	3.66597e-06	6.35776e-05
Gm39623	17.998	14.7304	20.6565	19.0264	0.950306	2.6359	5.62447	1.84308	18.1028	2.76344	6.55083	11.7989	-2.71333	0.586463	-4.6266	3.71711e-06	6.43059e-05
Gm15713	248.183	432.848	197.27	263.199	86.4779	65.0189	114.364	136.388	285.375	100.562	2.83779	196.829	-1.50445	0.325354	-4.62404	3.76345e-06	6.50544e-05
Gm30162	17.998	9.06488	5.16413	13.7413	37.0619	35.1454	39.3713	36.8616	11.4921	37.11	0.309675	22.0053	1.67787	0.363373	4.61748	3.88429e-06	6.69239e-05
Bdkrb2	23.6816	21.5291	27.8863	25.3686	44.6644	51.8394	59.9943	69.1155	24.6164	56.4034	0.436434	33.548	1.19485	0.258952	4.61417	3.94667e-06	6.77223e-05
Bcl6	554.148	1486.64	3126.36	2615.07	424.787	467.433	761.178	532.65	1945.56	546.512	3.55995	1193.56	-1.83183	0.397243	-4.61135	4.00057e-06	6.8581e-05
Gm31278	2.84179	2.26622	1.03283	2.11405	15.2049	11.4222	22.4979	12.9016	2.06372	15.5066	0.133086	8.46342	2.89964	0.628847	4.61105	4.00646e-06	6.8581e-05
Serpina6	0.947262	1.13311	0	1.05702	20.9067	17.5727	13.1238	15.6662	0.784349	16.8173	0.0466393	7.57183	4.43145	0.961932	4.60682	4.08875e-06	6.98763e-05
Hsbp1l1	51.1522	70.2528	54.7397	49.6801	148.248	146.732	111.552	106.899	56.4562	128.358	0.439835	90.1003	1.18784	0.258359	4.59764	4.27295e-06	7.28652e-05
Steap3	91.8844	234.554	221.025	198.72	443.793	376.934	420.898	296.736	186.546	384.59	0.485051	313.798	1.04634	0.227586	4.59756	4.2746e-06	7.28652e-05
Alb	259.55	479.305	237.55	196.606	1275.31	600.107	460.269	558.453	293.253	723.535	0.405306	427.017	1.30379	0.284159	4.58823	4.47011e-06	7.59632e-05
Rims4	0	3.39933	1.03283	2.11405	4.75153	5.2718	141.549	163.113	1.63655	78.6713	0.0208024	22.0976	5.61285	1.22411	4.58526	4.53426e-06	7.69294e-05
9530052C20Rik	19.8925	19.2629	17.558	21.1405	44.6644	51.8394	39.3713	46.9985	19.4635	45.7184	0.425725	32.0289	1.2331	0.26905	4.58318	4.5795e-06	7.74022e-05
Fam131c	23.6816	57.7886	42.3458	53.9082	18.0558	19.3299	17.8108	10.1369	44.431	16.3334	2.72026	30.9932	-1.43507	0.313546	-4.5769	4.71908e-06	7.96808e-05
Rasl10b	12.3144	5.66555	15.4924	8.45618	28.5092	28.1163	48.7454	34.097	10.4821	34.867	0.300632	28.5026	1.7202	0.376019	4.57476	4.76758e-06	8.03711e-05
Tub	1.89452	3.39933	4.1313	9.51321	12.354	10.5436	59.0569	69.1155	4.73459	37.7675	0.125361	15.4318	3.00279	0.656578	4.57339	4.79902e-06	8.08365e-05
Gm40260	27.4706	30.594	36.1489	50.7371	94.0803	91.3779	67.4936	59.9001	36.2376	78.213	0.46332	51.6392	1.11274	0.243328	4.57301	4.80757e-06	8.09159e-05
3110045C21Rik	290.81	129.174	199.335	187.093	82.6766	90.4993	64.6814	118.879	201.603	89.184	2.26053	153.921	-1.17843	0.258196	-4.56409	5.01664e-06	8.40994e-05
Gm30173	15.1562	27.1946	24.7878	15.8553	3.80122	3.51454	7.49929	3.68616	20.7485	4.6253	4.48587	10.9971	-2.16353	0.4743	-4.56152	5.07857e-06	8.49352e-05
Mlxipl	1642.55	3044.66	2763.84	2651.01	1146.07	1063.15	1587.97	1160.22	2525.52	1239.35	2.03777	1872.33	-1.02689	0.225889	-4.546	5.46743e-06	9.07655e-05
Gm33009	15.1562	7.93177	6.19695	16.9124	38.9626	33.3881	57.1821	30.4108	11.5493	39.9859	0.288835	23.8287	1.78259	0.392253	4.5445	5.50669e-06	9.12995e-05
LOC102632031	85.2536	55.5224	63.0023	61.3073	28.5092	30.7522	38.4339	32.2539	66.2714	32.4873	2.03992	51.2045	-1.0342	0.228044	-4.53508	5.75815e-06	9.51695e-05
Ido2	176.191	281.011	230.32	215.633	110.236	131.795	110.615	97.6833	225.789	112.582	2.00555	161.923	-1.00196	0.220955	-4.53467	5.76947e-06	9.52821e-05
Gm6981	28.4179	29.4608	27.8863	22.1975	6.65214	7.02907	14.0612	6.45078	26.9906	8.54829	3.15743	19.9412	-1.66179	0.366919	-4.52904	5.92521e-06	9.7321e-05
Apoh	254.814	226.622	338.767	285.396	29.4595	0.878634	0.937411	1.84308	276.4	8.27965	33.383	180.175	-5.06446	1.11846	-4.52808	5.95218e-06	9.7688e-05
Igfbp1	357.118	205.093	163.186	214.576	637.655	575.505	334.656	437.732	234.993	496.387	0.473407	349.885	1.07727	0.238951	4.50833	6.53385e-06	0.000105998
Cntnap5a	240.605	262.881	304.683	254.743	0.950306	0.878634	30.9346	28.5677	265.728	15.3328	17.3307	150.511	-4.11609	0.915134	-4.49779	6.86624e-06	0.000110457
Rfx4	0	2.26622	2.06565	1.05702	15.2049	13.1795	14.9986	11.98	1.34722	13.8408	0.0973374	7.71387	3.40642	0.758847	4.48894	7.15788e-06	0.000114798
Shc2	7.5781	9.06488	9.29543	12.6843	29.4595	28.9949	42.1835	21.1954	9.65567	30.4583	0.317012	21.7767	1.66115	0.370241	4.48668	7.23429e-06	0.000115847
Anxa8	35.0487	20.396	35.1161	15.8553	68.422	65.8976	74.0555	72.8017	26.604	70.2942	0.378467	44.0791	1.39387	0.310802	4.48475	7.29995e-06	0.00011681
Thsd7b	3.78905	1.13311	3.09848	5.28511	18.0558	21.0872	11.2489	19.3523	3.32644	17.4361	0.190779	8.9843	2.37574	0.530037	4.48222	7.38717e-06	0.00011776
LOC108168025	4.73631	10.198	10.3283	12.6843	35.1613	27.2377	29.9972	26.7247	9.48671	29.7802	0.318557	19.5816	1.66284	0.371052	4.48141	7.41517e-06	0.000118117
Nrep	467	273.079	312.946	322.392	719.382	679.184	677.748	782.388	343.854	714.675	0.481134	505.025	1.05446	0.236064	4.46683	7.93856e-06	0.000125789
Lrp2bp	10.4199	5.66555	5.16413	7.39916	29.4595	16.694	29.0597	31.3324	7.16218	26.6364	0.268887	16.1897	1.87912	0.420854	4.46501	8.00649e-06	0.000126581
Gm37548	10.4199	24.9284	16.5252	19.0264	0.950306	0	6.56188	5.52924	17.725	3.26036	5.43651	12.8246	-2.4448	0.547636	-4.46428	8.03388e-06	0.000126729
D14Ertd670e	20.8398	18.1298	12.3939	7.39916	0.950306	0	0.937411	0	14.6906	0.471929	31.1289	6.93638	-4.99581	1.1246	-4.44232	8.89942e-06	0.000138621
Cd1d1	120.302	69.1197	89.8558	93.018	121.639	148.489	361.841	389.811	93.0739	255.445	0.36436	142.087	1.45459	0.32749	4.44162	8.92833e-06	0.000138969
Stk32b	96.6208	213.025	135.3	137.413	365.868	344.425	276.536	258.031	145.59	311.215	0.46781	239.639	1.09902	0.248462	4.42328	9.72152e-06	0.000150759
LOC105247294	22.7343	50.9899	26.8535	35.9388	6.65214	6.15044	14.0612	11.0585	34.1291	9.48056	3.59991	21.3963	-1.84443	0.417006	-4.42304	9.73231e-06	0.000150815
Tmem88b	75.781	86.1163	87.7901	73.9916	23.7577	20.2086	44.0583	47.9201	80.9198	33.9862	2.38096	55.1572	-1.25265	0.284351	-4.4053	1.05639e-05	0.000162272
Nusap1	177.138	105.379	131.169	114.158	72.2233	43.0531	72.1807	70.0371	131.961	64.3735	2.04993	98.3995	-1.04037	0.236778	-4.39387	1.11353e-05	0.000170305
Gm38505	33.1542	44.1913	12.3939	30.6537	0	0	0.937411	8.29386	30.0983	2.30782	13.0419	16.2168	-3.70527	0.843447	-4.39301	1.11794e-05	0.000170856
Ankrd31	0.947262	0	0	0	17.1055	6.15044	14.0612	14.7446	0.236816	13.0154	0.018195	4.84353	5.36437	1.22241	4.38835	1.14216e-05	0.000174305
Ffar3	16.1035	19.2629	17.558	24.3115	2.85092	3.51454	5.62447	4.6077	19.309	4.14941	4.65343	12.5783	-2.21683	0.505552	-4.38496	1.16004e-05	0.000176652
Prune2	59.6775	35.1264	35.1161	42.2809	80.776	65.8976	104.99	152.976	43.0502	101.16	0.425566	65.1411	1.22676	0.280328	4.37615	1.20793e-05	0.000182757
Gm31651	87.1481	58.9217	121.873	85.6189	37.0619	19.3299	49.6828	38.7047	88.3905	36.1948	2.44207	64.6426	-1.29277	0.295786	-4.37064	1.23881e-05	0.000187027
Clstn3	36.9432	37.3926	38.2145	33.8247	48.4656	96.6497	113.427	77.4094	36.5938	83.9879	0.435703	57.043	1.1994	0.274513	4.36918	1.24714e-05	0.000188024
Slfn9	57.783	38.5257	50.6084	40.1669	112.136	68.5335	106.865	124.408	46.771	102.986	0.454151	64.1127	1.13324	0.259591	4.36547	1.26847e-05	0.000191095
Cbr3	25.5761	19.2629	21.6893	31.7107	57.9687	79.0771	50.6202	37.7831	24.5597	56.3623	0.435748	39.2752	1.1974	0.274413	4.3635	1.27997e-05	0.000192551
Unc80	4.73631	2.26622	3.09848	1.05702	11.4037	10.5436	35.6216	31.3324	2.78951	22.2253	0.12551	7.36346	2.97307	0.681554	4.3622	1.2876e-05	0.000193424
Trim61	35.996	29.4608	22.7222	36.9958	63.6705	57.1112	49.6828	82.0171	31.2937	63.1204	0.495778	48.5177	1.00931	0.232001	4.35044	1.35864e-05	0.000202941
Ppm1j	54.9412	91.7819	102.25	83.5048	49.4159	27.2377	46.8706	40.5478	83.1194	41.018	2.02641	59.9581	-1.01875	0.234223	-4.34947	1.3647e-05	0.000203701
Tacr2	0	0	0	1.05702	0	2.6359	70.3058	62.6647	0.264256	33.9016	0.00779478	8.7134	6.74722	1.55145	4.34898	1.36773e-05	0.00020401
Gsg1l	6.63084	7.93177	9.29543	6.34214	10.4534	18.4513	68.431	58.9786	7.55004	39.0786	0.193202	16.5432	2.37293	0.545805	4.34758	1.3765e-05	0.000204883
Trank1	17.998	12.4642	14.4596	12.6843	17.1055	19.3299	192.169	249.737	14.4015	119.586	0.120428	40.477	3.05174	0.702803	4.34224	1.41039e-05	0.000209632
Gm14957	17.0507	21.5291	9.29543	13.7413	0.950306	4.39317	0.937411	0.92154	15.4041	1.80061	8.55497	8.81751	-3.07071	0.708483	-4.33421	1.46284e-05	0.000216665
Tmem35	243.446	138.239	187.974	156.439	244.229	272.377	433.084	510.533	181.525	365.056	0.497253	253.798	1.00578	0.23319	4.31314	1.60949e-05	0.000235738
Them6	80.5173	177.898	154.924	157.496	331.657	375.177	293.41	176.936	142.709	294.295	0.484918	241.833	1.04715	0.243388	4.30239	1.68965e-05	0.000245774
Gm33472	11.3671	3.39933	11.3611	6.34214	29.4595	24.6018	25.3101	30.4108	8.11742	27.4455	0.295765	19.7138	1.73603	0.403696	4.30033	1.70545e-05	0.00024763
Gxylt2	11.3671	7.93177	8.2626	11.6273	22.8073	30.7522	29.0597	30.4108	9.79719	28.2575	0.346711	19.5393	1.52297	0.35426	4.29902	1.71556e-05	0.000248685
Glrb	9.47262	1.13311	5.16413	6.34214	14.2546	15.8154	33.7468	39.6262	5.528	25.8608	0.21376	12.2978	2.19855	0.511806	4.29568	1.7416e-05	0.000252287
LOC102635707	20.8398	16.9966	25.8206	25.3686	4.75153	3.51454	6.56188	11.0585	22.2564	6.47161	3.43908	12.3516	-1.78729	0.416694	-4.28922	1.79301e-05	0.000259023
Gm39902	25.5761	10.198	14.4596	28.5396	1.90061	0.878634	2.81223	6.45078	19.6933	3.01057	6.5414	10.1516	-2.71866	0.633995	-4.28814	1.80172e-05	0.000259925
Ptpn5	2.84179	3.39933	13.4267	7.39916	48.4656	26.359	28.1223	14.7446	6.76675	29.4229	0.229982	18.6953	2.12002	0.495546	4.27815	1.88453e-05	0.00027021
Rpl3l	32.2069	43.0582	45.4443	51.7941	8.55276	10.5436	16.8734	21.1954	43.1259	14.2913	3.01763	29.7255	-1.59191	0.372675	-4.27158	1.94093e-05	0.000277919
Atp1a3	3.78905	6.79866	9.29543	3.17107	14.2546	19.3299	70.3058	26.7247	5.76355	32.6538	0.176505	15.2551	2.50708	0.589009	4.25644	2.07708e-05	0.000295609
Mrap	22.7343	26.0615	30.9848	45.452	38.0122	65.8976	175.296	113.349	31.3081	98.1388	0.319019	52.3798	1.64938	0.388679	4.24356	2.2e-05	0.00031059
Skint11	3.78905	19.2629	12.3939	17.9694	0	0	0	0.92154	13.3538	0.230385	57.963	5.87607	-5.57395	1.3165	-4.23391	2.29664e-05	0.000322722
Arxes2	44.5213	9.06488	16.5252	9.51321	47.5153	75.5625	56.2447	60.8217	19.9062	60.036	0.33157	35.7934	1.57295	0.371576	4.2332	2.30387e-05	0.000323523
Aacs	2772.64	5111.46	5665.05	6613.79	2757.79	2923.22	2531.01	1446.82	5040.73	2414.71	2.08751	4473.47	-1.06172	0.251187	-4.22681	2.37026e-05	0.000331742
Iqca	0.947262	2.26622	3.09848	3.17107	14.2546	10.5436	14.9986	14.7446	2.37076	13.6354	0.173868	8.58546	2.53908	0.600853	4.2258	2.38098e-05	0.000332801
Gprin2	29.3651	14.7304	22.7222	24.3115	70.3227	72.048	48.7454	31.3324	22.7823	55.6121	0.409665	35.1253	1.27923	0.303864	4.20987	2.55513e-05	0.000355027
Greb1	14.2089	12.4642	13.4267	10.5702	15.2049	21.0872	82.4922	92.154	12.6675	52.7346	0.240213	33.4409	2.05535	0.488753	4.20528	2.60757e-05	0.000361125
Gm34717	60.6248	28.3277	37.1817	35.9388	11.4037	16.694	17.8108	16.5877	40.5183	15.6241	2.59332	25.0479	-1.38087	0.328861	-4.19895	2.68151e-05	0.000369908
Pdilt	84.3063	63.4541	77.4619	67.6495	200.515	174.848	87.1792	132.702	73.218	148.811	0.49202	108.074	1.02113	0.243825	4.18797	2.81459e-05	0.000386247
Gng7	15.1562	23.7953	24.7878	28.5396	46.565	45.689	50.6202	51.6062	23.0697	48.6201	0.474489	34.5595	1.08334	0.258876	4.18478	2.85443e-05	0.000390951
Ccl28	2673.17	1569.36	3123.26	3211.24	499.861	414.715	733.993	977.754	2644.26	656.581	4.02731	1788.15	-2.00987	0.484166	-4.15119	3.30744e-05	0.000447479
Rgs14	14.2089	13.5973	18.5909	19.0264	61.7699	34.2667	41.2461	23.0385	16.3559	40.0803	0.408078	33.9233	1.29026	0.311108	4.1473	3.36424e-05	0.000454582
Tas2r119	16.1035	15.8635	11.3611	12.6843	1.90061	4.39317	2.81223	0.92154	14.0031	2.50689	5.58584	7.79699	-2.47094	0.59668	-4.14114	3.45584e-05	0.000466064
Krt5	31.2597	62.321	60.9367	36.9958	113.086	143.217	120.926	72.8017	47.8783	112.508	0.425555	86.6401	1.23746	0.299083	4.13752	3.51087e-05	0.000472579
Sidt1	17.0507	13.5973	8.2626	5.28511	47.5153	22.8445	27.1849	32.2539	11.0489	32.4497	0.340495	18.1213	1.544	0.373193	4.13727	3.51466e-05	0.000472788
Aspdh	513.416	1480.97	1483.14	1479.83	636.705	620.316	694.622	322.539	1239.34	568.545	2.17984	1037.79	-1.12395	0.272046	-4.13145	3.60478e-05	0.000483064
Gm30145	31.2597	29.4608	28.9191	28.5396	9.50306	15.8154	8.4367	7.37232	29.5448	10.2819	2.87348	21.8368	-1.51716	0.367275	-4.13086	3.61414e-05	0.000483703
Podxl2	14.2089	38.5257	22.7222	26.4256	67.4717	50.0821	52.495	48.8416	25.4706	54.7226	0.465449	37.4721	1.11786	0.271048	4.1242	3.7202e-05	0.000496953
Gm31279	26.5233	20.396	37.1817	20.0834	10.4534	6.15044	11.2489	9.2154	26.0461	9.26704	2.81062	17.2021	-1.50029	0.36459	-4.115	3.87183e-05	0.000513632
Gm40939	36.9432	66.8535	41.313	36.9958	146.347	120.373	72.1807	75.5663	45.5264	103.617	0.439373	73.7819	1.19175	0.289787	4.11251	3.91377e-05	0.000517991
Stra6	65.3611	117.843	79.5275	58.1363	214.769	165.183	195.919	199.053	80.2171	193.731	0.414064	138.717	1.27448	0.31059	4.1034	4.07121e-05	0.000535704
Vsnl1	0	0	1.03283	0	5.70184	2.6359	18.7482	18.4308	0.258206	11.3792	0.0226911	3.94184	5.17088	1.26316	4.09362	4.2469e-05	0.000555016
Frmd8os	135.459	128.041	85.7245	91.961	33.2607	36.9026	59.0569	58.9786	110.296	47.0497	2.34425	72.0317	-1.22985	0.301998	-4.07238	4.65355e-05	0.000603304
Upk3a	46.4159	83.8501	55.7726	45.452	180.558	189.785	109.677	59.9001	57.8726	134.98	0.428749	110.304	1.22594	0.301548	4.06549	4.79315e-05	0.000619121
Ccdc150	27.4706	30.594	16.5252	38.0528	7.60245	8.78634	3.74965	5.52924	28.1606	6.41692	4.3885	15.6466	-2.12947	0.524183	-4.06246	4.85587e-05	0.000625752
Gm39587	21.787	32.8602	16.5252	15.8553	7.60245	4.39317	7.49929	7.37232	21.7569	6.71681	3.23918	14.79	-1.69509	0.417259	-4.06243	4.85635e-05	0.000625752
Gm35391	8.52536	15.8635	22.7222	11.6273	0	4.39317	2.81223	0	14.6846	1.80135	8.15198	6.46991	-3.0023	0.743613	-4.03745	5.40353e-05	0.000686203
Lum	122.197	79.3177	102.25	72.9346	178.658	134.431	192.169	273.697	94.1747	194.739	0.483595	136.43	1.04515	0.258883	4.03715	5.41051e-05	0.000686676
Igdcc4	8.52536	10.198	11.3611	15.8553	28.5092	21.9659	45.9332	43.3124	11.4849	34.9301	0.328797	18.1894	1.60704	0.398332	4.03443	5.47348e-05	0.000693187
Gm38819	174.296	132.574	68.1665	86.6759	32.3104	37.7813	40.3087	40.5478	115.428	37.737	3.05875	69.4776	-1.61351	0.40115	-4.0222	5.76568e-05	0.000724348
Cfd	830.749	699.128	1359.2	555.994	1733.36	2864.35	4290.53	2831.89	861.267	2930.03	0.293945	1353.82	1.76633	0.439321	4.02059	5.80523e-05	0.000728882
Eddm3b	36.9432	12.4642	24.7878	32.7677	9.50306	7.90771	10.3115	7.37232	26.7407	8.77365	3.04785	19.7933	-1.61861	0.402914	-4.01725	5.88801e-05	0.000737959
Gm36237	33.1542	54.3893	50.6084	65.5354	19.0061	10.5436	25.3101	30.4108	50.9218	21.3177	2.38871	39.7514	-1.25597	0.312701	-4.01651	5.90668e-05	0.000738983
Dio2	46.4159	7.93177	35.1161	20.0834	43.7141	75.5625	135.925	112.428	27.3868	91.9073	0.297983	48.6381	1.73753	0.43449	3.99901	6.36075e-05	0.000790516
Kcna6	18.9452	28.3277	18.5909	20.0834	45.6147	60.6258	47.808	34.097	21.4868	47.0364	0.456813	34.4989	1.13917	0.284999	3.99709	6.41271e-05	0.000795003
Gm39078	97.568	62.321	56.8054	82.4478	20.9067	36.024	40.3087	46.077	74.7856	35.8291	2.08728	56.3301	-1.06339	0.266069	-3.99669	6.42349e-05	0.000795624
Gm35591	255.761	268.547	247.878	265.313	91.2294	89.6207	142.487	164.956	259.375	122.073	2.12475	181.774	-1.08746	0.273031	-3.98293	6.80719e-05	0.000836278
Kif1a	41.6795	48.7237	30.9848	26.4256	62.7202	40.4172	155.61	114.271	36.9534	93.2547	0.396263	55.077	1.33557	0.335561	3.98011	6.88835e-05	0.000844282
Adamts13	5.68357	5.66555	2.06565	2.11405	18.0558	28.9949	14.9986	11.98	3.8822	18.5073	0.209766	11.7214	2.25379	0.568103	3.96721	7.27175e-05	0.000883578
LOC105246186	98.5153	155.236	82.626	78.2197	46.565	41.2958	68.431	46.9985	103.649	50.8226	2.03943	74.1836	-1.02659	0.2599	-3.94995	7.81662e-05	0.000942191
Cited1	0.947262	2.26622	0	2.11405	9.50306	17.5727	9.37411	15.6662	1.33188	13.029	0.102224	9.4373	3.32115	0.841229	3.94798	7.88145e-05	0.000947988
Naaladl1	2.84179	12.4642	21.6893	12.6843	41.8135	60.6258	42.1835	21.1954	12.4199	41.4545	0.299603	46.5809	1.7492	0.443443	3.94458	7.99402e-05	0.000959192
Fasn	4700.32	9166.86	6074.04	7263.86	9968.71	18209.7	19392.2	8322.43	6801.27	13973.3	0.486734	10221.2	1.03885	0.263614	3.9408	8.12094e-05	0.000973314
Cyp4f15	33.1542	43.0582	30.9848	29.5966	11.4037	21.0872	12.1863	13.8231	34.1984	14.6251	2.33834	22.9083	-1.2156	0.30893	-3.93487	8.32419e-05	0.000994849
Gm31037	7.5781	18.1298	16.5252	8.45618	1.90061	1.75727	3.74965	1.84308	12.6723	2.31265	5.47956	7.57062	-2.4493	0.623712	-3.92698	8.60204e-05	0.0010239
Gm973	13.2617	7.93177	17.558	10.5702	38.9626	28.1163	24.3727	29.4893	12.3304	30.2352	0.407817	19.0911	1.2828	0.326773	3.92566	8.64936e-05	0.00102731
Homer2	21.787	26.0615	15.4924	17.9694	34.211	52.718	40.3087	39.6262	20.3276	41.716	0.487285	31.304	1.04373	0.266008	3.92368	8.72065e-05	0.00103491
Gm20616	28.4179	43.0582	14.4596	14.7983	6.65214	5.2718	3.74965	5.52924	25.1835	5.30071	4.75096	17.9626	-2.2459	0.572722	-3.92145	8.80194e-05	0.0010425
Gpr84	0.947262	2.26622	0	1.05702	8.55276	12.3009	13.1238	7.37232	1.06763	10.3374	0.103278	5.84464	3.31213	0.844871	3.92028	8.84454e-05	0.00104696
Ly6d	7.5781	52.123	35.1161	22.1975	79.8257	86.9848	115.302	63.5863	29.2537	86.4246	0.338488	55.0074	1.57287	0.401285	3.91958	8.87031e-05	0.00104942
Aff2	39.785	43.0582	16.5252	21.1405	46.565	71.1694	63.744	59.9001	30.1272	60.3446	0.499253	46.1811	1.00456	0.256368	3.91844	8.91252e-05	0.00105382
Mn1	92.8317	218.69	170.416	211.405	87.4282	92.2566	89.9915	65.4294	173.336	83.7764	2.06903	129.901	-1.04659	0.267992	-3.90532	9.41004e-05	0.00110584
Syn3	1559.19	1995.41	2176.16	1928.01	671.866	630.859	1278.63	1182.34	1914.69	940.923	2.03491	1486.68	-1.02497	0.26261	-3.90303	9.49972e-05	0.00111513
Gm34365	200.82	227.755	179.712	232.545	113.086	65.8976	102.178	112.428	210.208	98.3974	2.13631	151.674	-1.09568	0.28102	-3.89893	9.66175e-05	0.00113226
Smpx	9.47262	5.66555	3.09848	8.45618	17.1055	29.8736	18.7482	25.8031	6.67321	22.8826	0.291628	14.6554	1.77077	0.455467	3.88782	0.00010115	0.0011821
Chga	0	1.13311	0	0	0	0	1059.27	728.017	0.283277	446.823	0.000633981	112.052	10.6707	2.74782	3.88334	0.000103033	0.00120078
Fbxo17	28.4179	20.396	18.5909	22.1975	57.9687	50.0821	34.6842	41.4693	22.4005	46.0511	0.486428	31.3339	1.03323	0.266121	3.88256	0.000103364	0.00120397
Tmem200a	12.3144	10.198	10.3283	12.6843	18.0558	14.9368	67.4936	64.5078	11.3812	41.2485	0.275919	21.3051	1.85485	0.478003	3.8804	0.000104283	0.00121334
Kcnh4	71.0447	179.031	78.4947	126.843	28.5092	26.359	60.9317	22.117	113.853	34.4792	3.30209	69.2972	-1.72267	0.444047	-3.87948	0.000104678	0.00121727
Lhx6	19.8925	18.1298	13.4267	19.0264	35.1613	35.1454	37.4965	38.7047	17.6188	36.627	0.481035	27.8629	1.05396	0.272993	3.86076	0.000113035	0.00130083
Doc2g	43.5741	72.519	91.9214	123.672	32.3104	17.5727	39.3713	31.3324	82.9215	30.1467	2.7506	61.7006	-1.46042	0.379299	-3.85031	0.000117969	0.00135098
Zdbf2	11.3671	11.3311	5.16413	7.39916	21.857	16.694	26.2475	40.5478	8.81538	26.3366	0.33472	15.6291	1.57716	0.410386	3.84311	0.000121486	0.00138599
Lipc	5.68357	2.26622	2.06565	1.05702	14.2546	14.9368	12.1863	16.5877	2.76812	14.4914	0.191018	8.67826	2.35714	0.613608	3.84145	0.000122311	0.0013939
Gch1	34.1014	37.3926	27.8863	27.4826	39.9129	43.0531	95.616	110.585	31.7157	72.2917	0.438719	48.7964	1.18889	0.310067	3.83429	0.000125926	0.00142356
Aldh1a3	181.874	218.69	187.974	173.352	449.495	876.877	254.976	210.111	190.473	447.865	0.425291	414.149	1.23418	0.322678	3.82479	0.000130882	0.00147092
Nat8l	42.6268	53.2561	70.2321	31.7107	70.3227	162.547	164.984	72.8017	49.4564	117.664	0.420319	76.5387	1.25185	0.328024	3.81635	0.000135441	0.00151812
Gm14321	65.3611	88.3825	101.217	94.075	52.2668	25.4804	46.8706	35.0185	87.2589	39.9091	2.18644	62.5783	-1.13002	0.296311	-3.81363	0.000136938	0.00153246
Gm42267	14.2089	23.7953	14.4596	11.6273	4.75153	4.39317	2.81223	1.84308	16.0228	3.45	4.64427	8.66425	-2.20927	0.582277	-3.79419	0.000148126	0.00164891
Tmem179	7.5781	5.66555	15.4924	7.39916	15.2049	34.2667	48.7454	30.4108	9.0338	32.157	0.280928	17.1955	1.82844	0.482658	3.78828	0.000151692	0.00168328
Gm36011	111.777	196.028	81.5932	123.672	49.4159	51.8394	63.744	71.8801	128.267	59.2199	2.16595	84.4839	-1.11292	0.295293	-3.76887	0.000163986	0.00180642
Gm12927	7.5781	14.7304	9.29543	9.51321	38.9626	21.9659	29.9972	22.117	10.2793	28.2606	0.363732	19.5562	1.46905	0.390446	3.76249	0.000168229	0.0018464
Gm36674	15.1562	13.5973	5.16413	15.8553	38.0122	24.6018	29.9972	35.9401	12.4432	32.1378	0.387184	21.5871	1.3665	0.363488	3.75942	0.00017031	0.00186574
Mmd2	32.2069	23.7953	28.9191	40.1669	36.1116	53.5967	85.3044	133.623	31.272	77.159	0.405293	41.8606	1.30122	0.346442	3.75596	0.000172677	0.0018864
Rab3c	1.89452	4.53244	6.19695	4.22809	1.90061	1.75727	61.8691	107.82	4.213	43.3368	0.0972153	14.1672	3.36778	0.903561	3.72723	0.000193596	0.00208898
Gm13398	8.52536	1.13311	3.09848	4.22809	22.8073	13.1795	16.8734	11.98	4.24626	16.2101	0.261952	12.4646	1.89071	0.507847	3.72299	0.000196877	0.00211897
Sorcs1	25.5761	20.396	36.1489	13.7413	6.65214	6.15044	12.1863	10.1369	23.9656	8.78147	2.72911	17.6133	-1.45528	0.391279	-3.71929	0.000199786	0.00214699
Gucy2g	18.9452	23.7953	24.7878	16.9124	57.9687	60.6258	47.808	25.8031	21.1102	48.0514	0.439325	36.4538	1.18964	0.320762	3.7088	0.00020824	0.00222537
Caln1	0.947262	0	1.03283	0	1.90061	0.878634	74.0555	82.9386	0.495022	39.9433	0.0123931	10.6086	6.27683	1.69331	3.70685	0.000209855	0.0022381
Gm41750	3.78905	6.79866	16.5252	14.7983	1.90061	0	1.87482	0	10.4778	0.943859	11.101	4.69775	-3.4965	0.948231	-3.68739	0.000226564	0.00238735
Gm40478	5.68357	7.93177	5.16413	9.51321	19.0061	15.8154	27.1849	17.5093	7.07317	19.8789	0.355812	13.3632	1.49783	0.406274	3.68676	0.00022713	0.00238854
Ankfn1	4.73631	4.53244	3.09848	8.45618	21.857	20.2086	15.936	13.8231	5.20585	17.9562	0.28992	11.6667	1.78894	0.485977	3.68112	0.000232214	0.00243715
LOC108168893	1.89452	2.26622	0	0	17.1055	12.3009	10.3115	9.2154	1.04019	12.2333	0.0850288	6.21496	3.55834	0.9667	3.68091	0.000232403	0.00243792
Gm42002	17.998	27.1946	22.7222	33.8247	42.7638	74.6839	45.9332	44.2339	25.4349	51.9037	0.49004	37.7713	1.03832	0.283508	3.66242	0.000249846	0.00260499
Gm40278	4.73631	10.198	4.1313	4.22809	17.1055	14.0581	20.623	23.0385	5.82342	18.7063	0.311308	10.4213	1.70109	0.465706	3.65272	0.00025948	0.00269644
Vat1l	11.3671	4.53244	5.16413	2.11405	13.3043	12.3009	36.559	29.4893	5.79444	22.9134	0.252885	11.2254	1.96052	0.53742	3.64802	0.000264274	0.00273419
Rbp4	42.6268	50.9899	54.7397	49.6801	81.7263	116.858	143.424	114.271	49.5091	114.07	0.434025	75.7656	1.2053	0.331324	3.63784	0.000274935	0.00282924
Pak3	25.5761	11.3311	21.6893	12.6843	35.1613	26.359	56.2447	60.8217	17.8202	44.6467	0.399138	26.4565	1.31258	0.361159	3.63436	0.000278676	0.00286076
Bcat1	3872.41	3553.43	3468.23	3375.07	1358.94	1688.73	1211.14	1063.46	3567.29	1330.57	2.68103	2497.82	-1.42277	0.391509	-3.63407	0.000278987	0.00286257
Cpb1	0.947262	1882.09	82.626	3.17107	0	0.878634	5.62447	9.2154	492.21	3.92963	125.256	124.634	-6.96894	1.91817	-3.63311	0.000280022	0.0028704
Oip5	41.6795	22.6622	35.1161	34.8818	13.3043	15.8154	8.4367	20.2739	33.5849	14.4576	2.323	21.0796	-1.21944	0.336567	-3.62316	0.000291027	0.00297022
Bex1	17.0507	20.396	32.0176	33.8247	62.7202	55.3539	54.3699	42.3908	25.8223	53.7087	0.480783	43.8621	1.0588	0.292256	3.62286	0.000291369	0.00297227
Gm39191	19.8925	14.7304	32.0176	17.9694	5.70184	9.66497	5.62447	9.2154	21.1525	7.55167	2.80103	12.9901	-1.48414	0.411218	-3.60914	0.000307209	0.00311729
Acsbg1	17.0507	28.3277	26.8535	20.0834	31.3601	17.5727	122.801	129.016	23.0788	75.1873	0.306951	38.7314	1.70614	0.472757	3.60891	0.000307489	0.00311862
Ccdc182	0.947262	1.13311	1.03283	2.11405	20.9067	8.78634	4.68706	8.29386	1.30681	10.6685	0.122492	9.45091	3.03392	0.843324	3.59758	0.000321193	0.00323739
Gm36470	35.0487	44.1913	29.9519	24.3115	10.4534	21.0872	10.3115	8.29386	33.3759	12.5365	2.6623	23.1915	-1.40449	0.390544	-3.59624	0.000322848	0.00325252
Alk	32.2069	40.7919	35.1161	34.8818	21.857	14.9368	21.5605	7.37232	35.7492	16.4317	2.17563	24.3433	-1.12241	0.312843	-3.58779	0.000333497	0.00335021
Gm34376	33.1542	41.925	40.2802	31.7107	9.50306	22.8445	18.7482	18.4308	36.7675	17.3816	2.11531	24.8232	-1.07299	0.299169	-3.58656	0.000335074	0.00336125
Ros1	25.5761	14.7304	27.8863	15.8553	50.3662	71.1694	31.872	34.097	21.012	46.8761	0.448246	36.2256	1.15186	0.321969	3.57755	0.000346824	0.00345449
Lrg1	24.6288	60.0548	50.6084	54.9652	25.6583	21.0872	27.1849	16.5877	47.5643	22.6295	2.10187	36.05	-1.06613	0.298388	-3.57296	0.000352967	0.0035041
LOC108167666	38.8378	20.396	29.9519	22.1975	10.4534	8.78634	9.37411	16.5877	27.8458	11.3004	2.46414	20.6691	-1.31006	0.366689	-3.57267	0.000353363	0.00350638
Rad51ap2	1.89452	3.39933	4.1313	5.28511	14.2546	18.4513	12.1863	16.5877	3.67757	15.37	0.239269	8.98968	2.07561	0.581827	3.5674	0.000360537	0.00356918
Epb42	40.7323	36.2595	40.2802	28.5396	16.1552	13.1795	14.9986	19.3523	36.4529	15.9214	2.28955	29.0924	-1.19806	0.336034	-3.5653	0.000363444	0.00358954
A330040F15Rik	59.6775	200.56	143.563	173.352	57.9687	65.0189	85.3044	39.6262	144.288	61.9796	2.32799	111.715	-1.21702	0.342478	-3.55357	0.000380042	0.00372385
Il17f	8.52536	3.39933	5.16413	7.39916	17.1055	14.0581	23.4353	26.7247	6.12199	20.3309	0.301118	13.5198	1.71551	0.482921	3.55236	0.000381794	0.00373912
Gm32543	3.78905	5.66555	4.1313	7.39916	21.857	21.0872	18.7482	12.9016	5.24626	18.6485	0.281323	9.33396	1.83867	0.518143	3.54858	0.000387311	0.00377776
Fam205a1	8.52536	9.06488	8.2626	12.6843	38.0122	30.7522	14.9986	23.96	9.63428	26.9308	0.357742	15.9621	1.48539	0.419369	3.54198	0.000397136	0.00386622
Cemip	13.2617	18.1298	19.6237	15.8553	35.1613	33.3881	36.559	29.4893	16.7176	33.6494	0.496817	26.3239	1.01447	0.286464	3.54136	0.000398072	0.00387354
Gm32767	13.2617	9.06488	8.2626	10.5702	1.90061	2.6359	1.87482	1.84308	10.2898	2.0636	4.98635	6.06831	-2.31849	0.658281	-3.52204	0.000428246	0.00412343
Gm30589	30.3124	19.2629	23.755	27.4826	9.50306	6.15044	11.2489	13.8231	25.2032	10.1814	2.47542	16.761	-1.31652	0.374624	-3.51425	0.000441003	0.00422698
Gm30729	4.73631	3.39933	2.06565	7.39916	16.1552	16.694	15.936	11.98	4.40011	15.1913	0.289647	8.51348	1.78493	0.508067	3.51317	0.000442791	0.00424027
Lonrf2	24.6288	9.06488	20.6565	13.7413	33.2607	24.6018	43.1209	55.2924	17.0229	39.069	0.435714	26.9107	1.18248	0.337069	3.50813	0.000451272	0.00431366
Mgst2	3.78905	2.26622	1.03283	0	5.70184	7.90771	11.2489	24.8816	1.77202	12.435	0.142503	6.48302	2.78756	0.795262	3.50521	0.000456255	0.00435931
LOC108167993	13.2617	26.0615	17.558	20.0834	7.60245	3.51454	3.74965	1.84308	19.2412	4.17743	4.60598	12.1031	-2.20485	0.629334	-3.50347	0.000459243	0.00438191
Acss2os	18.9452	31.7271	35.1161	33.8247	10.4534	7.90771	18.7482	11.98	29.9033	12.2723	2.43664	23.8024	-1.28418	0.366847	-3.50058	0.000464239	0.00442158
Gm39908	58.7303	72.519	48.5428	47.566	12.354	9.66497	22.4979	37.7831	56.8395	20.575	2.76255	36.7811	-1.46642	0.420675	-3.48588	0.000490525	0.00462669
Syt2	4.73631	6.79866	7.22978	0	14.2546	8.78634	23.4353	24.8816	4.69119	17.8395	0.262967	11.58	1.92866	0.554263	3.47968	0.000502017	0.00471963
LOC102639543	20.8398	24.9284	15.4924	26.4256	76.0245	43.0531	36.559	32.2539	21.9215	46.9726	0.466687	29.9092	1.1012	0.317136	3.47233	0.000515963	0.00483352
St8sia2	3.78905	5.66555	3.09848	1.05702	15.2049	7.02907	11.2489	23.0385	3.40252	14.1304	0.240795	8.33785	2.0601	0.59428	3.46655	0.000527179	0.00492547
Gm38939	26.5233	18.1298	26.8535	26.4256	6.65214	8.78634	15.936	11.0585	24.483	10.6082	2.30793	16.5501	-1.21251	0.349946	-3.46486	0.000530507	0.00494999
Gm33945	5.68357	3.39933	2.06565	6.34214	21.857	2.6359	25.3101	20.2739	4.37267	17.5192	0.249593	11.7015	1.99019	0.575584	3.45769	0.00054483	0.00505681
LOC105244124	19.8925	19.2629	12.3939	25.3686	5.70184	6.15044	7.49929	2.76462	19.2295	5.52905	3.4779	11.1882	-1.79809	0.521727	-3.44642	0.000568076	0.00523344
Fhitos	6.63084	28.3277	24.7878	17.9694	5.70184	4.39317	5.62447	5.52924	19.4289	5.31218	3.65743	12.0007	-1.86444	0.542052	-3.43959	0.000582597	0.00535553
B4galnt4	14.2089	14.7304	26.8535	40.1669	7.60245	8.78634	5.62447	11.98	23.9899	8.49832	2.8229	13.8948	-1.49378	0.434313	-3.43941	0.000582977	0.00535669
Topaz1	12.3144	9.06488	12.3939	12.6843	3.80122	1.75727	1.87482	4.6077	11.6144	3.01025	3.85827	6.5173	-1.95735	0.570848	-3.42885	0.000606142	0.0055454
Dpp6	17.998	18.1298	40.2802	21.1405	54.1675	37.7813	60.9317	42.3908	24.3871	48.8178	0.499553	30.5083	0.998779	0.291537	3.4259	0.000612755	0.00560105
Lag3	7.5781	13.5973	13.4267	5.28511	39.9129	21.9659	26.2475	14.7446	9.97181	25.7177	0.387741	15.9196	1.37294	0.401622	3.41847	0.000629737	0.00572158
Ifi44l	1.89452	2.26622	5.16413	2.11405	10.4534	14.0581	9.37411	12.9016	2.85973	11.6968	0.244488	8.91218	2.03585	0.595868	3.41661	0.00063405	0.00575581
Gm32878	11.3671	14.7304	19.6237	6.34214	2.85092	0.878634	6.56188	0.92154	13.0158	2.80324	4.64314	7.18297	-2.2266	0.652331	-3.4133	0.000641821	0.00581136
Cox8b	53.994	35.1264	77.4619	33.8247	95.0306	192.421	151.861	96.7617	50.1017	134.018	0.373842	97.9072	1.41808	0.415579	3.4123	0.000644162	0.0058246
Gm35338	54.9412	79.3177	75.3962	67.6495	46.565	13.1795	37.4965	36.8616	69.3261	33.5256	2.06785	54.4429	-1.05054	0.30912	-3.39847	0.000677644	0.00609389
LOC105246106	24.6288	19.2629	20.6565	22.1975	6.65214	5.2718	10.3115	13.8231	21.6864	9.01464	2.40569	16.8291	-1.27316	0.374875	-3.39623	0.000683207	0.00613607
Gm36738	16.1035	14.7304	14.4596	22.1975	38.0122	44.8103	29.0597	31.3324	16.8727	35.8037	0.471257	26.6723	1.08684	0.320209	3.39417	0.000688369	0.00617718
Gm9949	12.3144	20.396	28.9191	28.5396	6.65214	9.66497	7.49929	11.0585	22.5423	8.71872	2.5855	16.5976	-1.36259	0.40154	-3.3934	0.000690307	0.00619194
Gsdmc3	41.6795	26.0615	26.8535	38.0528	53.2171	109.829	59.0569	58.057	33.1618	70.0401	0.473469	55.1689	1.07655	0.317349	3.39232	0.000693045	0.00621221
Rxrg	15.1562	11.3311	13.4267	9.51321	24.708	33.3881	38.4339	20.2739	12.3568	29.201	0.423165	23.1172	1.235	0.36501	3.38348	0.00071574	0.00638479
Gm36089	11.3671	21.5291	10.3283	13.7413	27.5589	28.1163	38.4339	35.0185	14.2414	32.2819	0.441159	21.7514	1.19214	0.352483	3.38212	0.000719275	0.0064055
Pcsk9	134.511	149.57	142.53	147.983	174.856	174.848	419.96	452.476	143.649	305.535	0.470154	219.437	1.0889	0.322526	3.37617	0.000735025	0.00651825
Gm41035	17.998	22.6622	41.313	16.9124	8.55276	12.3009	6.56188	6.45078	24.7214	8.46657	2.91988	13.5616	-1.54101	0.45665	-3.37459	0.000739246	0.00654743
Gm41813	22.7343	26.0615	14.4596	19.0264	41.8135	43.9317	49.6828	61.7432	20.5704	49.2928	0.417311	35.4511	1.26251	0.374734	3.36909	0.000754163	0.00665442
Sycn	9.47262	392.056	40.2802	29.5966	18.0558	14.0581	20.623	14.7446	117.851	16.8704	6.98568	46.0619	-2.80339	0.832163	-3.3688	0.000754948	0.00665856
Etv4	15.1562	14.7304	14.4596	26.4256	29.4595	33.3881	50.6202	36.8616	17.6929	37.5824	0.470778	27.0976	1.0879	0.324396	3.3536	0.000797667	0.00699732
Hoxa1	21.787	15.8635	11.3611	14.7983	36.1116	43.9317	37.4965	19.3523	15.9525	34.223	0.466133	28.2139	1.09586	0.327461	3.34654	0.000818273	0.00715429
Vaultrc5	14.2089	16.9966	22.7222	17.9694	37.0619	51.8394	42.1835	25.8031	17.9743	39.222	0.45827	27.4683	1.1293	0.33754	3.34568	0.000820825	0.0071677
Hsd3b6	0	0	1.03283	0	0.950306	0.878634	31.872	11.98	0.258206	11.4202	0.0226095	3.10846	5.17671	1.55161	3.33635	0.000848871	0.00737295
Serpinc1	41.6795	83.8501	60.9367	60.2503	47.5153	24.6018	27.1849	23.0385	61.6792	30.5851	2.01664	47.3007	-1.01021	0.302837	-3.33581	0.000850523	0.00738426
Vnn3	14.2089	2.26622	18.5909	6.34214	17.1055	24.6018	68.431	81.0955	10.352	47.8085	0.216531	17.4996	2.1982	0.659304	3.33413	0.000855677	0.00741985
Oas1g	5.68357	9.06488	9.29543	13.7413	38.0122	26.359	17.8108	15.6662	9.44629	24.4621	0.386161	13.4046	1.38003	0.413929	3.33399	0.000856109	0.00742055
Gm35724	2.84179	10.198	5.16413	8.45618	16.1552	20.2086	21.5605	12.9016	6.66502	17.7065	0.376418	12.6139	1.43649	0.432494	3.32142	0.000895609	0.00770716
Gm29681	6.63084	6.79866	4.1313	4.22809	18.0558	11.4222	19.6856	17.5093	5.44722	16.6682	0.326802	10.9899	1.61056	0.485231	3.31916	0.000902895	0.00776549
LOC108167420	15.1562	52.123	32.0176	15.8553	76.9748	53.5967	64.6814	43.3124	28.788	59.6413	0.482686	43.4237	1.06257	0.322308	3.29676	0.000978061	0.00832713
Gm39084	2.84179	5.66555	1.03283	3.17107	10.4534	14.9368	11.2489	9.2154	3.17781	11.4636	0.277208	7.1371	1.87587	0.569054	3.29647	0.00097907	0.008329
Ahrr	33.1542	10.198	22.7222	19.0264	32.3104	68.5335	37.4965	46.077	21.2752	46.1043	0.461457	29.9605	1.10444	0.336223	3.28484	0.0010204	0.00862152
4931403E22Rik	56.8357	58.9217	30.9848	49.6801	18.0558	11.4222	29.0597	26.7247	49.1056	21.3156	2.30374	36.2749	-1.20618	0.367856	-3.27895	0.00104196	0.00875459
Agtr2	4.73631	0	1.03283	3.17107	3.80122	6.15044	24.3727	34.097	2.23505	17.1053	0.130664	5.80341	2.90507	0.88656	3.27679	0.00104994	0.00881118
Gm41031	0.947262	3.39933	2.06565	2.11405	7.60245	6.15044	14.0612	13.8231	2.13157	10.4093	0.204776	6.16402	2.31312	0.707478	3.26954	0.00107724	0.00900062
Gm11844	17.998	6.79866	13.4267	10.5702	35.1613	33.3881	24.3727	21.1954	12.1984	28.5294	0.427573	19.3918	1.20987	0.371404	3.25757	0.00112372	0.00930454
Cnr1	13.2617	4.53244	21.6893	7.39916	18.0558	21.0872	50.6202	70.0371	11.7206	39.9501	0.293382	17.1692	1.761	0.541692	3.25093	0.00115029	0.00948727
Ism1	16.1035	12.4642	23.755	16.9124	21.857	37.7813	37.4965	41.4693	17.3088	34.651	0.499516	25.7242	0.999166	0.307346	3.25095	0.00115022	0.00948727
Snora74a	2055.56	845.3	1381.92	1825.48	4425.58	4550.45	2944.41	3264.1	1527.06	3796.13	0.402269	2461.58	1.31367	0.404982	3.24377	0.00117957	0.00970227
Fam150b	5.68357	0	4.1313	5.28511	10.4534	13.1795	13.1238	15.6662	3.775	13.1057	0.288042	8.9235	1.76498	0.545317	3.2366	0.00120961	0.00991074
Gm39813	36.9432	20.396	13.4267	25.3686	6.65214	11.4222	11.2489	6.45078	24.0336	8.94353	2.68726	15.338	-1.42903	0.442391	-3.23025	0.00123684	0.0101024
Npas2	128.828	135.973	118.775	91.961	32.3104	50.0821	91.8663	44.2339	118.884	54.6232	2.17644	74.0092	-1.12207	0.3476	-3.22806	0.00124633	0.0101721
H2-Q2	36.9432	19.2629	25.8206	21.1405	89.3288	52.718	39.3713	38.7047	25.7918	55.0307	0.46868	38.8724	1.08455	0.336379	3.22418	0.00126334	0.0102929
Gm36183	29.3651	28.3277	15.4924	19.0264	75.0742	74.6839	29.9972	27.6462	23.0529	51.8504	0.444605	39.6287	1.16953	0.362813	3.22349	0.00126639	0.0103039
Pabpc4l	11.3671	9.06488	6.19695	15.8553	35.1613	13.1795	26.2475	35.9401	10.6211	27.6321	0.384375	17.8669	1.37531	0.427655	3.21593	0.0013002	0.0105182
Gm36440	3.78905	3.39933	7.22978	4.22809	9.50306	13.1795	12.1863	22.117	4.66156	14.2465	0.327208	9.1774	1.61045	0.501239	3.21293	0.0013139	0.0106047
Prkag3	124.091	237.953	218.959	238.887	71.273	60.6258	134.05	129.937	204.973	98.9714	2.07103	179.921	-1.0499	0.327469	-3.2061	0.00134547	0.0108346
Fam166a	25.5761	24.9284	36.1489	20.0834	13.3043	8.78634	14.0612	9.2154	26.6842	11.3418	2.35273	15.59	-1.23889	0.386709	-3.20369	0.0013568	0.0109134
Gm30319	18.9452	20.396	16.5252	21.1405	3.80122	12.3009	8.4367	5.52924	19.2517	7.51701	2.56109	15.3219	-1.34607	0.420285	-3.20276	0.00136117	0.0109371
Naip1	11.3671	20.396	12.3939	13.7413	29.4595	32.5095	25.3101	29.4893	14.4746	29.1921	0.495839	18.1498	1.02518	0.321899	3.18477	0.00144869	0.011491
Snap25	0	0	1.03283	0	0	0	23.4353	25.8031	0.258206	12.3096	0.020976	4.1192	5.28538	1.66509	3.17422	0.00150237	0.011845
Pcdhb21	10.4199	6.79866	5.16413	7.39916	20.9067	19.3299	18.7482	22.117	7.44546	20.2755	0.367215	14.7322	1.43631	0.452827	3.17187	0.00151462	0.0119282
Gm41932	12.3144	6.79866	15.4924	10.5702	0.950306	2.6359	1.87482	4.6077	11.2939	2.51718	4.48673	8.07975	-2.16484	0.683312	-3.16816	0.00153409	0.0120187
Akr1cl	0	0	1.03283	0	0.950306	0	1140.83	1606.24	0.258206	687.006	0.000375843	171.877	11.3744	3.59472	3.1642	0.00155508	0.0121673
Gm40615	0.947262	4.53244	3.09848	4.22809	11.4037	15.8154	5.62447	14.7446	3.20157	11.897	0.269106	7.34548	1.92363	0.609226	3.1575	0.0015913	0.0124025
Fmr1nb	6.63084	1.13311	25.8206	7.39916	0	0	0	2.76462	10.2459	0.691155	14.8244	3.73551	-3.89264	1.23472	-3.15265	0.00161793	0.0125503
Slc6a2	4.73631	3.39933	0	2.11405	2.85092	7.02907	44.9957	23.0385	2.56242	19.4786	0.131551	8.5841	2.91903	0.933464	3.1271	0.00176541	0.013515
Gm31527	51.1522	49.8568	22.7222	28.5396	7.60245	9.66497	29.0597	9.2154	38.0677	13.8856	2.74151	24.5871	-1.45723	0.467053	-3.12005	0.00180823	0.013759
Gm42114	18.9452	16.9966	22.7222	23.2545	9.50306	9.66497	8.4367	8.29386	20.4796	8.97465	2.28194	13.247	-1.19061	0.383111	-3.10775	0.00188519	0.0142204
Pkp1	3.78905	7.93177	2.06565	4.22809	12.354	14.0581	15.936	11.0585	4.50364	13.3516	0.33731	9.48758	1.58895	0.511628	3.10567	0.00189849	0.0143003
Mbl2	18.9452	15.8635	14.4596	7.39916	49.4159	22.8445	43.1209	21.1954	14.1669	34.1442	0.414913	19.398	1.26251	0.406546	3.10544	0.00189993	0.0143061
Slc22a14	8.52536	11.3311	11.3611	10.5702	33.2607	21.0872	20.623	19.3523	10.4469	23.5808	0.443027	17.5834	1.17765	0.379941	3.09957	0.00193802	0.0145565
Htr3a	22.7343	15.8635	16.5252	16.9124	30.4098	42.1744	50.6202	34.097	18.0088	39.3254	0.457945	28.1445	1.12216	0.364364	3.07978	0.00207155	0.0154169
Best1	53.994	39.6588	43.3787	38.0528	13.3043	21.9659	17.8108	32.2539	43.7711	21.3337	2.05173	29.5729	-1.03748	0.337359	-3.07531	0.00210283	0.0156111
Gm14762	18.9452	13.5973	19.6237	24.3115	28.5092	24.6018	66.5562	57.1355	19.1194	44.2007	0.43256	29.7057	1.2056	0.393378	3.06474	0.00217857	0.0160604
Chrna2	17.0507	21.5291	21.6893	20.0834	9.50306	4.39317	15.936	5.52924	20.0881	8.84037	2.27232	15.0804	-1.18993	0.388344	-3.06411	0.0021832	0.0160833
2310040G24Rik	13.2617	9.06488	21.6893	11.6273	33.2607	24.6018	33.7468	23.0385	13.9108	28.6619	0.48534	20.9801	1.03448	0.337774	3.06265	0.00219387	0.0161506
Oas2	42.6268	55.5224	29.9519	29.5966	132.093	75.5625	54.3699	54.3709	39.4244	79.099	0.498419	55.9378	1.00603	0.328693	3.06071	0.00220813	0.0162273
Gm31183	11.3671	4.53244	6.19695	10.5702	11.4037	20.2086	27.1849	23.96	8.16669	20.6893	0.39473	15.6569	1.32797	0.434074	3.05933	0.00221836	0.0162968
4930432K21Rik	13.2617	13.5973	18.5909	15.8553	55.1178	48.3249	16.8734	20.2739	15.3263	35.1475	0.436057	25.8194	1.19833	0.393409	3.04602	0.00231891	0.0169396
Rsph4a	22.7343	23.7953	38.2145	17.9694	12.354	13.1795	13.1238	11.98	25.6784	12.6593	2.02842	18.8957	-1.02054	0.335476	-3.04206	0.00234964	0.0170828
4933439K11Rik	3.78905	3.39933	2.06565	1.05702	7.60245	13.1795	10.3115	9.2154	2.57776	10.0772	0.255801	5.16662	1.96303	0.646806	3.03496	0.00240568	0.0174004
Adamdec1	4.73631	3.39933	2.06565	3.17107	19.0061	12.3009	4.68706	11.0585	3.34309	11.7631	0.284201	6.68709	1.80533	0.595015	3.0341	0.00241256	0.0174442
Rgs7	20.8398	20.396	13.4267	12.6843	29.4595	30.7522	36.559	42.3908	16.8367	34.7904	0.483946	22.8494	1.04582	0.345087	3.03059	0.00244077	0.017576
Mpz	6.63084	4.53244	0	4.22809	8.55276	16.694	21.5605	8.29386	3.84784	13.7753	0.279329	7.4909	1.83162	0.604442	3.03027	0.00244333	0.0175883
A530016L24Rik	38.8378	46.4575	59.9039	33.8247	48.4656	101.922	137.799	114.271	44.756	100.614	0.444827	64.0956	1.16944	0.386972	3.02201	0.00251099	0.0180201
Gm2814	9.47262	10.198	8.2626	8.45618	28.5092	21.0872	17.8108	18.4308	9.09735	21.4595	0.423931	14.5057	1.23834	0.410476	3.01685	0.00255415	0.0182491
Gm17597	37.8905	26.0615	41.313	50.7371	15.2049	7.90771	18.7482	29.4893	39.0005	17.8375	2.18643	25.7224	-1.13314	0.376266	-3.01155	0.0025992	0.0185333
Gm35887	11.3671	9.06488	14.4596	6.34214	4.75153	2.6359	1.87482	2.76462	10.3084	3.00672	3.42846	6.28591	-1.78635	0.593973	-3.00745	0.00263446	0.0187278
Cacna2d2	10.4199	7.93177	6.19695	4.22809	16.1552	14.9368	23.4353	19.3523	7.19417	18.4699	0.389508	10.6261	1.35069	0.45012	3.00073	0.0026933	0.0190667
Gm10790	9.47262	16.9966	3.09848	9.51321	26.6086	23.7231	24.3727	17.5093	9.77024	23.0534	0.423809	15.028	1.25167	0.417297	2.99947	0.00270452	0.0191164
4933427E11Rik	4.73631	3.39933	6.19695	12.6843	21.857	34.2667	9.37411	12.9016	6.75422	19.5999	0.344605	13.3069	1.54039	0.516742	2.98095	0.00287352	0.0201289
Gm32540	1.89452	3.39933	4.1313	5.28511	16.1552	7.02907	9.37411	15.6662	3.67757	12.0561	0.305037	8.18568	1.7207	0.57744	2.97987	0.0028837	0.0201869
Gm6654	31.2597	39.6588	12.3939	24.3115	10.4534	10.5436	9.37411	14.7446	26.906	11.2789	2.38551	18.1094	-1.25126	0.420247	-2.97744	0.0029067	0.0203074
Syt4	1.89452	1.13311	1.03283	0	1.90061	1.75727	31.872	29.4893	1.01511	16.2548	0.0624502	5.56642	3.98628	1.34	2.97484	0.00293142	0.0204463
Gm41668	118.408	192.629	176.613	226.203	87.4282	50.9608	96.5534	121.643	178.463	89.1464	2.00191	121.415	-1.00126	0.336785	-2.97298	0.00294921	0.0205297
Reg1	0	359.196	16.5252	1.05702	0	1.75727	0	0	94.1945	0.439317	214.411	24.0436	-7.69936	2.59016	-2.97254	0.00295343	0.0205455
2024-09-03	14.2089	12.4642	11.3611	8.45618	38.0122	16.694	24.3727	25.8031	11.6226	26.2205	0.443263	15.8645	1.16725	0.394901	2.95579	0.00311866	0.0215035
Gm32245	28.4179	30.594	34.0832	25.3686	12.354	20.2086	12.1863	6.45078	29.6159	12.7999	2.31376	23.9582	-1.2057	0.408505	-2.9515	0.00316237	0.021734
Sobp	8.52536	15.8635	9.29543	12.6843	32.3104	24.6018	19.6856	22.117	11.5921	24.6787	0.469723	17.4168	1.10141	0.373459	2.9492	0.00318596	0.021825
Nr4a2	26.5233	22.6622	15.4924	13.7413	30.4098	22.8445	41.2461	79.2525	19.6048	43.4382	0.451326	25.6848	1.14439	0.388226	2.94775	0.00320093	0.0219134
1500015O10Rik	18.9452	19.2629	22.7222	32.7677	26.6086	17.5727	104.99	86.6248	23.4245	58.949	0.397369	32.1573	1.33119	0.452942	2.93899	0.00329287	0.0223974
Vmn1r20	22.7343	46.4575	14.4596	14.7983	8.55276	9.66497	3.74965	7.37232	24.6124	7.33492	3.35551	19.0288	-1.74011	0.592075	-2.93901	0.00329265	0.0223974
Nefl	7.5781	7.93177	10.3283	12.6843	15.2049	23.7231	22.4979	22.117	9.6306	20.8857	0.461109	18.4855	1.12103	0.381768	2.93642	0.00332023	0.0225618
Rian	32.2069	24.9284	24.7878	30.6537	24.708	23.7231	155.61	243.287	28.1442	111.832	0.251665	46.2302	1.98968	0.678082	2.93428	0.00334323	0.0227034
Gm35055	13.2617	7.93177	12.3939	23.2545	5.70184	5.2718	0.937411	4.6077	14.2105	4.12969	3.44105	8.18822	-1.78211	0.607504	-2.93349	0.00335172	0.0227464
Tmem28	21.787	41.925	35.1161	26.4256	6.65214	11.4222	24.3727	11.98	31.3134	13.6068	2.30131	27.759	-1.19865	0.408672	-2.93305	0.00335651	0.0227612
C4a	49.2576	79.3177	39.2474	75.0486	2.85092	11.4222	43.1209	33.1754	60.7178	22.6424	2.6816	44.2781	-1.42236	0.486082	-2.92617	0.00343163	0.0231918
Slc24a2	0	0	0	0	0.950306	0	33.7468	35.9401	0	17.6593	0	4.86929	6.52769	2.2365	2.91871	0.00351483	0.0236697
1700125H03Rik	7.5781	21.5291	15.4924	8.45618	3.80122	5.2718	0.937411	6.45078	13.2639	4.11531	3.22307	9.42332	-1.67229	0.573206	-2.91744	0.00352919	0.023731
Ivl	10.4199	7.93177	6.19695	8.45618	18.0558	19.3299	20.623	14.7446	8.2512	18.1884	0.453652	13.7003	1.13406	0.389285	2.91319	0.00357761	0.0239635
Dlgap1	15.1562	40.7919	33.0504	32.7677	39.9129	43.9317	86.2418	74.6448	30.4416	61.1828	0.497551	39.1595	1.0141	0.348621	2.90889	0.00362714	0.0242491
Krt14	1.89452	3.39933	7.22978	4.22809	15.2049	13.1795	17.8108	4.6077	4.18793	12.7007	0.329739	10.9085	1.60651	0.552448	2.90798	0.00363771	0.0242967
Capsl	6.63084	7.93177	10.3283	4.22809	20.9067	18.4513	12.1863	15.6662	7.27974	16.8026	0.433249	12.484	1.20858	0.415878	2.9061	0.00365966	0.0244022
4930589L23Rik	14.2089	15.8635	21.6893	12.6843	5.70184	6.15044	4.68706	8.29386	16.1115	6.2083	2.59516	8.80328	-1.37403	0.473345	-2.90281	0.00369833	0.0246297
Klb	33.1542	11.3311	19.6237	15.8553	23.7577	57.9898	52.495	58.9786	19.9911	48.3053	0.413849	28.381	1.26435	0.436193	2.8986	0.00374829	0.0248708
Nrn1	2.84179	4.53244	4.1313	5.28511	17.1055	10.5436	11.2489	11.0585	4.19766	12.4891	0.336105	6.31486	1.58078	0.545362	2.89859	0.00374841	0.0248708
Acot10	20.8398	6.79866	13.4267	15.8553	8.55276	2.6359	2.81223	6.45078	14.2301	5.11292	2.78317	9.41935	-1.49538	0.517185	-2.89138	0.00383556	0.0253217
Rnf182	7.5781	9.06488	15.4924	7.39916	24.708	23.7231	25.3101	13.8231	9.88363	21.8911	0.451491	16.2609	1.14831	0.397144	2.89143	0.00383494	0.0253217
Gm33449	2.84179	10.198	2.06565	6.34214	14.2546	18.4513	21.5605	11.98	5.36189	16.5616	0.323754	9.36509	1.65132	0.571739	2.88824	0.00387404	0.0255198
Xcr1	18.9452	16.9966	19.6237	20.0834	69.3724	23.7231	33.7468	32.2539	18.9122	39.774	0.475492	24.4141	1.06855	0.370331	2.8854	0.00390919	0.0257112
Gm32661	6.63084	13.5973	7.22978	5.28511	26.6086	16.694	14.9986	16.5877	8.18576	18.7222	0.437221	13.9244	1.20699	0.418709	2.88266	0.00394338	0.0258716
Scarna10	320.175	86.1163	126.005	215.633	500.811	733.659	296.222	576.884	186.982	526.894	0.354876	343.647	1.49386	0.518481	2.88122	0.00396141	0.0259415
Th	0	0	0	0	0	0	239.04	188.916	0	106.989	0	27.4687	9.12677	3.17169	2.87757	0.00400747	0.0262106
Platr25	6.63084	12.4642	8.2626	5.28511	23.7577	19.3299	20.623	12.9016	8.16069	19.1531	0.426078	12.7265	1.24176	0.43306	2.8674	0.00413859	0.0269954
Gm39729	14.2089	10.198	13.4267	9.51321	27.5589	23.7231	18.7482	39.6262	11.8367	27.4141	0.431774	17.2584	1.20603	0.421367	2.86219	0.00420726	0.0273394
1700003P14Rik	11.3671	22.6622	14.4596	11.6273	5.70184	4.39317	9.37411	5.52924	15.029	6.24959	2.4048	11.784	-1.25994	0.441445	-2.85414	0.00431535	0.0278838
Mgat4c	14.2089	10.198	18.5909	8.45618	21.857	22.8445	21.5605	57.1355	12.8635	30.8494	0.416977	17.7017	1.25715	0.441568	2.84701	0.00441322	0.0283893
Slc36a2	102.304	74.7852	67.1336	53.9082	67.4717	159.033	236.228	156.662	74.5328	154.848	0.481327	97.0509	1.0537	0.370423	2.84459	0.00444685	0.0285621
H19	2.84179	5.66555	4.1313	3.17107	15.2049	5.2718	18.7482	11.98	3.95243	12.8012	0.308753	6.88773	1.70413	0.599428	2.84293	0.00447016	0.0286769
AV039307	23.6816	24.9284	18.5909	28.5396	10.4534	13.1795	14.0612	10.1369	23.9351	11.9577	2.00164	18.5803	-0.99859	0.351955	-2.83727	0.00455017	0.029144
Snord64	17.0507	13.5973	10.3283	11.6273	10.4534	2.6359	3.74965	1.84308	13.1509	4.6705	2.81573	7.1847	-1.50884	0.532695	-2.83246	0.00461912	0.029516
Dio3os	37.8905	26.0615	28.9191	38.0528	19.9564	20.2086	10.3115	14.7446	32.731	16.3053	2.00738	27.4725	-1.00669	0.355444	-2.83222	0.00462263	0.0295294
Gm29883	13.2617	26.0615	12.3939	11.6273	2.85092	7.02907	2.81223	7.37232	15.8361	5.01614	3.15703	10.898	-1.64564	0.582753	-2.82391	0.0047442	0.0301448
Mt3	1.89452	7.93177	12.3939	4.22809	21.857	28.1163	16.8734	9.2154	6.61207	19.0155	0.347719	12.5542	1.53759	0.545012	2.82121	0.00478429	0.03036
Gm40571	29.3651	61.1879	24.7878	26.4256	19.9564	13.1795	14.9986	15.6662	35.4416	15.9502	2.22202	27.9703	-1.148	0.407614	-2.8164	0.00485657	0.0307263
LOC102636563	6.63084	11.3311	9.29543	8.45618	17.1055	23.7231	14.9986	20.2739	8.92838	19.0253	0.469291	15.1512	1.10493	0.393268	2.80961	0.00496015	0.0312691
Hnf1b	1792.22	4845.18	2376.53	2818.02	1557.55	1563.97	1653.59	1004.48	2957.99	1444.9	2.04719	2166.28	-1.03356	0.36842	-2.80538	0.00502568	0.0315784
Cebpd	23.6816	48.7237	29.9519	42.2809	80.776	44.8103	78.7425	90.3109	36.1595	73.66	0.490898	63.0426	1.03062	0.368652	2.79566	0.00517942	0.0323327
Bc1	36.9432	11.3311	19.6237	10.5702	44.6644	43.9317	37.4965	51.6062	19.6171	44.4247	0.44158	35.2668	1.16649	0.417998	2.79066	0.00526005	0.0327489
Angptl8	10.4199	43.0582	28.9191	32.7677	55.1178	68.5335	87.1792	26.7247	28.7912	59.3888	0.484792	48.8946	1.05388	0.377815	2.78941	0.0052804	0.0328562
Stpg3	21.787	16.9966	22.7222	15.8553	3.80122	2.6359	14.9986	7.37232	19.3403	7.20201	2.6854	12.0454	-1.43292	0.514271	-2.78631	0.00533122	0.0331431
Gm39089	3.78905	5.66555	13.4267	21.1405	3.80122	0.878634	1.87482	4.6077	11.0054	2.7906	3.94376	5.9486	-1.98428	0.713915	-2.77943	0.00544544	0.0336648
Snap91	17.0507	20.396	11.3611	16.9124	12.354	22.8445	60.9317	52.5278	16.43	37.1645	0.442089	24.0134	1.1795	0.424742	2.77698	0.00548666	0.0338898
Cabp2	7.5781	14.7304	16.5252	16.9124	2.85092	7.02907	6.56188	4.6077	13.9365	5.26239	2.64832	8.26716	-1.39263	0.503281	-2.7671	0.00565568	0.0347609
Atp2b3	1.89452	0	0	1.05702	0.950306	0	108.74	62.6647	0.737887	43.0887	0.0171248	11.2429	5.84604	2.11529	2.7637	0.00571503	0.0350542
Retn	149.667	82.717	119.808	76.1057	166.304	296.978	471.518	392.576	107.074	331.844	0.322665	177.095	1.63127	0.590397	2.763	0.0057273	0.0351192
Gm38448	3.78905	7.93177	4.1313	2.11405	15.2049	10.5436	18.7482	11.0585	4.49154	13.8888	0.323393	7.82822	1.64113	0.595365	2.75651	0.00584217	0.0357509
Gria2	1.89452	3.39933	1.03283	3.17107	1.90061	3.51454	18.7482	29.4893	2.37444	13.4132	0.177023	5.65825	2.50802	0.910076	2.75583	0.00585429	0.035794
Gm41908	33.1542	13.5973	27.8863	19.0264	10.4534	6.15044	5.62447	13.8231	23.416	9.01284	2.59808	15.3123	-1.3851	0.50487	-2.74348	0.00607912	0.0369119
AW549542	15.1562	7.93177	13.4267	8.45618	18.0558	10.5436	36.559	50.6847	11.2427	28.9608	0.388205	14.6411	1.35597	0.494312	2.74314	0.00608552	0.0369402
Eef1a2	0	0	0	0	0.950306	0	28.1223	23.0385	0	13.0278	0	3.75376	6.08877	2.22094	2.74153	0.00611542	0.0370669
Dbh	0	0	1.03283	0	0	0	203.418	129.937	0.258206	83.3389	0.00309827	22.2984	8.04503	2.93992	2.73648	0.00621	0.0375124
Gltpd2	2.84179	9.06488	5.16413	3.17107	14.2546	13.1795	19.6856	10.1369	5.06046	14.3142	0.353528	9.85167	1.52007	0.556325	2.73234	0.00628865	0.0378683
Nr4a3	17.0507	13.5973	11.3611	8.45618	13.3043	8.78634	53.4324	78.3309	12.6163	38.4635	0.328008	18.5761	1.60512	0.58887	2.72576	0.00641542	0.038467
3300005D01Rik	13.2617	9.06488	18.5909	22.1975	11.4037	8.78634	4.68706	2.76462	15.7787	6.91042	2.28332	13.7237	-1.19404	0.438176	-2.72503	0.00642959	0.038541
Gm16833	35.996	49.8568	33.0504	12.6843	10.4534	5.2718	15.936	16.5877	32.8969	12.0622	2.72726	21.3337	-1.44883	0.532318	-2.72174	0.00649385	0.038838
Cuzd1	0.947262	46.4575	4.1313	1.05702	1.90061	1.75727	0	0.92154	13.1483	1.14486	11.4847	3.93719	-3.51144	1.29065	-2.72068	0.00651469	0.0389185
Faim2	7.5781	6.79866	1.03283	6.34214	6.65214	10.5436	26.2475	17.5093	5.43793	15.2381	0.356863	10.3636	1.48422	0.547283	2.71198	0.00668821	0.039813
Pcdhb7	12.3144	12.4642	7.22978	7.39916	22.8073	16.694	26.2475	17.5093	9.85189	20.8145	0.473317	14.2289	1.07624	0.396951	2.71127	0.00670266	0.0398497
Adgrb2	7.5781	4.53244	1.03283	6.34214	7.60245	8.78634	28.1223	14.7446	4.87137	14.8139	0.328837	8.15981	1.59396	0.588482	2.70859	0.00675701	0.0400938
Nxnl1	10.4199	4.53244	2.06565	12.6843	12.354	14.9368	28.1223	15.6662	7.42556	17.7698	0.417875	12.8602	1.24696	0.462191	2.69794	0.00697701	0.0410529
Slit1	6.63084	9.06488	7.22978	5.28511	10.4534	11.4222	29.9972	17.5093	7.05265	17.3455	0.406598	10.5746	1.30161	0.483785	2.69047	0.00713508	0.0417502
Trnp1	12.3144	14.7304	6.19695	10.5702	13.3043	27.2377	20.623	26.7247	10.953	21.9724	0.498489	16.1661	1.012	0.376205	2.69003	0.0071445	0.0417822
Mroh2a	17.998	31.7271	19.6237	24.3115	13.3043	5.2718	11.2489	14.7446	23.4151	11.1424	2.10143	15.8136	-1.07031	0.398097	-2.68856	0.00717615	0.0418976
LOC108168237	5.68357	54.3893	9.29543	9.51321	54.1675	35.1454	68.431	68.194	19.7204	56.4845	0.349129	38.2773	1.5303	0.569823	2.68556	0.00724079	0.04217
Dscaml1	4.73631	26.0615	13.4267	23.2545	5.70184	7.02907	5.62447	8.29386	16.8698	6.66231	2.53212	12.5791	-1.32462	0.493278	-2.68534	0.00724552	0.0421859
Slc47a2	7.5781	20.396	6.19695	12.6843	4.75153	4.39317	1.87482	5.52924	11.7138	4.13719	2.83135	8.2384	-1.48533	0.553686	-2.68262	0.0073049	0.0424848
Cyp2a5	3149.65	3194.24	3317.43	2941.69	2204.71	2008.56	819.297	1197.08	3150.75	1557.41	2.02307	2386.59	-1.01653	0.379189	-2.68081	0.0073444	0.0426792
Gabrg3	12.3144	2.26622	2.06565	8.45618	4.75153	7.02907	40.3087	48.8416	6.27562	25.2327	0.248709	10.7682	1.99371	0.743771	2.68055	0.00735015	0.0427009
Gm34223	11.3671	16.9966	8.2626	7.39916	4.75153	4.39317	1.87482	4.6077	11.0064	3.90681	2.81723	7.81004	-1.48628	0.556103	-2.67267	0.00752505	0.0433589
Gm9899	5.68357	6.79866	7.22978	6.34214	4.75153	9.66497	31.872	29.4893	6.51354	18.9444	0.343823	11.1435	1.54171	0.577043	2.67175	0.00754574	0.0434544
Kbtbd13	18.9452	4.53244	6.19695	14.7983	23.7577	29.8736	21.5605	19.3523	11.1182	23.636	0.470394	16.065	1.06986	0.400964	2.66821	0.00762563	0.0438188
Gm29856	3.78905	5.66555	14.4596	5.28511	21.857	17.5727	21.5605	10.1369	7.29982	17.7818	0.410522	13.0513	1.28608	0.482101	2.66766	0.00763813	0.0438549
Cacna1i	0	9.06488	2.06565	3.17107	24.708	13.1795	11.2489	2.76462	3.5754	12.9753	0.275555	8.35309	1.89903	0.712027	2.66708	0.00765138	0.043919
Dlk1	13.2617	11.3311	9.29543	20.0834	9.50306	7.90771	102.178	58.9786	13.4929	44.6418	0.302248	20.4053	1.72532	0.648618	2.65999	0.00781418	0.0446954
Xkr4	14.2089	4.53244	8.2626	5.28511	18.0558	14.0581	15.936	23.96	8.07227	18.0025	0.448397	13.326	1.13146	0.425435	2.65953	0.00782489	0.0447203
Bcan	4.73631	4.53244	2.06565	1.05702	0.950306	0.878634	45.9332	26.7247	3.09786	18.6217	0.166357	6.72203	2.58482	0.976968	2.64575	0.00815092	0.0462953
Gm35380	8.52536	19.2629	14.4596	6.34214	2.85092	5.2718	5.62447	4.6077	12.1475	4.58872	2.64725	8.53373	-1.39094	0.527782	-2.63544	0.00840284	0.0474706
Gm11127	16.1035	12.4642	23.755	11.6273	8.55276	5.2718	9.37411	4.6077	15.9875	6.95159	2.29983	10.7684	-1.21029	0.460247	-2.62966	0.00854695	0.0480838
Scn3a	15.1562	7.93177	11.3611	3.17107	11.4037	17.5727	26.2475	36.8616	9.40503	23.0214	0.408535	13.2394	1.27926	0.486619	2.62887	0.00856687	0.0481653
Gm39210	29.3651	22.6622	23.755	20.0834	4.75153	7.90771	19.6856	14.7446	23.9664	11.7724	2.03582	17.4566	-1.03043	0.393454	-2.61894	0.00882042	0.0491763
AW551984	3.78905	1.13311	0	2.11405	3.80122	0.878634	18.7482	26.7247	1.75905	12.5382	0.140295	5.06292	2.81302	1.07571	2.61504	0.00892159	0.0495785
A330033J07Rik	12.3144	33.9933	11.3611	22.1975	67.4717	54.4753	30.9346	16.5877	19.9666	42.3673	0.471273	31.9936	1.09578	0.419354	2.61302	0.00897468	0.049808

## Sheet: WT F_vs_E1 F
Gene	WT F1	WT F2	WT F3	WT F4	E1 F1	E1 F2	E1 F3	E1 F4	WT F	E1 F	Fold	Base mean	log2(FC)	StdErr	Wald-Stats	P-value	P-adj
Kl	19920.3	20232.3	20636.2	18423.4	4878.86	5357.71	4586.75	3920.64	19803.1	4685.99	4.22601	14569.9	2.07901	0.0935282	22.2287	1.81465e-109	4.3312e-105
Chgb	1.90061	3.51454	1961.06	2047.66	4.86718	0.801933	1.71853	1.84457	1003.54	2.30805	434.797	252.701	8.76139	1.50524	5.8206	5.86355e-09	3.49878e-05
Jchain	841.021	1811.74	2066.99	2515.8	360.171	122.696	348.861	320.033	1808.89	287.94	6.28217	1748.66	2.65276	0.467111	5.67908	1.35424e-08	6.46462e-05
Hsd3b1	0.950306	2.6359	8016.74	9264.24	2.92031	2.4058	0	1.84457	4321.14	1.79267	2410.45	1080.98	11.2011	2.05754	5.44391	5.21235e-08	0.000207347
Cyp11a1	3.80122	6.15044	2039.81	2106.64	9.73436	4.8116	6.87412	6.45601	1039.1	6.96902	149.103	262.833	7.22154	1.349	5.35324	8.63917e-08	0.000294571
Star	144.447	150.246	9689.08	12063.9	214.156	164.396	146.075	164.167	5511.91	172.199	32.0091	1500.75	5.00015	0.942491	5.30525	1.12517e-07	0.000335694
Gm8675	51.3165	55.3539	73.1181	65.4294	28.2297	31.2754	15.4668	21.2126	61.3045	24.0461	2.54946	60.0715	1.29993	0.249925	5.20127	1.97926e-07	0.000524901
Mgarp	2.85092	3.51454	287.785	317.01	0	0.801933	0	1.84457	152.79	0.661626	230.931	39.4078	7.71174	1.52559	5.05492	4.30574e-07	0.00102769
Cyp21a1	0.950306	0.878634	5431.36	3809.65	0.973436	0.801933	0	0	2310.71	0.443842	5206.15	577.994	12.2715	2.5401	4.83111	1.35775e-06	0.00294607
Hdc	489.408	485.006	902.727	692.077	1171.04	2299.94	919.413	1468.28	642.304	1464.67	0.438532	601.698	-1.19082	0.25472	-4.67502	2.93932e-06	0.00471324
Irf4	75.0742	96.6497	95.616	154.819	41.8578	39.2947	44.6818	61.7932	105.54	46.9069	2.24998	73.1525	1.16843	0.249462	4.6838	2.81606e-06	0.00471324
Mc2r	7.60245	7.90771	119.989	152.054	7.78749	8.82126	5.15559	3.68915	71.8882	6.36337	11.2972	21.9157	3.48167	0.744993	4.67343	2.96207e-06	0.00471324
Unc80	11.4037	10.5436	35.6216	31.3324	0	2.4058	1.71853	3.68915	22.2253	1.95337	11.3779	7.36346	3.46855	0.736405	4.71011	2.47584e-06	0.00471324
Frmd5	10.4534	7.02907	137.799	119.8	6.81405	4.00966	12.0297	7.37829	68.7705	7.55793	9.09912	21.8169	3.22881	0.710291	4.54575	5.47396e-06	0.00816578
Gm7120	75.0742	108.072	85.3044	106.899	248.226	330.396	163.26	136.498	93.8373	219.595	0.427319	204.058	-1.23191	0.272737	-4.51685	6.27673e-06	0.00881252
Trank1	17.1055	19.3299	192.169	249.737	14.6015	16.0387	15.4668	13.8343	119.586	14.9853	7.98018	40.477	2.99693	0.70294	4.26343	2.01313e-05	0.0252891
Kcnk3	43.7141	64.1403	677.748	570.433	49.6453	52.1256	44.6818	38.736	339.009	46.2972	7.32246	114.138	2.8716	0.681422	4.21413	2.50746e-05	0.029924
Pou2af1	24.708	22.8445	17.8108	19.3523	4.86718	4.8116	1.71853	9.22286	21.1789	5.15504	4.10839	18.1559	1.94984	0.464849	4.19457	2.7339e-05	0.0310727
Akr1b7	123.54	138.824	740.555	1123.36	124.6	109.865	84.2079	106.063	531.569	106.184	5.00612	197.895	2.32188	0.556698	4.17081	3.03516e-05	0.0329287
Mmd2	36.1116	53.5967	85.3044	133.623	27.2562	28.0676	29.215	31.3577	77.159	28.9741	2.66303	41.8606	1.41375	0.349271	4.0477	5.17234e-05	0.0474821
Gulo	37.0619	65.0189	40.3087	44.2339	96.3702	157.981	104.83	71.0161	46.6559	107.549	0.433809	43.2952	-1.2061	0.308327	-3.91176	9.16267e-05	0.0750593
Itih4	38.9626	13.1795	14.0612	20.2739	3.89375	4.00966	0	6.45601	21.6193	3.58985	6.02233	10.786	2.47299	0.63378	3.90197	9.54133e-05	0.0750593
Hsd3b6	0.950306	0.878634	31.872	11.98	0	0	0	0	11.4202	0	#DIV/0!	3.10846	5.87844	1.55161	3.78861	0.000151493	0.103309
Vnn3	17.1055	24.6018	68.431	81.0955	1.94687	14.4348	12.0297	5.53372	47.8085	8.48627	5.63362	17.4996	2.5083	0.670248	3.74234	0.000182311	0.120872
Gm7325	43.7141	37.7813	42.1835	22.117	6.81405	2.4058	27.4965	8.30058	36.449	11.2542	3.23869	19.1236	1.8361	0.502566	3.65344	0.000258747	0.159414
Rims4	4.75153	5.2718	141.549	163.113	4.86718	9.62319	0	2.76686	78.6713	4.31431	18.235	22.0976	4.13624	1.1347	3.64522	0.000267159	0.159414
Cyp2f2	96.9312	102.8	401.212	318.853	118.759	95.43	101.393	84.8504	229.949	100.108	2.29701	192.663	1.20031	0.331016	3.62613	0.000287704	0.163607
Cyp2c68	19.9564	34.2667	22.4979	33.1754	12.6547	6.41546	15.4668	11.9897	27.4741	11.6317	2.36201	21.8151	1.30133	0.361685	3.59796	0.000320726	0.173979
Cd79a	25.6583	25.4804	17.8108	6.45078	6.81405	2.4058	8.59265	5.53372	18.8501	5.83655	3.22966	14.8152	1.77727	0.496411	3.58024	0.000343283	0.182077
Mtus2	27.5589	26.359	26.2475	12.9016	39.9109	48.116	49.8373	60.8709	23.2667	49.6838	0.468297	26.7047	-1.09511	0.308411	-3.5508	0.000384064	0.194156
P2ry10	27.5589	22.8445	29.0597	18.4308	7.78749	8.82126	5.15559	13.8343	24.4735	8.89966	2.74993	15.8316	1.40416	0.395934	3.54645	0.000390459	0.194156
Peg10	31.3601	30.7522	454.644	308.716	36.0171	40.8986	39.5262	35.9692	206.368	38.1028	5.4161	72.8955	2.43748	0.685393	3.55632	0.000376083	0.194156
Cacna1h	40.8632	43.9317	137.799	73.7232	35.0437	24.058	29.215	22.1349	74.0794	27.6129	2.68278	46.3173	1.42872	0.40749	3.50614	0.000454651	0.213504
LOC102632305	0.950306	3.51454	0.937411	1.84308	14.6015	15.2367	5.15559	10.1452	1.81133	11.2848	0.160512	4.78987	-2.66005	0.75888	-3.50523	0.000456205	0.213504
Apoc1	150.148	113.344	110.615	105.056	29.2031	48.116	56.7115	87.6172	119.791	55.4119	2.16182	59.519	1.11254	0.318681	3.49108	0.000481076	0.220814
Oxtr	23.7577	36.9026	196.856	210.111	41.8578	36.087	29.215	19.368	116.907	31.6319	3.69585	44.3253	1.88343	0.540847	3.48238	0.000496979	0.22381
G530011O06Rik	4.75153	12.3009	8.4367	4.6077	25.3093	20.8502	8.59265	24.9017	7.5242	19.9135	0.377844	14.7261	-1.44476	0.416159	-3.47164	0.000517286	0.22864
Npy	34.211	61.5044	141.549	156.662	39.9109	51.3237	27.4965	41.5029	98.4816	40.0585	2.45845	56.7041	1.28076	0.370543	3.45643	0.000547376	0.232432
F830016B08Rik	226.173	81.713	61.8691	77.4094	46.7249	46.5121	46.4003	65.4823	111.791	51.2799	2.18002	75.4005	1.11914	0.325479	3.43843	0.000585102	0.24078
Naaladl1	41.8135	60.6258	42.1835	21.1954	128.494	160.387	56.7115	78.3944	41.4545	105.996	0.391094	46.5809	-1.36287	0.397612	-3.42764	0.000608859	0.246309
Meg3	15.2049	13.1795	210.918	223.013	20.4422	31.2754	1.71853	3.68915	115.579	14.2813	8.09301	45.1887	2.99139	0.882858	3.3883	0.000703267	0.270359
Ikzf3	113.086	52.718	40.3087	55.2924	33.0968	18.4444	34.3706	37.8137	65.3514	30.9314	2.11278	44.9428	1.09228	0.323934	3.37191	0.000746478	0.274107
Lax1	43.7141	22.8445	34.6842	41.4693	19.4687	18.4444	13.7482	16.6012	35.678	17.0656	2.09063	31.9839	1.03731	0.31068	3.33882	0.000841337	0.299717
Caln1	1.90061	0.878634	74.0555	82.9386	2.92031	0.801933	0	0.922286	39.9433	1.16113	34.4003	10.6086	5.04178	1.51877	3.31966	0.000901285	0.307312
Acsbg1	31.3601	17.5727	122.801	129.016	24.3359	23.256	27.4965	27.6686	75.1873	25.6893	2.9268	38.7314	1.55248	0.471132	3.29522	0.000983459	0.308858
Cnr1	18.0558	21.0872	50.6202	70.0371	11.6812	16.0387	13.7482	4.61143	39.9501	11.5199	3.46792	17.1692	1.80206	0.544202	3.31138	0.000928386	0.308858
LOC108168154	2.85092	14.0581	10.3115	9.2154	1.94687	0.801933	1.71853	0.922286	9.109	1.34741	6.7604	5.37284	2.8292	0.856009	3.3051	0.000949415	0.308858
Rab3c	1.90061	1.75727	61.8691	107.82	7.78749	4.00966	8.59265	2.76686	43.3368	5.78916	7.48585	14.1672	2.93538	0.886812	3.31003	0.000932844	0.308858
LOC108168152	2.85092	11.4222	40.3087	24.8816	7.78749	4.8116	3.43706	1.84457	19.8659	4.47018	4.44409	13.7813	2.13223	0.650037	3.28017	0.00103746	0.317461
D430041D05Rik	11.4037	16.694	62.8066	44.2339	7.78749	5.61353	10.3112	10.1452	33.7846	8.46434	3.9914	13.6714	2.01668	0.616841	3.26936	0.00107791	0.325666
Gsg1l	10.4534	18.4513	68.431	58.9786	16.5484	12.8309	13.7482	5.53372	39.0786	12.1653	3.21229	16.5432	1.69363	0.521769	3.24594	0.00117064	0.349261
Rn7s1	171.055	254.804	238.102	209.19	293.978	744.193	812.864	426.096	218.288	569.283	0.383443	352.84	-1.3818	0.427929	-3.22903	0.00124209	0.366002
Cacna2d2	16.1552	14.9368	23.4353	19.3523	12.6547	4.8116	1.71853	6.45601	18.4699	6.4102	2.88133	10.6261	1.45214	0.456391	3.18178	0.00146373	0.420697
4930486L24Rik	7.60245	7.90771	30.9346	45.1555	4.86718	8.01933	0	7.37829	22.9	5.0662	4.52016	10.8219	2.07704	0.658342	3.15495	0.00160526	0.445515
Rian	24.708	23.7231	155.61	243.287	18.4953	44.9082	8.59265	27.6686	111.832	24.9162	4.48833	46.2302	2.14712	0.680491	3.15526	0.00160358	0.445515
Agtr2	3.80122	6.15044	24.3727	34.097	4.86718	1.60387	1.71853	1.84457	17.1053	2.50854	6.81885	5.80341	2.75326	0.874998	3.14659	0.00165186	0.453179
Disp2	8.55276	14.0581	41.2461	27.6462	12.6547	5.61353	6.87412	6.45601	22.8758	7.89958	2.89582	14.8772	1.53157	0.49334	3.1045	0.001906	0.499917

## Sheet: WT M_vs_E1 M
Gene	WT M1	WT M2	WT M3	WT M4	E1 M1	E1 M2	E1 M3	E1 M4	WT M	E1 M	Fold	Base mean	log2(FC)	StdErr	Wald-Stats	P-value	P-adj
ATP6	392.167	317.271	240.648	174.409	59.0191	47.0362	42.9831	14.9042	281.124	40.9857	6.85907	216.714	2.76603	0.3535	7.82469	5.08913e-15	4.3876e-11
Tgfa	38.8378	38.5257	50.6084	30.6537	200.665	201.828	226.059	237.226	39.6564	216.444	0.183217	176.355	-2.4474	0.325741	-7.51331	5.76495e-14	3.3135e-10
Hist1h2bb	46.4159	49.8568	59.9039	52.8511	204.6	220.643	91.538	222.321	52.2569	184.775	0.282813	89.5636	-1.81798	0.246482	-7.37573	1.63444e-13	6.16204e-10
Hspa1a	125.986	155.236	126.005	125.786	220.338	382.276	596.987	450.853	133.253	412.614	0.322949	213.683	-1.6327	0.221719	-7.36385	1.78682e-13	6.16204e-10
Hspa1b	266.181	233.421	190.04	193.435	416.085	569.566	987.019	625.977	220.769	649.662	0.339822	358.583	-1.55774	0.224324	-6.94418	3.80677e-12	1.094e-08
Hist1h2bc	2410.78	1924.02	2093.54	2129.9	6414.4	8363.89	2605.25	6567.79	2139.56	5987.83	0.357318	2971.18	-1.48457	0.242908	-6.11167	9.85936e-10	1.5455e-06
COX3	2942.2	1398.26	1409.81	1081.33	268.537	316.425	265.858	101.846	1707.9	238.167	7.17103	1363.64	2.84084	0.481927	5.89476	3.75217e-09	4.86984e-06
COX2	1812.11	939.348	960.527	768.456	231.158	206.104	172.728	64.585	1120.11	168.644	6.64187	855.807	2.72981	0.470607	5.80061	6.60728e-09	7.12059e-06
LOC108168152	34.1014	29.4608	32.0176	23.2545	0.983652	0.855204	0	2.48404	29.7086	1.08072	27.4895	13.7813	4.93888	0.896621	5.50833	3.62256e-08	3.12319e-05
Try5	0	385.257	23.755	0	0	0	0	0	102.253	0	#DIV/0!	25.5633	23.0849	4.20664	5.48774	4.07103e-08	3.3427e-05
ND3	299.335	134.84	166.285	136.356	34.4278	25.6561	32.6353	6.21009	184.204	24.7323	7.4479	149.28	2.88534	0.542645	5.31718	1.05386e-07	8.25984e-05
Cyp4a14	211.239	122.376	124.972	100.417	253.782	282.217	674.994	382.542	139.751	398.384	0.350795	4166.24	-1.51051	0.285151	-5.29724	1.17566e-07	8.81384e-05
Hist2h2be	190.4	160.902	166.285	176.523	515.434	438.72	191.036	424.77	173.527	392.49	0.442119	267.428	-1.17482	0.223887	-5.24736	1.54292e-07	0.000102325
Grem2	315.438	287.81	316.044	281.168	114.104	101.769	151.237	149.042	300.115	129.038	2.32579	271.393	1.21967	0.232828	5.23848	1.61902e-07	0.000103396
Hmgcs2	328.7	217.557	235.484	260.028	587.24	583.249	637.582	817.248	260.442	656.33	0.396816	1053.04	-1.33193	0.260382	-5.11531	3.13221e-07	0.000174222
Slc25a25	985.153	1758.59	2261.89	2155.27	3540.16	3964.73	4206.77	3465.23	1790.22	3794.22	0.471829	2661.64	-1.08396	0.212892	-5.09162	3.55018e-07	0.000185503
Hist1h2bj	1.89452	3.39933	5.16413	7.39916	35.4115	41.905	12.7357	45.9547	4.46428	34.0017	0.131296	11.8509	-2.92904	0.576662	-5.0793	3.78825e-07	0.00019212
ATP8	37.8905	23.7953	14.4596	16.9124	3.93461	3.42082	2.38795	0	23.2644	2.43584	9.55087	15.9162	3.19572	0.646358	4.9442	7.64576e-07	0.000376674
Hspb1	57.783	118.976	102.25	110.987	210.502	183.014	267.45	212.385	97.4991	218.338	0.446552	154.348	-1.16785	0.24014	-4.8632	1.15501e-06	0.00051066
Hist2h3c2	5.68357	6.79866	11.3611	4.22809	37.3788	38.4842	17.5116	26.0824	7.01785	29.8642	0.234992	12.8193	-2.08916	0.443569	-4.70989	2.47854e-06	0.000971306
Banp	208.398	437.38	335.668	380.528	601.011	726.923	785.635	880.591	340.494	748.54	0.454877	418.859	-1.13727	0.247189	-4.60081	4.20847e-06	0.00148095
Hist1h2ac	0	4.53244	7.22978	12.6843	46.2316	31.6425	17.5116	31.0505	6.11162	31.6091	0.19335	14.3187	-2.38169	0.543792	-4.37978	1.18799e-05	0.00353182
Snord96a	62.5193	41.925	54.7397	46.509	23.6077	22.2353	25.4715	27.3244	51.4233	24.6597	2.08532	35.6299	1.07218	0.24841	4.31619	1.58745e-05	0.00434481
Fgb	64.4138	37.3926	55.7726	47.566	20.6567	29.9321	26.2674	21.1143	51.2863	24.4926	2.09395	71.4906	1.05755	0.248077	4.263	2.01703e-05	0.00519099
Zbtb16	104.199	237.953	216.893	223.032	801.676	378	304.861	573.813	195.519	514.588	0.379953	278.084	-1.39628	0.327309	-4.26595	1.99052e-05	0.00519099
Aqp8	37.8905	30.594	18.5909	22.1975	7.86922	7.69684	12.7357	3.72606	27.3182	8.00696	3.41181	17.8938	1.72485	0.414714	4.15913	3.19459e-05	0.0071538
Cpb1	0.947262	1882.09	82.626	3.17107	1.9673	0	4.7759	1.24202	492.21	1.99631	246.56	124.634	7.93513	1.95117	4.06685	4.76529e-05	0.00966681
Gm20594	72.9392	43.0582	64.0352	70.8205	29.5096	14.5385	32.6353	13.6622	62.7133	22.5864	2.7766	51.7017	1.46064	0.367587	3.9736	7.07958e-05	0.0132688
Trdn	108.935	75.9183	141.497	95.1321	258.701	214.656	169.544	293.116	105.371	234.004	0.450294	91.5844	-1.14737	0.296839	-3.8653	0.000110954	0.0182647
Klk1b16	13.2617	18.1298	7.22978	17.9694	44.2643	57.2987	46.167	17.3883	14.1476	41.2796	0.342728	18.1174	-1.56433	0.405811	-3.85482	0.000115813	0.0187748
Penk	84.3063	103.113	107.414	90.904	28.5259	47.8914	67.6586	37.2606	96.4343	45.3341	2.12719	65.7561	1.0737	0.278639	3.85337	0.000116505	0.0187748
G530011O06Rik	7.5781	5.66555	9.29543	8.45618	18.6894	27.3665	21.4915	27.3244	7.74881	23.718	0.326706	14.7261	-1.60501	0.416804	-3.85077	0.000117749	0.0187994
LOC101056014	9786.17	131257	43890.9	69301.6	36359.7	542602	167807	2.22214e+06	63559	742226	0.0856329	266670	-3.54568	0.92836	-3.81929	0.000133836	0.0204224
Tnnc1	14.2089	28.3277	26.8535	57.0792	76.7249	55.5883	61.2907	89.4253	31.6173	70.7573	0.446842	36.4977	-1.16135	0.312731	-3.71357	0.000204355	0.0296108
Pycr1	34.1014	46.4575	41.313	47.566	25.575	21.3801	21.4915	14.9042	42.3595	20.8377	2.03283	30.1067	1.00425	0.271665	3.69666	0.000218451	0.0301339
4930539E08Rik	56.8357	40.7919	32.0176	44.395	24.5913	23.9457	12.7357	18.6303	43.5101	19.9758	2.17814	31.2819	1.13184	0.310448	3.64585	0.000266511	0.0343523
D430001F17Rik	19.8925	20.396	13.4267	22.1975	1.9673	5.98643	6.36786	8.69413	18.9782	5.75393	3.2983	10.814	1.73983	0.479245	3.63035	0.000283033	0.0356229
Gm32280	4.73631	26.0615	9.29543	15.8553	34.4278	23.0905	44.575	119.234	13.9871	55.3318	0.252787	25.7984	-1.98577	0.549778	-3.61196	0.000303896	0.0371637
Gulo	11.3671	20.396	8.2626	17.9694	1.9673	2.56561	7.16385	6.21009	14.4988	4.47671	3.23871	43.2952	1.68803	0.477145	3.53776	0.00040353	0.0429511
Cd19	17.0507	10.198	18.5909	14.7983	4.91826	3.42082	5.57188	3.72606	15.1595	4.40925	3.4381	11.2744	1.7732	0.501463	3.53605	0.000406152	0.0429649
Esr2	25.5761	10.198	18.5909	20.0834	3.93461	9.40724	5.57188	3.72606	18.6121	5.65995	3.28839	15.3448	1.69058	0.479086	3.52876	0.000417515	0.0436316
Nek10	24.6288	22.6622	8.2626	8.45618	4.91826	3.42082	6.36786	1.24202	16.0024	3.98724	4.01342	13.2134	1.95122	0.561673	3.47394	0.000512869	0.0488586

## Sheet: E1 M_vs_E1 F
Gene	E1 M1	E1 M2	E1 M3	E1 M4	E1 F1	E1 F2	E1 F3	E1 F4	E1 M	E1 F	Fold	Base mean	log2(FC)	StdErr	Wald-Stats	P-value	P-adj
Ugt1a2	29.5096	27.3665	30.2474	59.6169	10573.5	12394.7	13908.1	13245	36.6851	12530.3	0.00292771	6574.76	8.46289	0.180746	46.8219	0	7.28608e-292
Xist	13.7711	14.5385	5.57188	12.4202	16629.2	16030.6	9568.77	13245	11.5754	13868.4	0.000834662	7196.47	10.2508	0.278821	36.7649	6.72799e-296	4.08634e-158
Igf2	20.6567	22.2353	21.4915	32.2925	1171.04	1693.68	1373.1	1137.18	24.169	1343.75	0.0179862	568.327	5.82231	0.214684	27.1204	5.66001e-162	4.45561e-124
Ccdc170	65.9047	73.5475	46.167	64.585	650.255	732.164	845.516	842.97	62.5511	767.727	0.0814757	374.756	3.6225	0.15062	24.0506	8.22865e-128	7.04424e-119
Abcc3	81.6431	110.321	117.01	131.654	2897.92	3704.93	4609.1	6120.29	110.157	4333.06	0.0254224	1950.88	5.29982	0.228879	23.1555	1.27953e-118	3.95904e-115
BC089597	773.151	910.792	842.946	938.966	6231.94	7900.64	8731.85	9294.8	866.464	8039.81	0.107772	4520.31	3.21425	0.13655	23.539	1.62617e-122	3.95904e-115
Chst11	2984.4	2711	2649.03	2226.94	477.957	444.271	532.744	456.532	2642.84	477.876	5.53039	1609.88	-2.47396	0.106831	-23.1577	1.21577e-118	3.74371e-101
Cyp2e1	56944.6	62632.6	51390.3	50500.5	4710.46	2497.22	3443.93	2256.84	55367	3227.11	17.1568	27907.7	-4.10105	0.188831	-21.7181	1.38278e-104	1.30939e-97
Amacr	10761.2	12066.1	12341.7	9584.66	2619.52	2433.87	2732.46	2652.5	11188.4	2609.58	4.28743	6442.86	-2.10101	0.0984796	-21.3344	5.44094e-101	1.14193e-91
Degs2	1590.57	1888.29	1928.67	1562.46	379.64	313.556	256.061	292.365	1742.5	310.405	5.61361	979.252	-2.48112	0.119978	-20.6797	5.27231e-95	3.79035e-85
Slc17a2	9.83652	7.69684	4.7759	2.48404	493.532	549.324	639.293	808.845	6.19832	622.749	0.00995317	285.74	6.61774	0.331924	19.9375	1.92501e-88	2.87108e-84
Serpinf2	11502.8	11818.1	11955.7	10014.4	1766.79	2025.68	1850.86	1992.14	11322.7	1908.87	5.93166	6364.97	-2.56812	0.129497	-19.8315	1.5907e-87	8.76425e-80
Cyp4b1	135635	153263	148966	138699	11141	6639.2	5569.75	4005.49	144141	6838.86	21.0767	72935.5	-4.39746	0.227835	-19.3011	5.26041e-83	4.40871e-78
Acsm2	184417	194597	175846	145259	49903.2	53011.8	51042	54954.4	175030	52227.9	3.35127	113430	-1.74471	0.0913761	-19.0937	2.84972e-81	3.10981e-76
Ugt8a	5266.47	6310.55	5891.07	5651.18	671.671	396.957	472.596	599.486	5779.82	535.177	10.7998	3096.95	-3.43204	0.181913	-18.8664	2.15371e-79	2.65052e-74
LOC108167727	284.275	358.33	316.801	358.943	18.4953	9.62319	10.3112	16.6012	329.588	13.7577	23.9566	164.328	-4.561	0.244866	-18.6265	1.958e-77	1.90555e-71
Cbr1	685.606	690.15	747.428	552.698	4767.89	4990.43	7300.31	5586.29	668.97	5661.23	0.118167	2907.28	3.07918	0.168558	18.2677	1.49565e-74	6.78645e-70
Fmo5	3533.28	3353.25	3229.3	5744.34	536.363	431.44	366.047	345.857	3965.04	419.927	9.44222	2021.27	-3.23625	0.17911	-18.0685	5.63997e-73	1.61136e-66
Timd2	2619.47	3130.05	2526.45	1849.37	279.376	166.802	127.171	187.224	2531.33	190.143	13.3128	1362.75	-3.72641	0.211351	-17.6314	1.41354e-69	5.07332e-63
Ces1f	35130.2	37145.8	33970.2	26560.6	4425.24	2834.83	5014.67	5215.53	33201.7	4372.57	7.59317	17830.6	-2.9252	0.170396	-17.1671	4.68473e-66	1.31801e-61
Gm30551	12.7875	14.5385	15.1237	8.69413	215.129	210.908	256.061	260.085	12.7859	235.546	0.0542822	107.675	4.16279	0.245244	16.9741	1.2779e-64	3.27288e-59
Slc22a30	3444.75	4207.6	3598.64	4015.45	371.853	135.527	125.453	252.706	3816.61	221.385	17.2397	2032.36	-4.10097	0.246388	-16.6444	3.32441e-62	9.84407e-59
Prlr	163.286	171.896	244.367	521.648	6324.42	6463.58	10300.9	9450.67	275.299	8134.88	0.0338418	4287.83	4.88953	0.294983	16.5756	1.04536e-61	2.88828e-58
Gm15348	327.556	348.923	276.206	440.917	23.3625	15.2367	6.87412	3.68915	348.401	12.2906	28.3469	166.575	-4.76584	0.292154	-16.3128	8.0083e-60	6.67122e-57
Slc22a29	109.185	129.136	103.478	101.846	948.127	1141.15	970.969	1178.68	110.911	1059.73	0.10466	592.092	3.25481	0.197163	16.5082	3.20046e-61	6.67122e-57
Gm34687	7.86922	5.13122	3.97992	11.1782	255.04	199.681	245.75	302.51	7.03963	250.745	0.0280748	122.979	5.23496	0.320908	16.3129	7.98422e-60	1.32368e-56
Acox3	10217.2	10376.2	10633.5	10159.7	3488.8	3346.46	3777.33	3078.59	10346.7	3422.79	3.02287	6837.09	-1.59691	0.0981596	-16.2686	1.65009e-59	8.83111e-56
Fbxo40	2250.6	2409.11	2153.13	2582.16	826.447	846.039	891.917	881.706	2348.75	861.527	2.72626	1624.28	-1.4475	0.0896415	-16.1476	1.18069e-58	8.83111e-56
Slco4c1	1598.43	1535.09	1490.08	1351.32	308.579	180.435	274.965	312.655	1493.73	269.158	5.54963	835.064	-2.47639	0.15336	-16.1475	1.18243e-58	8.9135e-56
Ugt2b38	20831.8	25294.4	21030.7	14703	2235.98	1799.54	1898.97	2731.81	20465	2166.58	9.44576	11431.5	-3.23939	0.200646	-16.1448	1.23461e-58	1.00925e-55
Azgp1	3722.14	3328.45	3323.23	4294.9	287.164	77.7875	127.171	73.7829	3667.18	141.476	25.9208	1899.55	-4.69692	0.291099	-16.1352	1.44452e-58	3.57742e-55
Gm31369	13.7711	24.8009	25.4715	19.8723	211.236	264.638	235.438	299.743	20.9789	252.764	0.0829982	137.448	3.57444	0.222639	16.0549	5.28545e-58	9.71722e-55
Cyp4a32	590.191	509.702	559.576	496.807	62.2999	30.4734	25.7779	21.2126	539.069	34.941	15.428	338.492	-3.93182	0.24588	-15.9908	1.48053e-57	1.09326e-54
Kif20b	1044.64	1157.95	1041.15	809.796	150.883	88.2126	120.297	161.4	1013.38	130.198	7.78338	561.619	-2.961	0.185275	-15.9816	1.71619e-57	2.0723e-53
Glt1d1	524.287	543.054	561.964	544.004	154.776	153.169	134.045	140.188	543.327	145.545	3.73306	350.833	-1.89237	0.119805	-15.7954	3.34874e-56	1.30419e-52
Cyp4a14	253.782	282.217	674.994	382.542	6496.71	7258.29	10103.2	8997.83	398.384	8214.02	0.0485005	4166.24	4.36451	0.278399	15.6771	2.16772e-55	1.97437e-51
Chst7	708.23	718.371	828.618	694.288	83.7155	58.5411	108.267	81.1612	737.377	82.9213	8.89249	364.634	-3.17782	0.204997	-15.5018	3.37281e-54	1.34742e-50
Galns	6773.43	6579.94	6432.34	5497.17	1429.98	986.377	1522.62	1216.5	6320.72	1288.87	4.90409	3643.25	-2.29637	0.149346	-15.3762	2.36401e-53	1.92776e-50
Arg2	113.12	111.177	109.05	77.0052	463.356	441.063	589.455	655.746	102.588	537.405	0.190895	302.501	2.37548	0.155167	15.3092	6.63983e-53	3.52523e-50
Lap3	17283.8	18765.7	17213.9	14562.7	6110.26	5878.97	6284.66	6736.38	16956.5	6252.57	2.71193	11095.8	-1.43952	0.093772	-15.3513	3.4712e-53	3.52523e-50
Kl	12348.8	12797.3	11930.2	13550.4	4878.86	5357.71	4586.75	3920.64	12656.7	4685.99	2.70096	14569.9	-1.43309	0.0936116	-15.3089	6.67319e-53	3.86749e-50
Pi4ka	13179	15170.5	12583.7	12369.3	6219.28	6250.26	6499.48	6090.78	13325.6	6264.95	2.12701	9556.15	-1.08931	0.0711911	-15.3013	7.49963e-53	4.53826e-50
Smarca2	13587.2	12434.7	11289.4	10497.5	4241.26	4564.6	4640.03	4524.74	11952.2	4492.66	2.66039	8007.47	-1.41194	0.092348	-15.2893	9.00989e-53	7.27189e-50
Cdh6	216.403	206.104	179.892	263.308	935.472	1107.47	1223.59	1333.63	216.427	1150.04	0.188191	685.904	2.41506	0.158291	15.2571	1.47728e-52	1.7739e-49
Ephx2	16998.5	18746.1	17174.9	15295.5	5800.71	5519.7	5843	5988.41	17053.7	5787.95	2.94642	10933.1	-1.55913	0.102593	-15.1973	3.68556e-52	8.31572e-49
Pde6a	961.028	1162.22	766.532	1055.72	159.644	151.565	106.549	84.8504	986.374	125.652	7.85005	461.416	-2.96368	0.196345	-15.0943	1.76612e-51	1.52813e-48
Galnt14	3039.48	2913.68	3000.86	3067.79	1499.09	1541.31	1379.98	1495.03	3005.45	1478.85	2.03229	2096.46	-1.01996	0.0677591	-15.0527	3.31604e-51	1.68942e-48
Ugt1a1	18.6894	15.3937	26.2674	48.4387	358.225	299.121	424.477	399.35	27.1973	370.293	0.0734481	218.45	3.80667	0.253025	15.0446	3.74403e-51	1.49019e-47
Treh	3558.85	3616.66	3559.64	3019.35	1184.67	1087.42	1302.65	1298.58	3438.62	1218.33	2.82241	2265.01	-1.49935	0.100638	-14.8985	3.37132e-50	1.73786e-47
Nat8f2	1953.53	2045.65	2111.74	1733.86	393.268	358.464	489.781	509.102	1961.2	437.654	4.48116	1068.19	-2.16852	0.145667	-14.8869	4.01186e-50	5.04683e-46
Slco3a1	6135.04	5626.39	6337.62	5866.05	1537.06	1255.83	1500.28	1356.68	5991.27	1412.46	4.24173	3502.36	-2.08554	0.142275	-14.6585	1.18837e-48	2.01167e-44
Gsta4	653.145	643.969	675.79	512.954	2617.57	3502.84	3095.07	3054.61	621.464	3067.52	0.202595	1968.74	2.30191	0.159802	14.4048	4.82971e-47	5.11785e-44
Kynu	72.7903	98.3485	91.538	197.481	1062.99	1137.14	1189.22	1219.26	115.039	1152.15	0.0998472	635.964	3.33737	0.232752	14.3388	1.25235e-46	2.2555e-43
Capg	352.147	316.425	376.5	335.345	1495.2	1360.88	2005.52	1827.05	345.104	1672.16	0.206382	942.267	2.27445	0.159788	14.2342	5.6234e-46	3.69566e-43
Myof	1338.75	1214.39	1254.47	1222.15	2595.18	2704.12	2612.16	2816.66	1257.44	2682.03	0.468838	2050.19	1.09329	0.0770017	14.1983	9.3846e-46	8.53016e-43
Cndp2	45240.1	40859.9	46484.6	24045.5	7085.64	6629.58	7544.34	8426.01	39157.5	7421.39	5.27631	23785.6	-2.39962	0.169725	-14.1383	2.2055e-45	9.92211e-43
Cpox	3339.5	3248.92	3383.72	3031.77	1264.49	1376.92	1593.08	1241.4	3250.98	1368.97	2.37476	2207.53	-1.25224	0.0886453	-14.1264	2.6112e-45	3.80627e-42
Gm36130	59.0191	64.9955	63.6786	69.553	262.828	271.053	292.15	282.22	64.3116	277.063	0.232119	167.424	2.10769	0.150225	14.0302	1.01927e-44	5.61978e-42
Osbp2	1432.2	1380.3	1431.18	1409.69	396.189	359.266	328.239	273.919	1413.34	339.403	4.1642	820.008	-2.05691	0.146909	-14.0013	1.53085e-44	3.84775e-41
Me1	11520.5	10460	10714.7	9015.81	4358.07	4180.47	4662.37	4841.08	10427.8	4510.5	2.31189	7306.81	-1.20963	0.0872578	-13.8627	1.06591e-43	1.48419e-40
Col19a1	325.589	387.407	249.143	273.244	46.7249	28.0676	39.5262	27.6686	308.846	35.4968	8.70066	152.789	-3.14186	0.228261	-13.7643	4.18004e-43	2.44692e-40
Myh1	0.983652	7.69684	3.18393	2.48404	163.537	234.164	164.979	258.24	3.58711	205.23	0.0174785	100.504	5.7834	0.421318	13.7269	7.00444e-43	2.67582e-40
Hdc	118.038	100.059	126.561	145.316	1171.04	2299.94	919.413	1468.28	122.494	1464.67	0.0836323	601.698	3.58401	0.261239	13.7193	7.78323e-43	1.00324e-39
Nap1l5	142.63	116.308	149.645	137.864	458.488	404.174	405.573	433.475	136.612	425.428	0.321116	292.529	1.64097	0.120465	13.622	2.96446e-42	2.25434e-39
Padi2	35.4115	47.0362	35.0233	42.2286	199.554	231.759	230.283	278.531	39.9249	235.032	0.16987	134.856	2.56163	0.188888	13.5616	6.76543e-42	3.00546e-39
Plppr4	142.63	147.095	144.073	109.298	402.029	466.725	436.506	508.18	135.774	453.36	0.299483	285.617	1.73176	0.127906	13.5394	9.15832e-42	3.771e-38
Slc30a2	2486.67	2337.27	2520.88	2248.05	743.705	842.029	773.338	803.312	2398.22	790.596	3.03343	1594.28	-1.60031	0.119863	-13.3511	1.16652e-40	4.56167e-38
Elovl6	835.121	803.036	937.668	891.769	3703.93	3633.56	3852.94	4830.01	866.899	4005.11	0.216448	2508.93	2.20801	0.165569	13.3358	1.43217e-40	1.11974e-37
Lipo3	1182.35	1601.8	1512.37	1398.51	275.482	235.768	293.868	348.624	1423.76	288.436	4.93613	987.538	-2.30512	0.17374	-13.2676	3.5672e-40	1.4914e-37
Atp11a	70106.9	67519.2	71874.9	77000.2	18695.8	15531	21461	19324.7	71625.3	18753.1	3.81938	44608.6	-1.93346	0.145976	-13.245	4.82008e-40	1.58237e-37
Fkbp5	4661.53	3592.71	3425.91	3321.16	915.03	785.894	946.91	640.067	3750.33	821.975	4.56258	2008.44	-2.192	0.165565	-13.2395	5.18713e-40	1.84563e-37
Hrg	164.27	144.529	155.217	231.015	7.78749	3.20773	6.87412	3.68915	173.758	5.38962	32.2394	95.2091	-5.07868	0.383966	-13.2269	6.13534e-40	2.75532e-37
Slc47a1	25358.6	27110	25624.3	23689	12732.5	12612.8	11050.1	11982.3	25445.5	12094.5	2.10389	18688.9	-1.07279	0.0812985	-13.1957	9.28659e-40	4.49816e-37
Cyp7b1	8159.39	8741.89	7879.44	5749.3	400.082	71.372	130.608	152.177	7632.51	188.56	40.4779	3751.41	-5.33781	0.40568	-13.1577	1.53684e-39	4.98872e-37
Hacl1	1178.42	1262.28	1238.55	1089.25	3784.72	3951.92	4844.53	4671.38	1192.12	4313.14	0.276394	2584.47	1.85418	0.141014	13.1489	1.72748e-39	5.64093e-37
Ldhd	34447.5	33424.8	33349.3	31342.3	7997.75	6340.08	8668.26	6719.78	33141	7431.47	4.45955	18924.2	-2.15719	0.164188	-13.1386	1.97936e-39	1.40559e-36
Erc2	1286.62	1420.49	1111.99	1074.35	484.771	391.343	433.069	450.998	1223.36	440.045	2.78008	812.725	-1.47652	0.112985	-13.0683	4.99703e-39	7.35319e-36
Gsta2	1465.64	1558.18	1802.9	1786.02	5641.06	6923.89	7042.53	8108.74	1653.19	6929.06	0.238588	4314.19	2.0675	0.159766	12.9408	2.64809e-38	1.25925e-35
Gbp3	286.243	340.371	262.674	264.55	1257.68	1350.45	1630.88	2215.33	288.46	1613.59	0.178769	979.752	2.4828	0.192489	12.8984	4.59304e-38	1.47302e-35
Upp2	523.303	803.892	669.422	678.142	109.998	61.7488	108.267	82.0835	668.69	90.5245	7.38684	385.036	-2.89993	0.225056	-12.8854	5.44077e-38	2.60295e-35
Acox1	53321.8	54959.7	55110.7	47817.7	18766.9	17381.9	22504.1	19883.6	52802.5	19634.1	2.68932	35831.1	-1.42746	0.111169	-12.8404	9.73446e-38	3.57045e-35
Bhmt	19.673	35.0634	27.8594	36.0185	274.509	201.285	371.202	227.805	29.6536	268.7	0.110359	187.686	3.17594	0.24783	12.815	1.35176e-37	6.43158e-35
Nat8f5	1309.24	1445.29	1665.2	1158.8	147.962	145.15	281.839	166.012	1394.63	185.241	7.52877	632.994	-2.92826	0.229339	-12.7683	2.46466e-37	7.56109e-35
Gm16010	210.502	201.828	171.136	136.622	1039.63	1149.17	720.064	817.146	180.022	931.502	0.19326	537.917	2.37015	0.185825	12.7548	2.93241e-37	1.07459e-34
Gm10639	58.0355	43.6154	64.4746	43.4707	352.384	724.145	462.284	807.923	52.399	586.684	0.0893139	294.788	3.48159	0.273572	12.7264	4.21719e-37	4.65352e-34
Slc12a6	6106.51	6699.67	5772.47	6751.61	3078.01	3304.76	2885.41	3158.83	6332.57	3106.75	2.03832	4411.59	-1.026	0.0813605	-12.6105	1.84774e-36	5.372e-34
C1qtnf3	5355.99	6303.71	5061.66	4001.78	1368.65	1045.72	1392.01	1680.41	5180.78	1371.7	3.77692	3113.43	-1.91794	0.152238	-12.5983	2.15783e-36	6.50833e-34
Anxa13	610.848	669.625	540.472	360.185	143.095	109.865	108.267	102.374	545.283	115.9	4.70476	292.478	-2.23448	0.177634	-12.5791	2.75129e-36	1.12318e-33
Slc22a28	2783.74	3470.42	3090.8	2774.67	501.32	526.87	345.424	499.879	3029.91	468.373	6.469	1718.11	-2.68999	0.214559	-12.5373	4.66718e-36	1.53875e-33
Mogat1	2951.94	3559.36	3748.28	2440.57	556.806	465.923	713.19	672.347	3175.04	602.066	5.27357	1719.09	-2.40193	0.191979	-12.5114	6.46502e-36	2.23748e-33
Kcnk1	970.865	1008.29	944.036	901.706	2699.34	2485.19	3878.72	3758.32	956.223	3205.39	0.298317	1888.53	1.74357	0.1397	12.4808	9.50404e-36	2.48777e-33
Kcnip2	25.575	29.0769	27.8594	26.0824	198.581	168.406	164.979	174.312	27.1484	176.569	0.153755	100.667	2.69847	0.216372	12.4715	1.0682e-35	4.78912e-33
Cndp1	2321.42	2497.2	2332.23	3083.93	940.339	846.039	1044.87	829.136	2558.69	915.095	2.7961	1620.82	-1.48599	0.1198	-12.4039	2.48836e-35	9.43299e-33
Tc2n	481.99	650.81	487.142	474.451	103.184	72.1739	111.704	116.208	523.598	100.818	5.19352	323.363	-2.38808	0.193175	-12.3623	4.18102e-35	2.73507e-32
Tmprss6	8.85287	1.71041	3.18393	17.3883	179.112	163.594	151.231	133.732	7.78387	156.917	0.0496049	79.7167	4.46906	0.36406	12.2756	1.2249e-34	4.25532e-32
Sepp1	83299.6	104237	82506.8	74039.2	26942.8	25024.3	29197.8	30650.3	86020.5	27953.8	3.07724	56207.7	-1.62169	0.132502	-12.2389	1.92539e-34	4.71724e-32
Gm31091	15.7384	12.8281	9.5518	13.6622	115.839	158.783	103.112	158.633	12.9451	134.092	0.0965394	79.9347	3.4033	0.278281	12.2297	2.15618e-34	5.66567e-32
Agps	19770.4	23220.5	20890.6	16733.7	5110.54	3789.13	5430.55	6453.24	20153.8	5195.87	3.87882	12693.8	-1.95586	0.160132	-12.214	2.61585e-34	9.46094e-32
Inmt	23675.5	26418.1	23437.7	25837.7	5143.64	3583.84	6829.43	3523.13	24842.3	4770.01	5.20801	14049.8	-2.3815	0.195663	-12.1714	4.41181e-34	1.2055e-31
Gm19950	2234.86	2294.51	2251.04	3153.49	752.466	686.454	481.188	458.376	2483.47	594.621	4.17656	1511	-2.05852	0.169413	-12.1509	5.67716e-34	1.98283e-31
Fcamr	3328.68	3746.65	2126.07	4860.02	788.483	625.507	594.611	411.34	3515.35	604.985	5.81064	2049.59	-2.53826	0.209613	-12.1093	9.42942e-34	2.16113e-31
A830021M18Rik	127.875	104.335	109.846	131.654	17.5219	8.82126	10.3112	6.45601	118.427	10.7776	10.9883	71.2249	-3.46409	0.286254	-12.1014	1.03771e-33	3.13809e-31
Slc5a8	12392	14114.3	13551.6	13613.8	3721.45	3414.63	4145.09	4592.06	13417.9	3968.31	3.38127	8569.4	-1.75779	0.145633	-12.07	1.52131e-33	7.2466e-31
Ankrd29	644.292	607.195	590.619	566.36	230.704	228.551	221.69	272.075	602.117	238.255	2.52719	397.621	-1.33321	0.1111	-12.0002	3.54651e-33	2.11535e-30
Gm40228	204.6	249.72	171.932	178.851	23.3625	4.8116	15.4668	9.22286	201.276	13.2159	15.2298	124.701	-3.97772	0.33483	-11.8798	1.50702e-32	9.32548e-30
Elovl2	777.085	798.76	754.592	556.424	1928.38	1951.1	2393.91	2409.01	721.715	2170.6	0.332496	1343.58	1.58549	0.13454	11.7845	4.69309e-32	1.0685e-29
Ccdc6	4580.87	4207.6	4252.94	5287.27	2012.09	2263.86	1966	1832.58	4582.17	2018.63	2.26994	3233.06	-1.18148	0.100362	-11.7722	5.42661e-32	1.12817e-29
Olfm4	692.491	827.837	631.215	760.115	264.775	226.145	201.068	208.437	727.915	225.106	3.23365	489.337	-1.68755	0.143415	-11.7669	5.78176e-32	1.70283e-29
Gm31774	93.4469	132.557	138.501	188.787	7.78749	7.21739	1.71853	8.30058	138.323	6.256	22.1104	75.1256	-4.35468	0.3712	-11.7313	8.80543e-32	1.75738e-29
Pank1	12962.6	14328.1	14174.1	12307.2	4080.64	3626.34	4617.69	4958.21	13443	4320.72	3.11128	8793.46	-1.63788	0.139704	-11.7239	9.60876e-32	2.67964e-29
Acsm3	24867.7	25687.8	25799.4	14110.6	759.28	143.546	211.379	138.343	22616.4	313.137	72.2251	13990.5	-6.17393	0.528108	-11.6907	1.42278e-31	2.77956e-29
Acnat1	1337.77	1495.75	1166.12	1531.41	3227.91	3484.4	3193.03	3676.23	1382.76	3395.39	0.407246	2406.01	1.29751	0.111024	11.6868	1.48866e-31	3.71497e-29
Irf6	2595.86	2987.23	2617.19	2611.97	1113.61	1230.16	1101.58	1265.38	2703.06	1177.68	2.29524	1907.7	-1.19716	0.10266	-11.6614	2.00679e-31	5.88895e-29
Gm27216	260.668	424.181	338.293	340.313	66.1937	45.7102	73.8968	83.9281	340.864	67.4322	5.05491	190.893	-2.35161	0.202352	-11.6214	3.20835e-31	6.83004e-29
Ces2c	4704.81	5563.96	4717	3706.18	839.102	701.691	915.976	1485.8	4672.99	985.643	4.74105	2651.2	-2.2451	0.193409	-11.608	3.75259e-31	7.99445e-29
Gimap8	418.052	394.249	406.747	389.994	849.81	873.305	940.035	1007.14	402.261	917.572	0.438397	685.634	1.18825	0.10249	11.5938	4.42927e-31	1.10826e-28
Hsd17b11	8916.81	6130.1	6197.52	5664.85	1657.76	1543.72	2163.63	1767.1	6727.32	1783.05	3.77292	4473.69	-1.91709	0.165765	-11.5651	6.19142e-31	1.75078e-28
Acy3	46797.2	45000	46829.3	35716.7	10543.3	9039.38	12718.8	12077.3	43585.8	11094.7	3.92852	27302.8	-1.97416	0.171293	-11.5251	9.86175e-31	2.57287e-28
Baat	21.6403	38.4842	30.2474	32.2925	203.448	220.531	187.32	246.25	30.6661	214.387	0.143041	149.233	2.80617	0.244202	11.4912	1.46112e-30	2.75847e-28
Ugt1a7c	6356.36	6892.09	6424.38	5279.82	2390.76	2271.07	3026.33	2340.76	6238.16	2507.23	2.48807	4466.68	-1.31723	0.114697	-11.4845	1.57926e-30	3.89932e-28
Ubiad1	2668.65	2696.46	2567.05	2614.45	1238.21	1125.91	1099.86	1139.95	2636.65	1150.98	2.29078	1859.92	-1.19504	0.104418	-11.4448	2.49713e-30	9.04741e-28
Fbxl2	223.289	265.113	277.798	309.263	88.5827	77.7875	68.7412	84.8504	268.866	79.9904	3.36122	186.043	-1.73317	0.152309	-11.3793	5.30505e-30	1.07894e-27
Csgalnact1	693.475	841.521	716.385	666.964	251.147	232.56	247.468	290.52	729.586	255.424	2.85637	545.374	-1.5145	0.133281	-11.3632	6.37628e-30	1.50059e-27
Gc	1152.84	1364.05	942.444	1029.63	3258.09	3741.02	4353.03	4442.65	1122.24	3948.7	0.284206	2444.07	1.81446	0.160094	11.3337	8.93742e-30	2.22817e-27
Nat8	3753.62	3802.24	4580.88	3133.61	1050.34	767.449	1273.43	822.68	3817.59	978.474	3.90157	2264.84	-1.96762	0.175174	-11.2324	2.82669e-29	9.39089e-27
Sdc2	3780.17	4108.4	3878.83	3311.22	1497.15	1477.16	1651.51	1843.65	3769.66	1617.37	2.33074	2704.51	-1.22164	0.109369	-11.1699	5.72324e-29	1.48859e-26
Slc46a3	1359.41	1523.97	1222.63	1023.42	513.001	564.561	539.618	582.885	1282.36	550.016	2.33149	838.221	-1.22183	0.109795	-11.1283	9.14091e-29	2.35451e-26
Tmigd1	8197.76	9780.11	7815.76	4955.65	1974.13	1336.02	1648.07	1872.24	7687.32	1707.61	4.50179	4370.81	-2.1707	0.195795	-11.0866	1.45669e-28	4.50463e-26
Cadm1	1240.39	1360.63	1104.82	1157.56	460.435	400.966	476.033	446.387	1215.85	445.955	2.7264	796.67	-1.45023	0.131507	-11.0278	2.80772e-28	4.75727e-26
Lyplal1	949.224	1111.77	1054.68	895.495	2663.32	2743.41	3414.72	3891.13	1002.79	3178.14	0.315527	2051.12	1.66298	0.150876	11.0222	2.98716e-28	5.32521e-26
Trdn	258.701	214.656	169.544	293.116	17.5219	16.0387	3.43706	30.4355	234.004	16.8583	13.8807	91.5844	-3.71775	0.337628	-11.0114	3.36836e-28	5.90701e-26
Gm34861	110.169	122.294	121.785	136.622	30.1765	16.0387	32.6521	18.4457	122.718	24.3282	5.04425	82.2757	-2.39824	0.217995	-11.0014	3.76364e-28	1.43291e-25
Cyp2d9	5875.35	6094.18	6209.46	5895.86	650.255	172.416	458.847	220.426	6018.72	375.486	16.0291	3065.45	-4.00468	0.36674	-10.9197	9.28254e-28	1.534e-25
Ttc39c	1329.9	1591.53	1311.78	1401	543.177	491.585	532.744	700.938	1408.55	567.111	2.48373	996.276	-1.31125	0.120154	-10.913	9.98631e-28	1.70725e-25
Cbs	8358.09	7642.96	7863.52	7992.39	2781.11	2559.77	2553.73	2048.4	7964.24	2485.75	3.20396	4949.68	-1.67999	0.15409	-10.9027	1.1193e-27	2.10134e-25
Fhl1	4983.18	5548.56	5209.71	7124.22	2471.55	2734.59	2096.61	2157.23	5716.42	2364.99	2.4171	3808.65	-1.27165	0.116853	-10.8825	1.39664e-27	2.10134e-25
Aadat	9360.43	11129.6	9108.43	6723.05	27191	29573.7	35516.8	38928.8	9080.38	32802.6	0.276819	19593.4	1.85282	0.17109	10.8295	2.49476e-27	5.91722e-25
Gm41713	17.7057	13.6833	12.7357	36.0185	146.015	114.676	185.601	195.525	20.0358	160.454	0.124869	90.478	3.05213	0.282959	10.7865	3.98871e-27	6.43602e-25
Znrf1	4245.44	4760.92	3635.25	2495.22	1129.19	971.14	1245.93	1116.89	3784.21	1115.79	3.39151	2720.86	-1.7637	0.163637	-10.7781	4.36814e-27	6.91913e-25
Adh1	15333.2	16809	15266.2	12948	3619.24	3002.44	4667.53	3595.99	15089.1	3721.3	4.0548	9452.61	-2.02031	0.187572	-10.7708	4.72797e-27	1.02911e-24
Dgkg	482.973	616.602	522.165	653.302	236.545	224.541	170.134	170.623	568.76	200.461	2.83726	426.685	-1.49292	0.139089	-10.7336	7.07962e-27	1.22501e-24
Srd5a1	732.821	741.462	771.308	861.961	297.872	287.894	331.676	282.22	776.888	299.915	2.59036	533.232	-1.37788	0.128571	-10.7169	8.48382e-27	1.70381e-24
Angptl3	177.057	239.457	185.464	140.348	568.487	639.942	776.775	817.146	185.582	700.587	0.264894	426.624	1.90923	0.179437	10.6401	1.93905e-26	6.18211e-24
Kyat1	2694.22	3195.9	2910.11	3440.39	1150.6	951.894	1122.2	930.587	3060.16	1038.82	2.9458	1986.34	-1.55974	0.147652	-10.5636	4.39561e-26	7.40096e-24
Ces1g	2471.92	1014.27	1783	3809.27	298.845	149.159	293.868	203.825	2269.62	236.425	9.59975	1628.29	-3.26653	0.309739	-10.5461	5.2964e-26	8.09622e-24
Kcnk5	8057.09	6437.98	6571.64	8350.09	2725.62	2840.45	2268.46	2070.53	7354.2	2476.26	2.96988	4747.15	-1.5697	0.14897	-10.537	5.83134e-26	8.71907e-24
Hao2	8245.96	8815.44	7870.68	9285.33	27478.2	31957.8	33686.6	38941.7	8554.35	33016.1	0.259097	19260.9	1.94848	0.18505	10.5295	6.32021e-26	1.1061e-23
Them7	3931.66	4706.19	4030.86	3440.39	1644.13	1551.74	1895.54	2029.95	4027.27	1780.34	2.26208	2959.49	-1.17912	0.112229	-10.5064	8.06888e-26	1.18853e-23
Il34	677.736	629.43	674.198	515.438	144.069	149.159	151.231	136.498	624.2	145.239	4.29774	347.499	-2.10615	0.200604	-10.4991	8.72504e-26	1.32678e-23
LOC102638797	120.006	149.661	107.458	151.526	462.382	432.242	443.381	723.995	132.163	515.5	0.256377	321.636	1.96984	0.187818	10.4881	9.80126e-26	1.37504e-23
Ctnna2	119.022	141.109	81.1903	85.6993	10.7078	8.01933	3.43706	9.22286	106.755	7.84676	13.605	49.2314	-3.69348	0.352293	-10.4841	1.02213e-25	2.32716e-23
AW822252	159.352	199.263	171.136	155.252	37.964	35.285	39.5262	36.8915	171.251	37.4167	4.57686	103.76	-2.20539	0.211373	-10.4337	1.74061e-25	2.45141e-23
Adrb2	481.006	505.426	494.305	332.861	143.095	113.072	116.86	146.644	453.399	129.918	3.4899	285.359	-1.80198	0.172836	-10.426	1.88738e-25	2.48792e-23
Nr1i2	102.3	103.48	137.705	113.024	267.695	311.952	326.521	301.588	114.127	301.939	0.377981	212.07	1.39473	0.133746	10.4281	1.84487e-25	2.48792e-23
Cmtm6	10173.9	10147.8	10017.4	7575.07	4124.45	3938.29	3626.1	4697.21	9478.57	4096.51	2.31382	6665.94	-1.20991	0.116052	-10.4256	1.89531e-25	2.77867e-23
Gulo	1.9673	2.56561	7.16385	6.21009	96.3702	157.981	104.83	71.0161	4.47671	107.549	0.0416248	43.2952	4.59316	0.441936	10.3933	2.66076e-25	3.58341e-23
Ttyh2	2400.11	2402.27	2561.47	2487.76	1231.4	1218.94	1215	1176.84	2462.9	1210.54	2.03454	1760.42	-1.02482	0.0986495	-10.3885	2.79605e-25	3.94509e-23
Ces2h	161.319	137.688	121.785	140.348	35.0437	19.2464	30.9335	24.9017	140.285	27.5313	5.09547	85.7932	-2.37509	0.228841	-10.3788	3.09647e-25	5.86256e-23
Slc22a2	9450.93	10112.8	9437.97	7344.06	3294.11	3550.96	3639.84	4452.8	9086.44	3734.43	2.43315	6122.99	-1.28289	0.124066	-10.3403	4.62855e-25	8.05165e-23
Gm29012	90.496	102.624	98.7019	122.96	20.4422	15.2367	22.3409	14.7566	103.696	18.1941	5.69941	59.3098	-2.54659	0.247017	-10.3093	6.39403e-25	1.48273e-22
Foxq1	111.153	89.7964	131.337	134.138	486.718	614.28	582.581	304.355	116.606	496.984	0.234628	300.508	2.09256	0.204154	10.2499	1.18432e-24	1.55032e-22
Aspg	1775.49	1768.56	1633.36	1833.22	478.931	416.203	383.232	461.143	1752.66	434.877	4.03024	956.017	-2.00895	0.19609	-10.2451	1.24547e-24	1.71748e-22
Syt14	1372.19	1488.05	1359.54	1546.31	708.662	740.184	586.018	708.316	1441.53	685.795	2.10198	1020.78	-1.06546	0.104104	-10.2346	1.38768e-24	1.72389e-22
Odc1	34282.2	40320.3	31610.9	19091.1	7680.41	8458.78	7910.39	9248.69	31326.1	8324.57	3.76309	19317.9	-1.91191	0.186825	-10.2337	1.40082e-24	2.73978e-22
Hykk	11044.4	10414.7	10865.2	15057	4834.08	5147.61	4937.33	5172.18	11845.3	5022.8	2.35831	8268.3	-1.23744	0.121458	-10.1882	2.23898e-24	3.01738e-22
Cckar	3983.79	4643.76	3757.04	3503.73	1289.8	1249.41	1501.99	1770.79	3972.08	1453	2.73371	2602.35	-1.45153	0.142611	-10.1783	2.47977e-24	3.07419e-22
Mgat4a	1025.95	1033.09	1104.03	1183.64	2290.5	2269.47	2632.79	2929.18	1086.68	2530.48	0.429435	1784.77	1.21969	0.119942	10.169	2.72746e-24	3.49398e-22
Paqr7	2791.6	2375.76	3008.82	2887.69	930.605	881.324	1141.1	1080	2765.97	1008.26	2.74331	1752.43	-1.45785	0.14386	-10.1339	3.9092e-24	7.76246e-22
Cd36	19334.7	24250.2	19976	14314.3	4842.85	4445.11	5492.42	7191.07	19468.8	5492.86	3.54438	12602.1	-1.82563	0.18129	-10.0702	7.4832e-24	8.76101e-22
Selenbp2	515.434	517.398	401.175	349.007	107.078	105.053	159.823	143.877	445.754	128.958	3.45659	274.121	-1.80669	0.179179	-10.0832	6.55861e-24	8.76101e-22
Nhp2	1170.55	1117.75	1178.85	893.011	369.906	363.275	436.506	445.464	1090.04	403.788	2.69954	674.268	-1.4369	0.142682	-10.0707	7.448e-24	1.39054e-21
Tmem56	1700.73	1849.81	1829.96	1928.85	747.599	778.677	874.731	964.712	1827.34	841.43	2.17171	1363.03	-1.11979	0.11171	-10.0241	1.19415e-23	1.49131e-21
Aldh1b1	70.823	74.4027	71.6385	47.1967	202.475	233.362	206.223	283.142	66.0152	231.301	0.285409	135.428	1.79928	0.179628	10.0167	1.28757e-23	1.58141e-21
Slc22a22	3647.38	4076.76	3856.54	3245.39	1099.98	1023.27	1386.85	1452.6	3706.52	1240.68	2.9875	2421.66	-1.58045	0.157882	-10.0103	1.37267e-23	2.03716e-21
Macrod2	5883.22	5863.28	5466.81	4913.43	2029.61	1921.43	2416.25	2605.46	5531.68	2243.19	2.46599	3813.38	-1.30302	0.130501	-9.98474	1.77766e-23	2.42937e-21
Oat	6512.76	7034.05	6132.25	5382.91	12603.1	13925.6	14329.1	15841.2	6265.49	14174.7	0.442018	9669.91	1.17761	0.118449	9.94193	2.73477e-23	4.30552e-21
Lrp8	63.9374	29.9321	62.8827	47.1967	188.847	190.058	226.846	279.453	50.9872	221.301	0.230398	138.795	2.1153	0.21348	9.90868	3.8167e-23	4.34745e-21
Msrb1	4358.56	4749.8	3975.14	3206.89	1675.28	1860.48	1986.62	1848.26	4072.6	1842.66	2.21017	2764.57	-1.14548	0.115782	-9.89341	4.44598e-23	5.12016e-21
Cyp2d26	4243.48	3784.28	3993.45	3512.43	8083.41	8231.84	8987.91	7030.59	3883.41	8083.44	0.480415	5699.1	1.05707	0.106885	9.88979	4.60977e-23	5.20318e-21
Fabp1	17.7057	21.3801	15.9197	21.1143	134.334	105.053	178.727	173.39	19.03	147.876	0.128689	95.7728	2.95804	0.299165	9.88767	4.70854e-23	6.10577e-21
LOC108167577	101.316	138.543	86.7621	98.1195	3.89375	0	0	2.76686	106.185	1.66515	63.7691	55.848	-5.9038	0.598087	-9.87113	5.55352e-23	6.72104e-21
Fbp2	459.366	468.652	477.59	352.733	824.501	902.976	933.161	1040.34	439.585	925.244	0.475102	652.965	1.06848	0.108586	9.83987	7.58105e-23	1.40936e-20
Aldh3a2	10790.7	11691.5	10391.6	8684.19	4524.53	4583.04	4968.27	5505.13	10389.5	4895.24	2.12236	7392.16	-1.08594	0.110976	-9.78535	1.3014e-22	1.44514e-20
Dnajc22	3460.49	3739.81	3609.78	3047.91	1612.01	1454.71	1424.66	1650.89	3464.5	1535.57	2.25617	2254.41	-1.17346	0.120185	-9.76382	1.60981e-22	2.08744e-20
Acot3	417.068	440.43	440.975	463.273	1352.1	1352.06	1911	2044.71	440.437	1664.97	0.264531	1049.16	1.918	0.19823	9.67565	3.82642e-22	4.1543e-20
Smlr1	392.477	386.552	405.155	329.135	140.175	167.604	195.912	174.312	378.33	169.501	2.23202	250.494	-1.17511	0.121498	-9.67188	3.97036e-22	4.28763e-20
Setd4	90.496	76.1131	90.7421	85.6993	212.209	258.222	202.786	203.825	85.7626	219.261	0.391144	143.262	1.36287	0.140965	9.66815	4.11758e-22	4.51822e-20
Gm4208	306.899	417.34	145.665	262.066	47.6984	22.4541	46.4003	52.5703	282.992	42.2808	6.69317	147.468	-2.75597	0.285229	-9.66229	4.35989e-22	5.52642e-20
Slc7a12	72.7903	53.8778	152.033	440.917	6125.83	5773.11	7444.67	8065.4	179.904	6852.25	0.0262548	3428.66	5.25469	0.545601	9.63102	5.91412e-22	6.65801e-20
Cdca7l	74.7576	59.0091	74.0264	90.6674	197.608	232.56	190.757	199.214	74.6151	205.035	0.363915	147.955	1.47895	0.154145	9.59451	8.43197e-22	9.00087e-20
Tenm4	260.668	257.416	310.433	402.414	987.064	1059.35	1416.07	1284.75	307.733	1186.81	0.259295	715.477	1.94889	0.203516	9.57611	1.00772e-21	1.03342e-19
Gm42060	105.251	82.0996	72.4345	60.8589	3.89375	2.4058	0	2.76686	80.1609	2.2666	35.3661	58.7334	-4.99563	0.521829	-9.57331	1.03538e-21	1.09183e-19
Myom3	130.826	149.661	94.722	78.2472	21.4156	20.0483	18.9038	13.8343	113.364	18.5505	6.11109	70.8153	-2.61883	0.273731	-9.56715	1.09894e-21	1.20251e-19
Arhgef39	460.349	364.317	392.42	421.044	212.209	194.87	180.446	209.359	409.532	199.221	2.05567	295.039	-1.02894	0.107745	-9.54973	1.30035e-21	1.32957e-19
Cyb5a	22594.5	25203.7	22827.2	17998.1	8161.29	8241.46	9787.02	9871.23	22155.9	9015.25	2.4576	15531.4	-1.29748	0.135928	-9.54534	1.35664e-21	1.65017e-19
Maats1	8.85287	4.27602	4.7759	1.24202	67.1671	51.3237	79.0523	96.8401	4.7867	73.5958	0.0650404	34.31	3.8973	0.409275	9.52245	1.69139e-21	2.34965e-19
Gm4956	254.766	289.914	207.752	299.326	78.8483	84.2029	97.9562	86.6949	262.94	86.9256	3.02488	159.224	-1.60449	0.169157	-9.4852	2.41919e-21	2.82503e-19
Hsd17b2	394.444	409.643	429.035	273.244	128.494	106.657	85.9265	137.421	376.592	114.624	3.28544	246.592	-1.70518	0.180338	-9.4555	3.21495e-21	3.20342e-19
Ceacam2	454.447	340.371	304.861	531.584	1105.82	1265.45	1111.89	1281.98	407.816	1191.28	0.342333	807.394	1.55214	0.16444	9.43894	3.76562e-21	3.58705e-19
Ston2	1545.32	1436.74	1350.78	1603.45	2827.83	2776.29	3679.37	3440.13	1484.07	3180.91	0.466557	2324.73	1.09947	0.116328	9.45142	3.34259e-21	3.58705e-19
Gm39079	4790.39	4986.69	4597.6	3533.54	2106.52	2047.33	2275.33	2056.7	4477.06	2121.47	2.11035	3331.99	-1.07878	0.114294	-9.43865	3.77601e-21	4.96298e-19
Gm35925	5.90191	4.27602	4.7759	34.7765	160.617	129.111	156.386	210.281	12.4326	164.099	0.0757628	95.2533	3.82311	0.408218	9.36536	7.57895e-21	8.89982e-19
Gm34472	242.962	252.285	221.283	183.819	72.0343	44.1063	56.7115	49.8035	225.087	55.6639	4.04369	139.509	-2.02534	0.21681	-9.34157	9.49193e-21	9.45823e-19
Angptl7	595.11	563.579	643.95	674.416	181.059	173.217	168.416	118.053	619.264	160.186	3.8659	378.522	-1.95217	0.209132	-9.33466	1.01312e-20	1.28839e-18
Ppt2	3697.55	3358.39	3894.74	3733.51	1483.52	1503.62	1503.71	1464.59	3671.05	1488.86	2.46567	2417.67	-1.30204	0.140045	-9.29731	1.44048e-20	1.33768e-18
Nt5c3b	163.286	137.688	184.668	151.526	328.048	349.643	458.847	360.614	159.292	374.288	0.425587	256.521	1.21841	0.131061	9.29651	1.45138e-20	1.68315e-18
Dsg2	319.687	288.204	263.47	372.606	698.927	732.966	970.969	876.172	310.992	819.759	0.37937	579.338	1.3997	0.151015	9.26862	1.88568e-20	1.74709e-18
G630018N14Rik	0	6.84163	2.38795	0	70.0874	61.7488	79.0523	59.9486	2.3074	67.7093	0.034078	32.9484	4.71731	0.50906	9.26671	1.91979e-20	2.28754e-18
Hsd11b1	4513.98	5517.78	3963.2	3288.87	1505.91	1465.93	1491.68	1637.98	4320.95	1525.38	2.83272	3009.37	-1.50233	0.162635	-9.23746	2.52423e-20	2.98434e-18
Eva1c	48.199	35.0634	38.2072	32.2925	158.67	122.696	190.757	221.349	38.4405	173.368	0.221728	102.785	2.16442	0.235046	9.20851	3.3069e-20	3.22002e-18
Sucnr1	950.208	1191.3	1189.99	1092.98	408.843	297.517	434.788	439.931	1106.12	395.27	2.79839	797.883	-1.4888	0.161854	-9.19839	3.63366e-20	3.24031e-18
Tmem26	679.704	814.154	682.157	827.184	335.836	336.812	312.772	269.308	750.8	313.682	2.39351	545.341	-1.25773	0.136735	-9.19833	3.63542e-20	3.98938e-18
Atp13a4	0	0	0	0	127.52	138.734	120.297	112.519	0	124.768	0	59.8233	9.47613	1.03276	9.17551	4.49424e-20	3.99875e-18
Kyat3	1579.75	1826.72	1469.38	1546.31	3637.73	3503.64	4273.98	4939.77	1605.54	4088.78	0.39267	2767.1	1.34829	0.146955	9.17482	4.52326e-20	4.14249e-18
Dfnb59	15.7384	3.42082	6.36786	6.21009	75.928	70.5701	80.7709	64.5601	7.9343	72.9573	0.108753	38.1915	3.21405	0.350474	9.17058	4.70498e-20	4.42801e-18
Spp1	18045.1	18834.2	17538.7	11943.3	41386.6	43706.1	46460.4	55953.3	16590.3	46876.6	0.353914	32564.6	1.49845	0.163571	9.16085	5.14922e-20	4.50536e-18
Hsd3b3	1743.03	1829.28	1578.43	1740.07	799.191	635.933	934.88	881.706	1722.7	812.927	2.11914	1273.12	-1.08782	0.118887	-9.15006	5.69035e-20	5.53052e-18
Smim10l2a	134.76	181.303	160.789	140.348	54.5124	41.7005	30.9335	46.1143	154.3	43.3152	3.56226	102.417	-1.80866	0.197944	-9.1372	6.40917e-20	6.18847e-18
Dnph1	614.783	549.896	623.255	479.419	229.731	228.551	235.438	273.919	566.838	241.91	2.34318	386.13	-1.22942	0.134737	-9.1246	7.20021e-20	6.38051e-18
Gm35815	0	0	0	0	129.467	114.676	125.453	155.866	0	131.366	0	60.1063	9.54748	1.04677	9.12086	7.45311e-20	6.94098e-18
D030045P18Rik	26.5586	11.9729	27.8594	23.5984	97.3436	85.8068	111.704	117.13	22.4973	102.996	0.218428	60.3971	2.19322	0.240826	9.10707	8.46404e-20	7.60578e-18
Vstm5	164.27	165.91	178.3	221.079	412.737	346.435	379.795	454.687	182.39	398.414	0.45779	295.165	1.13633	0.124931	9.09567	9.40089e-20	8.36301e-18
Gm1653	68.8556	132.557	88.3541	49.6807	1.94687	3.20773	0	2.76686	84.8618	1.98037	42.8516	41.3291	-5.24731	0.577328	-9.08894	1.00006e-19	8.44114e-18
Fbxo36	644.292	643.113	593.007	539.036	288.137	257.42	323.083	318.189	604.862	296.707	2.03858	449.805	-1.0364	0.114047	-9.08751	1.0133e-19	9.10128e-18
Cpb2	11.8038	14.5385	22.2875	9.93615	87.6093	67.3623	92.8006	116.208	14.6415	90.9951	0.160904	49.9737	2.59258	0.285561	9.0789	1.09674e-19	9.42382e-18
Mfsd7c	529.205	606.34	589.823	700.499	1386.17	1425.84	1340.45	1354.84	606.467	1376.83	0.440482	963.411	1.1848	0.13118	9.03185	1.68798e-19	1.52795e-17
Itih1	219.354	191.566	237.999	250.888	68.1405	53.7295	70.4597	89.4618	224.952	70.4479	3.19316	148.952	-1.67708	0.185915	-9.02067	1.86946e-19	1.5622e-17
0610031O16Rik	103.283	100.059	81.9862	48.4387	7.78749	4.00966	5.15559	11.9897	83.4418	7.23562	11.5321	52.4526	-3.5114	0.389384	-9.01783	1.91858e-19	1.67752e-17
Clic6	4.91826	9.40724	18.3076	4.96807	180.086	169.208	103.112	191.836	9.4003	161.06	0.0583651	64.7181	4.05792	0.450399	9.00961	2.06796e-19	1.77265e-17
Nt5e	5329.43	6087.34	4636.6	4017.93	1873.86	1805.95	1792.43	2393.33	5017.82	1966.39	2.55179	3315.88	-1.3512	0.150081	-9.00315	2.19341e-19	1.78718e-17
Sytl3	28.5259	23.0905	25.4715	26.0824	93.4499	109.865	113.423	136.498	25.7926	113.309	0.22763	65.8485	2.13953	0.237676	9.00184	2.21964e-19	2.14624e-17
Cyp4a12a	1599.42	1752.31	1775.04	2143.72	112.919	33.6812	22.3409	6.45601	1817.62	43.8492	41.4517	907.871	-5.36718	0.599684	-8.95001	3.55434e-19	3.07526e-17
Akr1c18	600.028	747.448	335.109	296.842	3554.99	2331.22	5282.76	7653.13	494.857	4705.52	0.105165	2208.28	3.24857	0.36334	8.94085	3.862e-19	3.24043e-17
Pcolce2	55.0845	61.5747	44.575	32.2925	138.228	168.406	201.068	201.981	48.3817	177.421	0.272695	109.432	1.85455	0.208307	8.90298	5.43649e-19	5.24916e-17
Clip4	587.24	629.43	798.371	719.129	319.287	313.556	369.484	307.121	683.543	327.362	2.08803	528.381	-1.06978	0.120523	-8.87615	6.92151e-19	5.65668e-17
Gm36897	3.93461	2.56561	1.59197	0	39.9109	64.9565	73.8968	65.4823	2.02305	61.0616	0.0331312	26.9471	4.84336	0.545987	8.87083	7.26052e-19	6.10193e-17
Pecr	9189.28	9379.02	9282.75	6182.77	3125.7	3318.4	3557.36	4395.62	8508.46	3599.27	2.36394	5818.48	-1.24139	0.14008	-8.86199	7.86019e-19	6.42392e-17
Tgfb2	69.8393	70.9819	67.6586	83.2152	190.794	210.106	295.587	251.784	72.9238	237.068	0.307607	156.997	1.69783	0.191719	8.85585	8.30462e-19	8.79419e-17
Etv1	640.358	708.964	721.957	835.879	377.693	394.551	297.306	325.567	726.789	348.779	2.08381	512.223	-1.04905	0.118961	-8.81842	1.16085e-18	9.47454e-17
Abcb1b	319.687	276.231	254.715	396.204	732.024	781.082	1031.12	871.561	311.709	853.946	0.365022	635.63	1.45621	0.165268	8.81122	1.23796e-18	9.89143e-17
Ugt2b37	2870.3	3913.41	3131.4	3906.15	224.864	20.0483	41.2447	28.5909	3455.31	78.6869	43.9122	1983.53	-5.45427	0.619381	-8.80599	1.297e-18	1.16618e-16
Etnppl	565.6	669.625	529.329	732.791	261.854	214.918	262.935	264.696	624.336	251.101	2.4864	420.646	-1.31574	0.149736	-8.78711	1.53452e-18	1.22462e-16
Fgb	20.6567	29.9321	26.2674	21.1143	96.3702	117.082	113.423	92.2286	24.4926	104.776	0.233762	71.4906	2.07775	0.237463	8.74975	2.13818e-18	1.74062e-16
Mmp2	147.548	163.344	173.524	137.864	347.517	368.889	286.994	373.526	155.57	344.232	0.451934	257.883	1.14769	0.131368	8.73647	2.405e-18	2.38594e-16
Sh3bp2	958.077	706.398	529.329	535.31	179.112	254.213	197.631	164.167	682.279	198.781	3.43232	432.637	-1.77749	0.204436	-8.69458	3.48102e-18	2.73747e-16
Adamts8	39.3461	57.2987	30.2474	44.7127	153.803	148.358	171.853	255.473	42.9012	182.372	0.23524	107.379	2.0921	0.240826	8.68717	3.71586e-18	3.28572e-16
Hpgd	292.145	365.172	304.861	219.837	711.582	771.459	957.221	988.691	295.504	857.238	0.344716	583.072	1.53119	0.176689	8.66601	4.47522e-18	3.42725e-16
Gm41784	75.7412	67.5611	65.2706	37.2606	6.81405	2.4058	12.0297	7.37829	61.4584	7.15696	8.58722	36.1373	-3.25145	0.375421	-8.66082	4.6838e-18	3.48815e-16
Tm4sf4	60.9864	78.6788	87.5581	48.4387	10.7078	10.4251	6.87412	8.30058	68.9155	9.0769	7.5924	32.8606	-2.89909	0.33582	-8.63285	5.98442e-18	4.61777e-16
Cyp2d12	4986.13	4862.69	6985.55	4424.07	1835.9	1742.6	1184.07	1053.25	5314.61	1453.95	3.65528	3185.21	-1.86926	0.21671	-8.62562	6.37479e-18	5.53306e-16
Zfp385b	109.185	92.362	122.581	125.444	282.297	243.788	257.779	237.028	112.393	255.223	0.440373	189.188	1.18658	0.137902	8.60452	7.66387e-18	5.97605e-16
Gm16146	479.039	441.285	370.928	663.238	222.917	174.019	159.823	150.333	488.622	176.773	2.76412	318.984	-1.45882	0.169724	-8.5953	8.30504e-18	6.03827e-16
Ftcd	529.205	466.086	464.058	493.081	178.139	80.1933	116.86	89.4618	488.108	116.163	4.2019	269.802	-2.07459	0.241407	-8.59373	8.4194e-18	6.05574e-16
Nudt19	18924.5	24063.7	22512	18221.7	5795.84	5039.34	7750.57	9213.64	20930.5	6949.85	3.01164	12540.3	-1.59077	0.185123	-8.59301	8.47172e-18	6.92125e-16
Wwp1	10888	11196.3	10681.3	10122.5	4665.68	4425.06	4858.28	6174.71	10722	5030.93	2.13122	7837.93	-1.09165	0.127272	-8.57728	9.71449e-18	6.93652e-16
Gpr85	21.6403	23.9457	27.8594	7.45211	85.6624	108.261	118.579	122.664	20.2244	108.791	0.185901	62.3074	2.37951	0.277441	8.57665	9.76794e-18	1.02357e-15
Slitrk6	333.458	523.385	395.604	407.382	137.255	115.478	147.794	132.809	414.957	133.334	3.11217	258.184	-1.64564	0.192892	-8.53138	1.44611e-17	1.03301e-15
Csad	9790.29	10159	9716.56	8584.83	4400.91	3913.43	4626.28	4443.58	9562.66	4346.05	2.20031	6379.08	-1.1381	0.133424	-8.52994	1.46421e-17	1.04351e-15
Prom1	3092.6	3460.16	3060.55	2867.82	7260.86	7899.04	7589.02	9802.06	3120.28	8137.75	0.383433	5782.22	1.38291	0.162153	8.5284	1.48392e-17	1.14491e-15
Hpd	1342.69	1260.57	1392.17	1649.4	4274.36	3165.23	5724.42	3308.24	1411.21	4118.06	0.342687	3372.76	1.54457	0.181442	8.51274	1.69869e-17	1.24473e-15
Pla2g5	192.796	236.036	191.832	176.367	431.232	380.116	414.166	420.563	199.258	411.519	0.4842	315.239	1.04005	0.122261	8.50685	1.7873e-17	1.27994e-15
Tm6sf2	59.0191	59.0091	80.3943	72.0371	152.829	196.473	190.757	242.561	67.6149	195.655	0.345582	133.079	1.53413	0.180417	8.50324	1.84376e-17	1.41564e-15
Mettl7a3	24.5913	22.2353	19.1036	62.1009	165.484	237.372	132.327	206.592	32.0078	185.444	0.172601	96.386	2.58064	0.303921	8.49116	2.04578e-17	1.4905e-15
Nwd2	61.9701	63.2851	39.7992	64.585	2.92031	4.8116	3.43706	8.30058	57.4098	4.86739	11.7948	26.8003	-3.50186	0.412721	-8.4848	2.16085e-17	1.5571e-15
Tmem178	1415.48	1450.43	1487.69	1212.21	554.859	568.57	750.997	765.498	1391.45	659.981	2.10832	980.354	-1.08087	0.127471	-8.47935	2.26458e-17	1.84836e-15
Proc	6026.84	5410.88	5832.96	4333.4	1658.74	1465.93	2084.58	1575.27	5401.02	1696.13	3.18432	3291.24	-1.67221	0.197997	-8.44564	3.02379e-17	2.09815e-15
Acsl1	7730.52	8239.03	8165.99	6662.19	14278.4	14586.4	18766.3	17308.6	7699.43	16234.9	0.474252	11423	1.07592	0.127427	8.44347	3.08052e-17	2.10651e-15
Snx31	505.597	596.077	421.871	470.725	206.368	170.812	247.468	225.96	498.568	212.652	2.34452	349.899	-1.24063	0.1472	-8.42821	3.50982e-17	2.4506e-15
Hunk	597.077	533.647	454.506	608.589	257.961	253.411	281.839	266.541	548.455	264.938	2.07013	412.183	-1.05094	0.124752	-8.42421	3.63195e-17	2.51177e-15
Dnaja4	1315.14	1356.35	1315.76	861.961	599.637	570.976	582.581	583.807	1212.3	584.25	2.07497	831.002	-1.05532	0.12532	-8.42096	3.7342e-17	2.88762e-15
Slc22a6	29925.6	29697	30794.2	26081.1	8095.1	7903.05	11448.8	8884.39	29124.5	9082.84	3.20654	17829.3	-1.68125	0.200048	-8.40424	4.3063e-17	3.80689e-15
Slc6a4	151.482	153.082	150.441	161.462	335.836	281.478	378.076	372.604	154.117	341.999	0.450636	250.339	1.14555	0.136841	8.37138	5.69478e-17	5.0421e-15
Gm39133	75.7412	67.5611	75.6184	78.2472	11.6812	12.8309	13.7482	8.30058	74.292	11.6402	6.38234	45.5807	-2.69374	0.323443	-8.32832	8.19963e-17	5.62479e-15
Nat2	514.45	690.15	505.449	657.028	215.129	192.464	228.564	239.794	591.769	218.988	2.70229	400.299	-1.43599	0.172645	-8.31757	8.97855e-17	6.97525e-15
LOC328448	1102.67	1118.61	853.294	1538.86	436.099	315.16	195.912	228.727	1153.36	293.975	3.92333	738.397	-1.96592	0.237111	-8.29115	1.12159e-16	7.78193e-15
Gm26697	156.401	168.475	153.625	171.399	65.2202	40.8986	70.4597	61.7932	162.475	59.5929	2.72641	109.412	-1.47409	0.178183	-8.27287	1.30772e-16	1.00947e-14
Nupr1	362.968	288.204	294.514	242.194	557.779	574.184	766.464	657.59	296.97	639.004	0.464738	498.92	1.09727	0.132963	8.25243	1.55203e-16	1.0229e-14
Rdh19	3.93461	7.69684	3.97992	4.96807	46.7249	76.1836	41.2447	76.5498	5.14486	60.1758	0.0854972	32.8811	3.5579	0.431234	8.2505	1.57739e-16	1.36502e-14
D430019H16Rik	109.185	101.769	109.05	75.7631	271.589	230.155	268.091	196.447	98.9419	241.57	0.409578	172.801	1.26993	0.154576	8.21559	2.11127e-16	1.57937e-14
Frzb	1006.28	1114.33	936.872	921.578	361.145	233.362	436.506	329.256	994.764	340.067	2.9252	711.975	-1.55655	0.190123	-8.18703	2.67749e-16	1.75777e-14
D630029K05Rik	2380.44	2343.26	1964.49	2274.14	987.064	745.797	1108.45	1020.97	2240.58	965.571	2.32047	1677.75	-1.21676	0.148674	-8.18412	2.7431e-16	1.79485e-14
Car9	423.954	323.267	335.905	473.209	156.723	115.478	147.794	141.11	389.084	140.276	2.7737	253.087	-1.47372	0.180134	-8.18125	2.80924e-16	1.81397e-14
Tet1	188.861	215.511	189.444	290.632	470.17	431.44	422.758	450.998	221.112	443.841	0.498178	355.344	1.01796	0.124451	8.17961	2.84755e-16	1.8881e-14
Naaladl2	597.077	632.851	411.523	598.653	245.306	205.295	259.498	270.23	560.026	245.082	2.28505	385.688	-1.19487	0.146171	-8.17443	2.97262e-16	2.04284e-14
Dusp4	457.398	456.679	604.151	501.776	178.139	182.039	237.157	174.312	505.001	192.912	2.61778	336.989	-1.39989	0.171459	-8.16457	3.22569e-16	2.04983e-14
Asxl3	272.472	307.018	253.123	475.693	111.945	108.261	73.8968	90.3841	327.076	96.1217	3.40273	204.285	-1.74863	0.214193	-8.16381	3.24619e-16	2.47575e-14
Hmox1	1039.72	1002.3	1085.72	712.919	429.285	472.338	390.106	353.236	960.165	411.241	2.3348	596.189	-1.22286	0.150217	-8.14063	3.93212e-16	2.71556e-14
4930502E18Rik	45.248	82.0996	67.6586	39.7446	5.84062	4.8116	3.43706	6.45601	58.6877	5.13632	11.426	29.761	-3.48141	0.428587	-8.12301	4.54768e-16	3.05153e-14
Gm39552	56.0682	82.0996	62.8827	178.851	3.89375	0.801933	0	0	94.9753	1.17392	80.9044	45.7195	-6.22602	0.76732	-8.11398	4.89878e-16	3.05153e-14
Rnf180	157.384	186.434	124.173	157.736	46.7249	38.4928	42.9632	35.9692	156.432	41.0375	3.81193	123.178	-1.93624	0.23875	-8.1099	5.06608e-16	3.30671e-14
Ccdc180	26.5586	43.6154	42.1871	23.5984	105.131	129.111	113.423	131.887	33.9899	119.888	0.283513	75.0131	1.79485	0.222054	8.08296	6.32155e-16	3.88973e-14
Nup62cl	3.93461	5.13122	2.38795	2.48404	49.6453	29.6715	60.1485	119.897	3.48445	64.8406	0.0537388	32.9007	4.20242	0.518598	8.10342	5.3435e-16	3.88973e-14
Igf2os	0.983652	0.855204	2.38795	1.24202	49.6453	44.9082	84.2079	69.1715	1.36721	61.9832	0.0220577	26.289	5.4456	0.673706	8.08306	6.3161e-16	4.09538e-14
Phyh	18453.3	20661.7	17408.1	14679.4	8702.52	7531.75	9654.7	9667.41	17800.7	8889.09	2.00253	13083.8	-1.00214	0.124084	-8.07633	6.67468e-16	4.20072e-14
Kcnk2	37.3788	38.4842	38.2072	42.2286	93.4499	104.251	125.453	107.908	39.0747	107.765	0.362591	81.6213	1.45412	0.180237	8.06781	7.15684e-16	4.72497e-14
Cyp4a12b	133.777	110.321	109.846	206.175	25.3093	27.2657	20.6223	12.912	140.03	21.5274	6.50473	61.1546	-2.68867	0.335138	-8.02257	1.03555e-15	6.33319e-14
Acot7	511.499	411.353	439.383	327.893	1098.04	1105.06	1213.28	1902.68	422.532	1329.76	0.317749	867.723	1.65318	0.206154	8.01911	1.06511e-15	6.44453e-14
Ifitm1	92.4633	83.81	99.4979	89.4253	181.059	179.633	206.223	227.805	91.2991	198.68	0.459528	155.884	1.11569	0.139353	8.00618	1.1833e-15	7.87625e-14
Gypc	59.0191	94.0724	96.3139	63.3429	180.086	192.464	232.001	207.514	78.1871	203.016	0.385127	150.789	1.35171	0.169133	7.99203	1.32732e-15	8.78636e-14
Slc51a	2354.86	2803.36	2344.97	1613.38	874.146	827.594	1106.73	1017.28	2279.14	956.439	2.38295	1525.06	-1.2556	0.157379	-7.97821	1.48475e-15	9.55128e-14
Ror2	59.0191	57.2987	85.9662	74.5211	239.465	250.203	360.891	237.028	69.2013	271.897	0.254513	157.77	1.96732	0.246916	7.96756	1.61841e-15	9.94253e-14
Akr1c20	8.85287	5.98643	10.3478	8.69413	43.8046	75.3817	58.43	83.0058	8.4703	65.1555	0.130001	37.7324	2.95076	0.370593	7.96226	1.6893e-15	1.02621e-13
Rrh	11.8038	10.2624	23.0835	23.5984	76.9015	89.0145	85.9265	87.6172	17.187	84.8649	0.202522	49.129	2.31755	0.291696	7.9451	1.94034e-15	1.21675e-13
Gm15638	552.812	677.322	608.131	616.041	280.35	235.768	266.372	310.811	613.577	273.325	2.24486	442.463	-1.16697	0.14705	-7.9359	2.08981e-15	1.29005e-13
Mcoln2	68.8556	54.7331	97.9059	57.1329	225.837	193.266	261.216	365.225	69.6569	261.386	0.26649	159.121	1.89911	0.239678	7.9236	2.30733e-15	1.48065e-13
5730420D15Rik	2.95096	5.13122	3.18393	2.48404	46.7249	38.4928	48.1188	32.28	3.43754	41.4041	0.083024	22.9807	3.54033	0.447677	7.90823	2.61072e-15	1.60405e-13
Itih2	465.267	438.72	343.865	383.784	116.812	44.9082	123.734	154.944	407.909	110.1	3.7049	282.351	-1.89894	0.240376	-7.89987	2.79203e-15	1.74965e-13
Gm34996	54.1009	86.3756	58.9027	85.6993	13.6281	11.2271	20.6223	13.8343	71.2696	14.828	4.80644	38.4256	-2.32137	0.294265	-7.8887	3.05354e-15	1.7574e-13
Acat1	29362	31943.6	27408.9	22957.5	11902.2	11247.9	14126.3	14954.9	27918	13057.8	2.13803	20179.9	-1.09644	0.139004	-7.88782	3.07518e-15	1.88843e-13
2310015A16Rik	41.3134	47.0362	38.2072	43.4707	139.201	120.29	221.69	180.768	42.5069	165.487	0.256859	101.842	1.9501	0.247522	7.87851	3.31319e-15	1.99522e-13
Cyp2c44	343.295	396.815	433.811	689.32	1239.18	1362.48	1129.07	1100.29	465.81	1207.76	0.385682	892.37	1.37916	0.175214	7.8713	3.50975e-15	2.01074e-13
Gm38967	109.185	118.873	93.926	120.476	241.412	243.788	247.468	258.24	110.615	247.727	0.44652	176.114	1.1689	0.148526	7.87	3.54634e-15	2.08987e-13
Serpina1b	122.957	123.149	187.852	180.093	28.2297	10.4251	6.87412	24.9017	153.513	17.6077	8.71852	88.8602	-3.08602	0.392381	-7.86484	3.69556e-15	2.39458e-13
Cyp2a4	12463.9	12475.7	11526.6	10570.8	4134.18	2441.88	5019.82	5011.7	11759.3	4151.9	2.83226	7684.34	-1.50251	0.191464	-7.84746	4.24543e-15	2.45642e-13
Neurog2	146.564	132.557	120.193	86.9413	1.94687	0	0	0	121.564	0.486718	249.762	49.7161	-7.86511	1.0027	-7.84394	4.36641e-15	2.58836e-13
Igfbp1	142.63	140.253	145.665	136.622	437.073	422.618	730.375	517.403	141.292	526.867	0.268175	349.885	1.89411	0.241806	7.8332	4.75619e-15	2.92893e-13
Gm36488	56.0682	59.0091	54.9228	144.074	3.89375	0	0	0	78.5186	0.973436	80.6612	44.7153	-6.25972	0.801485	-7.81015	5.71201e-15	3.32993e-13
Henmt1	40.3297	41.905	61.2907	72.0371	3.89375	4.8116	1.71853	7.37829	53.8906	4.45054	12.1088	27.0941	-3.49761	0.448217	-7.80339	6.02675e-15	3.39566e-13
Igf2bp1	255.75	286.493	238.795	219.837	109.998	110.667	65.3041	70.0938	250.219	89.0157	2.81095	146.078	-1.47152	0.188643	-7.8006	6.16138e-15	3.59305e-13
Mettl7a2	1659.42	1670.21	1701.81	1311.57	676.538	557.343	795.679	750.741	1585.75	695.075	2.28141	1055.46	-1.19365	0.153356	-7.7835	7.05474e-15	4.09722e-13
Cdr2	3181.13	2856.38	2053.64	2852.92	1437.77	1350.45	1249.37	1322.56	2736.02	1340.04	2.04175	1828.93	-1.0286	0.13228	-7.7759	7.49111e-15	4.73586e-13
LOC108168993	58.0355	45.3258	32.6353	70.7951	3.89375	0.801933	0	0.922286	51.6979	1.40449	36.809	32.9595	-5.07508	0.656197	-7.73408	1.04151e-14	6.10383e-13
Gm11827	52.1336	59.8643	52.5349	70.7951	16.5484	5.61353	3.43706	6.45601	58.8319	8.01375	7.34137	36.5177	-2.81621	0.364605	-7.72401	1.12726e-14	6.6899e-13
Ogdhl	348.213	310.439	360.58	252.13	653.176	817.971	665.071	621.621	317.84	689.46	0.460999	456.151	1.11459	0.144873	7.69357	1.43084e-14	7.79937e-13
Igfals	290.177	254.851	323.169	178.851	760.254	805.942	953.784	839.281	261.762	839.815	0.31169	508.124	1.67724	0.218234	7.68554	1.52357e-14	9.18481e-13
2310007B03Rik	71.8066	69.2715	58.1068	62.1009	198.581	204.493	206.223	163.245	65.3215	193.136	0.338216	113.912	1.56192	0.204137	7.65131	1.98948e-14	1.12609e-12
Akr1c19	539.041	583.249	526.941	685.594	1208.03	1263.85	1405.76	1444.3	583.706	1330.48	0.438717	931.637	1.18973	0.155825	7.63502	2.25784e-14	1.19456e-12
ATP6	59.0191	47.0362	42.9831	14.9042	192.74	165.198	429.632	285.909	40.9857	268.37	0.152721	216.714	2.69254	0.3538	7.61033	2.73402e-14	1.641e-12
Fam25c	38.3624	57.2987	61.2907	27.3244	191.767	157.179	281.839	288.676	46.069	229.865	0.200418	132.209	2.29927	0.302882	7.59131	3.16699e-14	1.78535e-12
Apln	204.6	272.81	210.14	193.755	461.409	504.416	486.344	720.306	220.326	543.118	0.405668	385.805	1.3007	0.171595	7.58006	3.45382e-14	1.9187e-12
Dcst1	201.649	165.91	178.3	150.284	52.5656	55.3333	53.2744	76.5498	174.036	59.4308	2.92838	126.046	-1.54332	0.203863	-7.5704	3.72064e-14	2.03181e-12
Ctxn3	178.041	314.715	163.177	57.1329	13.6281	16.8406	15.4668	24.9017	178.266	17.7093	10.0663	92.5585	-3.32566	0.439748	-7.56265	3.94935e-14	2.0339e-12
Nlrc4	288.21	313.86	325.557	268.276	83.7155	56.1353	108.267	142.032	298.976	97.5376	3.06524	206.563	-1.62735	0.215195	-7.56221	3.96281e-14	2.57223e-12
Gm42192	2.95096	1.71041	2.38795	2.48404	35.0437	28.8696	39.5262	89.4618	2.38334	48.2253	0.0494209	23.9554	4.35806	0.578659	7.53131	5.02356e-14	3.10518e-12
Gsap	681.671	850.928	645.542	709.193	306.632	268.647	345.424	351.391	721.833	318.024	2.26975	544.773	-1.18646	0.15806	-7.50637	6.07875e-14	3.11975e-12
Aldh1a2	142.63	98.3485	136.909	96.8775	312.473	299.121	371.202	300.665	118.691	320.865	0.369909	229.83	1.42613	0.190445	7.48843	6.97011e-14	3.67576e-12
Sec11a	2939.15	3118.07	2662.56	2148.69	1235.29	1129.12	1345.61	1561.43	2717.12	1317.86	2.06176	1853.48	-1.04482	0.139619	-7.48332	7.24665e-14	3.92725e-12
Nr1h4	5000.89	5390.35	4931.91	3624.21	2002.36	2099.46	2500.46	2252.22	4736.84	2213.63	2.13986	3297.4	-1.09864	0.146989	-7.47432	7.76057e-14	4.05788e-12
Dnah9	71.8066	71.8371	57.3108	45.9547	11.6812	10.4251	22.3409	11.0674	61.7273	13.8787	4.44764	33.8942	-2.25447	0.302029	-7.4644	8.36776e-14	4.59946e-12
Gusb	2775.87	3380.62	2233.53	1499.12	933.525	901.372	931.443	1028.35	2472.28	948.672	2.60604	1709.62	-1.38234	0.185661	-7.44552	9.65611e-14	4.95213e-12
Slc14a1	99.3489	90.6516	86.7621	91.9094	209.289	186.85	218.253	260.085	92.168	218.619	0.421591	163.536	1.24676	0.167887	7.42616	1.11792e-13	6.03825e-12
B4galt5	6805.89	6159.18	6680.69	4740.79	2414.12	2203.71	2967.9	2842.49	6096.63	2607.05	2.33851	4032.65	-1.22642	0.165388	-7.41538	1.21272e-13	6.35538e-12
Car5a	39.3461	38.4842	48.555	38.5026	120.706	121.894	183.883	142.954	41.222	142.359	0.289563	88.3098	1.76985	0.238901	7.40829	1.27935e-13	6.99679e-12
Socs2	437.725	454.113	335.109	276.97	742.732	846.039	955.502	946.266	375.979	872.635	0.430855	570.583	1.21095	0.163748	7.39522	1.4117e-13	7.58479e-12
Dnajb1	1441.05	1908.82	2192.93	1563.7	947.154	1010.44	793.96	781.177	1776.63	883.181	2.01162	1107.94	-1.00727	0.136409	-7.38419	1.53384e-13	7.79528e-12
Lgals12	33.4442	17.1041	38.2072	32.2925	73.0077	139.536	96.2376	147.566	30.262	114.087	0.265254	80.2668	1.92723	0.261134	7.38024	1.58e-13	8.19269e-12
Fgl1	37.3788	36.7738	31.0433	28.5664	77.8749	114.676	127.171	201.981	33.4406	130.426	0.256395	76.6356	1.96026	0.266581	7.35334	1.93315e-13	9.82475e-12
Ly6f	14.7548	15.3937	15.9197	13.6622	81.7686	64.1546	103.112	327.412	14.9326	144.112	0.103618	75.4215	3.26929	0.444912	7.34816	2.0095e-13	9.83745e-12
Ttbk1	379.69	313.86	374.908	577.539	138.228	119.488	75.6153	93.1509	411.499	106.621	3.85947	265.616	-1.93595	0.263478	-7.34769	2.01663e-13	1.00775e-11
Slc22a27	10.8202	4.27602	1.59197	2.48404	43.8046	70.5701	36.0891	91.3064	4.79305	60.4425	0.0792993	31.0873	3.68071	0.502167	7.32966	2.30737e-13	1.13227e-11
Dio1	567.567	838.1	522.165	291.874	1781.39	1384.14	2395.63	2427.46	554.927	1997.15	0.277859	1147.07	1.84516	0.252004	7.32194	2.44409e-13	1.27599e-11
Slc7a13	28702	33378.6	28963.4	21695.6	1147.68	23.256	48.1188	78.3944	28184.9	324.363	86.8932	13728.7	-6.44051	0.880895	-7.31133	2.64517e-13	1.30174e-11
Gm6135	16.7221	17.9593	17.5116	11.1782	61.3265	49.7198	109.986	89.4618	15.8428	77.6235	0.204098	49.1304	2.24854	0.307667	7.30834	2.70457e-13	1.30843e-11
Fst	64.921	102.624	120.193	115.508	256.014	251.005	245.75	281.297	100.812	258.516	0.389962	202.143	1.35962	0.186206	7.30173	2.84093e-13	1.42703e-11
Scd1	10133.6	7391.53	17324.6	11896.1	36394.8	44895.4	50160.4	40748.5	11686.4	43049.8	0.271463	27902.8	1.88114	0.257874	7.29479	2.99124e-13	1.47e-11
Tmprss9	97.3816	83.81	183.076	99.3615	13.6281	13.6329	10.3112	17.5234	115.907	13.7739	8.415	77.6858	-3.054	0.419449	-7.28098	3.31405e-13	1.72189e-11
Enox1	65.9047	53.8778	50.1469	68.311	146.015	157.981	137.482	152.177	59.5601	148.414	0.401311	97.7299	1.33546	0.183739	7.26827	3.64109e-13	1.76573e-11
Mcm10	277.39	249.72	217.303	176.367	119.733	98.6377	99.6747	109.752	230.195	106.949	2.15237	164.984	-1.10671	0.152343	-7.26458	3.74196e-13	1.78925e-11
Galnt12	41.3134	55.5883	63.6786	49.6807	123.626	118.686	134.045	135.576	52.5653	127.983	0.410719	88.8804	1.2666	0.174403	7.2625	3.80005e-13	1.90681e-11
Gm40663	2.95096	0.855204	3.18393	4.96807	33.0968	29.6715	37.8076	47.9589	2.98954	37.1337	0.0805075	22.0021	3.70056	0.510169	7.25359	4.05853e-13	1.93791e-11
Adh7	166.237	135.977	136.113	231.015	25.3093	16.8406	37.8076	29.5132	167.336	27.3677	6.11436	103.483	-2.63906	0.364594	-7.23835	4.54169e-13	2.23379e-11
Gm12354	35.4115	59.0091	27.8594	75.7631	1.94687	0.801933	0	1.84457	49.5108	1.14834	43.1149	23.514	-5.28235	0.730547	-7.23067	4.80607e-13	2.34681e-11
Plekhf1	454.447	363.462	378.888	452.095	219.997	194.87	213.098	169.701	412.223	199.416	2.06715	283.826	-1.0499	0.145342	-7.22368	5.06006e-13	2.56165e-11
D330045A20Rik	23.6077	39.3394	39.7992	36.0185	122.653	90.6184	111.704	207.514	34.6912	133.123	0.260596	91.1063	1.93898	0.269239	7.20171	5.94602e-13	2.84516e-11
Ugt2b34	1339.73	1707.84	1530.68	1101.67	2901.81	3076.21	3110.54	3891.13	1419.98	3244.92	0.437601	2393.44	1.19151	0.165713	7.19022	6.46886e-13	3.0589e-11
Gm10845	76.7249	86.3756	109.846	49.6807	20.4422	24.058	24.0594	17.5234	80.6567	21.5207	3.74786	58.0933	-1.93127	0.269185	-7.17452	7.25592e-13	3.36669e-11
Gm41469	40.3297	29.9321	35.8192	60.8589	2.92031	3.20773	10.3112	1.84457	41.735	4.57095	9.13049	23.2708	-3.3938	0.473287	-7.17071	7.46116e-13	3.63747e-11
Gm28818	0	0	0	0	38.9375	32.8792	42.9632	23.0572	0	34.4593	0	19.0663	7.59559	1.06086	7.15982	8.07804e-13	3.66612e-11
Scgb1c1	4.91826	5.98643	3.18393	4.96807	33.0968	32.0773	37.8076	55.3372	4.76417	39.5797	0.120369	19.7119	3.06848	0.42865	7.15846	8.1586e-13	3.72015e-11
Gm40112	50.1663	53.0226	36.6152	32.2925	4.86718	4.8116	10.3112	2.76686	43.0242	5.6892	7.56242	23.0525	-3.05831	0.427367	-7.15617	8.29601e-13	3.75119e-11
9030619P08Rik	330.507	543.054	442.567	201.207	1164.23	980.764	1259.68	1835.35	379.334	1310.01	0.289566	860.83	1.78483	0.24946	7.15475	8.38255e-13	3.91283e-11
Syt12	285.259	308.729	295.31	240.952	160.617	145.15	115.141	134.654	282.562	138.891	2.03442	211.13	-1.0151	0.142282	-7.13442	9.71942e-13	4.35214e-11
Col6a6	124.924	140.253	93.926	84.4573	29.2031	41.7005	17.1853	24.9017	110.89	28.2477	3.92564	80.6938	-1.92945	0.270499	-7.13292	9.82592e-13	4.89915e-11
Aifm3	758.396	691.86	737.08	814.764	348.49	303.131	254.342	217.66	750.525	280.906	2.6718	486.456	-1.41508	0.198901	-7.1145	1.1232e-12	5.09376e-11
Gm4450	682.655	685.018	724.345	522.89	1130.16	1722.55	1453.88	1636.14	653.727	1485.68	0.440018	953.691	1.18323	0.166409	7.1104	1.15709e-12	5.14348e-11
Gm40145	140.662	172.751	114.622	480.661	28.2297	11.2271	5.15559	9.22286	227.174	13.4588	16.8792	124.161	-4.04743	0.569709	-7.10437	1.20868e-12	5.28866e-11
Igf1	374.771	358.33	362.172	321.683	707.688	690.464	917.695	908.452	354.239	806.075	0.439462	649.772	1.18306	0.166525	7.10439	1.20859e-12	5.58637e-11
Mpzl2	330.507	313.005	308.841	459.547	660.963	776.271	830.05	923.209	352.975	797.623	0.442534	562.356	1.17998	0.166427	7.0901	1.34019e-12	5.90156e-11
Gm41308	93.4469	91.5068	65.2706	109.298	24.3359	24.058	6.87412	18.4457	89.8805	18.4284	4.87727	59.0268	-2.21155	0.311997	-7.08838	1.35693e-12	5.90331e-11
Sox2ot	34.4278	53.0226	33.4313	31.0505	2.92031	0.801933	0	1.84457	37.9831	1.3917	27.2925	20.3298	-4.65332	0.656501	-7.08806	1.36006e-12	5.98035e-11
Sypl2	1466.63	1448.72	1407.3	1815.83	834.235	934.251	573.989	637.3	1534.62	744.944	2.06004	1025.58	-1.03721	0.1464	-7.08475	1.39296e-12	6.07473e-11
Mpped1	253.782	267.679	289.738	326.651	12.6547	0	0	0	284.462	3.16367	89.9154	143.978	-6.4465	0.912159	-7.0673	1.57977e-12	7.10845e-11
Eri2	362.968	377.145	358.192	320.441	151.856	165.198	173.571	154.022	354.686	161.162	2.20081	296.669	-1.14354	0.162594	-7.03308	2.02019e-12	8.60665e-11
E330021D16Rik	0	0	0	1.24202	51.5921	52.1256	46.4003	42.4252	0.310505	48.1358	0.0064506	21.28	7.38028	1.05023	7.02731	2.10547e-12	8.95118e-11
Tbx10	88.5287	100.914	70.0465	53.4068	14.6015	14.4348	22.3409	12.912	78.224	16.0723	4.86701	49.442	-2.33451	0.332225	-7.02689	2.11185e-12	9.15445e-11
Slc22a19	2431.59	2559.63	2092.64	1797.2	4701.7	4615.12	5684.89	8865.94	2220.26	5966.91	0.372096	4002.33	1.42605	0.203841	6.99591	2.63543e-12	1.16514e-10
Nudt8	1130.22	1044.2	1057.07	873.139	416.631	418.609	522.433	404.884	1026.16	440.639	2.32879	670.582	-1.22412	0.175159	-6.98863	2.7758e-12	1.19783e-10
Zfp937	322.638	373.724	353.416	289.39	118.759	157.981	137.482	178.001	334.792	148.056	2.26126	244.955	-1.17382	0.168061	-6.98448	2.85922e-12	1.23602e-10
Ano9	107.218	125.715	131.337	95.6354	236.545	223.739	261.216	303.432	114.976	256.233	0.448718	182.531	1.1457	0.164618	6.95971	3.40966e-12	1.42461e-10
Apela	503.63	553.317	428.239	402.414	971.489	924.628	1302.65	1348.38	471.9	1136.79	0.415117	810.248	1.2661	0.182219	6.94824	3.69863e-12	1.69682e-10
Gm10384	60.9864	42.7602	47.759	40.9866	8.76093	4.8116	6.87412	7.37829	48.1231	6.95623	6.91798	22.8261	-2.80504	0.404531	-6.93405	4.08947e-12	1.7261e-10
AA536875	66.8883	51.3122	61.2907	36.0185	1.94687	0.801933	0	0	53.8775	0.687201	78.4013	28.0385	-6.15353	0.88798	-6.92981	4.21405e-12	1.73786e-10
Npm3	415.101	511.412	625.643	373.848	191.767	185.246	240.594	221.349	481.501	209.739	2.29571	343.952	-1.20895	0.174462	-6.92959	4.22049e-12	1.76928e-10
Cyp4f14	66.8883	68.4163	74.8224	48.4387	140.175	169.208	140.919	189.069	64.6414	159.843	0.404407	116.545	1.29961	0.18763	6.92644	4.31549e-12	1.81704e-10
Fuca2	20796.4	22349	19351.9	12219	7760.23	6794.77	8551.4	9853.71	18679.1	8240.03	2.26687	13070.9	-1.18086	0.171115	-6.90099	5.16413e-12	2.16389e-10
Mme	4755.96	5038.86	4744.06	5420.17	8822.25	9269.54	10764.9	12279.3	4989.76	10284	0.485197	7441.37	1.04339	0.151343	6.89423	5.41585e-12	2.22596e-10
Camk1g	60.9864	74.4027	57.3108	64.585	169.378	184.444	115.141	161.4	64.3212	157.591	0.408153	122.796	1.30882	0.190135	6.88361	5.83533e-12	2.3643e-10
1700034H15Rik	21.6403	21.3801	18.3076	34.7765	85.6624	69.7681	68.7412	82.0835	24.0261	76.5638	0.313806	47.4912	1.7116	0.249147	6.86982	6.42825e-12	2.58963e-10
Gm6614	19.673	35.9186	43.7791	43.4707	3.89375	3.20773	3.43706	2.76686	35.7103	3.32635	10.7356	23.2448	-3.43344	0.501863	-6.8414	7.84254e-12	3.4571e-10
Gm8883	0	0	0	0	18.4953	36.8889	44.6818	21.2126	0	30.3196	0	13.5539	7.40755	1.08511	6.82653	8.69902e-12	3.54176e-10
Ugt2a3	81.6431	68.4163	55.7188	70.7951	16.5484	24.8599	15.4668	23.0572	69.1433	19.9831	3.4601	41.2718	-1.74614	0.255995	-6.82099	9.04149e-12	4.06656e-10
Tspan13	655.112	771.394	719.569	468.241	261.854	287.092	348.861	342.168	653.579	309.994	2.10836	473.84	-1.08321	0.159331	-6.79848	1.05732e-11	4.25217e-10
Slc17a3	22739.1	26207.7	24281.5	17620.5	8322.88	9070.66	9737.19	13648.9	22712.2	10194.9	2.2278	16199.3	-1.15563	0.170072	-6.79492	1.0837e-11	4.30165e-10
Pigr	6346.52	4731.84	5130.11	6287.1	1548.74	1201.3	2039.89	1350.23	5623.89	1535.04	3.66368	4075.3	-1.87416	0.275937	-6.79197	1.10614e-11	4.32549e-10
Gdpd2	8.85287	4.27602	4.7759	4.96807	36.0171	33.6812	39.5262	40.5806	5.71822	37.4513	0.152684	19.2108	2.7175	0.400122	6.79168	1.10838e-11	4.47198e-10
Mmd	603.962	726.068	777.675	469.483	1179.8	1344.84	1257.96	1490.41	644.297	1318.26	0.48875	978.076	1.03029	0.151813	6.78661	1.14799e-11	4.5986e-10
Tlcd2	244.929	261.692	266.654	155.252	95.3968	83.401	85.9265	112.519	232.132	94.3108	2.46135	161.31	-1.30108	0.192212	-6.769	1.29673e-11	5.34007e-10
Gcm1	55.0845	77.8236	62.0867	57.1329	121.68	133.121	168.416	181.69	63.0319	151.227	0.416804	98.5183	1.24763	0.184563	6.75992	1.38069e-11	5.73077e-10
2810459M11Rik	50.1663	55.5883	39.0032	60.8589	6.81405	5.61353	12.0297	11.0674	51.4041	8.88118	5.78799	29.5143	-2.58446	0.382962	-6.74862	1.49257e-11	5.80366e-10
Apcdd1	68.8556	90.6516	94.722	86.9413	154.776	182.039	195.912	154.022	85.2926	171.687	0.496791	133.506	0.994922	0.147559	6.74256	1.55621e-11	6.15901e-10
Pzp	5225.16	5973.6	4070.66	5268.64	196.634	9.62319	15.4668	22.1349	5134.51	60.9647	84.2211	2377.88	-6.39358	0.94893	-6.73767	1.60949e-11	6.81034e-10
B930092H01Rik	39.3461	39.3394	37.4112	31.0505	7.78749	0	0	0	36.7868	1.94687	18.8953	17.3727	-4.18035	0.622044	-6.72035	1.81286e-11	6.8925e-10
Slc5a6	988.57	986.05	994.979	922.82	1619.8	1591.84	2134.41	2513.23	973.105	1964.82	0.495264	1414.79	1.01271	0.150695	6.72027	1.8139e-11	6.94275e-10
Slc4a11	262.635	237.747	239.591	326.651	529.549	486.773	737.249	569.973	266.656	580.886	0.45905	436.941	1.12228	0.167032	6.71895	1.83033e-11	7.01984e-10
P3h4	104.267	91.5068	101.886	108.056	214.156	188.454	290.431	217.66	101.429	227.675	0.445498	155.351	1.15597	0.172113	6.71634	1.86343e-11	7.11623e-10
Tsku	1204.97	842.376	767.328	1125.27	330.968	324.783	400.417	292.365	984.987	337.133	2.92165	569.623	-1.54913	0.231098	-6.70337	2.03661e-11	7.69124e-10
Slc17a1	19391.7	23552.3	20050.8	15720.2	8629.51	8171.69	9991.53	11358.9	19678.8	9537.9	2.06322	14031.4	-1.04504	0.156018	-6.69818	2.1103e-11	7.93984e-10
Spidr	402.314	421.616	331.129	314.231	711.582	852.454	709.753	888.162	367.322	790.488	0.464678	622.75	1.10604	0.165152	6.69708	2.12619e-11	8.02647e-10
Steap3	174.106	148.805	202.18	182.577	432.206	487.575	651.323	457.454	176.917	507.139	0.348853	313.798	1.5161	0.227172	6.67379	2.49287e-11	9.25094e-10
Ugt1a10	17.7057	19.6697	21.4915	33.5345	93.4499	58.5411	182.164	157.711	23.1004	122.967	0.187859	63.1026	2.41636	0.36214	6.67245	2.51572e-11	9.4969e-10
Cldn18	43.2807	59.8643	46.963	42.2286	3.89375	4.8116	3.43706	4.61143	48.0841	4.18846	11.4802	28.5025	-3.49387	0.524177	-6.66544	2.63876e-11	9.74956e-10
Cpe	2659.8	3125.77	2370.44	1167.5	721.316	692.87	683.975	747.974	2330.88	711.534	3.27585	1508.75	-1.71209	0.256983	-6.66226	2.6965e-11	1.02666e-09
Gm40105	0	0	0.795983	1.24202	46.7249	38.4928	48.1188	77.4721	0.5095	52.7021	0.00966755	31.8373	6.79727	1.02263	6.64683	2.99463e-11	1.12502e-09
Hbegf	527.238	680.742	824.638	478.177	325.128	279.874	281.839	359.692	627.699	311.633	2.01422	440.233	-1.01094	0.152212	-6.6417	3.10095e-11	1.15286e-09
Hsd3b2	4456.93	5028.6	4810.13	2928.68	1601.3	1967.94	1067.21	1471.05	4306.08	1526.87	2.82019	3057.84	-1.49471	0.22518	-6.63785	3.18302e-11	1.22964e-09
Hsd17b14	19.673	12.8281	17.5116	37.2606	91.503	138.734	108.267	63.6378	21.8183	100.536	0.217021	58.8907	2.23865	0.338145	6.6204	3.58224e-11	1.2965e-09
Gm41297	42.297	31.6425	25.4715	26.0824	2.92031	0.801933	3.43706	3.68915	31.3734	2.71211	11.5679	18.4586	-3.61419	0.546074	-6.61851	3.62847e-11	1.33609e-09
Ifrd2	1774.51	1742.05	1833.15	1669.27	760.254	763.44	1005.34	689.87	1754.75	804.726	2.18055	1147.64	-1.12798	0.170524	-6.61483	3.71976e-11	1.34541e-09
Lrrc3	714.131	562.724	647.93	781.23	370.879	351.246	216.535	218.582	676.504	289.311	2.33833	453.981	-1.21687	0.184535	-6.59423	4.27455e-11	1.5536e-09
Hist1h2bb	204.6	220.643	91.538	222.321	60.353	56.9372	58.43	65.4823	184.775	60.3006	3.06424	89.5636	-1.60948	0.244202	-6.59077	4.37553e-11	1.60383e-09
Gm30571	64.921	64.9955	85.9662	78.2472	179.112	167.604	206.223	213.97	73.5325	191.728	0.383526	127.205	1.37893	0.209724	6.57495	4.86689e-11	1.79717e-09
Ankrd45	38.3624	53.8778	58.9027	43.4707	133.361	113.072	85.9265	127.276	48.6534	114.909	0.423409	83.0033	1.24243	0.189194	6.56694	5.13594e-11	1.84654e-09
Hist1h2bc	6414.4	8363.89	2605.25	6567.79	1747.32	1485.18	2552.02	2152.62	5987.83	1984.28	3.01763	2971.18	-1.59413	0.242981	-6.56072	5.3548e-11	1.94654e-09
Arfgef3	260.668	265.968	235.611	413.592	578.221	631.923	738.968	749.819	293.96	674.733	0.435669	465.841	1.20309	0.183543	6.55479	5.57207e-11	1.99018e-09
Kap	508784	677519	533775	382744	167195	106991	177354	251275	525706	175704	2.992	353425	-1.58111	0.241346	-6.55124	5.70617e-11	1.99884e-09
Idi1	298.047	268.534	331.925	190.029	88.5827	99.4396	91.082	99.6069	272.134	94.6778	2.87431	188.562	-1.52384	0.232635	-6.55035	5.74025e-11	2.07745e-09
Ksr2	1007.26	713.24	736.284	1311.57	440.967	408.986	393.543	300.665	942.089	386.04	2.44039	607.657	-1.28565	0.196452	-6.54435	5.97559e-11	2.09204e-09
Nrep	247.88	279.652	256.307	196.239	496.453	465.121	1142.82	761.809	245.019	716.551	0.341943	505.025	1.54139	0.237342	6.49436	8.33858e-11	2.8764e-09
Rpp40	347.229	396.815	323.965	247.162	126.547	79.3913	156.386	145.721	328.793	127.011	2.58869	217.048	-1.38805	0.213749	-6.49385	8.36701e-11	3.12025e-09
4930434B07Rik	18.6894	19.6697	19.1036	27.3244	48.6718	88.2126	68.7412	82.0835	21.1968	71.9273	0.294697	45.7592	1.78783	0.275852	6.48111	9.10476e-11	3.23454e-09
Cfi	155.417	103.48	129.745	94.3934	219.997	289.498	264.653	272.075	120.759	261.556	0.461695	231.962	1.11099	0.171799	6.46677	1.00118e-10	3.51141e-09
5830411N06Rik	38.3624	36.7738	39.0032	34.7765	0.973436	0.801933	0	0.922286	37.229	0.674414	55.202	20.2812	-5.61643	0.869072	-6.46256	1.02948e-10	3.54011e-09
Gm34150	36.3951	36.7738	27.0634	38.5026	81.7686	68.9662	104.83	106.063	34.6837	90.407	0.38364	61.9668	1.37893	0.213577	6.45636	1.07252e-10	3.65604e-09
Serpina1d	949.224	963.815	1392.17	1066.89	246.279	217.324	494.936	424.252	1093.03	345.698	3.1618	814.994	-1.66688	0.258383	-6.4512	1.10965e-10	3.83498e-09
Akr1c14	10688.4	13602.9	9965.71	7853.28	2611.73	1711.32	3787.64	4513.67	10527.6	3156.09	3.33563	6418.25	-1.73834	0.269613	-6.44755	1.13674e-10	3.85619e-09
Cyp2b10	25.575	48.7466	37.4112	13.6622	0	0	0	0	31.3487	0	#DIV/0!	17.5113	-7.34691	1.14093	-6.43942	1.19933e-10	4.08826e-09
Crot	18277.2	21274.9	18411.1	12636.3	6356.54	5328.04	7556.37	9669.25	17649.9	7227.55	2.44203	12027.5	-1.28822	0.200123	-6.43714	1.21748e-10	4.15639e-09
Hmgcs2	587.24	583.249	637.582	817.248	1727.85	1716.94	2648.25	2162.76	656.33	2063.95	0.317997	1053.04	1.65297	0.256896	6.43439	1.23968e-10	4.20457e-09
0610006L08Rik	472.153	515.688	470.426	275.728	133.361	130.715	232.001	203.825	433.499	174.976	2.47748	304.198	-1.32462	0.206037	-6.42903	1.28422e-10	4.27921e-09
Igsf10	60.9864	89.7964	87.5581	86.9413	154.776	206.899	177.008	206.592	81.3206	186.319	0.436459	141.41	1.19836	0.186355	6.43053	1.27162e-10	4.27921e-09
Nt5dc2	453.464	490.032	533.309	433.464	211.236	187.652	244.031	174.312	477.567	204.308	2.33749	330.66	-1.23365	0.192007	-6.42502	1.31852e-10	4.39562e-09
Gm12927	1.9673	5.13122	5.57188	6.21009	27.2562	25.6618	34.3706	52.5703	4.72013	34.9647	0.134997	19.5562	2.89227	0.45083	6.41543	1.40427e-10	4.76908e-09
Tnn	443.627	420.76	435.403	432.222	817.686	756.222	1180.63	854.96	433.003	902.374	0.479849	663.707	1.05539	0.164613	6.41136	1.44224e-10	4.83204e-09
2010203P06Rik	20.6567	44.4706	27.0634	26.0824	73.9812	94.628	97.9562	90.3841	29.5683	89.2374	0.331344	61.8366	1.57577	0.24704	6.3786	1.7872e-10	6.08117e-09
Ido2	186.894	204.394	172.728	344.039	75.928	101.044	61.867	90.3841	227.014	82.3057	2.75818	161.923	-1.4398	0.226082	-6.3685	1.90886e-10	6.47359e-09
Aacs	9078.13	7013.53	9938.64	5351.86	2429.7	2532.5	3129.44	2279.89	7845.54	2592.88	3.0258	4473.47	-1.59778	0.251146	-6.36197	1.99185e-10	6.52247e-09
Trim46	51.1499	42.7602	80.3943	72.0371	172.298	202.889	164.979	152.177	61.5854	173.086	0.355808	109.309	1.49541	0.235396	6.35273	2.11523e-10	6.91783e-09
COX3	268.537	316.425	265.858	101.846	1095.12	1012.04	3057.26	2788.99	238.167	1988.35	0.119781	1363.64	3.05973	0.481897	6.34935	2.16231e-10	7.00567e-09
D030028A08Rik	62.9537	70.1267	58.9027	73.2791	141.148	111.469	147.794	137.421	66.3156	134.458	0.493207	102.827	1.01523	0.159909	6.34877	2.17037e-10	7.08611e-09
Comp	31.4769	12.8281	43.7791	21.1143	106.105	112.271	123.734	81.1612	27.2996	105.818	0.257987	57.778	1.9363	0.30565	6.33503	2.37296e-10	7.70486e-09
Car4	6564.89	6328.51	5959.52	3147.28	2336.25	2639.16	2656.85	2682.93	5500.05	2578.8	2.1328	3780.17	-1.09316	0.173219	-6.31084	2.77525e-10	9.05287e-09
Acot12	5923.55	7115.3	5914.15	5304.66	2485.18	1980.77	3187.87	3129.32	6064.42	2695.79	2.24959	4194.16	-1.17045	0.185582	-6.30692	2.84639e-10	9.12976e-09
Bc1	10.8202	5.13122	12.7357	9.93615	34.0703	41.7005	87.645	106.063	9.65582	67.3697	0.143326	35.2668	2.79425	0.443414	6.30168	2.94446e-10	9.40773e-09
Gm33742	0	0.855204	0	0	25.3093	40.0966	24.0594	29.5132	0.213801	29.7446	0.00718788	14.8673	6.70211	1.06813	6.27461	3.50501e-10	1.15709e-08
7530428D23Rik	29.5096	31.6425	30.2474	24.8404	5.84062	0	1.71853	0	29.06	1.88979	15.3774	22.4401	-4.02041	0.642209	-6.26028	3.84279e-10	1.25252e-08
Ptpn22	166.237	142.819	151.237	130.412	76.9015	47.314	63.5856	59.0263	147.676	61.7069	2.39319	121.393	-1.26977	0.20305	-6.25351	4.01334e-10	1.25252e-08
Ndrg4	156.401	109.466	141.685	157.736	293.004	282.28	335.113	298.821	141.322	302.305	0.467482	207.519	1.09791	0.175588	6.25275	4.03279e-10	1.2997e-08
Nek5	26.5586	23.0905	28.6554	29.8084	56.4593	65.7585	75.6153	100.529	27.0282	74.5906	0.362355	55.8477	1.46936	0.235231	6.24647	4.19825e-10	1.35688e-08
Mr1	162.303	178.738	173.524	129.17	255.04	317.565	350.58	375.371	160.934	324.639	0.495731	260.776	1.00337	0.160945	6.23423	4.54012e-10	1.45575e-08
Lipo2	44.2643	38.4842	27.0634	47.1967	0	0.801933	1.71853	0	39.2522	0.630115	62.2936	26.2933	-6.22262	0.999819	-6.22374	4.85433e-10	1.52036e-08
Hspa1a	220.338	382.276	596.987	450.853	141.148	146.754	178.727	173.39	412.614	160.005	2.57876	213.683	-1.37196	0.220538	-6.22096	4.94122e-10	1.53186e-08
Hsf2bp	316.736	358.33	418.687	270.76	159.644	135.527	166.697	196.447	341.128	164.579	2.07274	246.233	-1.05796	0.170102	-6.21954	4.98621e-10	1.55179e-08
Gdpd3	176.074	161.634	172.728	114.266	285.217	262.232	326.521	394.739	156.175	317.177	0.492392	226.939	1.01261	0.16287	6.21729	5.05823e-10	1.57325e-08
Cox6b2	65.9047	59.0091	47.759	37.2606	115.839	145.952	135.764	95.9178	52.4833	123.368	0.425421	82.1492	1.21863	0.196277	6.2087	5.34254e-10	1.66317e-08
Ggt1	42507.5	41037.8	44171.5	33314.7	17310.6	16824.5	21088.1	18591.5	40257.9	18453.7	2.18156	27549.4	-1.12546	0.181416	-6.20373	5.51419e-10	1.7023e-08
Pknox2	44.2643	47.8914	66.8626	79.4892	148.936	101.845	190.757	139.265	59.6269	145.201	0.410651	102.716	1.27598	0.206065	6.19209	5.93698e-10	1.95434e-08
Cblc	721.017	702.978	776.083	745.211	305.659	298.319	386.669	284.987	736.322	318.908	2.30888	489.628	-1.21225	0.196536	-6.16809	6.91216e-10	2.16569e-08
Gm26588	31.4769	29.9321	23.8795	36.0185	79.8218	94.628	56.7115	132.809	30.3268	90.9926	0.333288	62.796	1.61871	0.262698	6.16187	7.1893e-10	2.20631e-08
Tgm7	36.3951	50.457	46.963	49.6807	7.78749	13.6329	12.0297	12.912	45.874	11.5905	3.95789	27.1857	-1.97915	0.321712	-6.15194	7.65432e-10	2.40266e-08
Slitrk4	12.7875	20.5249	11.9397	9.93615	52.5656	74.5797	46.4003	67.3269	13.7971	60.2181	0.229118	37.664	2.1211	0.347311	6.10722	1.01382e-09	3.01651e-08
Gm39044	0	4.27602	2.38795	3.72606	24.3359	33.6812	15.4668	51.648	2.59751	31.283	0.0830326	15.278	3.62106	0.593491	6.10129	1.05217e-09	3.11436e-08
Tspan6	141.646	154.792	159.197	101.846	294.951	260.628	348.861	408.573	139.37	328.253	0.42458	234.629	1.22705	0.201364	6.09367	1.10353e-09	3.25626e-08
B3gnt7	130.826	119.729	111.438	132.896	215.129	279.073	278.402	272.075	123.722	261.17	0.473723	179.744	1.08012	0.178174	6.06215	1.3431e-09	4.17631e-08
2210011C24Rik	132.793	118.873	125.765	106.814	63.2734	58.5411	54.9929	50.7258	121.061	56.8833	2.12824	89.1345	-1.0901	0.180212	-6.04898	1.45762e-09	4.24145e-08
Gm15343	885.287	705.543	672.606	871.897	415.657	409.788	288.713	324.645	783.833	359.701	2.17913	562.826	-1.11801	0.184885	-6.04705	1.4752e-09	4.40293e-08
Zbtb20	22697.8	23234.2	22891.7	45255.4	12313	12005.7	12033.1	11451.1	28519.8	11950.7	2.38644	19935.7	-1.2548	0.20801	-6.03242	1.61526e-09	4.80691e-08
Nek2	176.074	190.71	179.892	120.476	71.0608	73.7778	51.5559	86.6949	166.788	70.7724	2.35668	121.177	-1.22126	0.203902	-5.98941	2.10599e-09	6.36347e-08
COX2	231.158	206.104	172.728	64.585	627.866	611.073	1926.47	1586.33	168.644	1187.94	0.141964	855.807	2.81374	0.470606	5.97898	2.24545e-09	6.36572e-08
Ugt1a6b	87.545	106.9	88.3541	111.782	30.1765	40.8986	15.4668	15.6789	98.6453	25.5552	3.86009	61.0439	-1.90578	0.319715	-5.96086	2.50911e-09	7.18173e-08
Gm30784	70.823	63.2851	52.5349	83.2152	23.3625	25.6618	22.3409	22.1349	67.4645	23.375	2.88618	49.218	-1.5084	0.253518	-5.94986	2.6837e-09	7.66685e-08
Rd3	103.283	95.7828	87.5581	108.056	44.7781	40.8986	18.9038	39.6583	98.67	36.0597	2.7363	68.2149	-1.39967	0.235386	-5.94626	2.74334e-09	7.80001e-08
Shmt2	6093.72	5312.53	5877.54	6516.87	2871.64	2875.73	3016.02	2025.34	5950.17	2697.18	2.20607	4036.32	-1.14174	0.192905	-5.91866	3.24576e-09	8.97987e-08
Tmem205	2903.74	3149.72	3928.97	2836.77	1369.62	1279.88	1637.76	1302.27	3204.8	1397.38	2.29343	2023.93	-1.19865	0.202537	-5.9182	3.2549e-09	9.20497e-08
Klhl29	49.1826	50.457	46.167	83.2152	127.52	128.309	185.601	111.597	57.2555	138.257	0.414124	93.374	1.27572	0.215714	5.91393	3.34046e-09	9.21935e-08
Trim17	272.472	268.534	206.956	293.116	157.697	122.696	104.83	106.985	260.269	123.052	2.11512	165.45	-1.06984	0.181287	-5.90135	3.60535e-09	1.00135e-07
Nat8f6	1610.24	1725.8	2001.9	1705.29	899.455	917.411	878.168	821.757	1760.81	879.198	2.00274	1180.18	-1.00214	0.169979	-5.89566	3.73178e-09	1.02877e-07
Slc13a5	41.3134	47.0362	26.2674	72.0371	4.86718	12.8309	5.15559	2.76686	46.6635	6.40514	7.28533	21.6733	-2.8004	0.475651	-5.88752	3.92041e-09	1.06977e-07
Srd5a2	164.27	188.145	197.404	155.252	59.3796	67.3623	48.1188	65.4823	176.268	60.0858	2.9336	154.96	-1.54162	0.261903	-5.88622	3.95131e-09	1.08202e-07
Cntnap5a	403.297	389.118	202.976	262.066	19.4687	1.60387	1.71853	3.68915	314.364	6.62007	47.4866	150.511	-5.54958	0.943297	-5.88317	4.02481e-09	1.14381e-07
Cand2	99.3489	82.0996	104.274	81.9732	206.368	170.01	233.72	199.214	91.9239	202.328	0.454331	149.992	1.12676	0.191804	5.87452	4.24064e-09	1.15121e-07
Serpinc1	60.0028	79.534	84.3742	81.9732	27.2562	29.6715	12.0297	12.912	76.471	20.4674	3.73624	47.3007	-1.85535	0.315898	-5.87325	4.27339e-09	1.15331e-07
Trf	1037.75	1218.67	1572.86	838.363	2025.72	3049.75	2417.97	2252.22	1166.91	2436.42	0.478946	1905.92	1.06088	0.180745	5.86949	4.37134e-09	1.28379e-07
Gm30536	234.109	224.919	256.307	299.326	144.069	113.072	65.3041	71.9383	253.665	98.5959	2.57278	187.386	-1.34558	0.230292	-5.84291	5.12955e-09	1.38941e-07
Anks1b	117.055	135.122	111.438	88.1833	65.2202	49.7198	44.6818	39.6583	112.949	49.82	2.26715	81.6108	-1.18029	0.202131	-5.83921	5.24479e-09	1.39212e-07
Ccr1	12.7875	12.8281	17.5116	12.4202	43.8046	36.8889	51.5559	66.4046	13.8868	49.6635	0.279619	32.5897	1.81825	0.311347	5.83995	5.22176e-09	1.39212e-07
Sec14l3	722.001	626.009	499.081	541.52	1282.99	921.421	1715.09	3080.44	597.153	1749.98	0.341233	1087.26	1.55109	0.26599	5.8314	5.49652e-09	1.45283e-07
Kcng1	67.872	41.905	86.7621	98.1195	16.5484	12.8309	22.3409	24.9017	73.6647	19.1555	3.84562	53.637	-1.95954	0.336051	-5.83108	5.50707e-09	1.46893e-07
Prss12	46.2316	58.1539	48.555	48.4387	98.3171	117.082	144.356	143.877	50.3448	125.908	0.399854	92.1723	1.31255	0.225174	5.82904	5.57485e-09	1.46895e-07
Pde11a	44.2643	53.0226	53.3309	37.2606	117.786	86.6087	103.112	165.089	46.9696	118.149	0.397546	85.9662	1.32223	0.227119	5.82176	5.82323e-09	1.5599e-07
1700019D03Rik	19.673	19.6697	21.4915	19.8723	47.6984	69.7681	60.1485	75.6275	20.1766	63.3106	0.318693	39.6653	1.65293	0.284222	5.81562	6.04098e-09	1.59575e-07
2810032G03Rik	2.95096	4.27602	3.18393	6.21009	17.5219	18.4444	39.5262	39.6583	4.15525	28.7877	0.144341	17.0237	2.80361	0.482269	5.81338	6.12248e-09	1.59575e-07
Gpt	639.374	625.154	934.484	691.804	287.164	287.092	371.202	303.432	722.704	312.223	2.31471	490.103	-1.2155	0.209086	-5.81341	6.12125e-09	1.59788e-07
Gm41676	50.1663	51.3122	42.1871	86.9413	20.4422	12.8309	13.7482	2.76686	57.6517	12.447	4.63176	33.8735	-2.21694	0.38183	-5.80609	6.39478e-09	1.76973e-07
Gm15350	37.3788	30.7873	38.2072	80.7312	15.575	8.01933	5.15559	6.45601	46.7761	8.80147	5.31458	25.9729	-2.35309	0.406544	-5.78803	7.12147e-09	1.85085e-07
Gm41523	12.7875	23.9457	15.1237	22.3563	60.353	40.0966	53.2744	58.104	18.5533	52.957	0.350346	37.0626	1.51703	0.26213	5.7873	7.1525e-09	1.85915e-07
Tdrkh	73.7739	52.1674	81.9862	89.4253	144.069	140.338	166.697	149.41	74.3382	150.129	0.495164	113.395	1.01618	0.175799	5.78033	7.45553e-09	1.94955e-07
Dscam	1.9673	0.855204	0	2.48404	25.3093	15.2367	17.1853	38.736	1.32664	24.1168	0.0550087	13.8077	4.34582	0.752804	5.77284	7.79456e-09	2.00793e-07
BC024386	2592.91	2623.77	2546.35	3336.06	1806.7	1432.25	996.747	1007.14	2774.77	1310.71	2.117	2073.74	-1.08027	0.187267	-5.76861	7.99269e-09	2.05133e-07
Il18bp	153.45	191.566	151.237	185.061	327.075	249.401	405.573	448.231	170.328	357.57	0.476349	267.75	1.06719	0.185194	5.76256	8.2849e-09	2.11547e-07
Gm41925	34.4278	42.7602	44.575	33.5345	4.86718	9.62319	3.43706	15.6789	38.8244	8.40158	4.62108	28.6279	-2.12737	0.369219	-5.76181	8.32163e-09	2.1174e-07
Scn5a	21.6403	15.3937	8.75581	26.0824	78.8483	53.7295	84.2079	71.0161	17.9681	71.9505	0.249728	42.3592	2.02675	0.352288	5.75311	8.76188e-09	2.21512e-07
Gm38837	156.401	125.715	110.642	196.239	78.8483	43.3044	37.8076	66.4046	147.249	56.5912	2.60198	102.804	-1.35308	0.235765	-5.73909	9.51845e-09	2.40256e-07
Cfap44	32.4605	32.4977	30.2474	31.0505	8.76093	11.2271	3.43706	5.53372	31.564	7.23969	4.35986	23.5306	-2.02569	0.353095	-5.73695	9.63951e-09	2.44288e-07
Eif2s3y	1165.63	1582.98	1224.22	909.158	31.15	1.60387	0	0	1220.5	8.18846	149.051	659.298	-7.20532	1.25698	-5.73224	9.91124e-09	2.45615e-07
Rbm11	91.4796	122.294	76.4144	116.75	39.9109	47.314	32.6521	37.8137	101.734	39.4227	2.58061	72.6777	-1.34231	0.234162	-5.7324	9.90182e-09	2.53191e-07
Slc6a9	894.14	735.475	721.957	794.892	312.473	265.44	410.728	295.132	786.616	320.943	2.45095	551.392	-1.29839	0.226754	-5.72598	1.02841e-08	2.57109e-07
Tmem252	3363.11	3053.93	4165.38	3391.95	1233.34	1177.24	1771.8	1507.02	3493.59	1422.35	2.45621	2172.84	-1.29755	0.227421	-5.7055	1.16e-08	2.96524e-07
Galr2	31.4769	26.5113	31.0433	48.4387	77.8749	92.2222	77.3338	95.9178	34.3676	85.8372	0.400381	54.2016	1.35229	0.239781	5.63971	1.70339e-08	4.15511e-07
ND3	34.4278	25.6561	32.6353	6.21009	116.812	86.6087	324.802	303.432	24.7323	207.914	0.118955	149.28	3.05617	0.542479	5.63371	1.76378e-08	4.28342e-07
Daw1	1.9673	4.27602	0	2.48404	18.4953	18.4444	18.9038	31.3577	2.18184	21.8003	0.100083	12.0923	3.36357	0.597211	5.63214	1.7799e-08	4.34067e-07
Coro2a	260.668	338.661	218.895	234.742	148.936	117.082	101.393	104.218	263.241	117.907	2.23261	188.614	-1.15375	0.204956	-5.62928	1.80961e-08	4.54241e-07
Fam83f	47.2153	37.629	50.9429	42.2286	102.211	97.8358	84.2079	84.8504	44.504	92.2762	0.482291	69.7216	1.05612	0.188375	5.60647	2.06497e-08	4.99106e-07
Slc52a3	884.303	743.172	932.096	745.211	343.623	334.406	422.758	431.63	826.196	383.104	2.15658	562.426	-1.11137	0.198892	-5.58779	2.2998e-08	5.46426e-07
Serpina1a	138.695	117.163	283.37	315.473	54.5124	36.087	85.9265	65.4823	213.675	60.502	3.5317	146.333	-1.83798	0.329908	-5.57118	2.53017e-08	6.0009e-07
Gm31954	68.8556	76.1131	63.6786	69.553	32.1234	31.2754	25.7779	27.6686	69.5501	29.2113	2.38093	53.4483	-1.23484	0.222435	-5.55147	2.83285e-08	6.63418e-07
Ano5	106.234	136.833	125.765	131.654	217.076	198.077	316.209	276.686	125.122	252.012	0.49649	190.136	0.999749	0.180152	5.54946	2.8655e-08	6.77165e-07
Kcnn3	36.3951	46.181	62.8827	59.6169	101.237	101.044	116.86	130.042	51.2689	112.296	0.456552	80.5482	1.12855	0.203649	5.54162	2.99682e-08	7.09855e-07
Ivl	4.91826	1.71041	4.7759	6.21009	22.389	24.8599	29.215	19.368	4.40366	23.958	0.183808	13.7003	2.46851	0.445734	5.53809	3.05783e-08	7.10606e-07
Zfpm2	36.3951	34.2082	42.1871	53.4068	87.6093	79.3913	94.5191	81.1612	41.5493	85.6702	0.484991	62.2669	1.05039	0.190227	5.52176	3.35619e-08	7.78888e-07
Trim61	32.4605	30.7873	24.6755	28.5664	60.353	78.5894	72.1782	71.0161	29.1224	70.5342	0.412884	48.5177	1.28104	0.232182	5.51739	3.44074e-08	7.94571e-07
Apcs	29.5096	40.1946	34.2273	16.1462	7.78749	4.00966	3.43706	2.76686	30.0194	4.50027	6.67058	15.0003	-2.73425	0.495911	-5.51359	3.51586e-08	8.13561e-07
C030029H02Rik	0	0	0	0	5.84062	14.4348	18.9038	12.912	0	13.0228	0	6.48081	6.18176	1.1223	5.50811	3.62699e-08	8.31128e-07
Gm36600	215.42	181.303	209.344	223.563	99.2905	114.676	49.8373	72.8606	207.407	84.1662	2.46426	133.537	-1.27497	0.232614	-5.48105	4.22809e-08	9.86231e-07
Slc16a14	3309.01	3200.17	2676.89	2989.54	1693.78	2044.93	1034.55	1278.29	3043.9	1512.89	2.01198	1853.05	-1.00653	0.185719	-5.41965	5.97147e-08	1.36445e-06
Gm33009	6.88556	6.84163	11.9397	3.72606	27.2562	31.2754	30.9335	56.2595	7.34825	36.4311	0.201702	23.8287	2.26984	0.419256	5.41398	6.16397e-08	1.36826e-06
Gm8675	65.9047	77.8236	50.9429	59.6169	28.2297	31.2754	15.4668	21.2126	63.572	24.0461	2.64376	60.0715	-1.35327	0.249978	-5.41356	6.17832e-08	1.37764e-06
Klk1b16	44.2643	57.2987	46.167	17.3883	6.81405	6.41546	15.4668	5.53372	41.2796	8.5575	4.82379	18.1174	-2.3883	0.441357	-5.41127	6.258e-08	1.40661e-06
Sec14l4	27.5423	34.2082	25.4715	33.5345	3.89375	6.41546	5.15559	6.45601	30.1891	5.4802	5.50876	17.6884	-2.43922	0.451121	-5.40701	6.40852e-08	1.41818e-06
Fut4	50.1663	52.1674	58.9027	37.2606	78.8483	118.686	108.267	141.11	49.6242	111.728	0.444153	75.526	1.15993	0.214998	5.39507	6.84982e-08	1.50089e-06
Scrg1	0.983652	0.855204	3.18393	1.24202	14.6015	24.8599	12.0297	30.4355	1.5662	20.4817	0.0764685	12.9045	3.68072	0.683793	5.3828	7.33352e-08	1.61123e-06
Ptpn5	5.90191	5.98643	3.97992	3.72606	26.2828	24.8599	29.215	54.4149	4.89858	33.6931	0.145388	18.6953	2.77726	0.516145	5.38077	7.41678e-08	1.61865e-06
Cct6b	81.6431	72.6923	86.7621	110.54	42.8312	32.0773	32.6521	49.8035	87.9093	39.341	2.23455	66.594	-1.13625	0.211491	-5.37256	7.76264e-08	1.73414e-06
Zdhhc2	280.341	371.158	228.447	202.449	107.078	102.647	106.549	154.944	270.599	117.805	2.29702	182.088	-1.19864	0.223373	-5.36608	8.04657e-08	1.80839e-06
Alx1	60.9864	75.2579	81.9862	69.553	136.281	108.261	213.098	200.136	71.9459	164.444	0.43751	129.924	1.17522	0.21958	5.35213	8.69237e-08	1.87606e-06
Zdbf2	4.91826	3.42082	3.18393	3.72606	29.2031	16.8406	22.3409	25.824	3.81227	23.5521	0.161865	15.6291	2.63749	0.492903	5.35093	8.75026e-08	1.89292e-06
Rasl10b	20.6567	17.9593	14.3277	6.21009	62.2999	70.5701	42.9632	39.6583	14.7884	53.8729	0.274506	28.5026	1.85147	0.346134	5.34899	8.8445e-08	1.92947e-06
Cyp4f15	25.575	39.3394	31.0433	38.5026	6.81405	11.2271	8.59265	10.1452	33.6151	9.19473	3.65591	22.9083	-1.84484	0.345699	-5.33656	9.47277e-08	2.04346e-06
A730020M07Rik	57.0518	51.3122	50.1469	72.0371	25.3093	20.8502	18.9038	25.824	57.637	22.7219	2.53663	39.9997	-1.31076	0.245808	-5.33248	9.68813e-08	2.06758e-06
Hyi	1425.31	1337.54	1445.51	1230.84	674.591	590.222	725.219	665.891	1359.8	663.981	2.04795	931.789	-1.03571	0.194594	-5.32241	1.02401e-07	2.28498e-06
Gm15713	204.6	266.824	278.594	486.871	130.44	122.696	60.1485	55.3372	309.222	92.1555	3.35544	196.829	-1.73403	0.327006	-5.30276	1.14065e-07	2.41036e-06
AI481877	21.6403	26.5113	24.6755	21.1143	0.973436	2.4058	5.15559	3.68915	23.4854	3.05599	7.68502	14.5295	-3.05392	0.576048	-5.30151	1.14848e-07	2.41505e-06
Apoh	379.69	596.932	417.891	322.925	15.575	0	0	11.0674	429.359	6.6606	64.4625	180.175	-5.98776	1.12956	-5.30098	1.15183e-07	2.44294e-06
D7Ertd443e	31.4769	13.6833	22.2875	22.3563	50.6187	50.5218	87.645	78.3944	22.451	66.7949	0.336118	49.799	1.56254	0.294891	5.29871	1.16626e-07	2.47016e-06
Spc25	436.742	523.385	440.179	267.034	768.041	712.116	1089.55	1252.47	416.835	955.542	0.436228	652.96	1.19348	0.226419	5.27112	1.35592e-07	2.82278e-06
Gm41432	27.5423	24.8009	19.8996	73.2791	6.81405	0	0	6.45601	36.3805	3.31751	10.9662	20.6947	-3.36071	0.6381	-5.26673	1.38872e-07	2.95531e-06
Shroom1	115.087	82.9548	82.7822	136.622	30.1765	36.8889	29.215	47.0366	104.362	35.8293	2.91275	78.9111	-1.51981	0.289011	-5.25866	1.45109e-07	3.03881e-06
Eps8l3	39.3461	38.4842	29.4514	19.8723	8.76093	8.82126	5.15559	11.0674	31.7885	8.4513	3.76137	24.5625	-1.86877	0.355827	-5.25191	1.50526e-07	3.10133e-06
Stc2	53.1172	48.7466	51.7389	32.2925	123.626	86.6087	130.608	86.6949	46.4738	106.885	0.434804	67.0893	1.17205	0.224532	5.21997	1.78955e-07	3.68096e-06
Ttpa	354.115	593.512	433.015	381.3	239.465	157.981	213.098	247.173	440.485	214.429	2.05422	323.939	-1.04173	0.200328	-5.20013	1.99144e-07	4.04174e-06
Gm36363	7.86922	0.855204	4.7759	11.1782	25.3093	48.9179	27.4965	27.6686	6.16962	32.3481	0.190726	19.3523	2.47898	0.476982	5.19722	2.02288e-07	4.07948e-06
Slc22a12	47399.2	44137.1	48976.8	38443	15197.3	14775.6	21261.6	15061.9	44739	16574.1	2.69933	26048.3	-1.43268	0.276158	-5.18789	2.12688e-07	4.26589e-06
Ccdc182	1.9673	0	3.18393	0	12.6547	17.6425	42.9632	24.9017	1.28781	24.5405	0.0524768	9.45091	4.11993	0.7942	5.18753	2.13107e-07	4.2986e-06
Lrit3	24.5913	18.8145	33.4313	27.3244	73.9812	69.7681	49.8373	66.4046	26.0404	64.9978	0.400635	40.6971	1.33478	0.257962	5.17433	2.28733e-07	4.56949e-06
Bcl6	2003.7	2087.55	1495.65	1773.6	489.638	334.406	469.158	474.978	1840.13	442.045	4.16276	1193.56	-2.05797	0.397765	-5.17384	2.29329e-07	4.64559e-06
Gm30143	12.7875	17.1041	19.1036	11.1782	0	0	0	0.922286	15.0433	0.230572	65.2436	10.4723	-5.57592	1.07929	-5.16628	2.38802e-07	4.77787e-06
Spag5	117.055	118.873	126.561	100.604	229.731	238.174	206.223	278.531	115.773	238.165	0.486105	190.579	1.04081	0.201512	5.16499	2.40449e-07	4.79358e-06
Trim6	16.7221	18.8145	10.3478	8.69413	38.9375	52.9276	41.2447	34.1246	13.6446	41.8086	0.326359	30.736	1.60357	0.310973	5.15662	2.51446e-07	4.97426e-06
Sorcs2	44.2643	34.2082	46.167	27.3244	88.5827	93.0242	85.9265	88.5395	37.991	89.0182	0.426778	68.1839	1.21654	0.236006	5.15467	2.54078e-07	5.08542e-06
Gm36394	66.8883	65.8507	64.4746	93.1514	33.0968	26.4638	6.87412	15.6789	72.5913	20.5284	3.53614	45.9106	-1.75851	0.341498	-5.1494	2.61318e-07	5.16968e-06
Halr1	79.6758	94.9276	82.7822	40.9866	163.537	184.444	152.949	149.41	74.5931	162.585	0.458793	111.21	1.11105	0.216728	5.12645	2.95257e-07	5.81419e-06
Gm36438	15.7384	21.3801	7.95983	70.7951	0.973436	0	0	0.922286	28.9684	0.473931	61.1236	14.8296	-5.76865	1.12577	-5.12419	2.98817e-07	5.83071e-06
Wdr81	3540.16	2747.77	2983.34	3975.7	1570.15	1532.49	1694.47	1022.82	3311.74	1454.98	2.27614	2212.17	-1.187	0.233392	-5.08586	3.65955e-07	7.09243e-06
Sorcs1	24.5913	36.7738	33.4313	26.0824	5.84062	6.41546	10.3112	7.37829	30.2197	7.48639	4.03662	17.6133	-2.07777	0.40904	-5.07962	3.78184e-07	7.30054e-06
Gm39972	401.33	289.914	371.724	340.313	149.909	128.309	171.853	145.721	350.82	148.948	2.35532	287.201	-1.24133	0.244588	-5.07521	3.87064e-07	7.46184e-06
Gm39544	27.5423	29.9321	43.7791	26.0824	3.89375	12.029	1.71853	6.45601	31.834	6.02432	5.28424	18.4131	-2.28754	0.450897	-5.07331	3.90963e-07	7.55885e-06
Gm32391	362.968	332.674	361.376	500.534	230.704	230.155	125.453	178.001	389.388	191.078	2.03785	290.036	-1.01161	0.199532	-5.06989	3.98036e-07	7.67176e-06
E130012A19Rik	42.297	35.9186	39.0032	32.2925	11.6812	12.029	20.6223	5.53372	37.3778	12.4666	2.99824	26.4423	-1.68067	0.331635	-5.06783	4.02379e-07	7.72684e-06
Gatsl3	259.684	259.127	300.882	279.454	133.361	140.338	139.201	86.6949	274.787	124.899	2.20008	198.298	-1.14183	0.225545	-5.06255	4.13686e-07	7.97485e-06
Alk	36.3951	29.0769	35.0233	39.7446	11.6812	7.21739	6.87412	14.7566	35.06	10.1323	3.46021	24.3433	-1.75194	0.346314	-5.05882	4.21857e-07	7.98743e-06
Itm2a	30.4932	34.2082	32.6353	23.5984	55.4859	65.7585	63.5856	82.0835	30.2338	66.7284	0.453087	50.7141	1.13024	0.223689	5.05273	4.35548e-07	8.26018e-06
Zbtb16	801.676	378	304.861	573.813	218.05	205.295	122.016	104.218	514.588	162.395	3.16875	278.084	-1.65861	0.328418	-5.05029	4.41142e-07	8.35217e-06
LOC105246106	30.4932	30.7873	20.6956	36.0185	7.78749	8.01933	3.43706	9.22286	29.4987	7.11668	4.145	16.8291	-1.96176	0.388961	-5.04359	4.56886e-07	8.65636e-06
Vcan	169.188	163.344	168.748	231.015	292.031	283.082	587.737	436.242	183.074	399.773	0.457945	324.553	1.12298	0.222798	5.04033	4.64719e-07	8.72536e-06
Hspa1b	416.085	569.566	987.019	625.977	278.403	271.855	333.395	312.655	649.662	299.077	2.17222	358.583	-1.12264	0.223102	-5.03195	4.85523e-07	9.28321e-06
Gm42061	21.6403	14.5385	18.3076	14.9042	41.8578	51.3237	54.9929	35.0469	17.3477	45.8053	0.378726	33.2595	1.38038	0.275011	5.01937	5.18424e-07	9.62306e-06
Abcb1a	240.995	243.733	192.628	279.454	434.153	358.464	860.983	574.584	239.202	557.046	0.429412	398.61	1.21619	0.242753	5.00999	5.44337e-07	1.02241e-05
Kcna1	27.5423	33.353	19.1036	33.5345	69.114	44.1063	151.231	88.5395	28.3833	88.2476	0.321633	56.9743	1.61855	0.323255	5.00703	5.52767e-07	1.02854e-05
Gm16505	138.695	134.267	94.722	146.558	79.8218	52.1256	39.5262	30.4355	128.561	50.4773	2.5469	76.5672	-1.33322	0.266699	-4.99898	5.76346e-07	1.07206e-05
Lrg1	40.3297	57.2987	54.1268	67.069	15.575	19.2464	25.7779	16.6012	54.7061	19.3001	2.83449	36.05	-1.53464	0.30762	-4.98877	6.07655e-07	1.11426e-05
Gm34119	6.88556	1.71041	4.7759	1.24202	18.4953	17.6425	22.3409	23.9794	3.65347	20.6145	0.177228	11.8936	2.45074	0.491742	4.9838	6.23485e-07	1.14277e-05
Rgs14	19.673	17.9593	26.2674	21.1143	59.3796	63.3527	56.7115	52.5703	21.2535	58.0035	0.366418	33.9233	1.44585	0.290931	4.96974	6.70437e-07	1.24481e-05
Hpcal4	40.3297	23.9457	21.4915	28.5664	56.4593	63.3527	99.6747	59.0263	28.5834	69.6283	0.410514	50.5124	1.26667	0.255154	4.96433	6.89382e-07	1.253e-05
Akr1c12	62.9537	55.5883	66.8626	59.6169	128.494	99.4396	127.171	140.188	61.2554	123.823	0.494701	96.8469	1.00992	0.204008	4.95039	7.40651e-07	1.34527e-05
Naaladl1	22.624	39.3394	21.4915	22.3563	128.494	160.387	56.7115	78.3944	26.4528	105.996	0.249563	46.5809	2.00692	0.406702	4.93463	8.03031e-07	1.43245e-05
Ahrr	9.83652	14.5385	8.75581	13.6622	29.2031	44.1063	46.4003	43.3475	11.6983	40.7643	0.286973	29.9605	1.80563	0.366057	4.93265	8.11226e-07	1.44374e-05
Gm12426	53.1172	44.4706	32.6353	48.4387	102.211	103.449	75.6153	78.3944	44.6655	89.9174	0.496739	79.3159	1.03513	0.210662	4.91372	8.93659e-07	1.58707e-05
Dclk1	25.575	21.3801	28.6554	12.4202	86.6358	63.3527	63.5856	50.7258	22.0077	66.075	0.333071	49.5802	1.56396	0.319184	4.89986	9.59041e-07	1.71108e-05
Cyp2a5	3593.28	2703.3	2843.25	6018.82	1144.76	522.058	1656.66	870.638	3789.66	1048.53	3.61426	2386.59	-1.85484	0.379453	-4.8882	1.01763e-06	1.80789e-05
Banp	601.011	726.923	785.635	880.591	380.614	395.353	268.091	248.095	748.54	323.038	2.31719	418.859	-1.20924	0.247533	-4.88518	1.03336e-06	1.84712e-05
Hist1h4i	57.0518	64.1403	59.6987	39.7446	23.3625	20.0483	15.4668	22.1349	55.1589	20.2531	2.72348	30.2525	-1.43104	0.293536	-4.87518	1.08707e-06	1.93291e-05
Gm38505	12.7875	35.9186	10.3478	67.069	2.92031	0.801933	0	0	31.5307	0.93056	33.8836	16.2168	-4.96964	1.02034	-4.87057	1.11278e-06	1.93735e-05
Jchain	1289.57	2705.87	776.879	797.376	360.171	122.696	348.861	320.033	1392.42	287.94	4.8358	1748.66	-2.27542	0.467214	-4.87018	1.11494e-06	1.95332e-05
Ttr	4346.76	4970.45	5254.28	2887.69	1677.23	2164.42	2096.61	1469.2	4364.8	1851.86	2.35697	2678.96	-1.23738	0.254169	-4.86832	1.12551e-06	1.97612e-05
Serpina10	20.6567	24.8009	18.3076	26.0824	93.4499	45.7102	37.8076	96.8401	22.4619	68.4519	0.328141	48.6413	1.63044	0.335797	4.85545	1.20114e-06	2.10175e-05
Gm28905	22.624	29.0769	19.1036	26.0824	6.81405	6.41546	1.71853	6.45601	24.2217	5.35101	4.52657	18.7598	-2.07242	0.427302	-4.85002	1.23449e-06	2.14113e-05
Arhgap15	215.42	221.498	223.671	242.194	97.3436	84.2029	101.393	142.032	225.696	106.243	2.12433	164.234	-1.0855	0.22432	-4.83906	1.30454e-06	2.2454e-05
LOC108168025	11.8038	10.2624	7.95983	4.96807	20.4422	40.8986	25.7779	34.1246	8.74854	30.3108	0.288628	19.5816	1.7902	0.37107	4.82443	1.40405e-06	2.41591e-05
4933440N22Rik	39.3461	41.905	60.4947	42.2286	18.4953	14.4348	29.215	11.9897	45.9936	18.5337	2.48162	33.8248	-1.40204	0.290821	-4.82096	1.42872e-06	2.46054e-05
Gm6300	1429.25	2032.82	1658.83	1126.51	109.025	9.62319	44.6818	399.35	1561.85	140.67	11.1029	894.476	-3.47069	0.720279	-4.81853	1.44618e-06	2.46202e-05
Tnnc1	76.7249	55.5883	61.2907	89.4253	26.2828	23.256	18.9038	26.7463	70.7573	23.7972	2.97334	36.4977	-1.54793	0.321814	-4.81001	1.50926e-06	2.56908e-05
Nusap1	133.777	158.213	124.173	131.654	75.928	64.1546	29.215	71.9383	136.954	60.309	2.27087	98.3995	-1.14944	0.239171	-4.80592	1.54044e-06	2.60144e-05
Gm39900	51.1499	64.9955	62.0867	101.846	26.2828	32.0773	30.9335	38.736	70.0194	32.0074	2.1876	66.3111	-1.10642	0.232	-4.76904	1.85104e-06	3.08593e-05
Mtus2	16.7221	14.5385	15.9197	22.3563	39.9109	48.116	49.8373	60.8709	17.3841	49.6838	0.349896	26.7047	1.534	0.321666	4.76891	1.85221e-06	3.09513e-05
Per2	1521.71	1308.46	1576.84	2753.56	796.271	907.788	1055.18	619.777	1790.14	844.753	2.11913	1102.85	-1.08425	0.227489	-4.76614	1.87786e-06	3.12215e-05
Armc12	17.7057	14.5385	18.3076	19.8723	4.86718	0	0	1.84457	17.606	1.67794	10.4927	8.71041	-3.30627	0.695458	-4.7541	1.99335e-06	3.33281e-05
Gm37548	19.673	22.2353	23.8795	36.0185	4.86718	4.8116	5.15559	4.61143	25.4516	4.86145	5.23539	12.8246	-2.385	0.50276	-4.74382	2.09728e-06	3.46035e-05
E030030I06Rik	52.1336	42.7602	39.7992	62.1009	22.389	13.6329	20.6223	8.30058	49.1985	16.2362	3.03017	26.2901	-1.62686	0.343002	-4.74301	2.1057e-06	3.46289e-05
Gm11837	29.5096	30.7873	39.7992	13.6622	58.4062	89.8165	80.7709	83.0058	28.4396	77.9998	0.364611	58.551	1.42914	0.301335	4.7427	2.10885e-06	3.4649e-05
Ube2c	17.7057	16.2489	16.7156	9.93615	42.8312	32.0773	54.9929	58.104	15.1516	47.0014	0.322365	31.0486	1.60018	0.338077	4.73318	2.21032e-06	3.62122e-05
Synpr	46.2316	79.534	17.5116	26.0824	1.94687	0.801933	0	2.76686	42.3399	1.37892	30.7052	33.1999	-4.84509	1.0242	-4.7306	2.23858e-06	3.66306e-05
Ifi44l	2.95096	0.855204	3.97992	3.72606	20.4422	14.4348	10.3112	27.6686	2.87803	18.2142	0.158011	8.91218	2.71217	0.573405	4.72993	2.24597e-06	3.66382e-05
Kcne1l	26.5586	17.9593	21.4915	12.4202	47.6984	60.1449	58.43	62.7155	19.6074	57.2472	0.342504	31.1723	1.53163	0.325193	4.7099	2.47836e-06	4.04624e-05
Gm33906	20.6567	22.2353	14.3277	6.21009	0.973436	0.801933	0	0	15.8574	0.443842	35.7277	8.6445	-4.94983	1.0513	-4.70832	2.49773e-06	4.06333e-05
Gm33467	54.1009	44.4706	41.3911	171.399	26.2828	20.0483	5.15559	11.9897	77.8403	15.8691	4.90515	50.5887	-2.2405	0.475963	-4.7073	2.51015e-06	4.0642e-05
Trpc4	3.93461	5.98643	4.7759	7.45211	29.2031	21.6522	37.8076	28.5909	5.53726	29.3134	0.188898	24.5141	2.40663	0.511401	4.70596	2.5268e-06	4.08801e-05
Ankrd65	140.662	156.502	163.972	156.494	64.2468	49.7198	70.4597	50.7258	154.408	58.788	2.62652	96.5442	-1.40498	0.298835	-4.70154	2.5821e-06	4.19689e-05
Smcp	28.5259	24.8009	30.2474	19.8723	7.78749	1.60387	12.0297	3.68915	25.8616	6.27755	4.1197	18.8858	-2.21155	0.471539	-4.69007	2.73112e-06	4.42276e-05
Mia	3.93461	9.40724	7.16385	8.69413	24.3359	26.4638	18.9038	30.4355	7.29996	25.0347	0.291593	15.618	1.80391	0.385199	4.68305	2.82642e-06	4.51833e-05
Gm40260	23.6077	27.3665	27.0634	34.7765	73.0077	49.7198	61.867	71.0161	28.2035	63.9027	0.441351	51.6392	1.19002	0.254162	4.68212	2.83927e-06	4.52318e-05
D14Ertd670e	7.86922	14.5385	18.3076	8.69413	0	0	0	0.922286	12.3524	0.230572	53.5727	6.93638	-5.29124	1.13172	-4.67541	2.93371e-06	4.68926e-05
Adam11	344.278	336.095	327.945	412.35	182.033	141.942	103.112	111.597	355.167	134.671	2.6373	212.367	-1.39321	0.298121	-4.67329	2.96415e-06	4.72982e-05
Podxl2	15.7384	17.1041	25.4715	21.1143	56.4593	48.116	53.2744	41.5029	19.8571	49.8381	0.398431	37.4721	1.31566	0.281624	4.67168	2.98739e-06	4.73481e-05
Ppp1r3c	57.0518	79.534	91.538	68.311	136.281	133.121	230.283	154.944	74.1087	163.657	0.452829	117.702	1.12313	0.240697	4.66617	3.06867e-06	4.90214e-05
Adamts13	2.95096	5.98643	3.18393	0	10.7078	24.058	32.6521	18.4457	3.03033	21.4659	0.141169	11.7214	2.71066	0.581464	4.66179	3.13468e-06	4.95073e-05
Ankmy1	16.7221	19.6697	13.5317	27.3244	44.7781	48.116	36.0891	59.0263	19.312	47.0024	0.410872	32.3491	1.33346	0.286199	4.65922	3.17412e-06	5.00224e-05
Etv4	5.90191	12.8281	20.6956	13.6622	45.7515	40.0966	41.2447	32.28	13.2719	39.8432	0.333104	27.0976	1.56167	0.335697	4.65202	3.28693e-06	5.19004e-05
Lrrc15	128.858	100.059	65.2706	54.6488	47.6984	25.6618	29.215	27.6686	87.2092	32.561	2.67834	47.2412	-1.42277	0.307235	-4.63088	3.64109e-06	5.8413e-05
Aspdh	1713.52	1486.34	1747.98	1658.09	689.193	769.053	790.523	518.325	1651.48	691.774	2.38732	1037.79	-1.2561	0.271775	-4.62185	3.80324e-06	5.96611e-05
Cited1	6.88556	0.855204	0.795983	0	7.78749	32.8792	24.0594	20.2903	2.13419	21.2541	0.100413	9.4373	3.31586	0.717669	4.62031	3.8316e-06	5.98273e-05
C4a	76.7249	90.6516	80.3943	63.3429	24.3359	16.8406	17.1853	5.53372	77.7784	15.9739	4.8691	44.2781	-2.29177	0.497808	-4.60372	4.15003e-06	6.39906e-05
D230017M19Rik	601.011	557.593	466.446	891.769	341.676	371.295	152.949	265.619	629.205	282.885	2.22425	455.594	-1.1436	0.248453	-4.60286	4.16728e-06	6.43697e-05
Fam229b	45.248	76.1131	66.8626	48.4387	120.706	105.855	109.986	144.799	59.1656	120.337	0.491668	89.5844	1.01482	0.220539	4.60156	4.19344e-06	6.44768e-05
Mlxipl	2382.41	2026.83	2088.66	3527.33	1620.77	1310.36	1080.95	860.493	2506.31	1218.14	2.05748	1872.33	-1.03992	0.226043	-4.60052	4.21438e-06	6.46814e-05
Adgrf1	89.5123	88.086	73.2304	104.33	136.281	146.754	216.535	228.727	88.7896	182.074	0.487656	133.506	1.0356	0.225131	4.59996	4.22569e-06	6.4866e-05
Cacna1g	51.1499	39.3394	54.1268	72.0371	125.573	93.0242	142.638	100.529	54.1633	115.441	0.469185	78.387	1.09203	0.237815	4.59194	4.39147e-06	6.6929e-05
Pdxk-ps	9.83652	5.13122	8.75581	7.45211	24.3359	22.4541	32.6521	44.2698	7.79392	30.928	0.252002	21.772	1.98518	0.432087	4.59441	4.33982e-06	6.6929e-05
B4galnt4	19.673	21.3801	20.6956	16.1462	3.89375	1.60387	3.43706	5.53372	19.4737	3.6171	5.3838	13.8948	-2.45247	0.534359	-4.58955	4.44198e-06	6.86898e-05
Grem2	114.104	101.769	151.237	149.042	270.615	222.135	309.335	281.297	129.038	270.846	0.476426	271.393	1.0679	0.233475	4.57394	4.78645e-06	7.24852e-05
Iqca	0.983652	4.27602	2.38795	2.48404	17.5219	12.029	18.9038	14.7566	2.53291	15.8028	0.160283	8.58546	2.59059	0.567058	4.56847	4.91308e-06	7.43552e-05
Aim1l	72.7903	71.8371	69.2505	78.2472	20.4422	22.4541	36.0891	26.7463	73.0313	26.4329	2.76289	42.7358	-1.49576	0.327626	-4.56546	4.98407e-06	7.68005e-05
Hist1h2bk	25.575	34.2082	17.5116	38.5026	5.84062	9.62319	6.87412	5.53372	28.9493	6.96791	4.15466	13.7937	-2.02683	0.445352	-4.55107	5.33731e-06	8.01788e-05
Gm34771	18.6894	29.9321	37.4112	16.1462	51.5921	57.7391	53.2744	65.4823	25.5447	57.022	0.44798	43.2035	1.12551	0.247569	4.54626	5.46064e-06	8.20384e-05
Il5ra	138.695	151.371	133.725	161.462	82.7421	64.1546	67.0226	53.4926	146.313	66.853	2.18858	110.938	-1.12999	0.249862	-4.52246	6.11259e-06	9.0118e-05
Gm30162	7.86922	16.2489	6.36786	6.21009	35.0437	24.8599	22.3409	38.736	9.17401	30.2451	0.303322	22.0053	1.71303	0.37907	4.51904	6.21214e-06	9.22868e-05
Gm41035	24.5913	17.1041	9.5518	21.1143	4.86718	0.801933	3.43706	2.76686	18.0904	2.96826	6.09461	13.5616	-2.65634	0.589396	-4.50688	6.57886e-06	9.68217e-05
Fbxo16	17.7057	16.2489	21.4915	23.5984	45.7515	46.5121	48.1188	45.192	19.7611	46.3936	0.425945	34.1886	1.23845	0.276073	4.48597	7.25835e-06	0.000105552
Naip1	5.90191	4.27602	7.16385	9.93615	27.2562	17.6425	22.3409	21.2126	6.81948	22.1131	0.308392	18.1498	1.72713	0.385628	4.47873	7.50879e-06	0.000108873
Trim47	920.698	708.109	810.311	778.746	413.71	434.647	410.728	279.453	804.466	384.635	2.09151	516.496	-1.06519	0.238156	-4.47264	7.72602e-06	0.000111069
Gm40031	0	0	1.59197	0	11.6812	8.82126	12.0297	21.2126	0.397992	13.4362	0.0296208	6.79578	4.83607	1.0848	4.45803	8.27158e-06	0.000118056
Vaultrc5	11.8038	5.98643	22.2875	12.4202	36.0171	30.4734	44.6818	47.0366	13.1245	39.5522	0.331827	27.4683	1.56476	0.351015	4.45782	8.27957e-06	0.000118524
Ppp1r3b	73.7739	70.9819	81.9862	67.069	121.68	213.314	135.764	177.079	73.4528	161.959	0.453527	124.9	1.14431	0.257749	4.4396	9.01253e-06	0.000128265
Ffar3	33.4442	15.3937	22.2875	17.3883	9.73436	4.8116	3.43706	0.922286	22.1284	4.72633	4.68195	12.5783	-2.20426	0.496868	-4.43631	9.15142e-06	0.000131654
Adrm1	773.151	546.475	733.1	771.294	396.189	351.246	309.335	186.302	706.005	310.768	2.27181	468.185	-1.18341	0.267467	-4.42449	9.66689e-06	0.000136512
P2ry2	116.071	116.308	125.765	218.595	276.456	234.966	381.513	278.531	144.185	292.867	0.492323	210.048	1.02446	0.231888	4.4179	9.9666e-06	0.000140046
Postn	97.3816	162.489	194.22	136.622	354.331	548.522	202.786	306.199	147.678	352.96	0.418399	291.76	1.25958	0.285141	4.41739	9.9899e-06	0.000140228
Far1os	51.1499	90.6516	59.6987	103.088	36.0171	44.1063	27.4965	35.0469	76.1469	35.6667	2.13496	61.7001	-1.05525	0.239113	-4.41317	1.01866e-05	0.000142714
Cox8b	53.1172	9.40724	52.5349	67.069	91.503	131.517	230.283	194.602	45.5321	161.976	0.281103	97.9072	1.835	0.415888	4.41224	1.02306e-05	0.00014292
Alms1-ps2	162.303	128.281	163.972	166.43	103.184	88.2126	39.5262	47.0366	155.247	69.4899	2.23409	104.017	-1.13459	0.257604	-4.40438	1.06085e-05	0.000148146
Rfx4	2.95096	0.855204	0.795983	2.48404	10.7078	9.62319	22.3409	12.912	1.77155	13.896	0.127486	7.71387	2.99681	0.680588	4.40326	1.06634e-05	0.000148391
3110045C21Rik	203.616	293.335	216.507	177.609	99.2905	67.3623	109.986	131.887	222.767	102.131	2.18118	153.921	-1.13271	0.257704	-4.39539	1.10573e-05	0.000154266
Mir196a-1	17.7057	15.3937	27.0634	16.1462	53.539	43.3044	36.0891	40.5806	19.0773	43.3783	0.439789	31.9012	1.17843	0.268335	4.39162	1.12509e-05	0.000156335
Fat3	21.6403	25.6561	17.5116	27.3244	36.9906	49.7198	53.2744	62.7155	23.0331	50.6751	0.454526	52.4061	1.15008	0.262093	4.38806	1.14367e-05	0.000158705
Pkd1l1	64.921	48.7466	39.0032	81.9732	25.3093	24.058	34.3706	14.7566	58.661	24.6236	2.38231	38.6615	-1.2779	0.291487	-4.38408	1.16479e-05	0.000160725
Lum	60.0028	105.19	93.13	62.1009	216.103	208.502	113.423	168.778	80.106	176.702	0.45334	136.43	1.14223	0.261216	4.37274	1.22696e-05	0.000174212
Hist2h3c2	37.3788	38.4842	17.5116	26.0824	8.76093	6.41546	12.0297	6.45601	29.8642	8.41552	3.54871	12.8193	-1.8874	0.432575	-4.36317	1.28192e-05	0.000176433
Mn1	145.581	136.833	157.605	289.39	90.5296	84.2029	73.8968	71.9383	182.352	80.1419	2.27536	129.901	-1.17639	0.269722	-4.36149	1.29179e-05	0.000176825
Angptl4	1420.39	935.593	1196.36	1592.27	450.701	426.628	776.775	813.457	1286.15	616.89	2.0849	783.133	-1.06175	0.243452	-4.36126	1.29318e-05	0.000176911
Kif5a	69.8393	71.8371	66.0666	110.54	43.8046	32.0773	39.5262	28.5909	79.5707	35.9997	2.21031	55.5983	-1.14574	0.262816	-4.35947	1.30375e-05	0.000178778
Il17f	4.91826	1.71041	8.75581	4.96807	13.6281	21.6522	18.9038	35.9692	5.08814	22.5383	0.225755	13.5198	2.14509	0.492956	4.35148	1.35221e-05	0.000186547
Itga2	37.3788	40.1946	46.167	58.3749	77.8749	75.3817	125.453	91.3064	45.5288	92.5039	0.492183	68.8168	1.01074	0.232501	4.34726	1.3785e-05	0.000187517
Fam169a	49.1826	70.9819	40.5951	67.069	143.095	84.2029	103.112	137.421	56.9572	116.958	0.48699	88.9871	1.04742	0.24103	4.34559	1.38905e-05	0.000188532
Gm36738	17.7057	17.9593	14.3277	8.69413	30.1765	31.2754	37.8076	58.104	14.6717	39.3409	0.372938	26.6723	1.40123	0.323228	4.3351	1.45691e-05	0.000197869
Tmem82	186.894	195.842	243.571	190.029	105.131	96.2319	101.393	73.7829	204.084	94.1348	2.168	141.584	-1.12122	0.258869	-4.33122	1.48288e-05	0.000200189
Gcnt3	22.624	38.4842	38.2072	22.3563	51.5921	76.1836	80.7709	118.053	30.4179	81.6498	0.372541	53.4093	1.40995	0.326701	4.31572	1.59083e-05	0.000212866
Gm33587	12.7875	23.0905	17.5116	32.2925	5.84062	3.20773	5.15559	6.45601	21.4205	5.16499	4.14726	13.1604	-2.04988	0.476236	-4.30433	1.67494e-05	0.000223691
Ms4a2	3.93461	15.3937	7.16385	6.21009	26.2828	25.6618	24.0594	32.28	8.17555	27.071	0.302004	21.8693	1.70292	0.39673	4.29239	1.76761e-05	0.000234303
Ccl28	3205.72	5227.01	1753.55	2253.02	845.916	194.068	840.361	1087.38	3109.83	741.93	4.19153	1788.15	-2.06795	0.484166	-4.27116	1.94459e-05	0.000255734
Gm39623	16.7221	27.3665	31.0433	9.93615	2.92031	2.4058	10.3112	4.61143	21.267	5.06218	4.20116	11.7989	-2.25236	0.532151	-4.23256	2.31043e-05	0.000297512
Gm34365	163.286	190.71	148.053	331.619	135.308	103.449	49.8373	70.0938	208.417	89.672	2.32422	151.674	-1.19566	0.283155	-4.22264	2.41458e-05	0.000311412
Lrrc55	11.8038	21.3801	21.4915	9.93615	27.2562	42.5024	41.2447	44.2698	16.1529	38.8183	0.416116	31.8057	1.21999	0.289179	4.21879	2.4562e-05	0.000315458
Hist1h2bj	35.4115	41.905	12.7357	45.9547	9.73436	7.21739	5.15559	5.53372	34.0017	6.91027	4.92047	11.8509	-2.26731	0.537546	-4.21788	2.46612e-05	0.000318504
Gm32543	0.983652	1.71041	2.38795	1.24202	18.4953	15.2367	1.71853	11.9897	1.58101	11.8601	0.133305	9.33396	2.93391	0.695943	4.21574	2.48962e-05	0.000319227
Gm33050	41.3134	54.7331	44.575	67.069	29.2031	22.4541	10.3112	16.6012	51.9226	19.6424	2.6434	40.7673	-1.34832	0.320796	-4.20306	2.63331e-05	0.000337423
Ppm1j	84.5941	79.534	81.9862	63.3429	33.0968	43.3044	32.6521	44.2698	77.3643	38.3307	2.01834	59.9581	-1.00049	0.239229	-4.18212	2.88803e-05	0.000370427
Gm13387	30.4932	23.0905	18.3076	31.0505	58.4062	49.7198	46.4003	52.5703	25.7354	51.7742	0.497071	41.1937	1.04091	0.249148	4.17788	2.94236e-05	0.000374112
Gm14957	7.86922	11.9729	16.7156	27.3244	3.89375	0	1.71853	2.76686	15.9705	2.09478	7.62395	8.81751	-2.93851	0.705746	-4.1637	3.1313e-05	0.000393545
Prss35	20.6567	18.8145	19.1036	17.3883	45.7515	44.1063	97.9562	62.7155	18.9908	62.6324	0.30321	57.3733	1.7011	0.408631	4.16293	3.14192e-05	0.000393641
Gng7	13.7711	17.9593	27.0634	27.3244	45.7515	51.3237	37.8076	45.192	21.5296	45.0187	0.478236	34.5595	1.08819	0.262262	4.14926	3.33558e-05	0.000415261
Elf5	78.6922	60.7195	72.4345	69.553	119.733	109.063	180.446	169.701	70.3498	144.735	0.486058	101.067	1.03234	0.249548	4.13683	3.5214e-05	0.000435012
Vmn1r18	35.4115	51.3122	28.6554	242.194	16.5484	26.4638	17.1853	15.6789	89.3932	18.9691	4.71257	49.4741	-2.21852	0.5365	-4.13518	3.54684e-05	0.000438298
Gm33049	26.5586	16.2489	33.4313	42.2286	13.6281	8.01933	1.71853	2.76686	29.6169	6.53321	4.53328	16.6002	-2.09711	0.507241	-4.13435	3.55957e-05	0.000441635
Ucp1	214.436	59.0091	140.093	204.933	298.845	497.198	744.123	860.493	154.618	600.165	0.257626	431.149	1.95807	0.473914	4.1317	3.60095e-05	0.000443567
ATP8	3.93461	3.42082	2.38795	0	7.78749	12.8309	34.3706	13.8343	2.43584	17.2058	0.141571	15.9162	2.69416	0.654619	4.11561	3.86151e-05	0.000475949
Lhx6	20.6567	21.3801	15.9197	14.9042	34.0703	48.116	37.8076	35.9692	18.2152	38.9908	0.467166	27.8629	1.09918	0.267852	4.10368	4.06622e-05	0.0004943
Susd3	1600.4	1352.08	1450.28	1709.02	683.352	635.933	945.191	584.73	1527.94	712.301	2.14508	953.909	-1.1028	0.268962	-4.10019	4.12804e-05	0.000500352
Defb42	22.624	39.3394	28.6554	28.5664	57.4327	56.9372	53.2744	77.4721	29.7963	61.2791	0.486239	42.7101	1.04165	0.254199	4.09777	4.17147e-05	0.000504133
Rad51c	119.022	146.24	89.9461	83.2152	49.6453	63.3527	32.6521	65.4823	109.606	52.7831	2.07653	69.0821	-1.02834	0.251131	-4.09482	4.22492e-05	0.000511923
Ugt2b5	49.1826	62.4299	45.371	78.2472	24.3359	22.4541	8.59265	27.6686	58.8077	20.7628	2.83236	48.9717	-1.44626	0.353375	-4.0927	4.26386e-05	0.000513204
Zfp114	13.7711	11.9729	8.75581	11.1782	36.0171	23.256	37.8076	23.0572	11.4195	30.0345	0.380212	19.5112	1.37225	0.335349	4.09199	4.2769e-05	0.000516326
Prkag3	338.376	255.706	247.551	351.491	167.431	171.614	65.3041	65.4823	298.281	117.458	2.53948	179.921	-1.33247	0.325945	-4.08803	4.35054e-05	0.000521175
Upk1b	77.7085	70.1267	96.3139	80.7312	123.626	141.942	216.535	172.468	81.2201	163.643	0.496326	123.514	0.999092	0.244508	4.08613	4.38621e-05	0.000528907
LOC108168933	238.044	297.611	226.855	494.323	190.794	145.15	61.867	130.042	314.208	131.963	2.38103	227.628	-1.23704	0.303321	-4.07832	4.53619e-05	0.000544912
LOC102635707	17.7057	17.9593	13.5317	17.3883	4.86718	4.00966	1.71853	5.53372	16.6462	4.03227	4.12825	12.3516	-1.95672	0.480329	-4.0737	4.62726e-05	0.000550985
Fcmr	2.95096	0	3.97992	7.45211	19.4687	12.8309	15.4668	18.4457	3.59575	16.553	0.217226	13.3976	2.29247	0.565205	4.05601	4.9919e-05	0.000592053
Gm34717	24.5913	44.4706	27.0634	33.5345	14.6015	11.2271	6.87412	13.8343	32.415	11.6343	2.78617	25.0479	-1.43277	0.353346	-4.05488	5.01601e-05	0.0005923
Adig	13.7711	11.1177	35.8192	19.8723	40.8843	62.5507	63.5856	57.1818	20.1451	56.0506	0.359409	44.0196	1.45975	0.360072	4.05405	5.03377e-05	0.00059318
Zscan18	27.5423	25.6561	23.8795	16.1462	44.7781	48.9179	48.1188	47.9589	23.306	47.4434	0.491238	35.1371	1.00643	0.248246	4.05417	5.03122e-05	0.000597079
Nek10	4.91826	3.42082	6.36786	1.24202	12.6547	20.8502	24.0594	22.1349	3.98724	19.9248	0.200114	13.2134	2.25498	0.556739	4.05034	5.11442e-05	0.000602564
Serpina6	1.9673	0	0.795983	2.48404	13.6281	7.21739	3.43706	21.2126	1.31183	11.3738	0.115338	7.57183	3.2874	0.812704	4.04501	5.23207e-05	0.000618445
Dnah3	94.4306	73.5475	66.0666	100.604	47.6984	38.4928	30.9335	42.4252	83.6621	39.8875	2.09745	54.7155	-1.04345	0.258323	-4.03933	5.3605e-05	0.000627006
Gm30145	28.5259	43.6154	35.8192	31.0505	8.76093	8.01933	10.3112	23.9794	34.7528	12.7677	2.72192	21.8368	-1.43587	0.355975	-4.03363	5.49224e-05	0.000641277
Doc2g	82.6268	91.5068	61.2907	163.946	42.8312	50.5218	15.4668	26.7463	99.8427	33.8915	2.94595	61.7006	-1.52046	0.37774	-4.02515	5.69389e-05	0.000676682
Otop1	19.673	5.13122	23.0835	21.1143	25.3093	52.9276	58.43	82.0835	17.2505	54.6876	0.315438	35.2846	1.67234	0.417908	4.00169	6.28912e-05	0.000723958
Scarna10	55.0845	120.584	156.809	173.883	368.932	217.324	517.277	1032.96	126.59	534.124	0.237005	343.647	2.07755	0.519681	3.99773	6.39519e-05	0.000731513
1810041L15Rik	95.4143	68.4163	64.4746	50.9228	146.015	188.454	108.267	121.742	69.807	141.12	0.494665	102.615	1.02086	0.256425	3.98113	6.85897e-05	0.000778888
Gm34590	86.5614	62.4299	51.7389	60.8589	42.8312	36.087	25.7779	24.9017	65.3973	32.3995	2.01847	46.8963	-0.988862	0.248628	-3.97727	6.97101e-05	0.000789323
Sptssb	52.1336	62.4299	66.8626	89.4253	125.573	125.903	199.349	178.924	67.7128	157.437	0.430094	101.349	1.21666	0.305933	3.97688	6.98252e-05	0.000793176
Mroh6	36.3951	33.353	38.2072	48.4387	22.389	16.8406	6.87412	14.7566	39.0985	15.2151	2.56972	26.5173	-1.29117	0.324922	-3.97378	7.07409e-05	0.000798501
Pak3	9.83652	12.8281	6.36786	16.1462	25.3093	42.5024	30.9335	29.5132	11.2947	32.0646	0.352247	26.4565	1.54441	0.389632	3.96376	7.37789e-05	0.000831396
Gsto2	21.6403	28.2217	23.8795	13.6622	51.5921	45.7102	48.1188	38.736	21.8509	46.0393	0.474615	31.8378	1.0406	0.262723	3.96081	7.46953e-05	0.000842719
Arsi	18.6894	14.5385	23.0835	21.1143	49.6453	36.8889	56.7115	43.3475	19.3564	46.6483	0.414944	30.4165	1.25416	0.317276	3.95288	7.72154e-05	0.000860735
Fam150b	3.93461	3.42082	0.795983	6.21009	16.5484	11.2271	13.7482	19.368	3.59038	15.2229	0.235853	8.9235	2.17534	0.550569	3.95108	7.78001e-05	0.00086755
Gm5820	198.698	241.168	196.608	421.044	146.015	100.242	106.549	144.799	264.379	124.401	2.12522	198.889	-1.08054	0.273782	-3.94671	7.92331e-05	0.000880188
Gm32767	8.85287	15.3937	6.36786	12.4202	2.92031	0.801933	0	0.922286	10.7586	1.16113	9.26565	6.06831	-3.08442	0.786764	-3.92039	8.84067e-05	0.000977379
Tmem132b	1.9673	1.71041	6.36786	3.72606	12.6547	12.8309	13.7482	20.2903	3.44291	14.881	0.231362	10.4708	2.09246	0.534341	3.91597	9.00419e-05	0.0009835
Bche	34.4278	38.4842	46.167	31.0505	60.353	99.4396	77.3338	76.5498	37.5324	78.4191	0.478613	65.2542	1.05603	0.269791	3.91427	9.06786e-05	0.000988806
Thrsp	406.248	201.828	612.111	253.372	681.405	938.261	792.242	923.209	368.39	833.779	0.441831	621.72	1.17712	0.300827	3.91294	9.11775e-05	0.000994758
Bdkrb2	13.7711	19.6697	10.3478	23.5984	36.0171	31.2754	42.9632	35.0469	16.8467	36.3257	0.46377	33.548	1.12039	0.286421	3.91167	9.16587e-05	0.00100456
LOC108168934	31.4769	32.4977	33.4313	17.3883	2.92031	13.6329	12.0297	8.30058	28.6985	9.22086	3.11235	16.8868	-1.66681	0.426994	-3.90359	9.47756e-05	0.00102721
Gm39078	65.9047	75.2579	79.5983	85.6993	45.7515	26.4638	51.5559	28.5909	76.6151	38.0905	2.01139	56.3301	-1.04411	0.267696	-3.90034	9.60563e-05	0.00104005
Gm31600	43.2807	48.7466	36.6152	52.1648	28.2297	19.2464	15.4668	21.2126	45.2018	21.0388	2.14849	29.8953	-1.06878	0.274272	-3.8968	9.74722e-05	0.00105114
Anxa8	27.5423	24.8009	21.4915	19.8723	36.0171	34.4831	70.4597	83.0058	23.4268	55.9914	0.418399	44.0791	1.23667	0.317632	3.8934	9.88499e-05	0.00107021
Faxc	7.86922	13.6833	10.3478	8.69413	28.2297	16.8406	30.9335	33.2023	10.1486	27.3015	0.371723	19.9114	1.38829	0.357125	3.88741	0.000101319	0.00108528
Amdhd2	1987.96	1770.27	1916.73	2043.12	1058.13	850.85	1149.7	704.627	1929.52	940.825	2.05088	1334.53	-1.03725	0.267372	-3.87941	0.00010471	0.00111732
ND4L	0.983652	2.56561	1.59197	2.48404	16.5484	11.2271	8.59265	8.30058	1.90632	11.1672	0.170707	8.5247	2.58341	0.665882	3.87969	0.000104589	0.00111732
Syn3	2141.41	1821.58	1909.56	2408.27	1352.1	1422.63	627.263	681.57	2070.21	1020.89	2.02784	1486.68	-1.01798	0.262632	-3.87606	0.000106163	0.00113047
Tlr5	4.91826	5.98643	7.95983	8.69413	17.5219	24.058	15.4668	21.2126	6.88966	19.5648	0.352146	15.335	1.54499	0.399116	3.87103	0.000108378	0.00115936
4931403E22Rik	53.1172	37.629	42.9831	86.9413	28.2297	26.4638	8.59265	14.7566	55.1676	19.5107	2.82756	36.2749	-1.43874	0.372059	-3.86697	0.000110195	0.00116709
Lgi2	10.8202	21.3801	18.3076	11.1782	37.964	40.0966	48.1188	25.824	15.4215	38.0009	0.40582	28.0233	1.25181	0.324077	3.86268	0.000112148	0.00119224
Cldn11	28.5259	29.0769	29.4514	18.6303	61.3265	54.5314	97.9562	65.4823	26.4211	69.8241	0.378395	49.0663	1.37634	0.358767	3.83631	0.000124896	0.00130189
Gabbr2	17.7057	19.6697	11.1438	11.1782	3.89375	4.00966	1.71853	2.76686	14.9243	3.0972	4.81866	8.27306	-2.20395	0.574571	-3.83582	0.000125146	0.00130203
Gm41812	4.91826	11.9729	5.57188	22.3563	28.2297	28.0676	27.4965	37.8137	11.2048	30.4019	0.368557	20.9141	1.50663	0.394341	3.82062	0.000133118	0.00139408
Agbl2	12.7875	14.5385	18.3076	21.1143	34.0703	28.0676	37.8076	49.8035	16.687	37.4373	0.445732	25.1981	1.17259	0.307636	3.81162	0.000138061	0.00142198
Gm35001	14.7548	23.0905	17.5116	23.5984	27.2562	36.8889	48.1188	56.2595	19.7388	42.1309	0.468512	30.0862	1.09041	0.286191	3.81008	0.000138922	0.00142198
Wbscr17	9.83652	9.40724	11.9397	14.9042	36.9906	39.2947	13.7482	23.0572	11.5219	28.2727	0.407529	19.5305	1.36019	0.357276	3.8071	0.000140605	0.00143908
Gm31106	22.624	19.6697	10.3478	19.8723	4.86718	3.20773	5.15559	8.30058	18.1284	5.38277	3.36787	12.7329	-1.74517	0.458453	-3.80666	0.000140859	0.00144066
Gm4952	175.09	250.575	187.852	96.8775	60.353	96.2319	63.5856	120.82	177.599	85.2475	2.08333	129.063	-1.05205	0.276398	-3.80627	0.000141079	0.00144553
Gm36676	5.90191	11.9729	4.7759	7.45211	27.2562	13.6329	25.7779	24.9017	7.52569	22.8922	0.328745	13.3643	1.58402	0.416266	3.80532	0.000141623	0.00144806
Prkar2b	258.701	213.801	323.169	226.047	317.34	511.633	580.863	715.694	255.429	531.383	0.480688	459.362	1.05519	0.277413	3.8037	0.000142552	0.00145231
Nat8l	41.3134	23.9457	58.1068	39.7446	72.0343	107.459	106.549	106.985	40.7776	98.2568	0.415011	76.5387	1.26467	0.332579	3.8026	0.000143183	0.00146018
Gm33260	20.6567	19.6697	11.9397	27.3244	41.8578	35.285	39.5262	45.192	19.8976	40.4653	0.491722	36.3778	1.05922	0.278642	3.80134	0.000143913	0.00146351
LOC102639076	15.7384	17.9593	40.5951	57.1329	7.78749	8.01933	3.43706	2.76686	32.8564	5.50268	5.97098	19.2417	-2.53486	0.668507	-3.79182	0.000149546	0.0015151
Kcna6	22.624	21.3801	15.9197	29.8084	36.0171	39.2947	58.43	54.4149	22.4331	47.0392	0.476901	34.4989	1.07358	0.283275	3.78987	0.000150724	0.00152669
Lmod3	9.83652	4.27602	16.7156	6.21009	24.3359	22.4541	48.1188	19.368	9.25957	28.5692	0.32411	19.3987	1.54128	0.407725	3.7802	0.000156702	0.00157669
Gm41668	117.055	101.769	116.214	286.906	76.9015	81.7971	34.3706	57.1818	155.486	62.5627	2.48528	121.415	-1.28919	0.342328	-3.76594	0.000165921	0.00165633
Vmn1r19	21.6403	46.181	23.8795	185.061	20.4422	17.6425	3.43706	17.5234	69.1904	14.7613	4.68729	35.8962	-2.18013	0.579054	-3.76498	0.00016656	0.00166404
Cmya5	23.6077	26.5113	21.4915	43.4707	70.0874	49.7198	54.9929	57.1818	28.7703	57.9955	0.496078	44.6187	1.04008	0.276483	3.76183	0.000168678	0.00168079
Endog	119.022	107.756	167.952	132.896	73.9812	52.1256	75.6153	46.1143	131.907	61.9591	2.12893	83.1041	-1.10398	0.293848	-3.75696	0.000171989	0.00171095
4831440D22Rik	26.5586	32.4977	26.2674	67.069	18.4953	14.4348	8.59265	14.7566	38.0982	14.0698	2.70779	28.7668	-1.37426	0.366168	-3.75308	0.000174676	0.00173285
Gm39813	21.6403	20.5249	29.4514	14.9042	5.84062	1.60387	10.3112	9.22286	21.6302	6.74463	3.20703	15.338	-1.78664	0.478027	-3.73752	0.000185845	0.00183497
Brsk1	26.5586	16.2489	23.8795	14.9042	55.4859	44.1063	46.4003	29.5132	20.3978	43.8764	0.464892	34.6808	1.08611	0.290983	3.73255	0.000189555	0.00186255
Gm32320	1.9673	3.42082	3.97992	6.21009	11.6812	14.4348	6.87412	26.7463	3.89453	14.9341	0.260781	10.4409	2.01947	0.542182	3.72472	0.000195536	0.00190717
Gm20616	12.7875	23.0905	20.6956	77.0052	9.73436	8.82126	6.87412	6.45601	33.3947	7.97144	4.18929	17.9626	-2.03371	0.547693	-3.71323	0.000204635	0.00199053
Ptprq	7.86922	15.3937	8.75581	12.4202	2.92031	1.60387	0	1.84457	11.1097	1.59219	6.97765	7.50174	-2.66324	0.717555	-3.71155	0.000205991	0.00199266
Glrb	2.95096	3.42082	3.97992	2.48404	10.7078	12.8309	15.4668	19.368	3.20893	14.5934	0.21989	12.2978	2.15344	0.580259	3.71117	0.000206301	0.00199387
Fbxw10	14.7548	5.13122	6.36786	3.72606	30.1765	14.4348	18.9038	24.9017	7.49498	22.1042	0.339075	16.9885	1.55621	0.420136	3.70406	0.000212173	0.00204158
Gm20594	29.5096	14.5385	32.6353	13.6622	39.9109	32.8792	79.0523	85.7726	22.5864	59.4038	0.380218	51.7017	1.36547	0.368921	3.70126	0.000214529	0.00206367
Gm33051	20.6567	20.5249	27.0634	17.3883	46.7249	53.7295	46.4003	40.5806	21.4083	46.8588	0.456868	31.344	1.11773	0.302201	3.69863	0.000216769	0.00207376
Dhrsx	371.82	246.299	378.092	243.436	155.75	133.121	182.164	131.887	309.912	150.73	2.05607	212.327	-1.04633	0.283274	-3.6937	0.000221014	0.00212111
Gm39347	9.83652	9.40724	7.16385	9.93615	34.0703	21.6522	12.0297	28.5909	9.08594	24.0858	0.377233	16.5768	1.45655	0.395128	3.68627	0.000227564	0.00217565
Greb1	13.7711	13.6833	11.9397	23.5984	72.0343	61.7488	36.0891	40.5806	15.7481	52.6132	0.299319	33.4409	1.7662	0.479551	3.68302	0.000230489	0.0021994
Sstr3	0	3.42082	1.59197	1.24202	9.73436	20.8502	8.59265	6.45601	1.5637	11.4083	0.137067	6.52109	2.83991	0.771273	3.68211	0.000231311	0.00220255
Krt5	68.8556	59.0091	63.6786	44.7127	122.653	101.044	204.505	80.2389	59.064	127.11	0.464668	86.6401	1.08284	0.294646	3.67505	0.000237801	0.00226663
Nipal1	44.2643	45.3258	48.555	60.8589	81.7686	64.9565	147.794	132.809	49.751	106.832	0.465694	82.5201	1.09439	0.298447	3.66696	0.000245447	0.00231554
Hebp2	28.5259	47.8914	43.7791	24.8404	53.539	80.1933	80.7709	83.9281	36.2592	74.6078	0.485997	58.569	1.01938	0.278019	3.66658	0.000245819	0.00232786
LOC108167420	29.5096	19.6697	26.2674	28.5664	49.6453	52.9276	65.3041	69.1715	26.0033	59.2621	0.438784	43.4237	1.18979	0.32507	3.66011	0.000252104	0.00237548
4933427E11Rik	5.90191	3.42082	6.36786	6.21009	15.575	14.4348	34.3706	21.2126	5.47517	21.3982	0.25587	13.3069	1.93662	0.529719	3.65594	0.00025624	0.00241061
Adm2	24.5913	12.8281	30.2474	28.5664	56.4593	62.5507	42.9632	45.192	24.0583	51.7913	0.464523	38.8842	1.12641	0.308488	3.65138	0.000260836	0.00243932
Slc22a3	14.7548	13.6833	27.0634	21.1143	24.3359	58.5411	68.7412	35.9692	19.1539	46.8968	0.408427	35.7814	1.26739	0.346831	3.65419	0.00025799	0.00243932
Gm10790	4.91826	2.56561	7.16385	12.4202	18.4953	18.4444	25.7779	19.368	6.76698	20.5214	0.329752	15.028	1.63682	0.448414	3.65024	0.000261991	0.00246799
Gm35165	141.646	148.805	134.521	336.587	111.945	85.0049	72.1782	62.7155	190.39	82.9609	2.29493	133.917	-1.18966	0.326314	-3.64574	0.000266622	0.00248933
Clstn3	30.4932	22.2353	50.1469	39.7446	57.4327	74.5797	77.3338	78.3944	35.655	71.9352	0.495655	57.043	1.00923	0.276885	3.64495	0.000267449	0.00249425
3300005D01Rik	21.6403	28.2217	24.6755	19.8723	7.78749	7.21739	12.0297	7.37829	23.6025	8.60322	2.74345	13.7237	-1.52039	0.418353	-3.63423	0.000278814	0.00258659
Tmem100	16.7221	20.5249	21.4915	16.1462	37.964	41.7005	51.5559	42.4252	18.7212	43.4114	0.431251	33.1578	1.18901	0.327182	3.63408	0.000278973	0.00258946
Khdrbs2	10.8202	11.9729	7.16385	11.1782	0	1.60387	0	0	10.2838	0.400966	25.6474	4.4439	-4.32868	1.1913	-3.63357	0.000279521	0.0025998
LOC108168893	0	3.42082	0	0	10.7078	3.20773	6.87412	22.1349	0.855204	10.7311	0.0796937	6.21496	3.5527	0.980389	3.62376	0.000290349	0.00268787
Gm36231	17.7057	17.9593	10.3478	31.0505	35.0437	42.5024	41.2447	44.2698	19.2658	40.7651	0.472605	29.7045	1.12621	0.31091	3.62229	0.000292006	0.00269369
Gm20684	4.91826	11.1177	11.1438	12.4202	23.3625	20.8502	20.6223	33.2023	9.89996	24.5093	0.403926	19.5202	1.32309	0.365941	3.6156	0.000299658	0.0027933
LOC108167438	44.2643	64.1403	35.0233	130.412	25.3093	27.2657	13.7482	28.5909	68.46	23.7285	2.88513	48.3822	-1.4906	0.413357	-3.60608	0.000310863	0.0028498
Tmem182	22.624	30.7873	27.0634	9.93615	42.8312	50.5218	42.9632	47.0366	22.6027	45.8382	0.493098	38.5774	0.987644	0.274377	3.59958	0.000318728	0.00291647
Calml3	36.3951	29.9321	35.0233	33.5345	67.1671	40.8986	99.6747	87.6172	33.7213	73.8394	0.456684	46.9212	1.11326	0.310699	3.58309	0.000339553	0.00307364
Rdh12	13.7711	12.8281	26.2674	16.1462	38.9375	37.6908	29.215	38.736	17.2532	36.1448	0.477336	23.7718	1.06668	0.298016	3.57926	0.000344565	0.00312182
Fam131c	43.2807	36.7738	41.3911	50.9228	16.5484	23.256	24.0594	16.6012	43.0921	20.1163	2.14215	30.9932	-1.10734	0.309701	-3.57552	0.00034953	0.00317285
Rbp4	31.4769	43.6154	66.0666	27.3244	52.5656	170.01	101.393	65.4823	42.1208	97.3627	0.432618	75.7656	1.19711	0.334982	3.57367	0.000352018	0.00317311
Ngfr	60.0028	39.3394	43.7791	59.6169	111.945	69.7681	183.883	67.3269	50.6845	108.231	0.468301	77.0182	1.07851	0.30214	3.56957	0.000357561	0.0032154
2610035D17Rik	142.63	117.163	200.588	117.992	287.164	356.058	317.928	220.426	144.593	295.394	0.489492	232.885	1.0272	0.28801	3.56655	0.000361706	0.0032484
Dnajb3	20.6567	10.2624	16.7156	19.8723	50.6187	48.9179	20.6223	43.3475	16.8768	40.8766	0.412871	29.7192	1.31762	0.370737	3.55406	0.000379339	0.0033825
Tmem28	38.3624	60.7195	32.6353	62.1009	19.4687	29.6715	8.59265	12.912	48.4545	17.6612	2.74356	27.759	-1.39939	0.393862	-3.55301	0.000380852	0.00341152
Cfd	462.316	176.172	644.746	357.701	736.891	1300.73	1990.06	827.291	410.234	1213.74	0.337991	1353.82	1.56386	0.440354	3.55138	0.000383224	0.00342546
Gm41286	3.93461	6.84163	4.7759	3.72606	10.7078	12.8309	24.0594	21.2126	4.81955	17.2027	0.280163	10.1335	1.77569	0.50099	3.54437	0.000393559	0.00351412
Pcdhb12	5.90191	13.6833	12.7357	11.1782	30.1765	28.8696	24.0594	26.7463	10.8748	27.463	0.39598	20.7985	1.33373	0.377141	3.53642	0.000405588	0.00358611
Gm42035	29.5096	51.3122	42.1871	63.3429	20.4422	20.8502	12.0297	11.0674	46.588	16.0974	2.89413	34.8202	-1.50594	0.426016	-3.53495	0.000407852	0.00360081
Gm26744	52.1336	38.4842	35.0233	95.6354	26.2828	23.256	15.4668	19.368	55.3191	21.0934	2.62258	36.6221	-1.35582	0.383913	-3.53158	0.000413085	0.0036403
Gm41269	2.95096	3.42082	6.36786	2.48404	15.575	11.2271	18.9038	14.7566	3.80592	15.1156	0.251787	10.8682	1.91537	0.542432	3.53108	0.000413867	0.00364525
Gm31278	3.93461	3.42082	1.59197	4.96807	12.6547	12.029	15.4668	11.0674	3.47887	12.8045	0.271692	8.46342	1.91529	0.543226	3.52577	0.000422247	0.00370207
Gpr84	0.983652	3.42082	1.59197	1.24202	10.7078	8.82126	13.7482	7.37829	1.80961	10.1639	0.178043	5.84464	2.40548	0.684119	3.51618	0.000437809	0.00383334
Tnfaip8l3	1.9673	1.71041	6.36786	6.21009	13.6281	12.8309	12.0297	19.368	4.06392	14.4642	0.280964	13.5153	1.86324	0.530038	3.51529	0.000439279	0.00384327
Selp	1.9673	2.56561	3.97992	1.24202	8.76093	12.029	6.87412	18.4457	2.43871	11.5274	0.211557	8.24987	2.21446	0.63166	3.50578	0.000455276	0.00395737
Cacna1i	2.95096	0.855204	3.18393	2.48404	9.73436	16.8406	12.0297	19.368	2.36853	14.4932	0.163424	8.35309	2.62969	0.750243	3.50511	0.000456415	0.00398436
Cym	35.4115	43.6154	36.6152	45.9547	25.3093	16.8406	17.1853	20.2903	40.3992	19.9064	2.02946	28.4824	-1.0065	0.287448	-3.50149	0.000462661	0.00401377
Gm37125	14.7548	15.3937	8.75581	4.96807	23.3625	22.4541	29.215	30.4355	10.9681	26.3668	0.415982	17.4222	1.22323	0.349932	3.49563	0.000472939	0.0040763
1700112D23Rik	9.83652	16.2489	3.18393	12.4202	0	0.801933	1.71853	2.76686	10.4224	1.32183	7.88481	4.71361	-3.0158	0.8644	-3.48889	0.000485025	0.00416046
Lipc	0.983652	1.71041	3.97992	7.45211	7.78749	10.4251	17.1853	20.2903	3.53152	13.9221	0.253664	8.67826	2.02955	0.58291	3.48175	0.000498142	0.00426493
Gm34298	15.7384	29.9321	23.8795	33.5345	37.964	47.314	75.6153	50.7258	25.7711	52.9048	0.487123	44.3908	1.01852	0.293134	3.47459	0.000511638	0.00436316
Gm10638	24.5913	17.1041	20.6956	29.8084	9.73436	11.2271	5.15559	10.1452	23.0498	9.06554	2.54258	16.3771	-1.25867	0.36326	-3.46493	0.000530367	0.00449916
Bmp15	13.7711	17.1041	22.2875	18.6303	39.9109	36.087	37.8076	33.2023	17.9483	36.752	0.488362	26.6411	1.02317	0.295795	3.45904	0.000542097	0.00460111
Gm10419	4.91826	2.56561	3.97992	3.72606	18.4953	12.8309	12.0297	11.0674	3.79746	13.6058	0.279105	8.37673	1.85583	0.537068	3.4555	0.000549283	0.00463335
Gm36003	22.624	21.3801	11.1438	27.3244	11.6812	1.60387	6.87412	5.53372	20.6181	6.42323	3.20992	14.2981	-1.70617	0.493775	-3.45536	0.000549567	0.00463763
Gm30173	10.8202	14.5385	12.7357	18.6303	2.92031	2.4058	6.87412	5.53372	14.1812	4.43349	3.19865	10.9971	-1.76159	0.51002	-3.45396	0.000552424	0.00464719
Gm33934	91.4796	132.557	132.133	311.747	97.3436	86.6087	53.2744	54.4149	166.979	72.9104	2.29019	114.394	-1.18094	0.342515	-3.44785	0.000565071	0.0047412
Hist1h4b	85.5777	53.0226	85.9662	57.1329	31.15	25.6618	25.7779	29.5132	70.4248	28.0257	2.51286	38.1823	-1.32823	0.385499	-3.44549	0.000570028	0.00478188
Gm41932	16.7221	21.3801	20.6956	2.48404	3.89375	1.60387	1.71853	5.53372	15.3204	3.18746	4.80647	8.07975	-2.25125	0.653759	-3.44355	0.000574128	0.00483758
Bcat1	3771.32	4562.51	2795.49	3476.41	1657.76	421.015	2615.6	1073.54	3651.43	1441.98	2.53224	2497.82	-1.34167	0.391539	-3.42665	0.000611085	0.00505986
Caps2	2.95096	6.84163	4.7759	8.69413	15.575	11.2271	25.7779	19.368	5.81565	17.987	0.323325	12.3271	1.61283	0.471264	3.42234	0.000620848	0.00511551
Galnt6	47.2153	41.0498	35.0233	27.3244	23.3625	19.2464	22.3409	9.22286	37.6532	18.5431	2.03057	36.5184	-1.05553	0.30871	-3.41918	0.000628106	0.0051656
Gm42357	35.4115	45.3258	24.6755	43.4707	22.389	12.8309	8.59265	14.7566	37.2209	14.6423	2.54201	26.568	-1.30639	0.382304	-3.41717	0.000632767	0.00518582
Sult6b1	4.91826	5.98643	3.97992	6.21009	18.4953	18.4444	15.4668	14.7566	5.27367	16.7908	0.314082	10.8966	1.69465	0.496505	3.41316	0.000642142	0.0052719
Gucy2g	20.6567	25.6561	17.5116	34.7765	44.7781	37.6908	73.8968	51.648	24.6502	52.0034	0.474012	36.4538	1.07041	0.314195	3.40684	0.000657208	0.00536014
Apoc1	26.5586	9.40724	39.7992	22.3563	29.2031	48.116	56.7115	87.6172	24.5303	55.4119	0.44269	59.519	1.16771	0.343235	3.40206	0.000668788	0.00547452
Angptl1	54.1009	47.0362	48.555	50.9228	36.0171	30.4734	13.7482	15.6789	50.1537	23.9794	2.09153	39.3939	-1.01988	0.299993	-3.39969	0.000674615	0.00548884
Lpo	7.86922	2.56561	0.795983	3.72606	7.78749	11.2271	20.6223	16.6012	3.73922	14.0595	0.265956	8.71306	1.92219	0.566158	3.39515	0.000685922	0.00554964
Tal2	11.8038	8.55204	6.36786	3.72606	14.6015	16.8406	25.7779	25.824	7.61245	20.761	0.36667	15.7676	1.40219	0.413144	3.39395	0.00068891	0.00558752
Mrgprf	19.673	14.5385	12.7357	29.8084	43.8046	44.1063	34.3706	33.2023	19.1889	38.871	0.493657	34.7797	1.06917	0.315611	3.38762	0.000705018	0.00569101
Calca	14.7548	19.6697	20.6956	14.9042	36.9906	40.8986	18.9038	55.3372	17.5061	38.0325	0.460292	26.4866	1.14006	0.337369	3.37927	0.000726799	0.00588499
Aqp8	7.86922	7.69684	12.7357	3.72606	21.4156	28.0676	22.3409	16.6012	8.00696	22.1063	0.362202	17.8938	1.42043	0.420983	3.37407	0.000740651	0.00594844
Adcy2	4.91826	9.40724	12.7357	16.1462	22.389	32.0773	18.9038	28.5909	10.8019	25.4903	0.423765	19.3715	1.28345	0.380756	3.3708	0.00074949	0.00600112
Gm15326	3.93461	3.42082	3.97992	1.24202	10.7078	8.01933	12.0297	17.5234	3.14434	12.0701	0.260507	7.84433	1.88288	0.558784	3.3696	0.000752771	0.00601577
Gm41414	9.83652	7.69684	12.7357	9.93615	31.15	28.0676	10.3112	22.1349	10.0513	22.9159	0.438617	16.0429	1.2367	0.36774	3.36297	0.000771101	0.00616275
Gm32657	42.297	35.9186	13.5317	70.7951	12.6547	20.0483	12.0297	10.1452	40.6356	13.7195	2.96189	23.2724	-1.53206	0.45627	-3.35779	0.000785676	0.00624404
F630042J09Rik	19.673	7.69684	8.75581	8.69413	31.15	22.4541	27.4965	23.9794	11.205	26.27	0.426531	17.7106	1.22928	0.367314	3.34669	0.000817836	0.00645843
Rxrg	18.6894	19.6697	14.3277	9.93615	24.3359	52.9276	36.0891	27.6686	15.6557	35.2553	0.444068	23.1172	1.16093	0.346891	3.34666	0.000817926	0.00647955
Gm32618	5.90191	4.27602	3.97992	7.45211	17.5219	10.4251	25.7779	14.7566	5.40249	17.1204	0.315559	12.0621	1.65201	0.493811	3.34544	0.000821524	0.00649134
Bmp5	13.7711	22.2353	17.5116	17.3883	30.1765	28.0676	54.9929	49.8035	17.7266	40.7601	0.4349	29.1231	1.17175	0.351059	3.33776	0.000844559	0.00665055
Cdca5	9.83652	4.27602	7.16385	1.24202	17.5219	17.6425	24.0594	12.912	5.6296	18.0339	0.312167	12.6309	1.6099	0.484071	3.32576	0.000881793	0.00688922
Gm35065	1.9673	1.71041	3.97992	3.72606	8.76093	11.2271	8.59265	15.6789	2.84592	11.0649	0.257203	6.95777	1.99179	0.59891	3.32568	0.000882027	0.00689729
Gm4665	19.673	13.6833	11.1438	32.2925	5.84062	6.41546	1.71853	5.53372	19.1981	4.87708	3.9364	12.5253	-1.87326	0.563443	-3.32467	0.00088523	0.00690428
Cebpd	25.575	29.0769	52.5349	65.827	109.025	143.546	101.393	42.4252	43.2534	99.0973	0.436474	63.0426	1.20526	0.362974	3.32052	0.000898497	0.0070008
Gm30729	3.93461	4.27602	2.38795	2.48404	13.6281	11.2271	5.15559	14.7566	3.27065	11.1918	0.292236	8.51348	1.81932	0.548597	3.31631	0.000912152	0.00709855
Acss2os	31.4769	34.2082	27.0634	55.8908	18.4953	21.6522	8.59265	14.7566	37.1598	15.8742	2.3409	23.8024	-1.15555	0.352432	-3.27879	0.00104254	0.00796825
Adam28	2.95096	5.13122	7.95983	11.1782	19.4687	16.8406	20.6223	16.6012	6.80504	18.3832	0.370177	10.8701	1.45252	0.443763	3.2732	0.00106336	0.00809414
Capn13	12.7875	25.6561	18.3076	23.5984	38.9375	27.2657	48.1188	54.4149	20.0874	42.1842	0.476183	28.8673	1.05993	0.324619	3.26515	0.00109405	0.00829116
Gm32878	13.7711	12.8281	11.9397	4.96807	3.89375	2.4058	0	1.84457	10.8768	2.03603	5.34214	7.18297	-2.30543	0.706065	-3.26518	0.00109393	0.00834355
Ism1	15.7384	15.3937	19.1036	17.3883	24.3359	41.7005	37.8076	32.28	16.906	34.031	0.496782	25.7242	1.00396	0.308306	3.25639	0.00112838	0.00854683
5330416C01Rik	5.90191	5.98643	3.18393	9.93615	13.6281	19.2464	18.9038	15.6789	6.25211	16.8643	0.37073	10.9989	1.48167	0.455581	3.25226	0.00114492	0.00868229
Gm39908	44.2643	48.7466	22.2875	88.1833	25.3093	24.058	10.3112	15.6789	50.8705	18.8393	2.70022	36.7811	-1.38728	0.427822	-3.24264	0.00118426	0.0089059
Pabpc1l	5.90191	0.855204	3.18393	4.96807	9.73436	10.4251	10.3112	21.2126	3.72728	12.9208	0.288471	7.85024	1.85974	0.573783	3.24119	0.0011903	0.00893812
Gm31037	9.83652	9.40724	13.5317	16.1462	3.89375	4.8116	1.71853	1.84457	12.2304	3.06711	3.98761	7.57062	-1.90442	0.587738	-3.24025	0.00119426	0.00894106
Gm17750	28.5259	72.6923	83.5782	70.7951	122.653	72.9759	170.134	163.245	63.8979	132.252	0.483153	105.822	1.03883	0.320831	3.23795	0.00120393	0.00900226
Syt2	8.85287	4.27602	4.7759	3.72606	23.3625	10.4251	24.0594	15.6789	5.40771	18.3815	0.294194	11.58	1.73472	0.535906	3.23698	0.00120801	0.00903323
Gm35279	27.5423	30.7873	21.4915	24.8404	5.84062	14.4348	12.0297	9.22286	26.1654	10.382	2.52027	21.4838	-1.33708	0.413132	-3.23645	0.00121026	0.00906747
Ccdc18	13.7711	10.2624	7.16385	7.45211	21.4156	17.6425	32.6521	23.0572	9.66238	23.6918	0.407836	17.6838	1.25457	0.388292	3.23101	0.00123355	0.0092564
Defb19	19.673	36.7738	31.8393	28.5664	9.73436	12.029	15.4668	17.5234	29.2131	13.6884	2.13415	18.2022	-1.11728	0.347117	-3.21873	0.00128759	0.00955805
Gm31279	22.624	27.3665	24.6755	17.3883	12.6547	8.01933	12.0297	9.22286	23.0136	10.4816	2.19561	17.2021	-1.18004	0.366698	-3.21802	0.00129079	0.00962199
Ucp3	18.6894	10.2624	20.6956	21.1143	22.389	32.8792	39.5262	61.7932	17.6904	39.1469	0.451898	32.5758	1.15541	0.359506	3.21389	0.0013095	0.00969562
Gpr173	10.8202	5.98643	8.75581	4.96807	20.4422	16.0387	20.6223	18.4457	7.63262	18.8872	0.404116	12.3236	1.27431	0.396818	3.21131	0.00132131	0.00975376
Gm32800	40.3297	63.2851	113.03	45.9547	22.389	15.2367	32.6521	41.5029	65.6498	27.9452	2.34923	43.2194	-1.25471	0.390812	-3.21052	0.00132496	0.00980084
Pygo1	9.83652	4.27602	11.1438	6.21009	19.4687	27.2657	15.4668	14.7566	7.8666	19.2394	0.408879	13.6533	1.30136	0.407287	3.1952	0.00139735	0.0102672
Scarna6	108.202	182.158	301.678	365.153	496.453	340.821	653.041	908.452	239.298	599.692	0.399035	442.223	1.32605	0.415261	3.19329	0.00140659	0.0103152
Gm32661	3.93461	6.84163	7.95983	14.9042	20.4422	18.4444	22.3409	20.2903	8.41007	20.3794	0.412674	13.9244	1.31245	0.41351	3.17394	0.00150387	0.0108548
Gm31683	102.3	153.937	111.438	340.313	96.3702	72.9759	61.867	61.7932	176.997	73.2516	2.41629	118.016	-1.26515	0.398782	-3.17254	0.00151111	0.0108807
8430426J06Rik	15.7384	21.3801	9.5518	18.6303	4.86718	3.20773	0	7.37829	16.3252	3.8633	4.2257	8.81394	-1.96703	0.621411	-3.16542	0.00154857	0.0111232
Oip5	24.5913	33.353	16.7156	26.0824	10.7078	11.2271	8.59265	13.8343	25.1856	11.0904	2.27092	21.0796	-1.14938	0.363272	-3.16398	0.00155629	0.0111784
Wnt2	4.91826	8.55204	11.9397	13.6622	10.7078	30.4734	25.7779	31.3577	9.76806	24.5792	0.397411	17.6006	1.3454	0.425508	3.16185	0.00156768	0.0111993
Hist2h3c1	15.7384	18.8145	9.5518	9.93615	2.92031	2.4058	5.15559	3.68915	13.5102	3.54271	3.81353	5.89862	-2.00542	0.635195	-3.15718	0.00159304	0.0113342
Spata20	2.95096	2.56561	3.97992	4.96807	13.6281	4.00966	18.9038	23.9794	3.61614	15.1303	0.239	8.22504	2.06383	0.653662	3.15734	0.00159217	0.0113342
Hist1h2ac	46.2316	31.6425	17.5116	31.0505	12.6547	15.2367	3.43706	8.30058	31.6091	9.90726	3.1905	14.3187	-1.60883	0.509739	-3.15619	0.00159845	0.0113606
Col17a1	10.8202	8.55204	11.1438	29.8084	32.1234	28.8696	24.0594	77.4721	15.0811	40.6311	0.371171	28.5942	1.47926	0.468867	3.15497	0.00160514	0.0113911
Fgf7	7.86922	5.98643	3.18393	3.72606	11.6812	13.6329	15.4668	18.4457	5.19141	14.8066	0.350613	10.5626	1.50765	0.478959	3.14777	0.00164521	0.0116442
C730036E19Rik	220.338	260.837	226.059	458.305	213.183	155.575	67.0226	134.654	291.385	142.608	2.04325	207.646	-1.01873	0.324242	-3.14189	0.00167863	0.0118598
LOC105247125	19.673	29.0769	18.3076	74.5211	14.6015	13.6329	8.59265	12.912	35.3947	12.4348	2.84643	27.2069	-1.46077	0.465096	-3.14078	0.00168496	0.0118676
Gm9949	15.7384	29.9321	28.6554	23.5984	7.78749	8.01933	12.0297	14.7566	24.4811	10.6483	2.29906	16.5976	-1.22978	0.392962	-3.12952	0.00175093	0.012235
A330040F15Rik	161.319	108.611	166.36	216.111	117.786	83.401	63.5856	45.192	163.1	77.4911	2.10476	111.715	-1.06641	0.340845	-3.12872	0.00175572	0.012255
LOC102632541	21.6403	23.0905	24.6755	43.4707	11.6812	16.0387	6.87412	11.9897	28.2192	11.6459	2.4231	22.1634	-1.20266	0.387048	-3.10727	0.00188821	0.0130433
Atf7ip2	14.7548	27.3665	15.9197	26.0824	51.5921	36.087	29.215	54.4149	21.0308	42.8272	0.491062	32.3466	1.0513	0.339737	3.09445	0.0019718	0.0135296
Clec3b	16.7221	9.40724	15.1237	6.21009	37.964	37.6908	24.0594	14.7566	11.8658	28.6177	0.41463	22.8904	1.26035	0.407654	3.09172	0.00199003	0.0136501
Gm14161	7.86922	7.69684	2.38795	4.96807	14.6015	12.029	17.1853	18.4457	5.73052	15.5654	0.368158	9.53137	1.43839	0.466545	3.08308	0.00204872	0.0139336
Cxcl1	18.6894	17.9593	23.0835	47.1967	17.5219	5.61353	6.87412	11.0674	26.7322	10.2692	2.60314	18.2283	-1.33903	0.434889	-3.07902	0.00207682	0.0140986
Capsl	11.8038	5.98643	7.95983	4.96807	18.4953	18.4444	15.4668	20.2903	7.67954	18.1742	0.422552	12.484	1.2455	0.404719	3.07745	0.00208779	0.0141311
Gm40523	8.85287	4.27602	8.75581	7.45211	17.5219	16.8406	18.9038	16.6012	7.3342	17.4669	0.419893	11.6192	1.247	0.405198	3.07751	0.00208736	0.0141844
Ip6k3	19.673	10.2624	13.5317	9.93615	22.389	28.8696	32.6521	23.9794	13.3508	26.9725	0.494979	19.1019	0.989395	0.322505	3.06785	0.00215606	0.0145315
Gm33472	23.6077	13.6833	11.1438	6.21009	30.1765	28.0676	20.6223	39.6583	13.6612	29.6312	0.461041	19.7138	1.12356	0.36647	3.06591	0.00217012	0.0145871
4930432K21Rik	12.7875	16.2489	13.5317	21.1143	31.15	27.2657	54.9929	34.1246	15.9206	36.8833	0.431648	25.8194	1.19722	0.391091	3.06124	0.00220422	0.0147684
Boll	9.83652	14.5385	11.9397	14.9042	5.84062	4.8116	0	3.68915	12.8047	3.58534	3.57142	8.64136	-1.69443	0.553862	-3.0593	0.00221852	0.0148661
Smpx	3.93461	15.3937	7.95983	4.96807	13.6281	24.058	22.3409	23.9794	8.06405	21.0016	0.383973	14.6554	1.34023	0.438531	3.05617	0.00224183	0.0149697
Gm36440	4.91826	4.27602	4.7759	3.72606	10.7078	12.8309	18.9038	11.0674	4.42406	13.3775	0.330709	9.1774	1.54288	0.504877	3.05595	0.00224349	0.0149756
St8sia2	1.9673	4.27602	2.38795	6.21009	15.575	11.2271	6.87412	14.7566	3.71034	12.1082	0.306433	8.33785	1.78664	0.584701	3.05565	0.00224576	0.0151619
1700095J12Rik	15.7384	12.8281	15.9197	47.1967	8.76093	8.01933	5.15559	7.37829	22.9207	7.32853	3.1276	14.1973	-1.58574	0.519671	-3.05143	0.00227757	0.015214
Asic2	12.7875	8.55204	11.9397	4.96807	19.4687	26.4638	25.7779	16.6012	9.56183	22.0779	0.433095	18.1232	1.16528	0.382233	3.0486	0.00229912	0.0153392
Gm36372	23.6077	20.5249	22.2875	7.45211	43.8046	39.2947	27.4965	37.8137	18.468	37.1024	0.497759	28.1639	0.99348	0.326317	3.04453	0.00233048	0.0155122
Glis1	189.845	135.977	207.752	389.994	94.4233	113.874	70.4597	39.6583	230.892	79.6039	2.90051	145.763	-1.53227	0.504521	-3.03709	0.00238878	0.0158266
Gm35137	25.575	17.1041	21.4915	48.4387	12.6547	10.4251	15.4668	11.0674	28.1523	12.4035	2.26971	19.2353	-1.18506	0.390585	-3.03406	0.00241287	0.0159609
1110046J04Rik	2.95096	5.98643	9.5518	4.96807	22.389	12.8309	18.9038	13.8343	5.86431	16.9895	0.345172	9.63327	1.48455	0.490174	3.02862	0.00245676	0.0162432
1700125H03Rik	22.624	11.9729	14.3277	12.4202	0.973436	4.8116	8.59265	5.53372	15.3362	4.97785	3.08089	9.42332	-1.70777	0.565616	-3.01931	0.00253349	0.016632
Esr2	3.93461	9.40724	5.57188	3.72606	10.7078	13.6329	12.0297	26.7463	5.65995	15.7792	0.358697	15.3448	1.46396	0.484964	3.01869	0.00253868	0.0166579
Neto2	12.7875	12.8281	10.3478	8.69413	24.3359	28.0676	17.1853	24.9017	11.1644	23.6226	0.472613	17.6156	1.09814	0.367943	2.98454	0.00284004	0.0184117
Gdf15	44.2643	30.7873	52.5349	43.4707	16.5484	24.058	29.215	10.1452	42.7643	19.9916	2.13911	26.8491	-1.13107	0.379447	-2.98084	0.00287457	0.0185063
Nalcn	31.4769	50.457	31.0433	19.8723	14.6015	16.8406	17.1853	14.7566	33.2124	15.846	2.09595	27.4632	-1.08893	0.365857	-2.97639	0.00291665	0.0186877
Gm36418	8.85287	6.84163	7.95983	14.9042	12.6547	23.256	20.6223	23.9794	9.63964	20.1281	0.478914	16.5351	1.11324	0.375315	2.96613	0.0030157	0.0192672
Gm5475	19.673	12.8281	15.1237	12.4202	21.4156	32.0773	46.4003	22.1349	15.0112	30.507	0.492059	23.4887	0.974004	0.328476	2.96522	0.00302464	0.0193041
Gm12701	74.7576	110.321	70.8425	190.029	76.9015	54.5314	24.0594	47.0366	111.488	50.6322	2.20191	79.8683	-1.11404	0.37618	-2.96146	0.0030618	0.019436
Col11a1	9.83652	16.2489	11.9397	12.4202	27.2562	27.2657	24.0594	23.0572	12.6113	25.4096	0.496321	17.4535	1.00997	0.341495	2.95749	0.00310157	0.0196141
Gm32245	45.248	60.7195	26.2674	14.9042	13.6281	18.4444	20.6223	13.8343	36.7848	16.6323	2.21165	23.9582	-1.1756	0.398021	-2.95361	0.00314084	0.0198242
Psca	112.136	129.136	170.34	74.5211	172.298	154.773	417.603	239.794	121.533	246.117	0.493803	183.798	1.00551	0.340856	2.94995	0.00317826	0.0200564
Stpg2	4.91826	6.84163	6.36786	8.69413	16.5484	19.2464	12.0297	13.8343	6.70547	15.4147	0.435005	10.1293	1.24841	0.423352	2.94887	0.00318943	0.020101
Rspo3	9.83652	32.4977	25.4715	8.69413	42.8312	50.5218	34.3706	36.8915	19.125	41.1537	0.46472	43.4775	1.07965	0.366409	2.94656	0.00321332	0.0202198
Cited4	38.3624	46.181	42.1871	83.2152	21.4156	28.0676	27.4965	22.1349	52.4864	24.7786	2.11821	37.0068	-1.07633	0.365572	-2.94425	0.0032374	0.0203205
Cabp2	13.7711	11.1177	11.1438	6.21009	4.86718	4.00966	3.43706	0.922286	10.5607	3.30905	3.19145	8.26716	-1.6964	0.577181	-2.93912	0.0032915	0.02061
Gm11754	20.6567	12.8281	16.7156	32.2925	39.9109	37.6908	41.2447	53.4926	20.6232	43.0848	0.478666	28.548	1.09168	0.371452	2.93894	0.00329337	0.020647
Gm39159	18.6894	12.8281	12.7357	21.1143	6.81405	6.41546	5.15559	5.53372	16.3419	5.97971	2.73289	10.0054	-1.41297	0.481326	-2.93558	0.00332929	0.0207807
A2m	47.2153	40.1946	15.1237	8.69413	47.6984	44.1063	61.867	248.095	27.8069	100.442	0.276846	57.6935	1.85065	0.630621	2.93465	0.00333923	0.0208246
Tmem179	6.88556	3.42082	12.7357	6.21009	28.2297	28.0676	13.7482	11.0674	7.31305	20.2782	0.360635	17.1955	1.47437	0.502557	2.93374	0.00334909	0.020878
Gm29856	10.8202	7.69684	6.36786	4.96807	23.3625	10.4251	17.1853	27.6686	7.46324	19.6604	0.379608	13.0513	1.3897	0.474965	2.9259	0.00343463	0.0214358
Klhl33	6.88556	11.9729	3.18393	2.48404	24.3359	16.0387	8.59265	18.4457	6.1316	16.8532	0.363823	10.2076	1.4597	0.499852	2.92027	0.00349731	0.0217337
Lhfpl3	3.93461	3.42082	4.7759	3.72606	11.6812	12.029	13.7482	10.1452	3.96434	11.9009	0.333113	8.25717	1.56126	0.535084	2.91779	0.0035252	0.0217847
Gm33710	28.5259	50.457	23.8795	81.9732	20.4422	24.058	12.0297	11.9897	46.2089	17.1299	2.69756	29.4131	-1.39906	0.480367	-2.91249	0.00358557	0.0220769
Gm36470	27.5423	35.9186	17.5116	49.6807	14.6015	16.8406	6.87412	18.4457	32.6633	14.1905	2.30177	23.1915	-1.13125	0.388744	-2.91001	0.00361414	0.022238
Gm31527	38.3624	26.5113	19.1036	50.9228	23.3625	10.4251	8.59265	8.30058	33.725	12.6702	2.66176	24.5871	-1.38172	0.477135	-2.89587	0.00378113	0.0230432
Gm36183	23.6077	25.6561	18.3076	43.4707	62.2999	50.5218	51.5559	59.0263	27.7605	55.851	0.497046	39.6287	1.03229	0.356761	2.8935	0.00380974	0.0232369
Acvr1c	26.5586	35.9186	60.4947	17.3883	46.7249	105.053	75.6153	71.9383	35.09	74.8329	0.468912	73.8043	1.07574	0.371833	2.89306	0.00381505	0.0232552
LOC108168389	5.90191	5.13122	2.38795	6.21009	8.76093	19.2464	8.59265	13.8343	4.90779	12.6086	0.389243	8.8071	1.44648	0.50004	2.89273	0.00381913	0.0232885
Gm4887	23.6077	19.6697	14.3277	17.3883	9.73436	12.029	5.15559	3.68915	18.7483	7.65202	2.45011	12.67	-1.23338	0.426635	-2.89095	0.0038408	0.0234148
1700048O20Rik	6.88556	5.98643	2.38795	1.24202	18.4953	19.2464	17.1853	1.84457	4.12549	14.1929	0.290673	10.6058	1.74613	0.606772	2.87774	0.00400531	0.0242386
Abhd1	18.6894	15.3937	13.5317	16.1462	6.81405	8.01933	5.15559	6.45601	15.9403	6.61124	2.41108	10.8232	-1.2245	0.425566	-2.87734	0.00401047	0.0242408
Gm12915	18.6894	34.2082	19.8996	36.0185	17.5219	12.8309	5.15559	14.7566	27.2039	12.5662	2.16484	18.0834	-1.03745	0.360843	-2.87508	0.0040393	0.0243856
Lysmd2	4.91826	11.9729	19.1036	9.93615	19.4687	24.058	25.7779	25.824	11.4827	23.7822	0.482829	19.5373	1.00607	0.350562	2.86986	0.00410652	0.0247554
Gm14812	5.90191	8.55204	3.18393	2.48404	14.6015	14.4348	10.3112	13.8343	5.03048	13.2955	0.378361	9.18937	1.39476	0.487248	2.86252	0.00420287	0.0252305
Gm11127	9.83652	14.5385	22.2875	12.4202	7.78749	6.41546	1.71853	5.53372	14.7707	5.3638	2.75377	10.7684	-1.39171	0.486923	-2.85816	0.00426103	0.0255038
Adam5	1.9673	2.56561	2.38795	6.21009	6.81405	8.01933	20.6223	9.22286	3.28274	11.1696	0.293898	7.30212	1.75663	0.614815	2.85717	0.00427437	0.0255124
Gm17597	33.4442	23.9457	27.8594	39.7446	5.84062	13.6329	24.0594	15.6789	31.2485	14.8029	2.11096	25.7224	-1.12653	0.394541	-2.85529	0.00429973	0.0256896
Tekt5	4.91826	1.71041	3.97992	6.21009	9.73436	12.029	17.1853	10.1452	4.20467	12.2734	0.342583	8.62062	1.55648	0.545564	2.85297	0.00433131	0.025823
Klb	8.85287	6.84163	26.2674	9.93615	27.2562	52.1256	27.4965	22.1349	12.9745	32.2533	0.40227	28.381	1.30189	0.456716	2.85055	0.00436434	0.0259312
Gm35247	5.90191	5.98643	3.18393	1.24202	10.7078	12.029	12.0297	14.7566	4.07857	12.3808	0.329428	9.05495	1.56622	0.551942	2.83766	0.00454458	0.0268466
Gm30723	23.6077	21.3801	10.3478	57.1329	14.6015	6.41546	17.1853	8.30058	28.1171	11.6257	2.41853	21.748	-1.29953	0.458024	-2.83725	0.00455046	0.026869
Arxes2	17.7057	18.8145	27.8594	17.3883	43.8046	43.3044	36.0891	47.9589	20.442	42.7893	0.477736	35.7934	1.06198	0.374932	2.83246	0.00461909	0.0271778
Gm567	9.83652	7.69684	6.36786	3.72606	12.6547	14.4348	18.9038	22.1349	6.90682	17.032	0.405519	12.4094	1.26963	0.451945	2.80925	0.00496566	0.0288642
Eddm3b	31.4769	28.2217	31.8393	27.3244	12.6547	9.62319	8.59265	24.9017	29.7156	13.9431	2.13121	19.7933	-1.06099	0.377827	-2.80813	0.00498305	0.0290104
Gm38819	80.6595	56.4435	42.9831	165.188	59.3796	50.5218	18.9038	24.9017	86.3186	38.4267	2.24632	69.4776	-1.13549	0.4048	-2.80506	0.00503072	0.0291909
Cox16	85.5777	69.2715	133.725	124.202	60.353	40.0966	61.867	26.7463	103.194	47.2658	2.18327	59.1252	-1.13808	0.40584	-2.80427	0.00504311	0.0292056
Slc17a8	14.7548	10.2624	6.36786	13.6622	3.89375	0	5.15559	6.45601	11.2618	3.87633	2.90528	7.95071	-1.60268	0.571684	-2.80344	0.00505612	0.0292658
Gm32540	6.88556	2.56561	6.36786	1.24202	18.4953	11.2271	12.0297	9.22286	4.26526	12.7437	0.334695	8.18568	1.5336	0.548934	2.79377	0.00520968	0.029921
Gm33195	6.88556	9.40724	7.16385	11.1782	12.6547	14.4348	27.4965	21.2126	8.65871	18.9496	0.456933	14.6684	1.09972	0.394076	2.79063	0.00526048	0.030142
Snora74a	503.63	1462.4	1813.25	1894.08	2982.61	1691.28	3333.95	4411.3	1418.34	3104.78	0.456824	2461.58	1.13026	0.405054	2.79038	0.00526459	0.0301802
Cend1	11.8038	7.69684	16.7156	9.93615	16.5484	24.8599	29.215	22.1349	11.5381	23.1895	0.497557	17.6424	0.966017	0.346236	2.79005	0.00526994	0.0302423
F2	34.4278	12.8281	24.6755	24.8404	9.73436	3.20773	12.0297	15.6789	24.1929	10.1627	2.38057	23.2432	-1.27929	0.460242	-2.77961	0.00544246	0.0309802
Ankfn1	5.90191	5.13122	3.97992	12.4202	16.5484	10.4251	25.7779	13.8343	6.85831	16.6464	0.411998	11.6667	1.28841	0.46434	2.77471	0.00552504	0.0313566
Meox2	8.85287	5.13122	10.3478	18.6303	12.6547	35.285	25.7779	31.3577	10.7405	26.2688	0.40887	21.0753	1.33085	0.481088	2.76632	0.00566921	0.0320327
Gm40278	2.95096	6.84163	4.7759	4.96807	13.6281	17.6425	8.59265	9.22286	4.88414	12.2715	0.398006	10.4213	1.35772	0.490917	2.76568	0.0056804	0.0320759
Hist1h2ab	18.6894	18.8145	11.9397	9.93615	3.89375	7.21739	5.15559	4.61143	14.8449	5.21954	2.84411	8.5157	-1.50096	0.543455	-2.76189	0.00574679	0.0323269
Vmn1r20	12.7875	25.6561	15.1237	79.4892	15.575	5.61353	8.59265	13.8343	33.2641	10.9039	3.05067	19.0288	-1.58449	0.574026	-2.7603	0.00577481	0.0324844
Pou2af1	14.7548	20.5249	7.16385	12.4202	4.86718	4.8116	1.71853	9.22286	13.7159	5.15504	2.66068	18.1559	-1.32159	0.479338	-2.7571	0.00583157	0.0328308
Chst13	6.88556	13.6833	19.8996	9.93615	21.4156	21.6522	34.3706	32.28	12.6011	27.4296	0.459399	17.9942	1.0721	0.389449	2.75287	0.00590746	0.0331217
Angptl8	28.5259	35.9186	25.4715	52.1648	66.1937	78.5894	91.082	51.648	35.5202	71.8783	0.494171	48.8946	1.02187	0.371336	2.75188	0.00592537	0.0332538
Sox9	10.8202	1.71041	4.7759	12.4202	18.4953	29.6715	25.7779	10.1452	7.43167	21.0225	0.353511	13.9079	1.54182	0.560973	2.74847	0.00598738	0.0335111
Rn7s1	108.202	173.606	296.106	430.98	293.978	744.193	812.864	426.096	252.224	569.283	0.443055	352.84	1.17497	0.427698	2.7472	0.00601069	0.0335808
Cadm3	7.86922	11.9729	9.5518	7.45211	19.4687	32.0773	6.87412	25.824	9.21149	21.061	0.437371	15.5784	1.23087	0.448168	2.74645	0.00602435	0.033653
Gm32994	5.90191	5.13122	5.57188	6.21009	22.389	10.4251	10.3112	12.912	5.70378	14.0093	0.407141	9.4083	1.32035	0.482645	2.73564	0.00622582	0.0345039
Egr2	34.4278	31.6425	109.05	33.5345	30.1765	28.0676	20.6223	21.2126	52.1636	25.0198	2.0849	31.972	-1.06083	0.388277	-2.73214	0.00629235	0.0348772
Plk3	331.491	344.647	549.228	357.701	244.333	199.681	97.9562	80.2389	395.767	155.552	2.54427	271.241	-1.34466	0.492712	-2.7291	0.00635074	0.035088
Nrxn1	6.88556	11.1177	5.57188	8.69413	13.6281	20.8502	17.1853	28.5909	8.06731	20.0636	0.402086	15.4294	1.33077	0.487666	2.72886	0.00635533	0.0350967
Mchr1	56.0682	18.8145	16.7156	36.0185	19.4687	13.6329	5.15559	2.76686	31.9042	10.256	3.11078	19.7999	-1.59834	0.588209	-2.7173	0.00658168	0.0361061
Nr2e3	2.95096	4.27602	8.75581	7.45211	18.4953	12.8309	22.3409	14.7566	5.85873	17.1059	0.342497	11.4183	1.52367	0.5632	2.70537	0.00682281	0.0371293
Cntnap2	3.93461	3.42082	3.97992	7.45211	8.76093	10.4251	12.0297	15.6789	4.69686	11.7237	0.400631	9.16201	1.36694	0.50573	2.70289	0.00687385	0.0374186
Sidt1	6.88556	9.40724	8.75581	12.4202	17.5219	19.2464	22.3409	19.368	9.3672	19.6193	0.477449	18.1213	1.07205	0.397083	2.69981	0.0069379	0.0376182
Ly6d	40.3297	30.7873	28.6554	33.5345	85.6624	48.9179	111.704	37.8137	33.3267	71.0246	0.469228	55.0074	1.07712	0.399989	2.69287	0.00708407	0.0382257
2024-09-03	4.91826	10.2624	9.5518	7.45211	12.6547	28.0676	12.0297	17.5234	8.04615	17.5689	0.457978	15.8645	1.14904	0.427173	2.68988	0.00714773	0.0385257
Gm30319	22.624	22.2353	14.3277	33.5345	8.76093	12.029	17.1853	7.37829	23.1804	11.3384	2.04442	15.3219	-1.06568	0.39637	-2.68859	0.00717539	0.0386315
Gstp2	16.7221	29.0769	37.4112	28.5664	12.6547	8.82126	17.1853	16.6012	27.9442	13.8156	2.02265	17.4202	-1.05575	0.393486	-2.68308	0.00729477	0.0392779
Pcdhb7	4.91826	11.1177	6.36786	11.1782	15.575	12.8309	17.1853	25.824	8.39549	17.8538	0.470235	14.2289	1.1049	0.412532	2.67834	0.00739882	0.0396755
Ccdc150	14.7548	16.2489	15.1237	36.0185	16.5484	1.60387	3.43706	8.30058	20.5365	7.47248	2.74828	15.6466	-1.4109	0.527252	-2.67596	0.00745165	0.039803
Gm32380	44.2643	46.181	35.8192	122.96	41.8578	37.6908	10.3112	16.6012	62.3061	26.6152	2.34099	41.4587	-1.18413	0.442509	-2.67594	0.00745192	0.0398168
Dmkn	4.91826	8.55204	11.1438	2.48404	13.6281	15.2367	18.9038	15.6789	6.77452	15.8619	0.427095	11.2011	1.13599	0.42751	2.65721	0.00787896	0.0416629
1700001G17Rik	14.7548	8.55204	15.1237	14.9042	5.84062	2.4058	5.15559	4.61143	13.3337	4.50336	2.96083	7.00041	-1.59518	0.600601	-2.65597	0.00790807	0.0417209
Kng1	15.7384	18.8145	13.5317	4.96807	21.4156	28.0676	25.7779	37.8137	13.2632	28.2687	0.469182	24.5559	1.06773	0.402926	2.64994	0.00805065	0.0423983
Gm41301	7.86922	5.98643	3.97992	6.21009	10.7078	9.62319	18.9038	18.4457	6.01141	14.4201	0.416876	10.4004	1.24419	0.469787	2.64842	0.00808701	0.0425628
Gm15894	2.95096	14.5385	9.5518	26.0824	5.84062	0.801933	3.43706	4.61143	13.2809	3.67276	3.61605	8.595	-1.85159	0.700417	-2.64355	0.00820424	0.0429569
Gm38925	19.673	19.6697	14.3277	34.7765	5.84062	10.4251	18.9038	7.37829	22.1117	10.637	2.07876	14.4537	-1.11694	0.422739	-2.64214	0.00823832	0.0431052
LOC108168348	13.7711	23.0905	10.3478	29.8084	12.6547	5.61353	1.71853	5.53372	19.2545	6.38011	3.01789	14.6033	-1.52025	0.575383	-2.64215	0.00823815	0.0431052
Mbl2	7.86922	12.8281	7.16385	8.69413	18.4953	16.8406	12.0297	33.2023	9.13881	20.142	0.45372	19.398	1.16462	0.440906	2.64142	0.00825594	0.043378
LOC108168235	10.8202	15.3937	3.97992	13.6622	21.4156	27.2657	13.7482	27.6686	10.964	22.5245	0.486758	20.593	1.09461	0.414694	2.63956	0.00830135	0.0434099
Chrna2	23.6077	20.5249	17.5116	22.3563	12.6547	11.2271	10.3112	7.37829	21.0001	10.3928	2.02064	15.0804	-1.00606	0.381195	-2.63922	0.0083096	0.0435601
Tub	2.95096	3.42082	7.16385	3.72606	25.3093	12.029	10.3112	11.9897	4.31542	14.9098	0.289435	15.4318	1.7778	0.674183	2.63696	0.00836524	0.0436315
Tmem132c	3.93461	2.56561	1.59197	3.72606	15.575	10.4251	15.4668	0.922286	2.95456	10.5973	0.278803	7.664	1.8444	0.703042	2.62345	0.00870438	0.0450507
Cidea	177.057	37.629	133.725	129.17	164.511	222.135	316.209	384.593	119.395	271.862	0.439176	221.381	1.18755	0.453113	2.62088	0.00877041	0.0452651
Gm38908	18.6894	12.8281	13.5317	31.0505	12.6547	4.00966	5.15559	8.30058	19.0249	7.53013	2.52651	12.6414	-1.29532	0.494349	-2.62024	0.00878667	0.0453684
LOC108168104	12.7875	11.1177	10.3478	17.3883	6.81405	7.21739	5.15559	1.84457	12.9103	5.2579	2.45541	9.59855	-1.25962	0.481803	-2.6144	0.0089385	0.0459419
Gm34079	53.1172	43.6154	25.4715	117.992	31.15	28.0676	12.0297	34.1246	60.049	26.343	2.27951	45.0871	-1.14847	0.440049	-2.60986	0.00905784	0.0465471
Gm31231	34.4278	51.3122	46.167	75.7631	33.0968	38.4928	12.0297	18.4457	51.9176	25.5163	2.03469	39.595	-0.977391	0.374618	-2.60903	0.0090799	0.0465546
Gm12326	3.93461	7.69684	5.57188	7.45211	20.4422	13.6329	12.0297	13.8343	6.16386	14.9848	0.411342	12.259	1.30062	0.498706	2.60798	0.00910785	0.0466736
S100a14	5.90191	12.8281	12.7357	13.6622	23.3625	24.058	32.6521	18.4457	11.282	24.6296	0.458067	17.1812	1.10437	0.424592	2.60101	0.00929495	0.0473806
LOC102633643	181.976	274.52	232.427	632.187	198.581	161.188	53.2744	54.4149	330.278	116.865	2.82615	213.319	-1.49362	0.578524	-2.58177	0.00982954	0.0494593
Gm38456	2.95096	5.13122	6.36786	7.45211	10.7078	15.2367	6.87412	17.5234	5.47554	12.5855	0.435067	8.39908	1.26335	0.489535	2.58071	0.00985971	0.0495516

## Sheet: Total Gene Counts
	E1 M1	E1 M2	E1 M3	E1 M4	E1 F2	E1 F3	E1 F4	E1 F1	WT M1	WT M2	WT M3	WT M4	WT F1	WT F2	WT F3	WT F4
45352	14.7548	18.8145	31.0433	24.8404	18.4444	42.9632	35.9692	34.0703	16.1035	24.9284	19.6237	21.1405	38.0122	43.0531	21.5605	24.8816
45352	235.093	330.109	306.453	341.555	169.208	213.098	284.064	239.465	298.388	270.813	205.532	269.541	276.539	264.469	226.854	274.619
45353	7196.4	7439.42	7016.59	6302	5125.95	6207.33	5820.55	5244.87	6106.05	4757.93	5685.7	5715.32	5890	6131.11	4814.54	5090.59
45353	2264.37	2443.32	2470.73	2069.2	1689.67	1799.3	1774.48	1736.61	1782.75	1780.11	2112.13	2090.79	1682.99	1821.41	1653.59	1417.33
45354	217.387	250.575	202.976	252.13	220.531	219.972	205.67	204.422	153.456	225.489	214.828	212.462	198.614	201.207	197.794	195.367
45355	0	0.855204	0	0	0	0	0	0	0	0	0	0	0	0	0	0.92154
45356	2247.65	2481.8	2205.67	1879.17	1627.92	1766.65	2082.52	1652.89	2813.37	1878.7	2072.88	2108.76	1917.72	1864.46	1737.96	2002.51
45357	10472	10871.4	10612.8	11362	8033.76	8944.94	9503.24	8060.05	12266.1	11195.1	11026.4	10554.4	10000.1	10047.2	8388.89	8427.48
45358	1530.56	1470.1	1318.15	1131.48	1190.87	1641.2	1600.17	1285.91	1977.88	1410.72	1401.54	1692.29	1537.6	1635.14	1160.52	1342.68
45359	9395.84	9906.68	9496.87	7797.39	7005.68	7853.68	8260.92	7076.88	9359.9	7151.05	8248.14	7813.51	7064.58	7825.99	6533.76	7080.19
45360	412.15	378.855	476.794	356.459	362.474	278.402	226.882	285.217	215.029	461.176	381.112	391.098	231.875	239.867	274.662	173.25
45361	12.7875	8.55204	17.5116	28.5664	18.4444	25.7779	25.824	18.4953	29.3651	23.7953	26.8535	28.5396	29.4595	28.1163	21.5605	19.3523
45362	0	0	0	0	0	0	0	0	0	0	0	0	0	0	0	0
45536	32.4605	37.629	28.6554	40.9866	52.1256	48.1188	47.9589	40.8843	22.7343	72.519	45.4443	47.566	92.1797	47.4462	51.5576	28.5677
45537	2975.55	3335.3	3074.09	2528.75	2821.2	3136.32	3613.52	2769.43	3861.99	2403.33	2911.53	2776.8	3278.56	3091.91	2793.49	3311.09
45538	4.91826	10.2624	9.5518	7.45211	28.0676	12.0297	17.5234	12.6547	14.2089	12.4642	11.3611	8.45618	38.0122	16.694	24.3727	25.8031
45539	669.867	692.715	604.151	576.297	796.319	857.546	925.976	902.375	831.696	705.927	727.109	736.745	735.537	870.726	808.049	842.288
45540	43.2807	29.9321	33.4313	31.0505	44.9082	48.1188	35.9692	44.7781	23.6816	21.5291	39.2474	15.8553	57.0184	43.0531	55.3073	40.5478
45541	241.978	225.774	201.384	202.449	329.594	381.513	341.246	335.836	279.442	227.755	218.959	228.317	364.918	394.507	282.161	347.421
45542	2134.53	2424.5	2176.22	1430.81	2188.47	2668.88	2929.18	2218.46	2983.88	1723.46	2047.06	2087.62	2318.75	2310.81	2202.92	3009.75
45543	609.864	647.389	649.522	751.421	862.879	735.53	719.383	787.51	588.25	678.733	721.945	606.731	739.338	750.353	779.926	760.271
45544	1380.06	1130.58	1468.59	1360.01	1635.94	1703.06	1286.59	1542.9	988.942	1553.49	1509.99	1449.18	1559.45	1555.18	1737.96	1317.8
45545	414.118	455.824	421.871	344.039	501.208	632.419	696.326	549.018	650.769	380.725	450.312	440.779	600.594	691.485	528.7	639.549
45546	3156.54	2753.76	2805.04	2810.69	3891.78	3777.33	3716.81	3627.02	3260.48	3385.73	3110.87	2812.74	3908.61	3851.05	3955.88	3908.25
45547	0	0	0	0	0.801933	0	0	0	0	1.13311	0	0	0	0	0	0.92154
45549	0.983652	2.56561	2.38795	0	0.801933	3.43706	3.68915	1.94687	0.947262	1.13311	1.03283	4.22809	0.950306	2.6359	0.937411	0
45550	4489.39	5896.63	5521.73	3860.19	4126.75	5549.13	6475.37	4315.24	6447.07	3487.71	4606.4	4692.12	4886.47	5067.96	4313.97	5573.47
0610006L08Rik	472.153	515.688	470.426	275.728	130.715	232.001	203.825	133.361	481.209	379.592	489.559	417.524	160.602	187.149	146.236	171.406
0610007P14Rik	381.657	433.588	472.018	470.725	405.778	335.113	383.671	392.295	426.268	416.984	466.837	446.064	453.296	433.167	359.029	411.928
0610009B22Rik	563.633	664.493	616.091	490.597	388.135	453.692	543.227	449.728	634.666	440.78	573.218	583.477	424.787	479.734	434.959	466.299
0610009E02Rik	29.5096	20.5249	18.3076	9.93615	9.62319	17.1853	19.368	18.4953	16.1035	26.0615	26.8535	29.5966	20.9067	15.8154	31.872	19.3523
0610009L18Rik	53.1172	68.4163	83.5782	45.9547	55.3333	54.9929	72.8606	71.0608	68.2029	54.3893	77.4619	67.6495	60.8196	57.9898	65.6188	63.5863
0610009O20Rik	2006.65	1937.04	1863.4	1711.5	1510.04	1696.19	1456.29	1496.17	1400.05	1660.01	1716.56	1814.91	1544.25	1701.91	1531.73	1303.06
0610010B08Rik	0	0	0	0	0	0	0	0	0	0	0	0	0	0	0	0
0610010F05Rik	794.791	909.937	757.776	664.48	752.213	790.523	844.814	723.263	951.051	557.49	693.026	651.126	726.034	713.451	710.558	809.112
0610010K14Rik	455.431	400.235	399.583	264.55	314.358	379.795	346.78	335.836	254.814	460.042	424.491	400.612	341.16	370.784	356.216	260.796
0610011F06Rik	4235.61	4226.42	5011.51	3988.12	2239.8	3426.75	2428.38	2486.16	2919.46	3809.51	3880.32	3917.33	2592.44	2747.49	2428.83	1838.47
0610012G03Rik	897.091	873.163	946.424	741.485	700.087	888.48	829.136	718.396	836.433	710.46	844.851	824.478	688.972	715.208	750.866	783.309
0610025J13Rik	14.7548	5.98643	11.9397	14.9042	8.01933	13.7482	13.8343	6.81405	11.3671	16.9966	20.6565	10.5702	15.2049	10.5436	12.1863	13.8231
0610030E20Rik	711.18	616.602	717.977	894.253	797.923	680.538	659.435	768.041	788.122	751.252	746.733	725.118	727.935	752.111	705.871	696.684
0610031O16Rik	103.283	100.059	81.9862	48.4387	4.00966	5.15559	11.9897	7.78749	115.566	88.3825	140.464	107.816	11.4037	2.6359	7.49929	2.76462
0610037L13Rik	543.96	582.394	573.904	539.036	477.15	589.455	546.916	519.815	574.041	488.37	543.266	495.744	478.004	493.792	499.64	559.375
0610038B21Rik	44.2643	46.181	53.3309	44.7127	32.0773	27.4965	20.2903	20.4422	28.4179	33.9933	45.4443	33.8247	14.2546	21.9659	38.4339	27.6462
0610039H22Rik	13.7711	19.6697	19.8996	52.1648	32.8792	15.4668	16.6012	26.2828	15.1562	35.1264	10.3283	16.9124	19.9564	22.8445	29.0597	31.3324
0610039K10Rik	0	0	0.795983	2.48404	0	1.71853	0	2.92031	0	0	0	0	0.950306	0	0	0
0610040B10Rik	6.88556	16.2489	11.1438	21.1143	8.82126	24.0594	35.0469	23.3625	29.3651	9.06488	19.6237	32.7677	28.5092	23.7231	12.1863	27.6462
0610040F04Rik	167.221	146.24	148.849	167.673	137.932	118.579	201.981	149.909	203.661	134.84	137.366	124.729	160.602	138.824	156.548	173.25
0610040J01Rik	1456.79	1486.34	1408.09	1146.38	1728.16	1945.37	1800.3	1543.87	1163.24	1186.37	1268.31	1220.86	1770.42	1705.43	1558.91	1490.13
0610043K17Rik	145.581	182.158	160.789	161.462	85.8068	94.5191	105.141	128.494	177.138	138.239	133.234	150.097	128.291	94.8925	110.615	130.859
1010001N08Rik	8.85287	13.6833	3.97992	8.69413	12.029	8.59265	4.61143	12.6547	4.73631	12.4642	4.1313	5.28511	8.55276	12.3009	13.1238	19.3523
1100001I12Rik	0	1.71041	0	0	0.801933	0	2.76686	0	0.947262	1.13311	0	1.05702	0.950306	0	0.937411	1.84308
1110001J03Rik	535.107	594.367	671.81	468.241	513.237	797.398	639.145	550.965	291.757	363.728	398.67	484.117	610.097	702.029	571.821	481.044
1110002J07Rik	15.7384	17.9593	15.1237	26.0824	11.2271	12.0297	10.1452	12.6547	7.5781	12.4642	34.0832	10.5702	15.2049	7.02907	12.1863	5.52924
1110002L01Rik	52.1336	82.9548	61.2907	75.7631	69.7681	34.3706	59.0263	74.9546	68.2029	49.8568	44.4115	59.1933	57.9687	52.718	45.9332	63.5863
1110002O04Rik	0	0	0	0	0	0	0	0	0	0	0	1.05702	0	0	0	0
1110004E09Rik	470.186	508.846	480.774	288.148	366.483	455.41	458.376	404.949	504.891	301.407	438.951	365.73	402.93	498.186	376.839	423.908
1110004F10Rik	1036.77	1197.29	1161.34	794.892	971.14	1137.67	1262.61	1057.15	1158.5	847.566	1112.35	992.545	1128.96	1144.86	972.095	1126.12
1110006O24Rik	15.7384	16.2489	18.3076	22.3563	8.01933	5.15559	7.37829	15.575	7.5781	24.9284	20.6565	25.3686	13.3043	25.4804	12.1863	9.2154
1110008F13Rik	524.287	579.828	482.366	342.797	240.58	331.676	306.199	279.376	407.323	332.001	448.246	425.98	293.645	380.449	293.41	319.774
1110008L16Rik	473.137	620.023	518.185	534.068	516.445	572.27	631.766	528.576	803.278	541.626	544.299	515.827	492.259	651.068	455.582	505.004
1110008P14Rik	369.853	342.082	394.012	270.76	242.184	305.898	325.567	298.845	261.444	318.404	324.307	346.704	253.732	320.701	325.282	200.896
1110012L19Rik	292.145	325.833	282.574	239.71	297.517	367.765	379.06	256.014	323.964	176.765	304.683	248.4	315.502	350.575	284.036	329.911
1110015O18Rik	0	0	0	0	0	0	0	0	0	0	0	1.05702	0	0	0	0
1110017D15Rik	2.95096	5.13122	3.97992	2.48404	0.801933	5.15559	3.68915	4.86718	0.947262	3.39933	4.1313	3.17107	5.70184	7.90771	4.68706	3.68616
1110018N20Rik	42.297	17.1041	36.6152	43.4707	45.7102	51.5559	69.1715	45.7515	25.5761	28.3277	22.7222	34.8818	45.6147	72.9266	51.5576	42.3908
1110019D14Rik	152.466	194.131	165.564	156.494	149.159	159.823	147.566	160.617	213.134	149.57	152.858	156.439	176.757	146.732	149.048	197.21
1110020A21Rik	19.673	40.1946	27.8594	19.8723	9.62319	30.9335	35.9692	33.0968	34.1014	29.4608	43.3787	29.5966	14.2546	16.694	22.4979	35.0185
1110025L11Rik	0	0	0	0	0	0	0	0	0	0	0	0	0	0	0	0
1110028F11Rik	4.91826	8.55204	8.75581	6.21009	10.4251	1.71853	5.53372	14.6015	5.68357	21.5291	14.4596	9.51321	12.354	10.5436	17.8108	25.8031
1110028F18Rik	0	0	0	0	0	0	0.922286	0	0	0	0	0	0	0	0	0
1110032A03Rik	1095.79	1158.8	1053.09	889.285	872.503	1127.36	1054.17	866.358	1376.37	1078.72	1165.03	1127.84	1075.75	1035.91	873.667	929.834
1110032F04Rik	53.1172	80.3892	99.4979	69.553	106.657	130.608	200.136	99.2905	71.9919	40.7919	76.4291	53.9082	116.888	129.159	105.927	104.134
1110034G24Rik	127.875	129.991	109.846	144.074	137.13	111.704	143.877	135.308	114.619	106.512	101.217	114.158	116.888	152.004	158.423	176.936
1110036E04Rik	0	0	0	0	0	0	0	0	0	0	0	1.05702	0	0	0	1.84308
1110037F02Rik	1987.96	2093.54	1860.21	1921.4	1939.07	2017.55	2282.66	1890.41	2331.21	1874.16	1900.4	1899.47	2044.11	2116.63	1940.44	2218.15
1110038B12Rik	192.796	206.104	213.323	160.22	126.705	218.253	167.856	133.361	184.716	180.164	216.893	199.777	172.005	173.97	160.297	114.271
1110038F14Rik	278.374	270.244	281.778	265.792	258.222	348.861	253.629	258.934	189.452	259.482	320.176	279.054	283.191	310.158	284.973	198.131
1110046J04Rik	2.95096	5.98643	9.5518	4.96807	12.8309	18.9038	13.8343	22.389	8.52536	0	6.19695	7.39916	11.4037	9.66497	10.3115	9.2154
1110051M20Rik	418.052	490.887	494.305	511.712	516.445	443.381	541.382	532.47	521.942	432.848	431.721	478.831	466.6	499.943	492.141	465.378
1110057P08Rik	0	0	0	0	0	0	0	0	0	0	0	0	0	0	0	0
1110058D11Rik	14.7548	6.84163	3.97992	17.3883	16.0387	1.71853	5.53372	9.73436	4.73631	22.6622	5.16413	9.51321	9.50306	8.78634	14.0612	11.98
1110059E24Rik	284.275	381.421	370.928	265.792	289.498	414.166	463.91	344.596	484.998	244.752	302.618	356.217	394.377	406.808	326.219	411.928
1110059G10Rik	237.06	284.783	244.367	182.577	190.058	271.528	289.598	257.961	323.964	205.093	241.681	270.598	251.831	258.318	221.229	251.58
1110065P20Rik	29.5096	31.6425	50.1469	45.9547	23.256	67.0226	30.4355	33.0968	10.4199	40.7919	19.6237	30.6537	24.708	35.1454	27.1849	6.45078
1190002N15Rik	312.801	418.195	395.604	320.441	558.145	453.692	577.351	500.346	476.473	346.731	365.62	365.73	484.656	557.933	468.706	612.824
1190003K10Rik	0	0	0	0	0	0	0	0	0	0	0	0	0	0	0	0
1190005I06Rik	0	0	0	0	0	0	0	0	0	0	0	0	0	0	0	0
1190007I07Rik	104.267	106.9	98.7019	125.444	68.9662	85.9265	103.296	95.3968	107.041	63.4541	98.1184	95.1321	72.2233	92.2566	88.1167	94.9186
1190028D05Rik	0	0	0	0	0	0	0	0	0	0	0	0	0	0	0	0
1300002E11Rik	420.019	342.937	350.233	371.364	385.73	390.106	396.583	403.003	402.586	372.793	347.029	409.068	417.184	392.749	438.708	481.966
1300017J02Rik	3.93461	1.71041	0.795983	0	0.801933	1.71853	4.61143	1.94687	0	6.79866	1.03283	0	1.90061	1.75727	0	0.92154
1500002F19Rik	10.8202	9.40724	7.16385	14.9042	11.2271	15.4668	13.8343	8.76093	8.52536	18.1298	14.4596	11.6273	15.2049	14.0581	8.4367	15.6662
1500004A13Rik	39.3461	35.9186	23.0835	50.9228	50.5218	34.3706	35.0469	44.7781	53.0467	53.2561	43.3787	48.6231	43.7141	30.7522	48.7454	50.6847
1500009C09Rik	0	0	0	0	0	0	0	0	0	0	0	0	0	0	0	0
1500009L16Rik	12.7875	16.2489	13.5317	18.6303	16.0387	24.0594	31.3577	24.3359	25.5761	7.93177	13.4267	15.8553	19.0061	12.3009	18.7482	23.0385
1500011B03Rik	129.842	126.57	154.421	89.4253	146.754	177.008	150.333	164.511	160.087	141.639	133.234	154.325	135.894	137.067	157.485	136.388
1500011K16Rik	266.57	288.204	345.457	352.733	164.396	317.928	223.193	244.333	214.081	250.417	281.961	317.107	267.036	301.371	237.165	179.7
1500012K07Rik	0	0	0	0	0	0	0	0	0	0	0	0	0	0	0	0
1500015A07Rik	92.4633	94.9276	83.5782	64.585	72.1739	67.0226	87.6172	93.4499	89.0427	79.3177	106.381	118.387	76.0245	78.1984	80.6174	93.0756
1500015L24Rik	0	0	0	0	0	0	0	0	0	0	0	0	0	0	0	0
1500015O10Rik	15.7384	23.0905	22.2875	14.9042	31.2754	22.3409	19.368	36.0171	18.9452	19.2629	22.7222	32.7677	26.6086	17.5727	104.99	86.6248
1500017E21Rik	1.9673	0.855204	0	3.72606	2.4058	0	0.922286	0.973436	0	1.13311	4.1313	0	0.950306	2.6359	1.87482	0
1500026H17Rik	214.436	244.588	212.527	192.513	139.536	152.949	245.328	153.803	259.55	125.775	153.891	184.979	185.31	182.756	194.982	174.171
1500035N22Rik	28.5259	38.4842	27.8594	94.3934	48.116	18.9038	18.4457	28.2297	28.4179	49.8568	23.755	27.4826	36.1116	21.0872	43.1209	58.057
1520401A03Rik	0	5.13122	2.38795	1.24202	0.801933	0	0.922286	0.973436	3.78905	3.39933	3.09848	3.17107	1.90061	3.51454	9.37411	6.45078
1600002D24Rik	0	0.855204	0.795983	0	1.60387	0	0	0	0	0	0	0	0	0	0	0
1600002H07Rik	94.4306	91.5068	83.5782	111.782	116.28	73.8968	83.0058	73.0077	87.1481	96.3143	90.8886	102.531	65.5711	67.6548	82.4922	70.0371
1600002K03Rik	71.8066	95.7828	91.538	95.6354	71.372	68.7412	84.8504	73.0077	51.1522	62.321	71.2649	98.3031	64.6208	76.4412	73.1181	61.7432
1600010M07Rik	1.9673	0.855204	1.59197	1.24202	0.801933	3.43706	1.84457	0	0.947262	3.39933	3.09848	5.28511	1.90061	0	1.87482	2.76462
1600012H06Rik	482.973	510.557	515.001	498.049	470.734	474.314	484.2	458.488	507.733	433.981	499.887	473.546	518.867	485.885	426.522	447.869
1600014C10Rik	1788.28	1986.64	1927.07	1993.44	1196.48	1134.23	1080	1147.68	1626.45	1569.36	1762	1784.25	1067.19	1172.98	1089.27	983.283
1600014C23Rik	0	0.855204	0	0	0.801933	0	0	0	0	0	0	0	0	0	0	1.84308
1600015I10Rik	0.983652	0	0	0	2.4058	0	0.922286	0.973436	0.947262	1.13311	0	0	0	0	0	0.92154
1600019K03Rik	0	0	0	0	0	1.71853	0	0	0	0	0	0	0	0	0	0
1600020E01Rik	139.679	178.738	159.993	186.303	157.179	125.453	138.343	156.723	161.035	140.506	123.939	135.299	94.0803	125.645	127.488	177.857
1600023N17Rik	6.88556	10.2624	7.16385	1.24202	6.41546	3.43706	10.1452	8.76093	13.2617	4.53244	6.19695	2.11405	7.60245	12.3009	6.56188	5.52924
1600025M17Rik	0	0	0	0	0	0	0	0	0	0	0	0	0	0	0	0
1600027J07Rik	0	0	0	0	0	0	0	0	0	0	0	0	0	0	0	0
1600029I14Rik	3.93461	2.56561	1.59197	4.96807	1.60387	0	0.922286	0.973436	0.947262	7.93177	3.09848	0	2.85092	2.6359	0.937411	0.92154
1600029O15Rik	0	0.855204	1.59197	0	0	0	0.922286	2.92031	0.947262	1.13311	0	1.05702	0.950306	1.75727	0.937411	0
1700001C02Rik	0.983652	0	0	0	0	0	0	0.973436	0	0	0	0	0	0	0.937411	0.92154
1700001C19Rik	2.95096	6.84163	0.795983	2.48404	7.21739	3.43706	4.61143	4.86718	2.84179	2.26622	2.06565	0	1.90061	6.15044	5.62447	3.68616
1700001D01Rik	38.3624	36.7738	31.0433	73.2791	36.8889	10.3112	16.6012	57.4327	35.0487	72.519	17.558	31.7107	22.8073	12.3009	34.6842	47.9201
1700001F09Rik	0	0	0	0	0	0	0	0	0	0	0	0	0	0	0	0
1700001G01Rik	0	0	0	0	0	0	0	0	0	0	0	0	0	0	0	0
1700001G11Rik	3.93461	11.1177	6.36786	4.96807	9.62319	6.87412	11.0674	12.6547	12.3144	11.3311	10.3283	3.17107	7.60245	7.02907	3.74965	5.52924
1700001G17Rik	14.7548	8.55204	15.1237	14.9042	2.4058	5.15559	4.61143	5.84062	1.89452	2.26622	9.29543	5.28511	2.85092	8.78634	8.4367	1.84308
1700001J03Rik	10.8202	10.2624	9.5518	13.6622	21.6522	12.0297	11.0674	18.4953	10.4199	14.7304	12.3939	8.45618	10.4534	14.0581	21.5605	17.5093
1700001J11Rik	0	0	0	1.24202	0	0	0	0	0	0	0	0	0	0	0	0
1700001K19Rik	17.7057	23.0905	23.8795	28.5664	31.2754	17.1853	11.9897	29.2031	17.998	31.7271	24.7878	21.1405	36.1116	24.6018	29.9972	22.117
1700001K23Rik	11.8038	13.6833	9.5518	17.3883	9.62319	3.43706	16.6012	15.575	7.5781	6.79866	13.4267	7.39916	15.2049	7.90771	14.0612	11.0585
1700001L05Rik	266.57	272.81	285.758	314.231	257.42	225.127	318.189	254.067	317.333	300.274	319.143	232.545	225.223	246.018	224.979	238.679
1700001L19Rik	5.90191	0.855204	2.38795	4.96807	5.61353	6.87412	8.30058	4.86718	1.89452	5.66555	5.16413	9.51321	5.70184	4.39317	4.68706	5.52924
1700001O22Rik	20.6567	10.2624	11.9397	28.5664	27.2657	17.1853	18.4457	17.5219	12.3144	10.198	11.3611	15.8553	25.6583	12.3009	16.8734	18.4308
1700001P01Rik	2.95096	1.71041	1.59197	4.96807	2.4058	3.43706	5.53372	4.86718	4.73631	3.39933	7.22978	2.11405	2.85092	7.02907	5.62447	3.68616
1700003C15Rik	0	0	0	0	0	0	0	0	0	0	0	0	0	0	0	0
1700003D09Rik	43.2807	38.4842	28.6554	69.553	33.6812	32.6521	26.7463	60.353	55.8885	33.9933	24.7878	43.3379	33.2607	20.2086	39.3713	45.1555
1700003E16Rik	113.12	100.914	131.337	117.992	125.101	168.416	94.0732	138.228	52.0994	145.038	122.906	131.071	121.639	139.703	114.364	57.1355
1700003E24Rik	0	0	0	0	0	0	0	0	0	0	0	0	0	0	0	0
1700003F12Rik	0	0.855204	3.18393	2.48404	4.00966	0	0	5.84062	0.947262	3.39933	1.03283	2.11405	0	1.75727	3.74965	0.92154
1700003G13Rik	0	0	0	0	0	0	0	0	0	0	0	0	0	0	0	0
1700003G18Rik	0.983652	1.71041	2.38795	2.48404	0.801933	0	2.76686	0.973436	0	2.26622	0	1.05702	0.950306	5.2718	0	3.68616
1700003H04Rik	0	0	0	0	0	0	0	0	0	0	0	0	0	0	0	0
1700003I22Rik	0	0	0	0	0	0	0	0	0	0	0	0	0	0	0	0
1700003L19Rik	0	0	0.795983	1.24202	0.801933	1.71853	0.922286	0	0	0	1.03283	0	0.950306	0	1.87482	2.76462
1700003M07Rik	0	0	0	0	0	0	0	0	1.89452	0	1.03283	0	0	0	0	3.68616
1700003P14Rik	12.7875	12.8281	15.9197	21.1143	12.029	6.87412	9.22286	12.6547	11.3671	22.6622	14.4596	11.6273	5.70184	4.39317	9.37411	5.52924
1700006A11Rik	0	0	0	0	0	0	0	0	0	0	0	0	0	0	0	0
1700006E09Rik	0	0.855204	0	0	0	0	0	0	0	0	0	0	0	0	0.937411	0
1700006F04Rik	0	0.855204	0	0	0	0	0	0	0	2.26622	0	0	0.950306	0.878634	1.87482	0
1700006H20Rik	0.983652	2.56561	0.795983	0	0	1.71853	0	0	0	1.13311	0	3.17107	0.950306	1.75727	0	1.84308
1700006H21Rik	0	0	0.795983	0	0	0	0	0	0	0	0	0	0	0	0.937411	0
1700007B14Rik	0	0	0	0	4.00966	0	0.922286	0	0	0	0	0	2.85092	0	0	0
1700007E05Rik	2.95096	4.27602	3.18393	7.45211	0	0	0.922286	0	6.63084	3.39933	3.09848	0	2.85092	3.51454	0.937411	0
1700007F19Rik	59.0191	58.1539	42.9831	90.6674	79.3913	13.7482	34.1246	85.6624	40.7323	62.321	52.6741	42.2809	40.8632	36.9026	78.7425	97.6833
1700007G11Rik	0.983652	0.855204	0	1.24202	2.4058	3.43706	7.37829	1.94687	0	1.13311	0	0	2.85092	1.75727	4.68706	3.68616
1700007J10Rik	7.86922	12.8281	8.75581	16.1462	20.0483	3.43706	9.22286	13.6281	8.52536	20.396	7.22978	17.9694	12.354	5.2718	20.623	18.4308
1700007K09Rik	0	0	0	0	0	0	0.922286	0	0	0	0	0	0	0	0	0.92154
1700007K13Rik	2.95096	0	7.95983	6.21009	5.61353	3.43706	4.61143	7.78749	5.68357	1.13311	7.22978	4.22809	3.80122	4.39317	2.81223	7.37232
1700007L15Rik	43.2807	41.905	50.9429	53.4068	28.0676	34.3706	40.5806	25.3093	47.3631	40.7919	36.1489	57.0792	35.1613	32.5095	40.3087	36.8616
1700007P06Rik	0	0.855204	2.38795	3.72606	1.60387	0	0.922286	0	0.947262	4.53244	0	1.05702	0	0	0.937411	0.92154
1700008C04Rik	0	0	0	0	0	0	0	0	0	0	0	0	0	0	0	0
1700008J07Rik	76.7249	74.4027	75.6184	110.54	56.1353	56.7115	55.3372	78.8483	121.25	67.9866	86.7573	72.9346	57.0184	70.2907	67.4936	64.5078
1700008K24Rik	0	0	0	0	0	0	0	0	0	0	0	0	0	0	0	0
1700008O03Rik	4.91826	7.69684	4.7759	12.4202	1.60387	3.43706	3.68915	6.81405	0	3.39933	1.03283	4.22809	3.80122	2.6359	4.68706	2.76462
1700008P02Rik	0	0	0	0	0	0	0	0	0	0	0	0	0	0	0	0
1700009C05Rik	0.983652	0	0	0	0	0	0	0	0	0	0	0	0	0	0	0
1700009J07Rik	43.2807	37.629	31.8393	45.9547	41.7005	41.2447	23.0572	45.7515	15.1562	52.123	39.2474	48.6231	30.4098	46.5676	46.8706	41.4693
1700009N14Rik	0	0	0.795983	0	0	0	0	0	0	0	0	0	0	0	0	0
1700010B08Rik	0	0	0	0	0	0	0	0	0	0	0	0	0.950306	0	0	0
1700010D01Rik	0	0	0	2.48404	0.801933	0	0	0	0	0	0	0	0	0.878634	0	0
1700010I02Rik	0	0	0	1.24202	0	0	0	0.973436	0	0	0	0	0	0.878634	0	0
1700010I14Rik	26.5586	29.0769	37.4112	27.3244	43.3044	41.2447	33.2023	51.5921	40.7323	46.4575	29.9519	40.1669	29.4595	33.3881	30.9346	31.3324
1700010J16Rik	0	0	0	0	0	0	0	0	0	0	0	1.05702	0	0	0	0
1700010K23Rik	0	0	0	0	0	0	0	0	0	0	0	0	0	0	0	0
1700010L04Rik	0	1.71041	0.795983	4.96807	0	8.59265	3.68915	5.84062	1.89452	2.26622	3.09848	4.22809	5.70184	2.6359	0.937411	2.76462
1700010N08Rik	2.95096	0.855204	2.38795	4.96807	2.4058	1.71853	4.61143	1.94687	0.947262	0	0	0	1.90061	5.2718	0	3.68616
1700011B04Rik	0	0	0	0	0	0	0	0	0	0	0	0	0	0	0	0
1700011C11Rik	0	0	0	0	0.801933	0	2.76686	0	0	0	0	0	0	0.878634	1.87482	0
1700011E24Rik	0	0	0	2.48404	0	1.71853	0	0	0	0	1.03283	2.11405	4.75153	0.878634	0	2.76462
1700011H14Rik	2105.02	2533.97	2294.82	1778.57	3540.53	4588.47	4939.77	3465.43	2925.15	1636.21	1967.53	2120.39	4265.92	4374.72	3655.9	4531.21
1700011I03Rik	0.983652	0	0.795983	2.48404	1.60387	0	0.922286	4.86718	0	3.39933	2.06565	1.05702	2.85092	0.878634	5.62447	0.92154
1700011L22Rik	0.983652	0	0	0	0.801933	0	1.84457	0.973436	0.947262	3.39933	2.06565	2.11405	0.950306	0.878634	0	1.84308
1700011M02Rik	0	0	0	2.48404	0	1.71853	0.922286	0.973436	0	0	0	0	0	0	0.937411	0
1700012A03Rik	0	0	0	0	0	0	0	0	0	0	0	0	0	0	0	0
1700012B07Rik	0	0	0	0	0	0	0	0	0	0	0	0	0	0	0	0
1700012B09Rik	1.9673	0	0	0	0.801933	1.71853	0	0	0	0	0	0	0	0	0	0
1700012C14Rik	1.9673	0	0	0	0	0	0	0	0	0	0	0	1.90061	0.878634	0	0
1700012D01Rik	12.7875	10.2624	7.16385	9.93615	9.62319	8.59265	7.37829	9.73436	9.47262	6.79866	7.22978	9.51321	2.85092	6.15044	5.62447	10.1369
1700012D14Rik	27.5423	21.3801	19.1036	44.7127	13.6329	34.3706	16.6012	22.389	28.4179	28.3277	29.9519	36.9958	25.6583	23.7231	22.4979	32.2539
1700012D16Rik	7.86922	9.40724	1.59197	6.21009	5.61353	5.15559	3.68915	7.78749	3.78905	10.198	7.22978	1.05702	1.90061	2.6359	11.2489	7.37232
1700012H19Rik	0	0	0	0	0	0	0	0	0	0	0	0	0	0	0	0
1700012I11Rik	0.983652	0	0.795983	0	0	0	0	0	0	0	0	0	0	0	0	0
1700012J15Rik	0	0	0	0	0	0	0	0	0	0	0	0	0	0	0	0
1700012L04Rik	0	0.855204	0.795983	0	0	0	0.922286	0.973436	0	0	0	0	0	0	0	0
1700012P22Rik	0	0.855204	0	0	0	0	0	0	0	0	0	0	0	0	0	0
1700013D24Rik	0	0	0	0	0	0	0	0	0	0	0	0	0	0	0.937411	0
1700013F07Rik	0	0	0	0	0	1.71853	0	0.973436	2.84179	3.39933	0	0	0.950306	0	0	0.92154
1700013G24Rik	0	0.855204	0	0	0	0	0	0	0	0	0	0	0	0	0	0
1700013H16Rik	0	0	0	0	0	0	0	0	0	0	0	0	0	0	0	0
1700013N06Rik	0	0	0	0	0	0	0	0	0	0	0	0	0	0	0	0
1700015C15Rik	0.983652	0	0	0	0	0	0	0	0	0	0	0	0	0.878634	0.937411	1.84308
1700015E13Rik	15.7384	17.9593	19.1036	36.0185	21.6522	20.6223	15.6789	32.1234	17.0507	33.9933	30.9848	27.4826	24.708	28.9949	25.3101	21.1954
1700015F17Rik	0	1.71041	0.795983	0	0	0	1.84457	0	0	0	0	0	0	0.878634	0	0.92154
1700015G11Rik	1.9673	1.71041	1.59197	0	4.00966	1.71853	5.53372	1.94687	0.947262	3.39933	0	1.05702	0.950306	1.75727	1.87482	0
1700016A09Rik	1.9673	1.71041	4.7759	1.24202	1.60387	1.71853	2.76686	4.86718	0.947262	2.26622	3.09848	1.05702	2.85092	2.6359	3.74965	4.6077
1700016B01Rik	0	0	0	0	0	0	0	0	0	0	0	0	0	0	0	0
1700016C15Rik	504.614	668.769	550.024	371.364	259.024	271.528	344.013	255.04	733.181	409.052	477.165	532.74	217.62	276.77	301.846	440.496
1700016C19Rik	0	0	0.795983	0	0.801933	0	0.922286	0	0	0	0	1.05702	0	0	0	0
1700016D06Rik	0	0	0	0	0	0	0	0.973436	0	0	0	0	0	1.75727	0	0
1700016G14Rik	3.93461	0	0	4.96807	1.60387	1.71853	0.922286	2.92031	1.89452	1.13311	0	1.05702	0.950306	4.39317	0	0.92154
1700016G22Rik	0	0	0.795983	0	2.4058	0	0	0	0	0	0	0	0	0	0	1.84308
1700016H13Rik	0	0.855204	0	0	0.801933	0	0.922286	0	0	0	1.03283	0	0	0	0	0
1700016J18Rik	1.9673	0.855204	3.18393	1.24202	4.00966	1.71853	0	4.86718	0	1.13311	0	4.22809	1.90061	6.15044	1.87482	3.68616
1700016K19Rik	0.983652	0.855204	0	1.24202	0	0	0	0	0.947262	1.13311	1.03283	0	0	0.878634	0	0
1700016L04Rik	1.9673	0	1.59197	1.24202	0.801933	1.71853	0	0	0	1.13311	4.1313	1.05702	0	2.6359	0.937411	0
1700016L21Rik	0	0	0	0	0	0	0	0	0	0	0	0	0	0	0	0
1700016P04Rik	0	0	0	0	0	0	0	0	0	0	0	0	0	0	0	0
1700017B05Rik	536.09	490.887	482.366	652.06	379.314	329.958	288.676	412.737	237.763	473.64	444.115	430.208	397.228	370.784	426.522	270.933
1700017D01Rik	0	1.71041	0	0	0	0	0	0	0	0	0	0	0	0	0	0
1700017G19Rik	0	0	0	0	0	0	0.922286	0	0.947262	0	0	0	0	0	0	0.92154
1700017J07Rik	0	0	0	0	0	0	0	0.973436	0	0	0	0	0	0	0	0.92154
1700017L05Rik	0	0	0	0	0	0	0	0	0	0	0	0	0	0	0	0
1700017M07Rik	0	0	0	0	0	0	0	0	0	0	0	0	0	0	0	0
1700017N19Rik	0	0.855204	0	0	0	0	0	0	0	0	0	0	0	0	0	0
1700018A04Rik	0.983652	0.855204	0.795983	0	2.4058	1.71853	1.84457	0.973436	0.947262	0	0	0	0.950306	3.51454	0.937411	0.92154
1700018A23Rik	2.95096	0	1.59197	6.21009	5.61353	0	3.68915	3.89375	2.84179	6.79866	2.06565	1.05702	1.90061	0	3.74965	0.92154
1700018B08Rik	0	0	0	0	0	0	0	0	0	0	0	0	0	0	0.937411	0
1700018B24Rik	0	0	0	0	0	0	0	0	0	0	0	0	0	0	0	0
1700018C11Rik	0	0	0	2.48404	0	0	0.922286	0	0	0	1.03283	0	0	0	0	0
1700018F24Rik	0	0	0	0	0	0	0	0	0	0	0	0	0	0	0	0
1700018G05Rik	0	0	0	0	0.801933	1.71853	3.68915	0	0	0	0	0	0.950306	2.6359	0	0
1700018L02Rik	7.86922	5.13122	11.1438	13.6622	7.21739	10.3112	11.0674	10.7078	11.3671	11.3311	8.2626	10.5702	9.50306	14.0581	8.4367	13.8231
1700019A02Rik	8.85287	2.56561	7.16385	8.69413	8.01933	12.0297	11.0674	13.6281	11.3671	7.93177	6.19695	10.5702	9.50306	6.15044	6.56188	8.29386
1700019B03Rik	2.95096	2.56561	6.36786	6.21009	8.01933	3.43706	6.45601	4.86718	0	6.79866	2.06565	6.34214	1.90061	4.39317	5.62447	4.6077
1700019B21Rik	0	0	0	0	0	0	0	0	0.947262	0	0	0	0	0	0	0
1700019C18Rik	0	0	0	0	0	0	0	0	0	0	0	0	0	0	0	0
1700019D03Rik	19.673	19.6697	21.4915	19.8723	69.7681	60.1485	75.6275	47.6984	21.787	19.2629	8.2626	17.9694	53.2171	79.9557	42.1835	58.057
1700019E08Rik	0	0	0	0	0	0	0	0	0	0	0	0	0	0	0	0
1700019F05Rik	0	0	0	0	0.801933	0	0	0	0.947262	0	0	0	0	0	0	0
1700019G24Rik	0	0	0	0	0.801933	0	0	0.973436	0	1.13311	0	0	0	0	0	0
1700019J19Rik	0	0	0	0	0	0	0	0	0	1.13311	0	0	0.950306	0	0	0
1700019L22Rik	0	0	0	0	0	0	0	0	0.947262	1.13311	0	0	0	0.878634	0.937411	0.92154
1700019M22Rik	0	0	0	0	0	0	0	0	0	0	0	0	0	0	0	0
1700019N19Rik	0	0.855204	0	0	0	1.71853	1.84457	0	0.947262	1.13311	3.09848	2.11405	0	2.6359	0	4.6077
1700019O17Rik	0.983652	0	0	0	0	0	0	0	0	0	0	0	0	0.878634	0	0
1700019P21Rik	0	0	0	0	0	0	0	0	0	0	0	0	0	0	0	0
1700020A23Rik	0	0.855204	0	0	0	0	0.922286	0.973436	0	1.13311	1.03283	1.05702	1.90061	0.878634	0.937411	0.92154
1700020D05Rik	13.7711	10.2624	15.1237	23.5984	15.2367	8.59265	9.22286	21.4156	16.1035	16.9966	16.5252	13.7413	10.4534	9.66497	10.3115	20.2739
1700020D12Rik	0	0	0	0	0	0	0	0	0	0	0	0	0	0	0	0
1700020D14Rik	0	0	0	0	0	0	0	0	0	0	0	0	0	0	0	0
1700020G17Rik	0	0	0	0	0	0	0	0.973436	0	0	0	0	0	0	0	0
1700020I14Rik	1451.87	1549.63	1466.2	1333.93	1414.61	1297.49	1518.08	1427.06	1674.76	1334.8	1425.3	1446.01	1465.37	1426.02	1372.37	1516.86
1700020L24Rik	5.90191	5.98643	4.7759	13.6622	6.41546	8.59265	4.61143	4.86718	3.78905	5.66555	4.1313	2.11405	4.75153	4.39317	2.81223	1.84308
1700020M21Rik	0	0	0	0	0	0	0	0	0.947262	0	0	0	0	0	0	0.92154
1700020N01Rik	0	3.42082	3.97992	1.24202	3.20773	17.1853	11.9897	6.81405	3.78905	1.13311	1.03283	1.05702	11.4037	6.15044	5.62447	3.68616
1700020N15Rik	0	0	0	0	0	0	0	0	0	0	0	0	0	0	0	0
1700020N18Rik	0	0	1.59197	0	0	0	1.84457	0	0	2.26622	3.09848	0	1.90061	0	0	0
1700021F02Rik	0	0.855204	0	3.72606	0.801933	0	0	0	0	0	0	1.05702	0	0	0	0
1700021F05Rik	957.093	970.656	889.909	648.334	607.063	658.197	746.13	612.291	868.64	686.664	747.765	739.916	662.363	651.946	669.312	731.703
1700021F07Rik	0	0	0	0	0	0	0	0	0	0	0	0	0	0	0	0
1700021L23Rik	0	0	0	0	0	0	0	0	0	0	0	0	0	0	0	0
1700021N21Rik	0.983652	2.56561	0.795983	0	3.20773	1.71853	4.61143	2.92031	3.78905	0	1.03283	1.05702	11.4037	3.51454	4.68706	4.6077
1700022A21Rik	0	0	0	0	0	0	0	0	0	0	0	0	0	0	0	0
1700022A22Rik	0	0	0	0	0	0	0	0	0	0	0	0	0	0	0	0
1700022E09Rik	0	0	0	0	0	0	0	0	0	0	0	0	0	0	0	0
1700022H01Rik	0	0	2.38795	0	3.20773	3.43706	1.84457	2.92031	2.84179	0	1.03283	2.11405	3.80122	4.39317	3.74965	1.84308
1700022H16Rik	0	0	0	0	1.60387	0	0	0	0	0	0	0	0.950306	0.878634	0	0
1700022I11Rik	8.85287	7.69684	10.3478	4.96807	9.62319	10.3112	5.53372	8.76093	10.4199	5.66555	9.29543	7.39916	9.50306	7.90771	6.56188	9.2154
1700022N22Rik	72.7903	76.1131	74.0264	58.3749	60.9469	53.2744	80.2389	60.353	133.564	112.178	106.381	76.1057	76.9748	54.4753	54.3699	71.8801
1700023C21Rik	0	0	0	0	0	0	0	0	0	0	0	0	0	0	0	0
1700023F02Rik	0	0	0	0	0	0	0	0	0	0	0	0	0	0	0	0
1700023F06Rik	0.983652	0	0.795983	3.72606	1.60387	1.71853	0	0.973436	0	0	1.03283	0	0.950306	0	1.87482	0
1700023G09Rik	0	0	0	0	0	0	0	0	0	0	0	0	0	0	0	0
1700024B05Rik	0	0	0	0	0	0	0	0	0	0	0	0	0	0	0	0
1700024B18Rik	0	0	0	0	0	0	0	0	0	0	0	0	0	0	0	0
1700024F13Rik	0.983652	0	0.795983	2.48404	4.00966	1.71853	0.922286	1.94687	1.89452	3.39933	1.03283	0	0	5.2718	1.87482	5.52924
1700024G13Rik	0	0	0	0	0	0	0	0	0	0	0	0	0	0	0	0
1700024I08Rik	0	0	0	0	0	0	0	0	0	0	0	0	0	0	0	0
1700024N05Rik	0	0.855204	0	0	0	0	0	0.973436	0	0	0	0	0.950306	0	0	0.92154
1700024P04Rik	0	0	0	0	0.801933	0	0	0	0.947262	0	0	0	0	0	0	0
1700024P16Rik	122.957	119.729	124.969	222.321	97.0338	56.7115	80.2389	115.839	136.406	209.625	112.578	144.812	113.086	74.6839	122.801	133.623
1700025B11Rik	0	0	0	0	0	0	0	0	0	0	0	0	0	0	0	0
1700025C18Rik	0	0	0	0	0	0	0	0	0	0	0	0	0	0	0	0
1700025D23Rik	0	0	0	0	0	0	0	0	0	0	0	0	0	0	0	0
1700025F22Rik	0	0	0	0	0	0	0	0	0	0	0	0	0	0	1.87482	0.92154
1700025F24Rik	0	0	0.795983	0	0	0	0	0	0	0	0	0	0.950306	0	0	0
1700025G04Rik	231.158	217.222	222.875	253.372	298.319	314.491	255.473	263.801	251.972	208.492	214.828	188.15	329.756	231.081	300.909	380.596
1700025J12Rik	0	0	0	0	0	0	0	0	0	0	0	0	0	0	0	0
1700025K04Rik	0	0	0	0	0	0	0	0	0	0	0	0	0	0	0	0
1700025K24Rik	0	0	0	0	0	0	0	0	0	0	0	0	0	0	0	0
1700025M24Rik	0	0	0	0	1.60387	0	0	0	0	0	0	0	0.950306	0	0	0
1700025N23Rik	6.88556	14.5385	8.75581	26.0824	9.62319	5.15559	5.53372	18.4953	8.52536	13.5973	5.16413	6.34214	8.55276	5.2718	14.0612	19.3523
1700026D11Rik	0	0	0	0	0	0	0	0	1.89452	0	0	1.05702	0	0	0	0
1700026F02Rik	0	0	0	0	0	0	0	0	0	0	0	0	0	0	0	0
1700026J12Rik	0	0	0	0	0	0	0	0	0	0	0	0	0	0	0	0
1700026J14Rik	2.95096	0	2.38795	0	3.20773	5.15559	1.84457	0	0.947262	1.13311	3.09848	0	1.90061	2.6359	2.81223	0.92154
1700027A15Rik	0	0	0	0	1.60387	1.71853	0	0	0	0	0	0	0	0	0	0
1700027F06Rik	0	0	0	0	0	0	0	0	0	0	0	0	0	0	0	0.92154
1700027F09Rik	0	0	1.59197	0	0.801933	0	0	1.94687	0	0	0	0	0	1.75727	0.937411	0
1700027H10Rik	0	0	0	0	0	0	0	0	0	0	0	0	0	0	0	0
1700027I24Rik	0	0	0	0	0	0	0	0	0	0	0	1.05702	0	0	0	0
1700027J07Rik	1.9673	0	1.59197	1.24202	2.4058	0	3.68915	4.86718	1.89452	0	2.06565	4.22809	5.70184	5.2718	0	0
1700028B04Rik	0	0	0	0	0	0	0	0	0	0	0	0	0	0	0	0
1700028D13Rik	0	0	0	0	0	0	0	0	0	0	0	0	0	0	0	0
1700028E10Rik	16.7221	20.5249	20.6956	26.0824	14.4348	25.7779	16.6012	12.6547	24.6288	20.396	22.7222	13.7413	17.1055	17.5727	20.623	17.5093
1700028I16Rik	0.983652	0	0.795983	0	0	1.71853	1.84457	0	1.89452	0	0	0	1.90061	0.878634	1.87482	0.92154
1700028J19Rik	116.071	101.769	124.173	147.8	139.536	159.823	154.944	167.431	91.8844	151.837	124.972	123.672	180.558	168.698	193.107	169.563
1700028K03Rik	8.85287	15.3937	10.3478	24.8404	13.6329	10.3112	14.7566	15.575	19.8925	18.1298	18.5909	8.45618	9.50306	8.78634	9.37411	19.3523
1700028M03Rik	0	0	0	0	0	0	0	0	0	0	0	0	0	0	0	0
1700028P14Rik	1.9673	0	0	0	0	0	0	0	0	0	1.03283	0	0	0	1.87482	0
1700028P15Rik	0	0	0	0	0	0	0	0	0	0	0	0	0	0	0	0
1700029B22Rik	0	0	0	0	0	0	0	0	0	0	0	0	0	0	0	0
1700029F12Rik	0	0	0	0	0	0	0	0	0	0	0	0	0	0	0	0
1700029H14Rik	1.9673	1.71041	0	0	4.00966	5.15559	0.922286	2.92031	0	2.26622	2.06565	0	2.85092	2.6359	3.74965	6.45078
1700029I15Rik	32.4605	18.8145	27.0634	33.5345	19.2464	22.3409	16.6012	27.2562	16.1035	29.4608	27.8863	25.3686	19.0061	7.90771	24.3727	21.1954
1700029J03Rik	0	0	0	0	0	0	0	0	0	0	0	0	0	0	0	0
1700029J07Rik	154.433	145.385	156.013	163.946	151.565	127.171	142.032	183.006	191.347	163.168	153.891	152.211	136.844	122.13	168.734	160.348
1700029M03Rik	0	0	0	0	0	0	0	0	0	0	0	0	0	0	0	0
1700029M20Rik	0	0	0	0	0	0	0	0	0	0	0	0	0	0	0	0.92154
1700029N11Rik	8.85287	11.9729	20.6956	4.96807	4.00966	20.6223	16.6012	12.6547	25.5761	4.53244	6.19695	16.9124	6.65214	2.6359	8.4367	11.0585
1700029P11Rik	0	0	0	0	0	0	0	0	0	0	0	0	0	0	0	0
1700030A11Rik	0	0	0.795983	1.24202	0.801933	0	0.922286	0.973436	0	0	0	0	0	0	0	0
1700030C10Rik	16.7221	29.9321	14.3277	29.8084	16.8406	20.6223	27.6686	33.0968	32.2069	23.7953	20.6565	31.7107	30.4098	20.2086	17.8108	25.8031
1700030C12Rik	0	0	0	0	0	0	1.84457	0	0	2.26622	0	0	0	0	0	0
1700030C14Rik	0	0	0	0	0	0	0	0	0.947262	0	1.03283	0	0.950306	0	0.937411	0
1700030F04Rik	0	0	0	0	0	0	0	0	0	0	0	0	0	0	0	0
1700030F18Rik	0	0.855204	0.795983	0	0.801933	0	1.84457	0	0	0	0	1.05702	0	0.878634	1.87482	0.92154
1700030J22Rik	115.087	71.8371	72.4345	91.9094	74.5797	56.7115	59.0263	61.3265	55.8885	84.9832	73.3306	76.1057	43.7141	51.8394	57.1821	41.4693
1700030K09Rik	155.417	143.674	150.441	168.915	177.227	195.912	171.545	197.608	124.091	141.639	158.022	128.957	176.757	161.669	164.984	161.27
1700030L20Rik	0	0	0	0	0	0	0	0	0	0	0	0	0	0	0	0
1700030L22Rik	0	0.855204	0	0	1.60387	0	1.84457	0.973436	0	1.13311	0	2.11405	0	0	3.74965	5.52924
1700030M09Rik	0	0	0	0	0	0	0.922286	0	0	0	0	1.05702	0	0.878634	0	0
1700030N03Rik	0	0	0	0	0	0	0	0	0	0	0	0	0	0.878634	0	0
1700030O20Rik	0	0	0	0	0	0	0	0	0.947262	1.13311	0	1.05702	0	0	0	0
1700031A10Rik	0	1.71041	0	0	0	0	0	0	0	0	0	0	0	0	0	0
1700031F05Rik	0	0	0	0	0	0	0	0	0	0	0	0	0	0	0	0
1700031L13Rik	0	0	0	0	0	0	0	0	0	0	0	0	0	0	0	0
1700031M16Rik	0	0	0	0	0	0	0	0	0	0	0	0	0	0	0	0
1700031P21Rik	0	0	0	0	0	0	0	0	0.947262	0	0	0	0	0	0	0
1700034B16Rik	0	0	0	0	0	0	0	0	0	0	0	0	0	0	0	0
1700034E13Rik	0	0	0	0	0	0	0	0	0	0	0	0	0	0	0	0
1700034G24Rik	0	0	0	0	0	0	0	0	0	0	0	0	0	0	0	0
1700034H15Rik	21.6403	21.3801	18.3076	34.7765	69.7681	68.7412	82.0835	85.6624	14.2089	15.8635	17.558	12.6843	88.3785	52.718	74.9929	81.0955
1700034I23Rik	16.7221	11.1177	9.5518	22.3563	12.029	3.43706	9.22286	5.84062	17.998	11.3311	8.2626	12.6843	20.9067	12.3009	9.37411	12.9016
1700034J05Rik	28.5259	51.3122	26.2674	84.4573	40.8986	20.6223	30.4355	41.8578	73.8865	62.321	40.2802	41.2239	38.9626	25.4804	56.2447	72.8017
1700034K08Rik	0	0	0	0	0	0	0	0	0	0	0	0	0	0	0	0
1700034O15Rik	7.86922	9.40724	6.36786	3.72606	9.62319	18.9038	11.9897	13.6281	10.4199	9.06488	4.1313	10.5702	7.60245	5.2718	5.62447	20.2739
1700034P13Rik	16.7221	36.7738	46.167	27.3244	23.256	18.9038	28.5909	28.2297	53.994	29.4608	20.6565	33.8247	30.4098	24.6018	22.4979	28.5677
1700036A12Rik	0	0	0	0	0	0	0	0	0	0	0	0	0.950306	3.51454	0	0.92154
1700036G14Rik	0	0	0	0	0	0	0.922286	0	3.78905	0	0	0	0	0	0	0
1700037C18Rik	177.057	153.937	206.956	181.335	179.633	245.75	134.654	189.82	94.7262	148.437	162.154	193.435	176.757	185.392	154.673	103.212
1700037H04Rik	573.469	466.086	572.312	406.14	364.879	350.58	277.608	370.879	273.759	523.497	480.264	508.428	334.508	410.322	404.024	258.953
1700039E15Rik	0	0	0	0	0.801933	0	0	0	0	0	0	0	0	1.75727	0	0
1700039E22Rik	17.7057	16.2489	5.57188	31.0505	16.0387	10.3112	11.9897	13.6281	11.3671	21.5291	12.3939	17.9694	16.1552	7.02907	18.7482	20.2739
1700039I01Rik	0	0	0	0	0	0	0	0	0	0	0	0	0	0	0	0
1700039M10Rik	11.8038	15.3937	8.75581	19.8723	13.6329	6.87412	14.7566	12.6547	13.2617	12.4642	15.4924	17.9694	11.4037	7.90771	7.49929	11.0585
1700040D17Rik	2.95096	2.56561	0.795983	1.24202	3.20773	0	0.922286	8.76093	1.89452	1.13311	0	3.17107	5.70184	3.51454	1.87482	0
1700040L02Rik	272.472	287.349	288.942	272.002	394.551	412.447	419.64	410.79	349.54	312.738	311.913	297.023	477.054	408.565	402.149	473.672
1700041A01Rik	0	0	0	0	0	0	0	0	0	0	0	0	0	0	0	0
1700041B01Rik	0	0	0	0	0	0	0	0	0	0	0	0	0	0	0	0
1700041C23Rik	0	0	0	0	0	0	0.922286	0	0	0	0	0	0	0.878634	0	0
1700041M19Rik	0	0	0	0	0	0	0	0	0	0	0	0	0	0	0	0
1700042G07Rik	0	0	0	0	0.801933	0	0	0	0	0	0	0	0	0	0	0.92154
1700042G15Rik	0	0	0	0	0	0	0.922286	0	0	0	1.03283	0	0.950306	0	0	0
1700042O10Rik	11.8038	5.13122	8.75581	6.21009	7.21739	6.87412	6.45601	8.76093	3.78905	7.93177	4.1313	4.22809	3.80122	3.51454	6.56188	4.6077
1700044C05Rik	0	0	0	0	0	0	0	0	0	0	0	0	0	0	0	0
1700044K03Rik	0	0	0	0	0	0	0	0	0	0	0	0	0	0	0	0
1700045H11Rik	1.9673	2.56561	4.7759	3.72606	1.60387	0	1.84457	1.94687	0	1.13311	1.03283	5.28511	0	0.878634	0.937411	3.68616
1700046C09Rik	0	0	0	0	0	0	0	0	0	0	0	0	0	0	0	0
1700047A11Rik	9.83652	10.2624	1.59197	8.69413	8.82126	1.71853	5.53372	2.92031	10.4199	9.06488	9.29543	14.7983	12.354	6.15044	13.1238	14.7446
1700047E10Rik	0	0	0	0	0	1.71853	0	0	0	0	0	0	0	0	0	0
1700047G03Rik	0	5.13122	3.97992	3.72606	0.801933	0	0	2.92031	0	0	2.06565	1.05702	0	0	0	0
1700047I17Rik2	0	0	0	0	0	0	0	0	0	0	0	0	0	0	0	0
1700047L14Rik	0	0	0	0	0	0	0	0	0	0	0	0	0	0	0	0
1700047M11Rik	0.983652	0.855204	0.795983	1.24202	1.60387	0	0.922286	1.94687	0.947262	1.13311	2.06565	0	0	0	1.87482	0
1700048B10Rik	0	0	0	0	1.60387	0	0.922286	0	0	2.26622	0	0	0	0.878634	0	0
1700048F04Rik	0	0	0	0	0	0	0	0	0	0	0	0	0	0	0	0
1700048M11Rik	23.6077	4.27602	7.16385	16.1462	13.6329	6.87412	11.0674	6.81405	4.73631	18.1298	11.3611	15.8553	3.80122	7.02907	16.8734	16.5877
1700048O14Rik	0	0.855204	0	1.24202	0	0	0	0	0	0	0	0	0	0	0	0.92154
1700048O20Rik	6.88556	5.98643	2.38795	1.24202	19.2464	17.1853	1.84457	18.4953	7.5781	6.79866	3.09848	11.6273	18.0558	15.8154	15.936	17.5093
1700049E15Rik	0.983652	1.71041	0	0	0	1.71853	0	0.973436	0	0	0	1.05702	0	0.878634	0	0
1700049E17Rik1	0	0	0	0	0	0	0	0	0	0	0	0	0	0	0	0
1700049E17Rik2	0	0	0	0	0	0	0	0	0	0	0	0	0	0	0	0
1700049E22Rik	0	0	0	0	0	0	0	0	0	0	0	0	0	0	0	0
1700049G17Rik	338.376	317.281	303.27	341.555	267.044	259.498	326.489	331.942	475.526	337.667	329.471	338.247	305.048	267.105	324.344	354.793
1700049J03Rik	1.9673	3.42082	5.57188	12.4202	8.01933	0	5.53372	9.73436	6.63084	5.66555	4.1313	5.28511	3.80122	2.6359	5.62447	4.6077
1700049L16Rik	0	0	0	0	0	0	0	0	0	0	0	0	0	0	0	0
1700051A21Rik	1.9673	1.71041	3.97992	0	0.801933	1.71853	0	0	0.947262	1.13311	2.06565	2.11405	0	0.878634	0	0
1700052H01Rik	0	0	3.18393	2.48404	0.801933	0	0	1.94687	0	0	0	0	0	0.878634	0	0.92154
1700052I22Rik	0	0	0	0	0	0	0.922286	0	0	0	0	0	0	0	0	0
1700052K11Rik	90.496	93.2172	75.6184	94.3934	117.884	122.016	121.742	120.706	80.5173	65.7203	79.5275	97.2461	103.583	118.616	127.488	136.388
1700054A03Rik	1.9673	3.42082	3.18393	1.24202	4.00966	3.43706	1.84457	0.973436	2.84179	2.26622	3.09848	4.22809	0.950306	1.75727	3.74965	6.45078
1700054K19Rik	0	0	0	0	0	0	0	0	0	0	0	0	0	0	0	0
1700054M17Rik	0	0	0	0	0	0	0.922286	0	0	0	0	0	0	0	0.937411	0
1700054O19Rik	1.9673	0	0.795983	1.24202	6.41546	6.87412	3.68915	2.92031	0.947262	6.79866	2.06565	0	0.950306	1.75727	1.87482	1.84308
1700055C04Rik	0	0	0	0	0	0	0	0	0	0	0	0	0	0	0	0
1700055D18Rik	32.4605	21.3801	22.2875	34.7765	16.0387	6.87412	19.368	19.4687	26.5233	22.6622	27.8863	24.3115	12.354	18.4513	25.3101	22.117
1700056E22Rik	1.9673	2.56561	3.18393	0	4.00966	6.87412	6.45601	3.89375	3.78905	0	3.09848	1.05702	3.80122	4.39317	2.81223	2.76462
1700057G04Rik	0	0.855204	0	1.24202	0	0	2.76686	0.973436	0	0	1.03283	2.11405	5.70184	0.878634	0	0
1700057H15Rik	0	0	0	0	0	0	0	0	0	0	0	0	0	0	0	0
1700057H21Rik	2.95096	1.71041	3.18393	4.96807	0.801933	0	0	1.94687	0	0	1.03283	2.11405	0	0	2.81223	4.6077
1700060C16Rik	0	0	0	0	0	3.43706	3.68915	1.94687	0	2.26622	0	1.05702	1.90061	2.6359	5.62447	4.6077
1700060C20Rik	0	0.855204	0.795983	0	0	0	0.922286	4.86718	1.89452	0	2.06565	0	0	0.878634	0.937411	0
1700061F12Rik	0	0	0	0	0	0	0	0	0	0	0	0	0	0	0	0
1700061G19Rik	4.91826	16.2489	6.36786	19.8723	11.2271	6.87412	3.68915	11.6812	7.5781	6.79866	12.3939	13.7413	3.80122	14.9368	5.62447	3.68616
1700061I17Rik	0	0	0	0	0	0	0	0	0	0	0	0	0	0	0.937411	0
1700061J23Rik	0	0	0	0	0	0	0	0	0	2.26622	0	0	0	0	0	0
1700062C10Rik	0	0	0	0	0	0	0	0	0	0	0	0	0	0	0	0
1700063A18Rik	0	0	0	0	0	0	0	0	0	0	0	0	0	0	0	0
1700063D05Rik	0	0	0	1.24202	0	1.71853	0	0	0	0	0	0	0	0	0	0
1700063H04Rik	0	1.71041	0.795983	0	0.801933	0	0	0.973436	0	0	0	0	3.80122	0.878634	0	0
1700063H06Rik	0	0	0	0	0	0	0	0	0	0	0	0	0	0	0	0
1700063O14Rik	0	0	0	0	0	0	0	0	0	0	0	0	0	0	0	0
1700064F23Rik	0	0	0	0	0	0	0	0	0	0	0	0	0	0	0	0
1700064J06Rik	0	0	0	0	0	0	0	0	0	0	0	0	0	0	0	0
1700064M15Rik	0	0	0	0	0	0	0	0	0	0	0	0	0	0	0	0
1700065D16Rik	0.983652	2.56561	1.59197	0	0	0	1.84457	0.973436	0	3.39933	1.03283	1.05702	0.950306	1.75727	1.87482	0
1700065I16Rik	0	0	0	0	0	0	0	0	0	0	0	0	0	0	0	0
1700065J11Rik	0	0	0	0	0	0	0	0	0	0	0	0	0.950306	0	0	0
1700065J18Rik	0	0	0	0	1.60387	0	0	2.92031	0	0	1.03283	0	0	0.878634	0.937411	2.76462
1700065L07Rik	0.983652	0	0.795983	1.24202	1.60387	1.71853	5.53372	2.92031	0	0	1.03283	0	1.90061	4.39317	0.937411	6.45078
1700065O20Rik	0.983652	0.855204	0	0	0	0	0	0.973436	0.947262	0	0	0	1.90061	0	0.937411	0
1700066B17Rik	0	0	0	0	0	0	0	0	0	0	0	0	0	0	0	0
1700066B19Rik	1.9673	3.42082	1.59197	2.48404	5.61353	8.59265	4.61143	4.86718	1.89452	3.39933	7.22978	4.22809	10.4534	2.6359	2.81223	2.76462
1700066C05Rik	0	0	0	0	0	0	0	0	0	0	0	0	0	0	0	0
1700066J03Rik	0	0	0	0	0	0	0	1.94687	0	0	0	0	0	0	0	0
1700066M21Rik	340.344	403.656	383.664	219.837	266.242	237.157	275.764	214.156	389.325	215.291	294.355	321.335	206.216	236.353	228.728	296.736
1700066N21Rik	0	0	0	0	0	0	0	0	0	0	0	0	0	0	0	0
1700066O22Rik	0.983652	1.71041	0	1.24202	5.61353	1.71853	3.68915	1.94687	1.89452	1.13311	0	0	0	0.878634	0	0.92154
1700067G17Rik	0	0	0	1.24202	0	0	0	1.94687	0	1.13311	0	2.11405	0	0	0.937411	0
1700067K01Rik	81.6431	87.2308	70.8425	91.9094	93.0242	79.0523	80.2389	90.5296	85.2536	90.6488	103.283	112.044	92.1797	83.4702	98.4282	99.5263
1700067P10Rik	0	0	0	0	0	0	0	0	0	0	0	0	0	0	0	0
1700069L16Rik	0	0	0	0	0	1.71853	0	0	0	0	0	0	0	0	0	0
1700069P05Rik	0	0	0	0	0	0	0	0	0	0	0	0	0	0	0	0
1700071G01Rik	1.9673	3.42082	1.59197	2.48404	3.20773	3.43706	0	1.94687	0	0	5.16413	2.11405	3.80122	0.878634	1.87482	3.68616
1700071K01Rik	0	0	0	0	0	0	0	0	0	0	0	0	0	0	0	0
1700071M16Rik	4.91826	2.56561	4.7759	6.21009	3.20773	5.15559	4.61143	5.84062	17.0507	7.93177	4.1313	6.34214	8.55276	3.51454	14.9986	11.98
1700072B07Rik	0	0	0	0	0	0	0	0	0	0	0	0	0	0	0	0
1700072I22Rik	0	0	0	0	0	0	0	0	0	0	0	0	0	0	0	0
1700072O05Rik	0	0	0	0	0	1.71853	0	0	0	0	0	0	0	0	0	0
1700073E17Rik	0	0	0	0	0	1.71853	2.76686	1.94687	0	1.13311	1.03283	4.22809	1.90061	0.878634	0.937411	2.76462
1700074H08Rik	0.983652	0.855204	0.795983	1.24202	0	0	1.84457	1.94687	0	1.13311	1.03283	1.05702	4.75153	0.878634	2.81223	1.84308
1700074P13Rik	0	0	0	0	0	0	0	0	0	0	0	0	0	0	0	0
1700080E11Rik	0	0	0	0	0	0	0	0	0	0	0	0	0	0	0	0
1700080G11Rik	0	0	0	1.24202	0	0	0	0	0	0	0	0	0	0	0	0
1700080G18Rik	7.86922	8.55204	10.3478	9.93615	8.01933	10.3112	7.37829	10.7078	4.73631	5.66555	8.2626	8.45618	5.70184	7.02907	4.68706	8.29386
1700080N15Rik	0	0	0	0	0.801933	0	0	0.973436	0.947262	0	0	0	0	0	0	0.92154
1700080O16Rik	0	0	0	0	0	0	0	0	0	0	0	0	0	0	0	0
1700081B01Rik	0	0	0	0	0	0	0	0	0	0	0	0	0	0	0	0
1700081H04Rik	0	0	0	0	0	0	0	0	0	0	0	0	0	0	0	0
1700083H02Rik	1.9673	0	0.795983	0	1.60387	0	0	0.973436	0	0	1.03283	3.17107	0	1.75727	0	0.92154
1700084D21Rik	0	0	0	0	0	0	0	0	0	0	0	0	0	0	0	0
1700084E18Rik	11.8038	22.2353	22.2875	14.9042	4.8116	8.59265	7.37829	11.6812	7.5781	15.8635	18.5909	22.1975	6.65214	10.5436	15.936	3.68616
1700084F23Rik	0	0	0	0	0.801933	1.71853	0	0	1.89452	0	1.03283	2.11405	0	0	0	0.92154
1700084J12Rik	0.983652	3.42082	0	3.72606	7.21739	0	2.76686	0.973436	4.73631	9.06488	2.06565	1.05702	2.85092	1.75727	2.81223	3.68616
1700084M14Rik	0	0	0	0	0	0	0	0	0	0	0	0	0	0	0	0
1700085C21Rik	0.983652	3.42082	0	7.45211	1.60387	5.15559	2.76686	10.7078	1.89452	3.39933	0	5.28511	5.70184	0.878634	2.81223	1.84308
1700086D15Rik	24.5913	32.4977	15.1237	59.6169	36.8889	15.4668	22.1349	29.2031	22.7343	38.5257	25.8206	39.1098	20.9067	26.359	41.2461	52.5278
1700086L19Rik	0	0	0.795983	0	0	0	0.922286	0	0	0	0	0	0	0	1.87482	5.52924
1700086O06Rik	48.199	57.2987	50.1469	53.4068	58.5411	53.2744	48.8812	77.8749	72.9392	56.6555	61.9695	72.9346	56.0681	64.1403	36.559	66.3509
1700086P04Rik	9.83652	23.0905	7.16385	2.48404	14.4348	3.43706	11.9897	25.3093	24.6288	13.5973	8.2626	9.51321	13.3043	14.0581	22.4979	15.6662
1700087I21Rik	60.9864	59.8643	45.371	89.4253	44.1063	49.8373	37.8137	74.9546	56.8357	65.7203	60.9367	72.9346	45.6147	37.7813	59.0569	66.3509
1700087M22Rik	1.9673	0	3.97992	0	1.60387	0	1.84457	0.973436	0.947262	2.26622	0	0	0	0	2.81223	2.76462
1700088E04Rik	40.3297	29.0769	39.0032	62.1009	16.8406	29.215	22.1349	30.1765	15.1562	49.8568	27.8863	36.9958	30.4098	21.0872	19.6856	15.6662
1700091H14Rik	0	0	0	0	0	0	0	0	0	0	0	0	0	0	0	0
1700092C02Rik	0	0	0	0	0	0	0	0	0	0	0	0	0	0	0	0
1700092C10Rik	1.9673	1.71041	0.795983	1.24202	1.60387	1.71853	0	0	4.73631	4.53244	0	0	0	0	0	0
1700092E19Rik	0	0	0	0	0	0	0	0	0	0	0	0	0	0	0	0
1700092K14Rik	0	0	0	0	0	0	0	0	0	0	0	0	0	0	0	0
1700092M07Rik	4.91826	2.56561	3.97992	3.72606	4.00966	0	2.76686	1.94687	3.78905	10.198	9.29543	3.17107	2.85092	2.6359	2.81223	1.84308
1700093K21Rik	0.983652	2.56561	3.97992	2.48404	2.4058	0	2.76686	1.94687	4.73631	0	0	1.05702	0.950306	0.878634	0.937411	0.92154
1700094D03Rik	100.333	97.4932	91.538	134.138	118.686	87.645	88.5395	134.334	123.144	124.642	143.563	139.527	77.9251	87.8634	138.737	134.545
1700094J05Rik	0.983652	3.42082	4.7759	1.24202	0.801933	1.71853	0.922286	2.92031	0	1.13311	1.03283	0	0.950306	2.6359	0.937411	2.76462
1700094M23Rik	0	1.71041	0.795983	2.48404	2.4058	3.43706	5.53372	4.86718	1.89452	9.06488	0	6.34214	3.80122	3.51454	10.3115	3.68616
1700094M24Rik	0	0	0	0	0	0	0	0	0	0	0	0	0	0	0	0
1700095A13Rik	0	0	0	0	0	0	0	0	0	0	1.03283	0	0	0	0	0
1700095A21Rik	0	0	1.59197	2.48404	0	0	0	0	0	0	2.06565	0	0	0	0	0.92154
1700095B10Rik	0	0	0	0	0	0	0	0	0	0	0	0	0	0	0	0
1700095J03Rik	0	0	0	0	0	0	0	0	0	0	1.03283	1.05702	0	0	0	0
1700095J12Rik	15.7384	12.8281	15.9197	47.1967	8.01933	5.15559	7.37829	8.76093	8.52536	28.3277	12.3939	17.9694	8.55276	5.2718	14.0612	11.0585
1700096J18Rik	0	1.71041	1.59197	2.48404	0.801933	0	2.76686	0.973436	0.947262	1.13311	3.09848	0	0.950306	3.51454	3.74965	0
1700096K18Rik	46.2316	56.4435	57.3108	49.6807	56.9372	60.1485	64.5601	55.4859	72.9392	61.1879	36.1489	57.0792	50.3662	54.4753	60.9317	67.2724
1700096P03Rik	0	0	0	0	0	0	0	0	0	0	0	0	0	0	0	0
1700097N02Rik	0	0	0	0	0.801933	0	0	0	0	0	0	0	2.85092	0.878634	0	0
1700099I09Rik	4.91826	2.56561	0	8.69413	2.4058	0	0.922286	1.94687	2.84179	9.06488	4.1313	0	1.90061	1.75727	4.68706	1.84308
1700100I10Rik	0	0	0	0	0	0	0	0	0	0	0	0	0	0	0	0
1700100L14Rik	0.983652	1.71041	1.59197	4.96807	1.60387	1.71853	0	2.92031	1.89452	0	0	1.05702	0	0	0.937411	0
1700101G07Rik	0	0	0	0	0	0	0	0	0	0	0	0	0	0	0	0
1700101I11Rik	45.248	44.4706	43.7791	45.9547	32.0773	42.9632	43.3475	39.9109	64.4138	40.7919	18.5909	33.8247	32.3104	33.3881	35.6216	49.7632
1700101O22Rik	0	0	0	0	0	0	0	0	0	0	0	0	0	0	0	0
1700102H20Rik	7.86922	5.98643	5.57188	4.96807	3.20773	5.15559	8.30058	3.89375	8.52536	6.79866	6.19695	8.45618	3.80122	4.39317	2.81223	5.52924
1700102J08Rik	0	0	0	0	0	0	0.922286	0	0	0	0	0	0	0	0.937411	0
1700102P08Rik	4.91826	13.6833	15.1237	17.3883	14.4348	15.4668	8.30058	10.7078	8.52536	23.7953	10.3283	12.6843	7.60245	9.66497	16.8734	13.8231
1700104L18Rik	0	0	0	1.24202	0	0	0	0	0	0	0	0	0	0	0	0
1700105P06Rik	0.983652	0	3.18393	4.96807	4.00966	1.71853	0	1.94687	0.947262	3.39933	0	1.05702	2.85092	3.51454	0	7.37232
1700108F19Rik	3.93461	2.56561	3.97992	4.96807	1.60387	1.71853	2.76686	3.89375	4.73631	2.26622	3.09848	1.05702	0	2.6359	2.81223	4.6077
1700108J01Rik	2.95096	12.8281	6.36786	16.1462	8.01933	3.43706	9.22286	10.7078	0	14.7304	1.03283	7.39916	5.70184	1.75727	5.62447	4.6077
1700108N06Rik	0	0	0	0	0	0	0	0	0	0	0	0	0	0	0	0
1700109G14Rik	0	0	0	0	0	0	0	0	0	0	0	0	0	0	0	0
1700109G15Rik	0	0	0	0	0	0	0	0	0	0	0	0	0	0	0	0
1700109H08Rik	26.5586	52.1674	32.6353	84.4573	31.2754	22.3409	39.6583	45.7515	66.3084	78.1845	33.0504	77.1627	31.3601	21.9659	33.7468	50.6847
1700109I08Rik	0	0	0	0	0	0	0	0	0	0	0	0	0	0	0	0
1700109K24Rik	18.6894	13.6833	11.9397	26.0824	22.4541	13.7482	12.912	24.3359	21.787	22.6622	13.4267	13.7413	23.7577	20.2086	21.5605	42.3908
1700110C19Rik	5.90191	7.69684	5.57188	4.96807	4.8116	3.43706	7.37829	10.7078	4.73631	4.53244	4.1313	10.5702	7.60245	5.2718	5.62447	10.1369
1700110I01Rik	0	0	0	0	0	0	0	0	0	0	0	0	0	0	0	0
1700110I07Rik	0	0	0	0	0	0	0	0	0	0	0	0	0	0	0	0
1700110K17Rik	22.624	21.3801	17.5116	55.8908	21.6522	10.3112	19.368	27.2562	13.2617	35.1264	8.2626	36.9958	21.857	10.5436	37.4965	27.6462
1700111N16Rik	0	0.855204	0	0	0	0	0	0	0	0	2.06565	0	0	0	0.937411	0
1700112D23Rik	9.83652	16.2489	3.18393	12.4202	0.801933	1.71853	2.76686	0	5.68357	5.66555	9.29543	3.17107	0.950306	0.878634	1.87482	0.92154
1700112E06Rik	26.5586	43.6154	28.6554	38.5026	45.7102	27.4965	29.5132	45.7515	21.787	37.3926	22.7222	31.7107	41.8135	36.9026	24.3727	26.7247
1700112H15Rik	0	0	0	0	0	0	0	0	0	0	0	0	0.950306	0	0	0
1700112J05Rik	1.9673	1.71041	0	0	0	0	0	0	0	0	3.09848	2.11405	0	0	0.937411	0.92154
1700112J16Rik	10.8202	13.6833	17.5116	8.69413	10.4251	24.0594	10.1452	15.575	21.787	12.4642	7.22978	10.5702	11.4037	18.4513	18.7482	14.7446
1700112N08Rik	0.983652	0	0	0	0	0	0	0	0	0	0	0	0	0	0	0
1700113A16Rik	43.2807	53.0226	63.6786	65.827	42.5024	42.9632	50.7258	43.8046	40.7323	50.9899	53.7069	46.509	41.8135	33.3881	38.4339	49.7632
1700113B09Rik	0.983652	4.27602	0.795983	0	1.60387	0	2.76686	0.973436	0.947262	3.39933	5.16413	1.05702	0.950306	0.878634	0	0
1700113H08Rik	0	0	0	0	0	0	0	0	0	0	0	0	0	0	0	0
1700116B05Rik	0	0	0	0	0	1.71853	0	0	0	0	0	1.05702	0.950306	0.878634	0.937411	0
1700116H05Rik	0.983652	0	0	0	0	0	0	0.973436	0	0	0	0	0	0	0	0.92154
1700119H24Rik	19.673	22.2353	28.6554	36.0185	21.6522	29.215	17.5234	24.3359	18.9452	36.2595	29.9519	17.9694	25.6583	14.0581	22.4979	23.96
1700120C14Rik	2.95096	1.71041	1.59197	3.72606	6.41546	0	3.68915	3.89375	0.947262	2.26622	1.03283	3.17107	8.55276	2.6359	2.81223	5.52924
1700120E14Rik	37.3788	39.3394	44.575	130.412	40.8986	17.1853	23.9794	40.8843	29.3651	86.1163	39.2474	49.6801	30.4098	25.4804	59.9943	55.2924
1700120G07Rik	0	0.855204	0	0	0.801933	0	0.922286	0	0.947262	1.13311	0	0	0.950306	1.75727	0	0.92154
1700120K04Rik	16.7221	13.6833	25.4715	14.9042	18.4444	18.9038	7.37829	17.5219	9.47262	26.0615	14.4596	4.22809	15.2049	15.8154	21.5605	12.9016
1700121L16Rik	0	0	0	0	0	0	0	0	0	0	0	0	0	0	0	0
1700121N20Rik	0	0	0	0	0	0	0	0	0	0	0	0	0	0	0	0
1700122C19Rik	0	0	0	0	0	0	0	0	0	0	0	0	0	0	0	0
1700122E12Rik	1.9673	5.13122	5.57188	8.69413	1.60387	6.87412	6.45601	3.89375	5.68357	6.79866	3.09848	8.45618	4.75153	6.15044	2.81223	4.6077
1700122H20Rik	0.983652	0	0	0	0.801933	0	0	0	0	2.26622	1.03283	0	1.90061	0	0	0.92154
1700122O11Rik	0	0	0	0	0	0	0	0.973436	0	0	0	0	0	0	0	0
1700123J17Rik	0	0	0	0	0	0	0	0	0	0	0	0	0	0.878634	0	0
1700123K08Rik	0	0.855204	0.795983	2.48404	0.801933	1.71853	3.68915	4.86718	0	2.26622	1.03283	0	0.950306	0	3.74965	0.92154
1700123L14Rik	1.9673	5.98643	0.795983	0	0.801933	1.71853	1.84457	1.94687	3.78905	4.53244	3.09848	5.28511	1.90061	9.66497	2.81223	1.84308
1700123M08Rik	10.8202	20.5249	8.75581	16.1462	12.029	13.7482	11.9897	18.4953	10.4199	7.93177	9.29543	14.7983	19.0061	14.0581	12.1863	23.96
1700123O12Rik	0	0	0	0	0	0	0	0	0	0	0	0	0	0	0	0
1700123O20Rik	641.341	673.045	630.419	496.807	538.899	553.366	689.87	528.576	685.818	507.633	627.958	572.906	505.563	535.088	531.512	589.786
1700123O21Rik	9.83652	5.13122	0.795983	11.1782	8.82126	3.43706	2.76686	4.86718	2.84179	2.26622	1.03283	4.22809	0.950306	12.3009	5.62447	6.45078
1700124L16Rik	0.983652	0	0.795983	1.24202	0.801933	3.43706	4.61143	0.973436	0.947262	4.53244	3.09848	1.05702	0.950306	0.878634	2.81223	0.92154
1700124M09Rik	0	0	0	0	0	0	0	0	0	0	0	0	0	0	0	0
1700125G02Rik	0	0	0	0	0	0	0	0	0	0	0	0	0	0	0	0
1700125G22Rik	1.9673	1.71041	3.18393	3.72606	5.61353	6.87412	0.922286	5.84062	1.89452	4.53244	2.06565	1.05702	1.90061	3.51454	7.49929	5.52924
1700125H03Rik	22.624	11.9729	14.3277	12.4202	4.8116	8.59265	5.53372	0.973436	7.5781	21.5291	15.4924	8.45618	3.80122	5.2718	0.937411	6.45078
1700125H20Rik	0.983652	0	1.59197	1.24202	4.8116	0	0	1.94687	2.84179	0	1.03283	5.28511	2.85092	1.75727	3.74965	1.84308
1700126G02Rik	6.88556	7.69684	4.7759	16.1462	12.8309	1.71853	7.37829	15.575	7.5781	15.8635	6.19695	3.17107	9.50306	7.02907	14.0612	8.29386
1700126H18Rik	0	0	0.795983	0	0	0	1.84457	0	1.89452	1.13311	1.03283	0	0	1.75727	0	0.92154
1700128A07Rik	0	0	0	0	0	0	0	0	0	0	1.03283	0	0	0.878634	0	0
1700128E19Rik	0	0	0	0	0	0	0	0	0	0	0	0	0	0	0	0
1700128F08Rik	0	0	0	0	0	0	0.922286	0	0	0	0	0	0	0	0	0
1700129C05Rik	0	0	0	0	0	0	0	0	0	0	0	0	0	0	0	0
1810006J02Rik	0	3.42082	3.18393	2.48404	4.00966	0	1.84457	3.89375	3.78905	1.13311	1.03283	0	0	4.39317	0.937411	0.92154
1810007C17Rik	0	0	0	0	0	0	0	0	0	0	0	0	0	0	0	0
1810007D17Rik	0	0	0	0	0	0	0	0	0	1.13311	0	0	0	0	0	0
1810008I18Rik	0.983652	0	0	0	0.801933	1.71853	1.84457	0	0	0	1.03283	0	1.90061	0	0	0
1810009A15Rik	4.91826	3.42082	4.7759	6.21009	4.00966	0	0.922286	4.86718	3.78905	6.79866	6.19695	8.45618	2.85092	4.39317	0	2.76462
1810009J06Rik	0	0	0	0	0	0	0	0	0	0	0	0	0	0	0	0
1810010D01Rik	2.95096	1.71041	4.7759	3.72606	3.20773	0	1.84457	3.89375	0.947262	6.79866	5.16413	11.6273	0	3.51454	1.87482	0
1810010H24Rik	31.4769	41.0498	40.5951	36.0185	48.9179	36.0891	55.3372	56.4593	40.7323	43.0582	54.7397	48.6231	51.3165	53.5967	52.495	52.5278
1810011H11Rik	11.8038	17.9593	11.9397	19.8723	22.4541	20.6223	20.2903	12.6547	14.2089	20.396	12.3939	13.7413	10.4534	19.3299	18.7482	17.5093
1810011O10Rik	959.061	817.575	832.598	791.166	903.778	974.406	937.043	923.791	818.435	652.671	824.194	816.022	805.86	832.945	953.347	1063.46
1810012K16Rik	9.83652	11.9729	4.7759	9.93615	10.4251	20.6223	18.4457	9.73436	12.3144	10.198	14.4596	15.8553	8.55276	7.90771	11.2489	13.8231
1810013A23Rik	1.9673	1.71041	1.59197	18.6303	4.00966	0	0	0.973436	0	5.66555	0	2.11405	1.90061	0.878634	1.87482	0.92154
1810013D15Rik	3.93461	2.56561	0	2.48404	1.60387	3.43706	1.84457	0.973436	1.89452	3.39933	6.19695	0	8.55276	7.02907	2.81223	1.84308
1810013L24Rik	2253.55	2303.92	2257.41	2039.39	2160.41	1895.54	2036.41	2047.14	2993.35	2266.22	2229.87	2258.86	1899.66	1960.23	2041.68	2222.75
1810014B01Rik	119.022	133.412	113.03	115.508	166	171.853	171.545	152.829	172.402	134.84	123.939	121.558	149.198	187.149	130.3	166.799
1810018F18Rik	0	0	0	0	0	0	0	0	0	4.53244	1.03283	0	0	0	0	0
1810019D21Rik	419.036	394.249	373.316	459.547	375.304	225.127	221.349	309.553	431.952	462.309	463.738	423.866	245.179	225.809	367.465	331.754
1810019N24Rik	2.95096	4.27602	3.18393	2.48404	1.60387	3.43706	11.0674	6.81405	6.63084	10.198	1.03283	5.28511	9.50306	10.5436	5.62447	9.2154
1810020O05Rik	0	0	0	0	0	0	0	2.92031	4.73631	0	2.06565	1.05702	2.85092	2.6359	1.87482	0.92154
1810021B22Rik	52.1336	45.3258	42.1871	40.9866	48.9179	75.6153	45.192	52.5656	24.6288	47.5906	77.4619	66.5924	50.3662	49.2035	55.3073	23.96
1810021M19Rik	18.6894	18.8145	22.2875	17.3883	8.01933	17.1853	13.8343	19.4687	13.2617	13.5973	17.558	24.3115	14.2546	14.9368	19.6856	8.29386
1810022K09Rik	286.243	383.131	326.353	272.002	270.251	278.402	385.516	317.34	553.201	300.274	366.653	363.616	285.092	295.221	294.347	375.988
1810024B03Rik	23.6077	26.5113	29.4514	27.3244	28.8696	37.8076	24.9017	25.3093	23.6816	29.4608	45.4443	29.5966	25.6583	30.7522	29.0597	11.0585
1810026B05Rik	441.66	479.769	450.526	534.068	466.725	395.262	458.376	485.745	701.921	521.23	535.003	503.143	470.402	408.565	543.699	599.923
1810026J23Rik	1826.64	1869.48	1863.4	1515.26	1605.47	1675.57	1842.73	1623.69	2185.33	1643.01	1869.41	1706.04	1640.23	1616.69	1640.47	1763.83
1810030O07Rik	685.606	766.263	792.799	791.166	807.546	771.62	872.483	825.474	899.899	823.771	718.846	791.71	839.12	810.979	720.869	905.874
1810032O08Rik	159.352	149.661	212.527	218.595	199.681	149.512	161.4	219.023	181.874	205.093	166.285	173.352	152.049	160.79	164.984	196.288
1810034E14Rik	179.025	241.168	257.103	224.805	156.377	149.512	161.4	150.883	218.818	197.161	215.86	252.628	157.751	147.611	149.986	135.466
1810035K13Rik	0	0	0	0	0	0	0	0	0	0	0	0	0	0	0	0
1810037I17Rik	499.695	551.607	578.68	345.281	393.749	666.789	569.051	434.153	495.418	437.38	552.561	559.165	575.886	650.189	450.895	480.122
1810041H14Rik	23.6077	24.8009	25.4715	17.3883	14.4348	20.6223	26.7463	14.6015	27.4706	23.7953	41.313	30.6537	19.9564	18.4513	19.6856	16.5877
1810041L15Rik	95.4143	68.4163	64.4746	50.9228	188.454	108.267	121.742	146.015	50.2049	73.6521	104.315	75.0486	91.2294	114.222	168.734	120.722
1810043G02Rik	484.94	469.507	522.961	520.406	495.594	582.581	454.687	513.974	292.704	478.172	497.822	542.253	470.402	499.943	485.579	262.639
1810043H04Rik	183.943	173.606	232.427	191.271	119.488	190.757	143.877	159.644	101.357	173.366	143.563	197.663	170.105	184.513	149.986	93.0756
1810044D09Rik	64.921	57.2987	91.538	60.8589	39.2947	72.1782	71.0161	58.4062	67.2556	106.512	81.5932	71.8776	72.2233	59.7471	50.6202	35.9401
1810046K07Rik	0	1.71041	0	0	0.801933	0	0	1.94687	1.89452	1.13311	1.03283	3.17107	0	1.75727	0	0
1810049I09Rik	0	0	0	0	0	0	0	0	0	0	0	0	0	0	0	0
1810053B23Rik	0	0	0	0	0.801933	0	0	0	0	0	0	0	0	0	0	0
1810055G02Rik	188.861	188.145	206.16	140.348	217.324	285.276	172.468	172.298	118.408	185.83	189.007	192.378	204.316	183.635	245.602	181.543
1810058I24Rik	912.829	763.697	856.478	683.11	619.092	742.405	756.275	660.963	637.508	652.671	830.391	672.267	720.332	801.314	725.556	660.744
1810062G17Rik	8.85287	7.69684	4.7759	2.48404	4.8116	3.43706	7.37829	9.73436	5.68357	7.93177	10.3283	9.51321	13.3043	18.4513	6.56188	5.52924
1810062O18Rik	3.93461	4.27602	0.795983	3.72606	8.82126	6.87412	11.0674	4.86718	8.52536	5.66555	2.06565	10.5702	4.75153	2.6359	6.56188	7.37232
1810063I02Rik	2.95096	7.69684	3.97992	3.72606	11.2271	17.1853	19.368	2.92031	14.2089	3.39933	5.16413	2.11405	10.4534	10.5436	11.2489	18.4308
1810064F22Rik	5.90191	4.27602	2.38795	6.21009	4.00966	0	13.8343	12.6547	16.1035	2.26622	4.1313	2.11405	15.2049	5.2718	9.37411	15.6662
1810065E05Rik	0	0	0	0	0	0	0	0	0	0	0	0	0	0	0	0
1810073O08Rik	3.93461	5.98643	5.57188	3.72606	12.029	8.59265	8.30058	9.73436	8.52536	4.53244	12.3939	4.22809	8.55276	8.78634	5.62447	7.37232
2010001A14Rik	148.531	165.054	139.297	88.1833	118.686	209.661	209.359	87.6093	155.351	111.045	111.545	107.816	156.801	157.275	141.549	152.976
2010003K11Rik	52.1336	77.8236	67.6586	49.6807	28.0676	39.5262	44.2698	23.3625	64.4138	67.9866	71.2649	66.5924	45.6147	43.9317	40.3087	29.4893
2010005H15Rik	1.9673	4.27602	3.97992	6.21009	5.61353	3.43706	23.0572	11.6812	9.47262	5.66555	8.2626	3.17107	10.4534	2.6359	13.1238	7.37232
2010009K17Rik	4.91826	4.27602	1.59197	3.72606	2.4058	0	0.922286	2.92031	4.73631	5.66555	4.1313	4.22809	0.950306	1.75727	2.81223	5.52924
2010010A06Rik	0.983652	0.855204	0.795983	1.24202	0	0	1.84457	0	0	0	1.03283	1.05702	0.950306	2.6359	1.87482	0
2010016I18Rik	5.90191	2.56561	6.36786	6.21009	17.6425	1.71853	13.8343	13.6281	4.73631	9.06488	11.3611	7.39916	10.4534	5.2718	16.8734	5.52924
2010106C02Rik	7.86922	10.2624	10.3478	24.8404	10.4251	0	4.61143	6.81405	3.78905	21.5291	5.16413	9.51321	6.65214	4.39317	11.2489	6.45078
2010106E10Rik	0	0	0	0	0	0	0	0	0	0	0	0	0	0	0	0
2010107E04Rik	1854.18	2953.87	2728.63	2025.73	2344.05	2637.94	4035.93	2569.87	3488.77	1616.95	2162.74	2141.53	2531.62	2881.04	2263.85	3238.29
2010107G12Rik	0	1.71041	2.38795	2.48404	2.4058	5.15559	3.68915	1.94687	4.73631	1.13311	4.1313	6.34214	6.65214	6.15044	3.74965	1.84308
2010107G23Rik	144.597	146.24	151.237	95.6354	148.358	168.416	148.488	124.6	121.25	120.11	128.07	100.417	132.093	164.305	150.923	117.036
2010109A12Rik	7.86922	10.2624	5.57188	8.69413	2.4058	12.0297	10.1452	10.7078	10.4199	7.93177	5.16413	5.28511	12.354	8.78634	3.74965	3.68616
2010109I03Rik	0	0	2.38795	1.24202	0.801933	1.71853	0.922286	2.92031	1.89452	1.13311	0	1.05702	4.75153	6.15044	0	3.68616
2010110K18Rik	0.983652	0.855204	2.38795	3.72606	0.801933	3.43706	0	0	7.5781	3.39933	1.03283	3.17107	1.90061	0.878634	0.937411	0.92154
2010111I01Rik	1759.75	1849.81	1833.15	2275.38	2226.16	1663.54	1659.19	2253.5	1986.41	2022.6	2188.56	2309.6	1676.34	1742.33	2171.04	2110.33
2010203P06Rik	20.6567	44.4706	27.0634	26.0824	94.628	97.9562	90.3841	73.9812	39.785	29.4608	54.7397	26.4256	96.9312	79.9557	96.5534	90.3109
2010204K13Rik	26.5586	42.7602	58.9027	23.5984	49.7198	75.6153	87.6172	68.1405	40.7323	44.1913	30.9848	44.395	57.9687	67.6548	73.1181	59.9001
2010300C02Rik	50.1663	39.3394	44.575	62.1009	47.314	27.4965	25.824	39.9109	28.4179	40.7919	48.5428	54.9652	42.7638	43.9317	30.9346	28.5677
2010308F09Rik	3.93461	5.13122	3.18393	1.24202	3.20773	8.59265	4.61143	3.89375	5.68357	0	4.1313	3.17107	4.75153	0	3.74965	3.68616
2010310C07Rik	1.9673	3.42082	1.59197	7.45211	1.60387	5.15559	0	3.89375	9.47262	6.79866	1.03283	3.17107	1.90061	4.39317	4.68706	1.84308
2010315B03Rik	745.608	761.131	694.097	649.576	602.251	720.064	807.001	690.166	823.171	580.152	642.417	806.509	680.419	770.562	637.44	730.781
2010320M18Rik	212.469	201.828	244.367	151.526	160.387	261.216	189.991	201.501	124.091	106.512	194.171	186.036	179.608	234.595	157.485	123.486
2010320O07Rik	1.9673	0.855204	0.795983	1.24202	0.801933	1.71853	3.68915	2.92031	0.947262	1.13311	0	1.05702	0.950306	0	2.81223	0
2200002D01Rik	103.283	99.2037	117.805	52.1648	80.1933	94.5191	69.1715	83.7155	41.6795	98.5805	79.5275	103.588	59.8693	68.5335	61.8691	35.9401
2200002J24Rik	2.95096	2.56561	7.95983	0	4.00966	6.87412	6.45601	7.78749	2.84179	4.53244	6.19695	3.17107	2.85092	3.51454	9.37411	3.68616
2210008F06Rik	0.983652	0	1.59197	1.24202	3.20773	1.71853	0	2.92031	1.89452	1.13311	3.09848	7.39916	4.75153	3.51454	2.81223	0
2210010C04Rik	0	0	0	0	0	0	0	0	0	1568.22	53.7069	5.28511	0	0	0	0
2210011C24Rik	132.793	118.873	125.765	106.814	58.5411	54.9929	50.7258	63.2734	148.72	117.843	155.957	127.9	28.5092	51.8394	39.3713	44.2339
2210011K15Rik	0	0	0	0	0	0	0	0	0	0	0	0	0	0	0	0
2210013O21Rik	170.172	206.959	210.14	180.093	268.647	256.061	308.044	272.562	230.185	183.564	207.598	165.953	221.421	278.527	258.726	272.776
2210016F16Rik	1179.4	1246.89	1147.01	1172.47	1032.89	1087.83	958.256	1002.64	1121.56	931.416	1063.81	1051.74	888.536	1019.22	969.283	1021.99
2210016L21Rik	1012.18	913.358	956.772	864.445	933.45	940.035	747.052	842.022	658.347	840.767	926.444	948.15	905.642	830.309	847.42	710.507
2210019I11Rik	0	0	0	0	0	0	0	0	0	0	0	0	0	0	0	0
2210039B01Rik	3.93461	3.42082	3.97992	7.45211	5.61353	5.15559	7.37829	5.84062	4.73631	3.39933	6.19695	6.34214	5.70184	7.90771	5.62447	5.52924
2210404E10Rik	0.983652	1.71041	0	1.24202	3.20773	1.71853	2.76686	2.92031	0.947262	0	3.09848	1.05702	0	3.51454	0.937411	0
2210404O09Rik	49.1826	53.8778	45.371	68.311	64.9565	87.645	88.5395	80.7952	97.568	31.7271	58.871	75.0486	89.3288	82.5916	62.8066	82.0171
2210406O10Rik	11.8038	9.40724	10.3478	7.45211	24.058	5.15559	11.0674	11.6812	9.47262	14.7304	4.1313	9.51321	18.0558	12.3009	12.1863	14.7446
2210407C18Rik	0	0	0	0	0	0	0	0	0	0	0	0	0	0	0	0
2210408F21Rik	319.687	359.186	374.908	356.459	246.193	278.402	267.463	241.412	333.436	305.94	304.683	310.765	222.372	233.717	264.35	324.382
2210408I21Rik	358.049	412.208	343.865	417.318	397.759	445.099	445.464	409.817	552.254	452.111	412.097	376.3	421.936	432.288	363.716	466.299
2210409D07Rik	0	0	0	0	0	0	0	0	0	0	0	0	0	0	0	0
2210409E12Rik	0	1.71041	2.38795	3.72606	4.00966	1.71853	0.922286	0.973436	7.5781	5.66555	2.06565	2.11405	2.85092	2.6359	3.74965	1.84308
2210414B05Rik	0	0	0	0	0	0	0	0	0	0	0	0	0	0	0	0
2210416O15Rik	15.7384	14.5385	11.1438	26.0824	16.8406	18.9038	8.30058	25.3093	9.47262	13.5973	20.6565	16.9124	23.7577	14.0581	14.9986	17.5093
2210417A02Rik	0	0	0.795983	0	0	0	0	0	0	2.26622	0	0	0	0	0	0
2210418O10Rik	0	0	0	0	1.60387	0	0	0	0	1.13311	0	0	0	0.878634	0.937411	0
2210420H20Rik	0	0	0	0	0	0	0	0	0	0	0	0	0	0	0	0
2300002M23Rik	0.983652	3.42082	0.795983	0	0	0	0	1.94687	1.89452	1.13311	0	1.05702	0	1.75727	1.87482	1.84308
2300003K06Rik	0	0	0	0	0	0	0	0	0	0	0	0	0	0	0	0
2300009A05Rik	255.75	325.833	288.942	247.162	148.358	185.601	172.468	172.298	268.075	202.827	274.731	282.225	172.005	165.183	172.484	179.7
2310001H17Rik	109.185	110.321	87.5581	114.266	87.4107	137.482	152.177	120.706	126.933	70.2528	89.8558	87.7329	103.583	120.373	87.1792	149.29
2310001K24Rik	0	4.27602	3.18393	3.72606	2.4058	1.71853	0.922286	3.89375	0.947262	1.13311	8.2626	2.11405	8.55276	1.75727	0	3.68616
2310002D06Rik	0.983652	0	0	0	0	0	0	0	0	0	0	0	0	0	0	0
2310002F09Rik	0	0.855204	0.795983	0	1.60387	3.43706	0.922286	2.92031	0	0	0	0	0.950306	2.6359	0	0.92154
2310002L09Rik	0	0	0	0	0	0	0	0	0	0	0	0	0	0	0	0
2310003N18Rik	0	0	0	0	0	0	0	0	0	0	0	0	0	0	0	0
2310005A03Rik	2.95096	3.42082	3.97992	6.21009	3.20773	3.43706	3.68915	0	2.84179	5.66555	2.06565	4.22809	0.950306	2.6359	0.937411	9.2154
2310005E17Rik	0.983652	0	0.795983	1.24202	0	0	0	0	0	1.13311	1.03283	1.05702	0	0	0.937411	0
2310007B03Rik	71.8066	69.2715	58.1068	62.1009	204.493	206.223	163.245	198.581	47.3631	66.8535	56.8054	57.0792	141.596	144.975	186.545	87.5463
2310008N11Rik	0.983652	1.71041	4.7759	2.48404	1.60387	1.71853	2.76686	1.94687	1.89452	0	2.06565	2.11405	3.80122	1.75727	1.87482	0
2310009A05Rik	199.681	178.738	223.671	176.367	172.416	197.631	219.504	187.873	200.82	152.97	195.204	188.15	143.496	182.756	171.546	173.25
2310009B15Rik	52.1336	36.7738	64.4746	68.311	48.9179	58.43	48.8812	56.4593	22.7343	43.0582	36.1489	56.0222	38.0122	51.8394	34.6842	29.4893
2310010J17Rik	121.973	93.2172	100.294	100.604	67.3623	115.141	106.063	80.7952	100.41	74.7852	98.1184	102.531	97.8815	93.1352	89.9915	78.3309
2310011J03Rik	617.734	608.905	703.649	488.113	583.005	632.419	584.73	576.274	335.331	620.944	551.529	604.617	559.73	600.107	523.075	410.085
2310014F06Rik	3.93461	8.55204	6.36786	9.93615	14.4348	13.7482	11.0674	10.7078	8.52536	19.2629	8.2626	8.45618	11.4037	4.39317	9.37411	14.7446
2310015A10Rik	156.401	165.91	180.688	259.582	198.879	113.423	179.846	182.033	167.665	193.762	182.81	177.58	151.099	144.096	187.482	154.819
2310015A16Rik	41.3134	47.0362	38.2072	43.4707	120.29	221.69	180.768	139.201	31.2597	32.8602	27.8863	30.6537	192.912	227.566	109.677	144.682
2310015D24Rik	0	0	0	0	2.4058	0	0	0	0	0	0	0	0	1.75727	0	0.92154
2310015K22Rik	3.93461	0.855204	2.38795	0	0	0	0.922286	0	0.947262	3.39933	0	3.17107	0	0	0	0
2310016D03Rik	0	1.71041	0	0	0	0	0	0	0	0	0	0	0	0	0	0
2310016D23Rik	0	0	0	0	0	0	0	0	2.84179	0	0	0	0	0	0	0
2310016G11Rik	55.0845	47.0362	66.0666	65.827	22.4541	48.1188	32.28	24.3359	56.8357	56.6555	56.8054	49.6801	38.9626	44.8103	18.7482	27.6462
2310020H05Rik	0	0	0	0	0.801933	0	0	0	0	0	1.03283	0	0	0.878634	0.937411	0.92154
2310022A10Rik	155.417	138.543	158.401	168.915	183.643	175.29	122.664	162.564	94.7262	160.902	185.909	165.953	145.397	159.033	156.548	121.643
2310022B05Rik	845.941	776.525	932.096	1027.15	928.638	811.146	659.435	804.058	636.56	1033.4	907.853	955.549	813.462	806.586	906.477	658.901
2310026I22Rik	0	0	0	0	0	0	0	0	0	0	0	0	0	0	0	0
2310030A07Rik	0	0	0	0	0	0	0.922286	0.973436	0	2.26622	0	0	0	0	0	0.92154
2310030G06Rik	1304.32	1447.01	1287.9	996.099	732.164	893.635	876.172	740.785	1670.02	1263.42	1429.43	1217.69	666.165	709.936	718.057	819.249
2310033P09Rik	315.752	229.195	300.086	196.239	246.995	329.958	268.385	262.828	257.655	296.875	301.585	320.278	269.887	238.11	263.413	190.759
2310034C09Rik	0	0	0	0	0	0	0	0	0	0	0	0	0	0	0	0
2310034G01Rik	18.6894	17.9593	19.1036	27.3244	22.4541	32.6521	25.824	35.0437	16.1035	20.396	23.755	11.6273	30.4098	28.9949	35.6216	23.0385
2310034O05Rik	0	0	0	0	0.801933	0	0	0	0	0	0	0	0	0.878634	0	0
2310034P14Rik	40.3297	31.6425	25.4715	24.8404	36.087	41.2447	40.5806	39.9109	20.8398	33.9933	29.9519	25.3686	28.5092	44.8103	33.7468	34.097
2310035C23Rik	1367.28	1448.72	1400.93	1515.26	1327.2	1208.13	1494.1	1346.26	1911.58	1485.51	1471.78	1477.72	1173.63	1285.44	1213.01	1400.74
2310036O22Rik	1033.82	1075.85	1062.64	916.61	895.759	776.775	885.395	897.508	1029.67	824.904	950.199	962.948	820.114	827.673	855.857	904.952
2310039H08Rik	484.94	492.597	601.763	545.246	199.681	402.136	249.017	240.439	379.852	407.919	424.491	522.169	236.626	272.377	214.667	225.777
2310039L15Rik	0	0	0	0	0	0	0	0	0	0	0	0	0	0	0	0
2310040G24Rik	14.7548	13.6833	8.75581	21.1143	25.6618	25.7779	32.28	23.3625	13.2617	9.06488	21.6893	11.6273	33.2607	24.6018	33.7468	23.0385
2310043L19Rik	11.8038	11.1177	6.36786	6.21009	1.60387	3.43706	6.45601	1.94687	17.0507	10.198	11.3611	14.7983	6.65214	8.78634	3.74965	5.52924
2310043O21Rik	0	0	0	1.24202	1.60387	0	0.922286	0	0.947262	0	0	1.05702	0	1.75727	0.937411	1.84308
2310045n01rik-mef2b	0	0	0	0	0	0	0	0	0	0	0	0	0	0	0	0
2310047D07Rik	6.88556	4.27602	3.18393	8.69413	6.41546	3.43706	1.84457	0	1.89452	5.66555	2.06565	5.28511	0.950306	1.75727	0	2.76462
2310050C09Rik	0	0	0	0	0	0	0	0	0	0	0	0	0	0	0	0
2310057J18Rik	0	0	0	0	0	0	0	0	0	0	0	0	0	0	0	0
2310057M21Rik	211.485	207.815	215.711	212.385	241.382	197.631	207.514	233.625	264.286	196.028	256.141	253.686	208.117	171.334	245.602	238.679
2310057N15Rik	0	0	0	0	0	0	0	0	0	0	0	0	0	0	0	0
2310061I04Rik	572.486	436.154	522.165	661.996	542.106	546.492	367.07	534.417	359.012	632.275	521.577	563.393	551.178	531.574	545.573	447.869
2310061N02Rik	0	0	0	0	0	0	0	0	0	0	0	0	0	0	0	0
2310065F04Rik	0	0	0	0	0	0	0	0	0	0	0	0	0	0	0	0
2310067E19Rik	184.927	282.217	220.487	480.661	242.986	195.912	226.882	260.881	237.763	379.592	168.35	257.914	262.285	225.809	302.784	374.145
2310068J16Rik	6.88556	3.42082	7.16385	8.69413	4.00966	12.0297	12.912	5.84062	9.47262	4.53244	2.06565	5.28511	6.65214	4.39317	2.81223	6.45078
2310069B03Rik	0	0.855204	0	1.24202	3.20773	1.71853	2.76686	0	1.89452	0	2.06565	2.11405	0.950306	0.878634	2.81223	0
2310069G16Rik	6.88556	2.56561	3.97992	6.21009	4.00966	1.71853	6.45601	2.92031	2.84179	2.26622	2.06565	3.17107	3.80122	1.75727	1.87482	6.45078
2310075C17Rik	0	0	0	0	0	0	0	0	0	0	0	0	0	0	0	0
2310075K07Rik	20.6567	26.5113	16.7156	14.9042	24.8599	25.7779	23.0572	22.389	14.2089	14.7304	16.5252	17.9694	24.708	35.1454	26.2475	18.4308
2310079G19Rik	0	0	0	0	0	0	0	0	0	0	0	0	0	0	0	0
2310081J21Rik	13.7711	11.9729	9.5518	2.48404	6.41546	0	1.84457	6.81405	4.73631	6.79866	6.19695	4.22809	1.90061	2.6359	5.62447	10.1369
2400006E01Rik	0.983652	0	0	2.48404	2.4058	0	0	0.973436	2.84179	0	0	1.05702	0.950306	0.878634	0	0
2410002F23Rik	366.902	342.937	335.109	426.012	427.43	395.262	357.847	478.931	385.536	471.374	426.557	464.033	438.091	398.021	419.96	414.693
2410003L11Rik	16.7221	16.2489	23.0835	17.3883	36.087	36.0891	30.4355	23.3625	22.7343	22.6622	11.3611	25.3686	43.7141	37.7813	14.0612	23.0385
2410004B18Rik	306.899	321.557	290.534	270.76	266.242	262.935	257.318	260.881	280.39	223.223	259.239	250.514	209.067	233.717	250.289	274.619
2410004I01Rik	1.9673	0.855204	0	0	0.801933	0	0	0	0.947262	1.13311	2.06565	1.05702	0	0.878634	2.81223	3.68616
2410004P03Rik	1.9673	0	0.795983	0	0	1.71853	0	0	0	1.13311	1.03283	0	0	4.39317	0	0.92154
2410006H16Rik	103.283	106.045	100.294	111.782	68.9662	168.416	126.353	109.025	115.566	78.1845	95.0199	96.1891	135.894	141.46	78.7425	83.8602
2410012E07Rik	0	0	0	0	0	0	0	0	0	0	0	0	0	0	0	0
2410015M20Rik	2290.93	2575.02	2567.05	1997.17	1772.27	2234.09	2540.9	2106.52	1644.45	1605.62	1969.6	2013.63	2309.24	2412.73	1977.94	1890.08
2410016O06Rik	84.5941	83.81	72.4345	58.3749	76.1836	42.9632	74.7052	59.3796	69.1501	37.3926	72.2978	70.8205	53.2171	77.3198	62.8066	58.057
2410017I17Rik	0	0	0	0	0	0	0	0	0	0	0	0	0	0	0	0
2410018L13Rik	0	0	0	0	0	0	0	0	0	0	0	0	0	0	0	0.92154
2410021H03Rik	2.95096	6.84163	0	18.6303	7.21739	0	0.922286	9.73436	1.89452	5.66555	5.16413	4.22809	3.80122	4.39317	12.1863	12.9016
2410022M11Rik	74.7576	66.7059	59.6987	52.1648	52.9276	84.2079	75.6275	58.4062	86.2009	60.0548	73.3306	58.1363	76.9748	76.4412	45.9332	70.9586
2410080I02Rik	12.7875	11.1177	21.4915	37.2606	24.058	13.7482	22.1349	24.3359	23.6816	26.0615	25.8206	21.1405	22.8073	21.0872	24.3727	31.3324
2410089E03Rik	1043.65	1010.85	944.832	1323.99	1068.98	1163.44	1106.74	1222.64	1091.25	1297.41	1046.25	1069.71	1251.55	1172.98	1177.39	1128.89
2410124H12Rik	0	0	0	0	0	0	0	0	0	0	0	0	0	0	0	0
2410131K14Rik	477.071	444.706	444.955	491.839	406.58	378.076	408.573	431.232	372.274	414.718	474.067	379.471	403.88	433.167	390.901	375.067
2410137M14Rik	0	0	0	0	0	0	0	0	0	0	0	0	0	0	0	0
2410141K09Rik	0	0	0	0	0	0	0	0	0	0	0	0	0	0	0	0
2500002B13Rik	187.878	191.566	193.424	156.494	78.5894	97.9562	146.644	100.264	246.288	164.301	207.598	195.549	91.2294	91.3779	92.8037	118.879
2500004C02Rik	100.333	113.742	82.7822	96.8775	123.498	151.231	124.509	144.069	140.195	103.113	118.775	115.216	101.683	109.829	124.676	135.466
2510002D24Rik	329.523	353.199	351.029	257.098	229.353	245.75	267.463	210.262	381.747	350.131	366.653	381.585	229.024	250.411	208.105	223.934
2510003B16Rik	1.9673	4.27602	2.38795	3.72606	8.01933	1.71853	4.61143	1.94687	4.73631	5.66555	4.1313	3.17107	1.90061	3.51454	10.3115	5.52924
2510009E07Rik	1704.67	1541.93	1529.88	1465.58	1466.73	1661.82	1730.21	1464.05	1804.53	1666.8	1679.37	1595.05	1519.54	1653.59	1522.36	1495.66
2510039O18Rik	1182.35	1086.96	1263.23	1246.99	996.802	1106.73	758.119	998.746	562.674	1076.45	1051.42	1132.07	909.443	1016.58	944.911	535.415
2610001J05Rik	720.033	791.064	772.104	351.491	658.387	881.605	1024.66	667.777	1003.15	600.548	774.619	654.297	799.208	822.401	716.182	850.582
2610002M06Rik	607.897	657.652	619.275	639.64	658.387	747.56	806.078	597.69	929.264	667.401	624.859	703.977	768.798	716.087	637.44	715.115
2610005L07Rik	70.823	58.1539	66.8626	98.1195	84.2029	53.2744	45.192	71.0608	68.2029	88.3825	61.9695	66.5924	59.8693	65.0189	79.68	68.194
2610008E11Rik	654.129	756	606.539	604.863	805.942	697.723	856.804	870.252	937.79	677.599	707.485	818.136	770.698	780.227	725.556	936.285
2610016A17Rik	8.85287	11.9729	4.7759	3.72606	12.029	17.1853	14.7566	9.73436	9.47262	10.198	13.4267	9.51321	13.3043	22.8445	14.0612	12.9016
2610020C07Rik	26.5586	20.5249	24.6755	34.7765	35.285	13.7482	35.0469	33.0968	40.7323	40.7919	13.4267	47.566	32.3104	27.2377	42.1835	46.077
2610020H08Rik	226.24	242.878	198.996	396.204	145.952	103.112	128.198	159.644	231.132	265.148	183.843	248.4	140.645	128.281	173.421	190.759
2610021A01Rik	318.703	273.665	281.778	286.906	338.416	314.491	348.624	339.729	311.649	233.421	269.567	233.602	328.806	351.454	324.344	366.773
2610027F03Rik	0	0	0	0	0	0	0	0	0	0	0	0	0	0	0	0
2610027K06Rik	43.2807	43.6154	50.1469	84.4573	54.5314	51.5559	35.0469	69.114	48.3104	65.7203	47.51	45.452	40.8632	43.9317	70.3058	61.7432
2610028E06Rik	0	0	0	0	0	0	0	0	0	0	0	0	0	0	0	0.92154
2610028H24Rik	3.93461	3.42082	0	3.72606	0.801933	3.43706	0	6.81405	1.89452	0	1.03283	7.39916	3.80122	4.39317	2.81223	1.84308
2610035D17Rik	142.63	117.163	200.588	117.992	356.058	317.928	220.426	287.164	226.396	163.168	207.598	285.396	359.216	380.449	123.738	220.248
2610035F20Rik	0	0	0	0	0	0	0	0	0	0	0	0	0	0	0	0
2610037D02Rik	0	0	0	1.24202	0	0	0	0	0.947262	1.13311	0	1.05702	0.950306	3.51454	0	0
2610042L04Rik	0	0	0	1.24202	0	0	0	0	0	0	0	0	0	0	0	0
2610044O15Rik8	165.254	183.869	183.076	151.526	144.348	202.786	200.136	190.794	194.189	142.772	144.596	180.751	194.813	193.299	147.174	198.131
2610203C22Rik	69.8393	94.0724	67.6586	161.462	75.3817	42.9632	55.3372	84.689	141.142	164.301	77.4619	94.075	82.6766	52.718	68.431	99.5263
2610206C17Rik	0.983652	0.855204	0.795983	0	1.60387	1.71853	2.76686	0.973436	3.78905	1.13311	3.09848	0	3.80122	1.75727	0.937411	2.76462
2610300M13Rik	0	0	0	0	0	0	0	0	0	0	0	0	0	0	0	0
2610301B20Rik	292.145	365.172	348.641	285.664	280.676	274.965	346.78	309.553	427.215	304.806	303.651	320.278	276.539	253.925	309.346	322.539
2610305D13Rik	30.4932	41.0498	39.7992	23.5984	31.2754	37.8076	67.3269	36.0171	52.0994	29.4608	34.0832	58.1363	52.2668	38.6599	32.8094	46.9985
2610306M01Rik	134.76	194.986	157.605	120.476	136.329	163.26	153.1	154.776	104.199	109.912	118.775	131.071	134.943	160.79	121.863	117.957
2610307P16Rik	54.1009	82.9548	60.4947	73.2791	72.1739	89.3635	88.5395	91.503	61.5721	72.519	70.2321	77.1627	83.6269	94.8925	103.115	101.369
2610316D01Rik	0	0.855204	0	0	0	0	0	0	0	0	0	0	0	0.878634	0.937411	0
2610318N02Rik	0	0.855204	0	1.24202	1.60387	0	0.922286	0.973436	1.89452	1.13311	0	0	1.90061	0.878634	2.81223	0
2610507B11Rik	24218.5	23714.8	21993.8	20870.9	19673.8	21340.7	21013.4	19506.7	22653.8	21489.4	21998.1	21081.3	21693.6	22635.4	20645.5	19518.2
2610507I01Rik	301.981	310.439	335.109	267.034	380.918	338.55	425.174	413.71	431.952	320.67	336.701	323.449	342.11	363.755	358.091	392.576
2610524H06Rik	36.3951	36.7738	40.5951	27.3244	46.5121	41.2447	66.4046	61.3265	65.3611	50.9899	41.313	35.9388	55.1178	59.7471	54.3699	76.4878
2610528A11Rik	0.983652	0.855204	1.59197	3.72606	0.801933	0	2.76686	2.92031	5.68357	1.13311	2.06565	1.05702	1.90061	3.51454	3.74965	0.92154
2610528J11Rik	1222.68	1264.85	1208.3	1042.05	773.865	938.317	918.597	732.024	953.893	959.744	1060.71	1086.62	874.282	936.624	764.928	652.45
2700012I20Rik	37.3788	50.457	45.371	64.585	47.314	56.7115	32.28	38.9375	62.5193	70.2528	61.9695	76.1057	38.9626	31.6308	45.9332	53.4493
2700038G22Rik	6.88556	16.2489	13.5317	16.1462	12.8309	15.4668	9.22286	13.6281	13.2617	15.8635	13.4267	8.45618	3.80122	10.5436	27.1849	20.2739
2700046A07Rik	1.9673	0.855204	0.795983	1.24202	1.60387	10.3112	3.68915	9.73436	0.947262	1.13311	3.09848	0	8.55276	9.66497	7.49929	4.6077
2700046G09Rik	142.63	119.729	125.765	83.2152	105.053	101.393	126.353	94.4233	120.302	113.311	154.924	119.444	83.6269	92.2566	91.8663	104.134
2700049A03Rik	362.968	401.946	379.684	411.108	368.889	407.291	377.215	390.348	516.258	427.182	403.835	456.634	399.129	409.443	376.839	444.182
2700054A10Rik	38.3624	36.7738	35.0233	37.2606	61.7488	22.3409	34.1246	34.0703	41.6795	52.123	50.6084	41.2239	43.7141	42.1744	34.6842	32.2539
2700060E02Rik	1473.51	1677.05	1539.43	1166.26	1255.02	1740.87	1796.61	1343.34	1873.68	1122.91	1457.32	1428.04	1532.84	1433.93	1335.81	1751.85
2700062C07Rik	240.011	259.127	188.648	232.257	218.126	240.594	228.727	212.209	224.501	216.424	241.681	227.26	173.906	218.78	191.232	238.679
2700069I18Rik	0	0	0	0	0	0	0	0.973436	0	0	0	0	0	0	0	0.92154
2700070H01Rik	0	0.855204	0	2.48404	0	0	0	0.973436	0.947262	0	0	1.05702	1.90061	0.878634	1.87482	0.92154
2700081O15Rik	320.671	270.244	348.641	296.842	386.532	324.802	328.334	365.039	276.601	356.929	343.931	363.616	349.713	304.886	346.842	339.127
2700089I24Rik	0	0	0	0	2.4058	3.43706	2.76686	1.94687	0	0	0	0	0.950306	0.878634	0.937411	1.84308
2700094K13Rik	133.777	113.742	137.705	130.412	95.43	130.608	141.11	115.839	106.093	81.5839	109.479	123.672	129.242	153.761	114.364	111.506
2700097O09Rik	146.564	164.199	148.053	140.348	127.507	135.764	158.633	119.733	157.246	114.444	145.628	121.558	134.943	126.523	128.425	169.563
2700099C18Rik	4.91826	5.98643	0.795983	6.21009	3.20773	3.43706	4.61143	16.5484	8.52536	6.79866	5.16413	7.39916	17.1055	7.02907	14.0612	9.2154
2810001G20Rik	72.7903	77.8236	64.4746	57.1329	80.1933	87.645	89.4618	74.9546	89.0427	71.3859	85.7245	67.6495	67.4717	98.407	67.4936	81.0955
2810002D19Rik	179.025	151.371	124.173	115.508	138.734	163.26	189.069	154.776	177.138	135.973	149.76	136.356	148.248	171.334	170.609	213.797
2810004N23Rik	694.458	720.082	642.358	469.483	503.614	513.84	604.098	528.576	628.035	538.227	619.695	664.867	519.818	604.5	532.45	579.649
2810006K23Rik	229.191	263.403	268.246	201.207	275.063	261.216	266.541	250.173	228.29	185.83	246.845	201.891	215.72	250.411	240.915	246.051
2810013P06Rik	351.164	401.091	407.543	380.058	345.633	469.158	471.288	410.79	459.422	330.868	323.274	386.87	448.545	506.972	339.343	391.655
2810021J22Rik	314.769	293.335	294.514	317.957	324.783	362.61	338.479	346.543	369.432	320.67	333.603	298.08	328.806	331.245	316.845	303.187
2810025M15Rik	313.785	364.317	369.336	285.664	272.657	329.958	353.236	269.642	320.175	269.68	307.782	298.08	343.061	313.672	316.845	282.913
2810029C07Rik	239.027	231.76	174.32	258.34	131.517	147.794	176.157	175.219	285.126	233.421	275.764	237.83	149.198	132.674	149.986	166.799
2810030D12Rik	13.7711	5.98643	7.16385	9.93615	8.01933	3.43706	3.68915	13.6281	14.2089	10.198	12.3939	6.34214	5.70184	1.75727	7.49929	7.37232
2810032G03Rik	2.95096	4.27602	3.18393	6.21009	18.4444	39.5262	39.6583	17.5219	5.68357	3.39933	8.2626	5.28511	28.5092	26.359	26.2475	36.8616
2810039B14Rik	32.4605	32.4977	26.2674	37.2606	27.2657	25.7779	21.2126	30.1765	10.4199	16.9966	29.9519	12.6843	23.7577	15.8154	17.8108	12.9016
2810047C21Rik1	0	0	0	0	0	0	0	0	0	0	0	0	0	0	0	0
2810049E08Rik	0	0.855204	0	3.72606	2.4058	5.15559	0.922286	0.973436	0	2.26622	0	1.05702	2.85092	0.878634	0	1.84308
2810403A07Rik	1804.02	1956.71	1893.64	2009.59	1583.82	1443.56	1544.83	1609.09	2214.7	1816.37	1807.44	1859.3	1370.34	1420.75	1618.91	1811.75
2810403D21Rik	24.5913	16.2489	25.4715	22.3563	26.4638	54.9929	26.7463	29.2031	34.1014	20.396	22.7222	34.8818	35.1613	37.7813	21.5605	17.5093
2810404M03Rik	0	0	0	0	0	0	0	0	0	0	0	0	0	0	0	0
2810405F15Rik	9.83652	2.56561	2.38795	3.72606	5.61353	1.71853	6.45601	7.78749	0.947262	6.79866	4.1313	7.39916	3.80122	6.15044	11.2489	5.52924
2810407A14Rik	0.983652	4.27602	0	4.96807	0.801933	1.71853	0	3.89375	0.947262	1.13311	3.09848	1.05702	0.950306	0	3.74965	2.76462
2810408A11Rik	39.3461	48.7466	43.7791	39.7446	32.8792	44.6818	35.0469	43.8046	52.0994	58.9217	58.871	54.9652	52.2668	42.1744	35.6216	35.9401
2810408B13Rik	1.9673	4.27602	0	2.48404	5.61353	13.7482	3.68915	4.86718	0.947262	3.39933	3.09848	3.17107	11.4037	4.39317	3.74965	4.6077
2810408I11Rik	5.90191	16.2489	7.95983	16.1462	9.62319	5.15559	11.9897	4.86718	17.0507	7.93177	16.5252	5.28511	9.50306	8.78634	8.4367	8.29386
2810410L24Rik	89.5123	38.4842	57.3108	42.2286	68.1643	80.7709	71.0161	96.3702	38.8378	49.8568	76.4291	64.4784	60.8196	76.4412	74.9929	59.9001
2810417H13Rik	21.6403	34.2082	19.8996	28.5664	22.4541	25.7779	31.3577	35.0437	54.9412	23.7953	20.6565	41.2239	38.9626	19.3299	19.6856	38.7047
2810428I15Rik	332.474	224.063	433.811	327.893	211.71	240.594	131.887	224.864	71.9919	284.41	225.156	291.738	174.856	168.698	186.545	91.2325
2810429I04Rik	0	2.56561	3.18393	0	7.21739	3.43706	2.76686	3.89375	3.78905	3.39933	3.09848	4.22809	0.950306	1.75727	4.68706	1.84308
2810433D01Rik	11.8038	10.2624	11.1438	12.4202	19.2464	17.1853	19.368	23.3625	18.9452	19.2629	18.5909	13.7413	19.0061	21.0872	23.4353	22.117
2810442N19Rik	9.83652	12.8281	10.3478	37.2606	15.2367	12.0297	20.2903	24.3359	17.998	31.7271	9.29543	15.8553	27.5589	18.4513	21.5605	27.6462
2810454H06Rik	14.7548	7.69684	4.7759	9.93615	13.6329	15.4668	16.6012	9.73436	13.2617	11.3311	7.22978	4.22809	16.1552	14.9368	10.3115	11.0585
2810459M11Rik	50.1663	55.5883	39.0032	60.8589	5.61353	12.0297	11.0674	6.81405	59.6775	44.1913	50.6084	46.509	11.4037	14.0581	1.87482	2.76462
2810468N07Rik	0.983652	1.71041	0.795983	2.48404	1.60387	5.15559	9.22286	6.81405	7.5781	7.93177	3.09848	2.11405	1.90061	6.15044	2.81223	4.6077
2810471M01Rik	0	0	0	0	0	0	0	0	0	0	0	0	0.950306	0	0	0
2810474O19Rik	2038.13	1523.97	1741.61	2716.29	1681.65	1679	1720.06	1828.11	3478.35	2256.02	1477.97	1567.57	1537.6	1809.11	1611.41	1980.39
2900005J15Rik	53.1172	47.0362	39.7992	64.585	42.5024	25.7779	28.5909	34.0703	45.4686	67.9866	61.9695	58.1363	32.3104	30.7522	42.1835	52.5278
2900009J06Rik	4.91826	5.13122	3.18393	3.72606	3.20773	0	0	6.81405	5.68357	5.66555	6.19695	9.51321	0.950306	1.75727	8.4367	6.45078
2900011O08Rik	1.9673	3.42082	3.97992	2.48404	4.00966	6.87412	6.45601	4.86718	10.4199	5.66555	10.3283	6.34214	7.60245	4.39317	7.49929	5.52924
2900026A02Rik	2945.05	2367.2	2544.76	4402.96	2426.65	2405.94	1792	2430.67	1372.58	3372.13	2622.34	2783.14	2524.96	2507.62	2495.39	1625.6
2900040C04Rik	0	0	0	0	0	0	0	0	0	0	0	0	0.950306	0	0	0
2900041M22Rik	0.983652	1.71041	7.16385	6.21009	2.4058	0	2.76686	4.86718	2.84179	2.26622	0	2.11405	3.80122	3.51454	5.62447	7.37232
2900052N01Rik	0.983652	1.71041	0.795983	1.24202	1.60387	0	0	0	0.947262	0	1.03283	2.11405	0.950306	0.878634	0	0.92154
2900055J20Rik	0	0	0	0	0	0	0	0	0	0	0	0	0	0	0	0
2900057B20Rik	5.90191	6.84163	3.97992	18.6303	6.41546	3.43706	9.22286	7.78749	0.947262	4.53244	4.1313	6.34214	8.55276	3.51454	8.4367	9.2154
2900060B14Rik	17.7057	18.8145	20.6956	32.2925	24.058	29.215	43.3475	29.2031	24.6288	31.7271	32.0176	32.7677	35.1613	27.2377	21.5605	29.4893
2900060L22Rik	4.91826	2.56561	3.97992	3.72606	7.21739	8.59265	6.45601	10.7078	9.47262	14.7304	10.3283	6.34214	13.3043	7.90771	10.3115	5.52924
2900076A07Rik	57.0518	59.8643	66.8626	67.069	94.628	58.43	75.6275	79.8218	92.8317	65.7203	79.5275	65.5354	45.6147	65.0189	65.6188	91.2325
2900079G21Rik	0	0	0	0	0	0	0	0	0	0	0	0	0	0	0	0
2900089D17Rik	15.7384	15.3937	22.2875	21.1143	17.6425	8.59265	19.368	12.6547	10.4199	41.925	18.5909	22.1975	19.0061	12.3009	18.7482	12.9016
2900092C05Rik	0.983652	0	0.795983	1.24202	0.801933	0	0	0	0	1.13311	1.03283	0	0.950306	1.75727	0.937411	0.92154
2900092D14Rik	219.354	222.353	229.243	229.773	311.15	386.669	458.376	335.836	280.39	274.212	235.484	200.834	482.756	463.04	357.154	350.185
2900097C17Rik	3025.71	3105.25	2929.22	2707.6	2672.04	2761.68	2963.31	2604.92	3674.43	2616.35	2717.36	2697.52	2722.63	2927.61	2592.88	2924.97
3000002C10Rik	43.2807	45.3258	41.3911	27.3244	57.7391	37.8076	35.0469	76.9015	53.994	56.6555	37.1817	40.1669	37.0619	49.2035	41.2461	39.6262
3010001F23Rik	1.9673	2.56561	7.95983	4.96807	4.00966	1.71853	5.53372	4.86718	3.78905	6.79866	7.22978	3.17107	4.75153	1.75727	8.4367	7.37232
3010003L21Rik	8.85287	11.1177	8.75581	19.8723	10.4251	17.1853	5.53372	11.6812	13.2617	15.8635	11.3611	29.5966	10.4534	8.78634	7.49929	8.29386
3010026O09Rik	407.232	495.163	423.463	376.332	248.599	273.246	320.033	272.562	374.169	453.244	521.577	451.349	257.533	291.707	248.414	198.131
3100003L05Rik	0.983652	0	0	0	0	0	0.922286	0.973436	0	0	0	1.05702	0.950306	0	0	0.92154
3110001I22Rik	56.0682	76.1131	78.8023	96.8775	72.1739	65.3041	71.9383	69.114	97.568	103.113	78.4947	65.5354	60.8196	57.9898	89.9915	78.3309
3110002H16Rik	567.567	584.104	604.947	501.776	521.256	517.277	582.885	567.513	549.412	566.555	557.726	514.77	575.886	535.967	505.265	543.709
3110004A20Rik	0	0	0	0	0	0	0	0	0	0	0	0	0	0	0	0
3110009E18Rik	43.2807	49.6018	32.6353	39.7446	57.7391	51.5559	55.3372	46.7249	60.6248	50.9899	52.6741	66.5924	50.3662	37.7813	41.2461	54.3709
3110009F21Rik	0	0	0	0	0	0	0	0	0	0	1.03283	0	0	0	0	0
3110009M11Rik	1.9673	1.71041	0.795983	0	0	0	0	0	0	0	0	2.11405	0.950306	0	0	1.84308
3110015C05Rik	0	0	0	0	0	0	0	0	0	0	0	0	0	0	0	0
3110021A11Rik	3.93461	3.42082	5.57188	9.93615	5.61353	5.15559	9.22286	4.86718	3.78905	4.53244	6.19695	4.22809	3.80122	0.878634	3.74965	4.6077
3110035E14Rik	9.83652	19.6697	10.3478	16.1462	16.0387	10.3112	15.6789	20.4422	17.0507	13.5973	18.5909	15.8553	19.0061	10.5436	16.8734	20.2739
3110039I08Rik	32.4605	59.8643	42.1871	109.298	74.5797	56.7115	65.4823	85.6624	67.2556	63.4541	45.4443	59.1933	77.9251	68.5335	67.4936	76.4878
3110039M20Rik	0	0	0	0	0	0	0	0	0	0	0	0	0	0	0	0
3110040M04Rik	0	0	0	0	0	0	0	0	0	0	0	0	0	0	0	0
3110040N11Rik	365.919	378	376.5	309.263	257.42	307.617	296.976	235.572	341.014	296.875	365.62	293.852	325.955	325.095	275.599	260.796
3110043O21Rik	339.36	419.905	436.199	324.167	382.522	319.646	407.651	371.853	530.467	296.875	361.489	288.567	304.098	366.39	334.656	433.124
[truncated: 35,132 more rows]
